# Supplementary material for: Mice and Men: Their Promoter Properties
Source: PubMed Central journal article supplement (PMC1449896; doi:10.1371/journal.pgen.0020054), 2006-04-28
Supplement: pgen.0020054.st002.pdf [file pgen.0020054.st002.pdf]

**Table S2. Common and specific promoter elements in the four TSS types**  
Minimum 10% of target promoter sequences contain the motif

| ATrich_B & D_dwn           |              | ATrich_C & D_up            |              | GCrich_B & A_up               |                     | GCrich_C & A_dwn               |                      |
|----------------------------|--------------|----------------------------|--------------|-------------------------------|---------------------|--------------------------------|----------------------|
| Common                     |              | Common                     |              | Common                        |                     | Common                         |                      |
| ++                         | AP-4         | +-                         | AP-4         | ++                            | ADR1                | ++                             | ADR1                 |
| ++                         | Dof3         | --                         | BR-C Z4      | ++                            | AP-2                | ++                             | AP-2                 |
| ++                         | E2F-1        | ++                         | C/EBPbeta    | ++                            | AP-2alpha           | ++                             | AP-2alpha            |
| +-                         | Ets          | ++                         | Dof3         | ++                            | AP-2gamma           | ++                             | AP-2gamma            |
| ++                         | Eve          | ++                         | E2F-1        | ++                            | AP-4                | ++                             | AP-2rep              |
| ++                         | HSF          | ++                         | ETS          | ++                            | Alfin1              | ++                             | AP-4                 |
| +-                         | HSF1         | ++                         | Ets          | ++                            | COUP                | ++                             | COUP                 |
| +-                         | Hb           | ++                         | GC box       | ++                            | CP2/LBP-1c/LSF      | ++                             | CP2/LBP-1c/LSF       |
| +-                         | PBF          | +-                         | Hb           | ++                            | CREB                | ++                             | Churchill            |
| ++                         | STAT4        | ++                         | IRF          | ++                            | Churchill           | ++                             | Dde box              |
| ++                         | c-Myb        | +-                         | Knox3        | ++                            | Dde box             | ++                             | E2F                  |
|                            |              | +-                         | Lyf-1        | ++                            | E2F                 | ++                             | E2F-1                |
|                            |              | ++                         | MYB          | ++                            | E2F-1               | ++                             | ETF                  |
|                            |              | +-                         | MYBAS1       | ++                            | EGR                 | ++                             | Eve                  |
|                            |              | ++                         | NF-1         | ++                            | ETF                 | ++                             | FACB                 |
|                            |              | ++                         | PBF          | ++                            | Elk-1               | ++                             | GAGA factor          |
|                            |              | +-                         | RFX          | ++                            | Ets                 | ++                             | GC box               |
|                            |              | ++                         | STAT3        | ++                            | Eve                 | ++                             | LBP-1                |
|                            |              | ++                         | STAT6        | ++                            | FACB                | ++                             | LF-A1                |
|                            |              | ++                         | Sp-1         | ++                            | GAGA factor         | ++                             | LIM1                 |
|                            |              | ++                         | Sp1          | ++                            | GC box              | ++                             | MZF1                 |
|                            |              | ++                         | Spz1         | ++                            | Knox3               | ++                             | Muscle initiator     |
|                            |              | ++                         | TATA         | ++                            | LF-A1               | ++                             | RAR                  |
|                            |              | ++                         | ZF5          | ++                            | LIM1                | ++                             | RAV1                 |
|                            |              | ++                         | Zic1         | ++                            | MAZ                 | ++                             | RFX                  |
|                            |              | ++                         | Zic3         | ++                            | MZF1                | ++                             | Sp-1                 |
|                            |              | ++                         | c-Ets-1(p54) | ++                            | Muscle initiator    | ++                             | Sp1                  |
|                            |              |                            |              | ++                            | NF-1                | ++                             | Spz1                 |
|                            |              |                            |              | ++                            | PU.1                | ++                             | TFII-I               |
|                            |              |                            |              | ++                            | RAR                 | ++                             | VDR                  |
|                            |              |                            |              | ++                            | RAV1                | ++                             | ZF5                  |
|                            |              |                            |              | ++                            | Sp-1                | ++                             | Zic1                 |
|                            |              |                            |              | ++                            | Sp1                 | ++                             | Zic2                 |
|                            |              |                            |              | ++                            | Sp3                 | ++                             | Zic3                 |
|                            |              |                            |              | ++                            | Spz1                | ++                             | p300                 |
|                            |              |                            |              | ++                            | TFII-I              | ++                             | p53 decamer          |
|                            |              |                            |              | ++                            | VDR                 |                                |                      |
|                            |              |                            |              | ++                            | ZF5                 |                                |                      |
|                            |              |                            |              | ++                            | Zic1                |                                |                      |
|                            |              |                            |              | ++                            | Zic2                |                                |                      |
|                            |              |                            |              | ++                            | Zic3                |                                |                      |
|                            |              |                            |              | ++                            | c-Ets-1(p54)        |                                |                      |
|                            |              |                            |              | ++                            | p300                |                                |                      |
|                            |              |                            |              | ++                            | p53 decamer         |                                |                      |
| <b>Unique for ATrich_B</b> |              | <b>Unique for ATrich_C</b> |              | <b>Unique for GCrich_B</b>    |                     | <b>Unique for GCrich_C</b>     |                      |
| +                          | AP-2         | +                          | AP-2         | +                             | AP-2rep             | +                              | Ets                  |
| -                          | AP-2gamma    | +                          | AP-2gamma    | +                             | CAC-binding protein | +                              | HNF-4                |
| -                          | BR-C Z4      | +                          | Churchill    | +                             | ETS                 | +                              | Ik-2                 |
| +                          | C1           | +                          | E2F          | +                             | HNF-4               | +                              | Knox3                |
| +                          | Churchill    | +                          | Elk-1        | -                             | Ik-2                | -                              | MAF                  |
| +                          | E2F          | +                          | Eve          | +                             | Lyf-1               | +                              | MyoD                 |
| -                          | ETS          | +                          | FACB         | +                             | MYBAS1              | +                              | PPAR                 |
| -                          | FAC1         | -                          | FOXD3        | +                             | P                   | -                              | PPAR direct repeat 1 |
| -                          | FACB         | -                          | HNF-3        | +                             | PPAR                | +                              | STAT3                |
| -                          | FOXD3        | +                          | HNF-4        | -                             | Pax                 | +                              | STAT6                |
| +                          | GAGA factor  | +                          | Ik-2         | +                             | RFX                 | +                              | TTF-1                |
| -                          | HNF-3        | +                          | NF-AT        | +                             | STAT3               | +                              | XPF-1                |
| +                          | Helios A     | -                          | PPAR         | +                             | STAT6               | -                              | c-Ets-1(p54)         |
| +                          | IRF          | +                          | PU.1         | -                             | USF                 |                                |                      |
| -                          | Ik-2         | +                          | TFIIA        |                               |                     |                                |                      |
| +                          | LIM1         | +                          | p300         |                               |                     |                                |                      |
| -                          | Lyf-1        |                            |              |                               |                     |                                |                      |
| +                          | MYB          |                            |              |                               |                     |                                |                      |
| -                          | Pax          |                            |              |                               |                     |                                |                      |
| -                          | RFX          |                            |              |                               |                     |                                |                      |
| +                          | STAT3        |                            |              |                               |                     |                                |                      |
| +                          | STAT6        |                            |              |                               |                     |                                |                      |
| +                          | Spz1         |                            |              |                               |                     |                                |                      |
| +                          | VDR          |                            |              |                               |                     |                                |                      |
| +                          | ZF5          |                            |              |                               |                     |                                |                      |
| +                          | Zic1         |                            |              |                               |                     |                                |                      |
| +                          | c-Ets-1(p54) |                            |              |                               |                     |                                |                      |
| +                          | p300         |                            |              |                               |                     |                                |                      |
| <b>Unique for D_dwn</b>    |              | <b>Unique for D_up</b>     |              | <b>Unique for GCrich_A_up</b> |                     | <b>Unique for GCrich_A_dwn</b> |                      |
| +                          | DBP          | +                          | ADR1         | +                             | AHRHIF              | +                              | Adf-1                |
| +                          | Ncx          | +                          | AP-1         | +                             | CF1 / USP           | +                              | Alfin1               |
|                            |              | +                          | C1           | +                             | Hairy               | +                              | CF1 / USP            |
|                            |              | +                          | C_EBP        | +                             | KROX                | +                              | EGR                  |
|                            |              | +                          | HNF-1        | +                             | LBP-1               | +                              | P                    |
|                            |              | +                          | TCF11        | +                             | MAZR                | +                              | PCF2                 |
|                            |              | +                          | VDR          | +                             | PCF2                |                                |                      |
|                            |              | +                          | c-Myb        | +                             | USF2                |                                |                      |
|                            |              | +                          |              | +                             | c-Myc:Max           |                                |                      |
