# Supplementary material for: Mice and Men: Their Promoter Properties
Source: PubMed Central journal article supplement (PMC1449896; doi:10.1371/journal.pgen.0020054), 2006-04-28
Supplement: pgen.0020054.st003.pdf [file pgen.0020054.st003.pdf]

**Table S3**

The lists of significant PEs in different TSS types and in upstream and downstream segments.

The yellow highlighted TFs are unique for the considered groups when compared with the same upstream or downstream segment of another TSS group with the same GC-richness

| B_dwn        | D_dwn | C_up         | D_up         | B_up             | A_up             | C_dwn            | A_dwn            |
|--------------|-------|--------------|--------------|------------------|------------------|------------------|------------------|
| AP-4         | AP-4  | AP-4         | C/EBPbeta    | ADR1             | ADR1             | ADR1             | ADR1             |
| Dof3         | Dof3  | C/EBPbeta    | Dof3         | AP-2             | AP-2             | AP-2             | AP-2             |
| E2F-1        | E2F-1 | Dof3         | E2F-1        | AP-2alpha        | AP-2alpha        | AP-2alpha        | AP-2alpha        |
| Ets          | Eve   | E2F-1        | ETS          | AP-2gamma        | AP-2gamma        | AP-2gamma        | AP-2gamma        |
| Eve          | HSF   | ETS          | Ets          | AP-4             | AP-4             | AP-2rep          | AP-2rep          |
| HSF          | HSF1  | Ets          | GC box       | Alfin1           | Alfin1           | AP-4             | AP-4             |
| Hb           | STAT4 | GC box       | IRF          | COUP             | COUP             | COUP             | COUP             |
| PBF          | c-Myb | Hb           | Lyf-1        | CP2/LBP-1c/LSF   | CP2/LBP-1c/LSF   | CP2/LBP-1c/LSF   | CP2/LBP-1c/LSF   |
| STAT4        | DBP   | IRF          | MYB          | CREB             | CREB             | Churchill        | Churchill        |
| c-Myb        | Ncx   | Knox3        | MYBAS1       | Churchill        | Churchill        | Dde box          | Dde box          |
| AP-2         |       | MYB          | NF-1         | Dde box          | Dde box          | E2F              | E2F              |
| C1           |       | NF-1         | PBF          | E2F              | E2F              | E2F-1            | E2F-1            |
| Churchill    |       | PBF          | RFX          | E2F-1            | E2F-1            | ETF              | ETF              |
| E2F          |       | STAT3        | STAT3        | EGR              | EGR              | Eve              | Eve              |
| GAGA factor  |       | STAT6        | STAT6        | ETF              | ETF              | FACB             | FACB             |
| Helios A     |       | Sp-1         | Sp-1         | Elk-1            | Elk-1            | GAGA factor      | GAGA factor      |
| IRF          |       | Sp1          | Sp1          | Ets              | Ets              | GC box           | GC box           |
| LIM1         |       | Spz1         | Spz1         | Eve              | Eve              | LBP-1            | LBP-1            |
| MYB          |       | TATA         | TATA         | FACB             | FACB             | LF-A1            | LF-A1            |
| STAT3        |       | ZF5          | ZF5          | GAGA factor      | GAGA factor      | LIM1             | LIM1             |
| STAT6        |       | Zic1         | Zic1         | GC box           | GC box           | MZF1             | MZF1             |
| Spz1         |       | Zic3         | Zic3         | Knox3            | Knox3            | Muscle initiator | Muscle initiator |
| VDR          |       | c-Ets-1(p54) | c-Ets-1(p54) | LF-A1            | LF-A1            | RAR              | RAR              |
| ZF5          |       | AP-2         | ADR1         | LIM1             | LIM1             | RAV1             | RAV1             |
| Zic1         |       | AP-2gamma    | AP-1         | MAZ              | MAZ              | RFX              | RFX              |
| c-Ets-1(p54) |       | Churchill    | C1           | MZF1             | MZF1             | Sp-1             | Sp-1             |
| p300         |       | E2F          | C_EBP        | Muscle initiator | Muscle initiator | Sp1              | Sp1              |
|              |       | Elk-1        | HNF-1        | NF-1             | NF-1             | Spz1             | Spz1             |
|              |       | Eve          | TCF11        | PU.1             | PU.1             | TFII-I           | TFII-I           |

|       |       |                   |              |             |             |
|-------|-------|-------------------|--------------|-------------|-------------|
| FACB  | VDR   | RAR               | RAR          | VDR         | VDR         |
| HNF-4 | c-Myb | RAV1              | RAV1         | ZF5         | ZF5         |
| Ik-2  |       | Sp-1              | Sp-1         | Zic1        | Zic1        |
| NF-AT |       | Sp1               | Sp1          | Zic2        | Zic2        |
| PU.1  |       | Sp3               | Sp3          | Zic3        | Zic3        |
| TFIIA |       | Spz1              | Spz1         | p300        | p300        |
| p300  |       | TFII-I            | TFII-I       | p53 decamer | p53 decamer |
|       |       | VDR               | VDR          | Ets         | Adf-1       |
|       |       | ZF5               | ZF5          | HNF-4       | Alfin1      |
|       |       | Zic1              | Zic1         | Ik-2        | CF1 / USP   |
|       |       | Zic2              | Zic2         | Knox3       | EGR         |
|       |       | Zic3              | Zic3         | MyoD        | P           |
|       |       | c-Ets-1(p54)      | c-Ets-1(p54) | PPAR        | PCF2        |
|       |       | p300              | p300         | STAT3       |             |
|       |       | p53 decamer       | p53 decamer  | STAT6       |             |
|       |       | AP-2rep           | AHRHIF       | TTF-1       |             |
|       |       | CAC-binding prote | CF1 / USP    | XPF-1       |             |
|       |       | ETS               | Hairy        |             |             |
|       |       | HNF-4             | KROX         |             |             |
|       |       | Lyf-1             | LBP-1        |             |             |
|       |       | MYBAS1            | MAZR         |             |             |
|       |       | P                 | PCF2         |             |             |
|       |       | PPAR              | USF2         |             |             |
|       |       | RFX               | c-Myc:Max    |             |             |
|       |       | STAT3             |              |             |             |
|       |       | STAT6             |              |             |             |
