# Supplementary material for: Mice and Men: Their Promoter Properties
Source: PubMed Central journal article supplement (PMC1449896; doi:10.1371/journal.pgen.0020054), 2006-04-28
Supplement: pgen.0020054.st004.pdf [file pgen.0020054.st004.pdf]

**Table S4.** The list of GO categories that preserve enrichment in specific TSS type between human and mouse. We considered only those TSSs whose generated transcripts belong to the same homology group as defined on NCBI web-site. We only considered GO categories that were supported by at least 60 TSSs and where the target TSS type was supported by at least 3 TSSs.

| Type A                                                                  | Human   |    |       |            | mouse   |    |      |            |
|-------------------------------------------------------------------------|---------|----|-------|------------|---------|----|------|------------|
| GOID                                                                    | Total # | #A | %A    | enrichment | Total # | #A | %A   | enrichment |
| <b>Matched GO groups: 0, Total # of GO groups: 0</b>                    |         |    |       |            |         |    |      |            |
|                                                                         |         |    |       |            |         |    |      |            |
| Type B                                                                  | Human   |    |       |            | Mouse   |    |      |            |
| GOID                                                                    | Total # | #B | %B    | enrichment | Total # | #B | %B   | enrichment |
|                                                                         |         |    |       |            |         |    |      |            |
| GO:0003700                                                              | 102     | 6  | 5.88  | 3.74       | 117     | 7  | 5.98 | 2.77       |
| GO:0003676                                                              | 91      | 4  | 4.4   | 2.79       | 228     | 9  | 3.95 | 1.83       |
| GO:0006355                                                              | 239     | 10 | 4.18  | 2.66       | 303     | 14 | 4.62 | 2.14       |
| GO:0005737                                                              | 256     | 9  | 3.52  | 2.23       | 285     | 13 | 4.56 | 2.11       |
| GO:0006350                                                              | 217     | 6  | 2.76  | 1.76       | 231     | 12 | 5.19 | 2.4        |
| GO:0016491                                                              | 149     | 4  | 2.68  | 1.71       | 196     | 9  | 4.59 | 2.13       |
| GO:0005634                                                              | 711     | 19 | 2.67  | 1.7        | 886     | 42 | 4.74 | 2.19       |
| <b>Matched GO groups: 7, Total # of GO groups: 7, Coverage: 100%</b>    |         |    |       |            |         |    |      |            |
|                                                                         |         |    |       |            |         |    |      |            |
| Type C                                                                  | human   |    |       |            | Mouse   |    |      |            |
| GOID                                                                    | Total # | #C | %C    | enrichment | Total # | #C | %C   | enrichment |
|                                                                         |         |    |       |            |         |    |      |            |
| GO:0005615                                                              | 69      | 8  | 11.59 | 4.14       | 428     | 41 | 9.58 | 2.58       |
| GO:0007155                                                              | 68      | 7  | 10.29 | 3.67       | 88      | 8  | 9.09 | 2.45       |
| GO:0006412                                                              | 105     | 7  | 6.67  | 2.38       | 118     | 9  | 7.63 | 2.05       |
| GO:0003735                                                              | 69      | 4  | 5.8   | 2.07       | 93      | 8  | 8.6  | 2.32       |
| GO:0005795                                                              | 109     | 6  | 5.5   | 1.96       |         |    |      |            |
| GO:0016874                                                              | 73      | 4  | 5.48  | 1.95       | 90      | 7  | 7.78 | 2.09       |
| GO:0005509                                                              | 116     | 6  | 5.17  | 1.85       | 137     | 11 | 8.03 | 2.16       |
| GO:0005624                                                              | 120     | 6  | 5     | 1.78       |         |    |      |            |
| GO:0005886                                                              | 81      | 4  | 4.94  | 1.76       | 95      | 8  | 8.42 | 2.27       |
| GO:0007165                                                              | 146     | 7  | 4.79  | 1.71       |         |    |      |            |
| GO:0004842                                                              | 85      | 4  | 4.71  | 1.68       |         |    |      |            |
| GO:0003723                                                              | 155     | 7  | 4.52  | 1.61       |         |    |      |            |
| GO:0007049                                                              | 89      | 4  | 4.49  | 1.6        | 114     | 7  | 6.14 | 1.65       |
| GO:0008270                                                              | 205     | 9  | 4.39  | 1.57       | 176     | 12 | 6.82 | 1.84       |
| <b>Matched GO groups: 9, Total # of GO groups: 14, Coverage: 64.29%</b> |         |    |       |            |         |    |      |            |
|                                                                         |         |    |       |            |         |    |      |            |
| Type D                                                                  | human   |    |       |            | mouse   |    |      |            |
| GOID                                                                    | Total # | #D | %D    | enrichment | Total # | #D | %D   | enrichment |
|                                                                         |         |    |       |            |         |    |      |            |
| GO:0005615                                                              | 69      | 6  | 8.7   | 5.28       | 428     | 26 | 6.07 | 3.88       |
| GO:0006810                                                              | 113     | 8  | 7.08  | 4.3        | 392     | 11 | 2.81 | 1.79       |
| GO:0007165                                                              | 146     | 8  | 5.48  | 3.33       |         |    |      |            |
| GO:0005887                                                              | 147     | 7  | 4.76  | 2.89       |         |    |      |            |
| GO:0004872                                                              | 92      | 4  | 4.35  | 2.64       | 184     | 10 | 5.43 | 3.47       |
| GO:0005509                                                              | 116     | 4  | 3.45  | 2.1        | 137     | 9  | 6.57 | 4.19       |
| GO:0008372                                                              | 134     | 4  | 2.99  | 1.81       | 260     | 8  | 3.08 | 1.96       |
| GO:0016020                                                              | 312     | 9  | 2.88  | 1.75       | 416     | 14 | 3.37 | 2.15       |
| GO:0016021                                                              | 451     | 13 | 2.88  | 1.75       | 768     | 27 | 3.52 | 2.24       |
| GO:0006355                                                              | 239     | 6  | 2.51  | 1.53       | 303     | 10 | 3.3  | 2.11       |
| <b>Matched GO groups: 8, Total # of GO groups: 10, Coverage: 80%</b>    |         |    |       |            |         |    |      |            |
