# Supplementary material for: Mice and Men: Their Promoter Properties
Source: PubMed Central journal article supplement (PMC1449896; doi:10.1371/journal.pgen.0020054), 2006-04-28
Supplement: pgen.0020054.st005.pdf [file pgen.0020054.st005.pdf]

| GOID       | Total | #A  | %A    | Change A | #B | %B   | Change B | #C | %C   | Change C | #D | %D   | Change D | p-value A | p-value B | p-value C | p-value D |
|------------|-------|-----|-------|----------|----|------|----------|----|------|----------|----|------|----------|-----------|-----------|-----------|-----------|
| GO:0000002 | 1     | 1   | 100   | 1.13     | 0  | 0    | 0        | 0  | 0    | 0        | 0  | 0    | 0        | 1         | 1         | 1         | 1         |
| GO:0000004 | 219   | 197 | 89.95 | 1.02     | 7  | 3.2  | 0.92     | 11 | 5.02 | 1.08     | 4  | 1.83 | 0.52     | 1         | 1         | 1         | 1         |
| GO:0000005 | 4     | 4   | 100   | 1.13     | 0  | 0    | 0        | 0  | 0    | 0        | 0  | 0    | 0        | 1         | 1         | 1         | 1         |
| GO:0000008 | 38    | 34  | 89.47 | 1.01     | 1  | 2.63 | 0.75     | 3  | 7.89 | 1.7      | 0  | 0    | 0        | 1         | 1         | 1         | 1         |
| GO:0000009 | 4     | 4   | 100   | 1.13     | 0  | 0    | 0        | 0  | 0    | 0        | 0  | 0    | 0        | 1         | 1         | 1         | 1         |
| GO:0000012 | 3     | 3   | 100   | 1.13     | 0  | 0    | 0        | 0  | 0    | 0        | 0  | 0    | 0        | 1         | 1         | 1         | 1         |
| GO:0000015 | 6     | 6   | 100   | 1.13     | 0  | 0    | 0        | 0  | 0    | 0        | 0  | 0    | 0        | 1         | 1         | 1         | 1         |
| GO:0000022 | 4     | 3   | 75    | 0.85     | 1  | 25   | 7.16     | 0  | 0    | 0        | 0  | 0    | 0        | 1         | 1         | 1         | 1         |
| GO:0000026 | 4     | 4   | 100   | 1.13     | 0  | 0    | 0        | 0  | 0    | 0        | 0  | 0    | 0        | 1         | 1         | 1         | 1         |
| GO:0000027 | 1     | 1   | 100   | 1.13     | 0  | 0    | 0        | 0  | 0    | 0        | 0  | 0    | 0        | 1         | 1         | 1         | 1         |
| GO:0000030 | 11    | 11  | 100   | 1.13     | 0  | 0    | 0        | 0  | 0    | 0        | 0  | 0    | 0        | 1         | 1         | 1         | 1         |
| GO:0000033 | 4     | 4   | 100   | 1.13     | 0  | 0    | 0        | 0  | 0    | 0        | 0  | 0    | 0        | 1         | 1         | 1         | 1         |
| GO:0000036 | 3     | 3   | 100   | 1.13     | 0  | 0    | 0        | 0  | 0    | 0        | 0  | 0    | 0        | 1         | 1         | 1         | 1         |
| GO:0000038 | 1     | 1   | 100   | 1.13     | 0  | 0    | 0        | 0  | 0    | 0        | 0  | 0    | 0        | 1         | 1         | 1         | 1         |
| GO:0000042 | 3     | 3   | 100   | 1.13     | 0  | 0    | 0        | 0  | 0    | 0        | 0  | 0    | 0        | 1         | 1         | 1         | 1         |
| GO:0000045 | 3     | 3   | 100   | 1.13     | 0  | 0    | 0        | 0  | 0    | 0        | 0  | 0    | 0        | 1         | 1         | 1         | 1         |
| GO:0000047 | 6     | 6   | 100   | 1.13     | 0  | 0    | 0        | 0  | 0    | 0        | 0  | 0    | 0        | 1         | 1         | 1         | 1         |
| GO:0000049 | 9     | 9   | 100   | 1.13     | 0  | 0    | 0        | 0  | 0    | 0        | 0  | 0    | 0        | 1         | 1         | 1         | 1         |
| GO:0000050 | 4     | 1   | 25    | 0.28     | 0  | 0    | 0        | 2  | 50   | 10.76    | 1  | 25   | 7.06     | 1         | 1         | 1         | 1         |
| GO:0000059 | 14    | 13  | 92.86 | 1.05     | 0  | 0    | 0        | 1  | 7.14 | 1.54     | 0  | 0    | 0        | 1         | 1         | 1         | 1         |
| GO:0000060 | 5     | 5   | 100   | 1.13     | 0  | 0    | 0        | 0  | 0    | 0        | 0  | 0    | 0        | 1         | 1         | 1         | 1         |
| GO:0000062 | 20    | 20  | 100   | 1.13     | 0  | 0    | 0        | 0  | 0    | 0        | 0  | 0    | 0        | 1         | 1         | 1         | 1         |
| GO:0000067 | 5     | 5   | 100   | 1.13     | 0  | 0    | 0        | 0  | 0    | 0        | 0  | 0    | 0        | 1         | 1         | 1         | 1         |
| GO:0000070 | 3     | 3   | 100   | 1.13     | 0  | 0    | 0        | 0  | 0    | 0        | 0  | 0    | 0        | 1         | 1         | 1         | 1         |
| GO:0000072 | 1     | 1   | 100   | 1.13     | 0  | 0    | 0        | 0  | 0    | 0        | 0  | 0    | 0        | 1         | 1         | 1         | 1         |
| GO:0000074 | 237   | 214 | 90.3  | 1.02     | 4  | 1.69 | 0.48     | 15 | 6.33 | 1.36     | 4  | 1.69 | 0.48     | 1         | 1         | 1         | 1         |
| GO:0000075 | 3     | 3   | 100   | 1.13     | 0  | 0    | 0        | 0  | 0    | 0        | 0  | 0    | 0        | 1         | 1         | 1         | 1         |
| GO:0000077 | 7     | 7   | 100   | 1.13     | 0  | 0    | 0        | 0  | 0    | 0        | 0  | 0    | 0        | 1         | 1         | 1         | 1         |
| GO:0000079 | 11    | 11  | 100   | 1.13     | 0  | 0    | 0        | 0  | 0    | 0        | 0  | 0    | 0        | 1         | 1         | 1         | 1         |
| GO:0000080 | 2     | 2   | 100   | 1.13     | 0  | 0    | 0        | 0  | 0    | 0        | 0  | 0    | 0        | 1         | 1         | 1         | 1         |
| GO:0000082 | 41    | 40  | 97.56 | 1.1      | 0  | 0    | 0        | 0  | 0    | 0        | 1  | 2.44 | 0.69     | 1         | 1         | 1         | 1         |
| GO:0000084 | 1     | 1   | 100   | 1.13     | 0  | 0    | 0        | 0  | 0    | 0        | 0  | 0    | 0        | 1         | 1         | 1         | 1         |
| GO:0000085 | 3     | 3   | 100   | 1.13     | 0  | 0    | 0        | 0  | 0    | 0        | 0  | 0    | 0        | 1         | 1         | 1         | 1         |
| GO:0000086 | 4     | 4   | 100   | 1.13     | 0  | 0    | 0        | 0  | 0    | 0        | 0  | 0    | 0        | 1         | 1         | 1         | 1         |
| GO:0000087 | 7     | 7   | 100   | 1.13     | 0  | 0    | 0        | 0  | 0    | 0        | 0  | 0    | 0        | 1         | 1         | 1         | 1         |
| GO:0000094 | 1     | 1   | 100   | 1.13     | 0  | 0    | 0        | 0  | 0    | 0        | 0  | 0    | 0        | 1         | 1         | 1         | 1         |
| GO:0000096 | 2     | 2   | 100   | 1.13     | 0  | 0    | 0        | 0  | 0    | 0        | 0  | 0    | 0        | 1         | 1         | 1         | 1         |
| GO:0000103 | 5     | 4   | 80    | 0.91     | 0  | 0    | 0        | 0  | 0    | 0        | 1  | 20   | 5.64     | 1         | 1         | 1         | 1         |
| GO:0000104 | 2     | 2   | 100   | 1.13     | 0  | 0    | 0        | 0  | 0    | 0        | 0  | 0    | 0        | 1         | 1         | 1         | 1         |
| GO:0000106 | 1     | 1   | 100   | 1.13     | 0  | 0    | 0        | 0  | 0    | 0        | 0  | 0    | 0        | 1         | 1         | 1         | 1         |

|            |     |     |       |      |   |       |       |   |       |      |   |       |       |   |   |   |
|------------|-----|-----|-------|------|---|-------|-------|---|-------|------|---|-------|-------|---|---|---|
| GO:0000109 | 3   | 3   | 100   | 1.13 | 0 | 0     | 0     | 0 | 0     | 0    | 0 | 0     | 1     | 1 | 1 | 1 |
| GO:0000118 | 11  | 11  | 100   | 1.13 | 0 | 0     | 0     | 0 | 0     | 0    | 0 | 0     | 1     | 1 | 1 | 1 |
| GO:0000119 | 11  | 5   | 45.45 | 0.51 | 2 | 18.18 | 5.21  | 1 | 9.09  | 1.96 | 3 | 27.27 | 7.7   | 1 | 1 | 1 |
| GO:0000120 | 2   | 2   | 100   | 1.13 | 0 | 0     | 0     | 0 | 0     | 0    | 0 | 0     | 1     | 1 | 1 | 1 |
| GO:0000122 | 53  | 49  | 92.45 | 1.05 | 2 | 3.77  | 1.08  | 2 | 3.77  | 0.81 | 0 | 0     | 0     | 1 | 1 | 1 |
| GO:0000123 | 6   | 5   | 83.33 | 0.94 | 0 | 0     | 0     | 1 | 16.67 | 3.59 | 0 | 0     | 0     | 1 | 1 | 1 |
| GO:0000127 | 2   | 2   | 100   | 1.13 | 0 | 0     | 0     | 0 | 0     | 0    | 0 | 0     | 1     | 1 | 1 | 1 |
| GO:0000137 | 2   | 2   | 100   | 1.13 | 0 | 0     | 0     | 0 | 0     | 0    | 0 | 0     | 1     | 1 | 1 | 1 |
| GO:0000139 | 49  | 47  | 95.92 | 1.09 | 0 | 0     | 0     | 2 | 4.08  | 0.88 | 0 | 0     | 0     | 1 | 1 | 1 |
| GO:0000145 | 7   | 7   | 100   | 1.13 | 0 | 0     | 0     | 0 | 0     | 0    | 0 | 0     | 1     | 1 | 1 | 1 |
| GO:0000147 | 6   | 6   | 100   | 1.13 | 0 | 0     | 0     | 0 | 0     | 0    | 0 | 0     | 1     | 1 | 1 | 1 |
| GO:0000149 | 2   | 2   | 100   | 1.13 | 0 | 0     | 0     | 0 | 0     | 0    | 0 | 0     | 1     | 1 | 1 | 1 |
| GO:0000151 | 33  | 25  | 75.76 | 0.86 | 2 | 6.06  | 1.74  | 6 | 18.18 | 3.91 | 0 | 0     | 0     | 1 | 1 | 1 |
| GO:0000152 | 1   | 1   | 100   | 1.13 | 0 | 0     | 0     | 0 | 0     | 0    | 0 | 0     | 1     | 1 | 1 | 1 |
| GO:0000154 | 9   | 9   | 100   | 1.13 | 0 | 0     | 0     | 0 | 0     | 0    | 0 | 0     | 1     | 1 | 1 | 1 |
| GO:0000155 | 6   | 6   | 100   | 1.13 | 0 | 0     | 0     | 0 | 0     | 0    | 0 | 0     | 1     | 1 | 1 | 1 |
| GO:0000157 | 35  | 33  | 94.29 | 1.07 | 1 | 2.86  | 0.82  | 0 | 0     | 0    | 1 | 2.86  | 0.81  | 1 | 1 | 1 |
| GO:0000158 | 15  | 14  | 93.33 | 1.06 | 1 | 6.67  | 1.91  | 0 | 0     | 0    | 0 | 0     | 0     | 1 | 1 | 1 |
| GO:0000159 | 22  | 21  | 95.45 | 1.08 | 0 | 0     | 0     | 0 | 0     | 0    | 1 | 4.55  | 1.28  | 1 | 1 | 1 |
| GO:0000160 | 58  | 58  | 100   | 1.13 | 0 | 0     | 0     | 0 | 0     | 0    | 0 | 0     | 0     | 1 | 1 | 1 |
| GO:0000163 | 17  | 17  | 100   | 1.13 | 0 | 0     | 0     | 0 | 0     | 0    | 0 | 0     | 0     | 1 | 1 | 1 |
| GO:0000164 | 2   | 2   | 100   | 1.13 | 0 | 0     | 0     | 0 | 0     | 0    | 0 | 0     | 0     | 1 | 1 | 1 |
| GO:0000165 | 23  | 20  | 86.96 | 0.98 | 2 | 8.7   | 2.49  | 1 | 4.35  | 0.94 | 0 | 0     | 0     | 1 | 1 | 1 |
| GO:0000166 | 167 | 156 | 93.41 | 1.06 | 4 | 2.4   | 0.69  | 5 | 2.99  | 0.64 | 2 | 1.2   | 0.34  | 1 | 1 | 1 |
| GO:0000171 | 4   | 4   | 100   | 1.13 | 0 | 0     | 0     | 0 | 0     | 0    | 0 | 0     | 0     | 1 | 1 | 1 |
| GO:0000172 | 6   | 5   | 83.33 | 0.94 | 1 | 16.67 | 4.77  | 0 | 0     | 0    | 0 | 0     | 0     | 1 | 1 | 1 |
| GO:0000175 | 12  | 12  | 100   | 1.13 | 0 | 0     | 0     | 0 | 0     | 0    | 0 | 0     | 0     | 1 | 1 | 1 |
| GO:0000178 | 2   | 2   | 100   | 1.13 | 0 | 0     | 0     | 0 | 0     | 0    | 0 | 0     | 0     | 1 | 1 | 1 |
| GO:0000179 | 7   | 7   | 100   | 1.13 | 0 | 0     | 0     | 0 | 0     | 0    | 0 | 0     | 0     | 1 | 1 | 1 |
| GO:0000184 | 1   | 1   | 100   | 1.13 | 0 | 0     | 0     | 0 | 0     | 0    | 0 | 0     | 0     | 1 | 1 | 1 |
| GO:0000186 | 1   | 0   | 0     | 0    | 1 | 100   | 28.63 | 0 | 0     | 0    | 0 | 0     | 0     | 1 | 1 | 1 |
| GO:0000187 | 5   | 1   | 20    | 0.23 | 1 | 20    | 5.73  | 0 | 0     | 0    | 3 | 60    | 16.93 | 1 | 1 | 1 |
| GO:0000188 | 7   | 5   | 71.43 | 0.81 | 1 | 14.29 | 4.09  | 0 | 0     | 0    | 1 | 14.29 | 4.03  | 1 | 1 | 1 |
| GO:0000209 | 5   | 5   | 100   | 1.13 | 0 | 0     | 0     | 0 | 0     | 0    | 0 | 0     | 0     | 1 | 1 | 1 |
| GO:0000211 | 3   | 2   | 66.67 | 0.75 | 0 | 0     | 0     | 1 | 33.33 | 7.18 | 0 | 0     | 0     | 1 | 1 | 1 |
| GO:0000213 | 1   | 1   | 100   | 1.13 | 0 | 0     | 0     | 0 | 0     | 0    | 0 | 0     | 0     | 1 | 1 | 1 |
| GO:0000214 | 1   | 1   | 100   | 1.13 | 0 | 0     | 0     | 0 | 0     | 0    | 0 | 0     | 0     | 1 | 1 | 1 |
| GO:0000219 | 10  | 10  | 100   | 1.13 | 0 | 0     | 0     | 0 | 0     | 0    | 0 | 0     | 0     | 1 | 1 | 1 |
| GO:0000225 | 1   | 1   | 100   | 1.13 | 0 | 0     | 0     | 0 | 0     | 0    | 0 | 0     | 0     | 1 | 1 | 1 |
| GO:0000226 | 6   | 6   | 100   | 1.13 | 0 | 0     | 0     | 0 | 0     | 0    | 0 | 0     | 0     | 1 | 1 | 1 |
| GO:0000228 | 9   | 8   | 88.89 | 1.01 | 0 | 0     | 0     | 1 | 11.11 | 2.39 | 0 | 0     | 0     | 1 | 1 | 1 |

|            |     |     |       |      |   |       |       |   |       |       |   |       |      |   |   |   |   |
|------------|-----|-----|-------|------|---|-------|-------|---|-------|-------|---|-------|------|---|---|---|---|
| GO:0000230 | 4   | 4   | 100   | 1.13 | 0 | 0     | 0     | 0 | 0     | 0     | 0 | 0     | 0    | 1 | 1 | 1 | 1 |
| GO:0000232 | 2   | 2   | 100   | 1.13 | 0 | 0     | 0     | 0 | 0     | 0     | 0 | 0     | 0    | 1 | 1 | 1 | 1 |
| GO:0000242 | 4   | 4   | 100   | 1.13 | 0 | 0     | 0     | 0 | 0     | 0     | 0 | 0     | 0    | 1 | 1 | 1 | 1 |
| GO:0000244 | 2   | 2   | 100   | 1.13 | 0 | 0     | 0     | 0 | 0     | 0     | 0 | 0     | 0    | 1 | 1 | 1 | 1 |
| GO:0000245 | 9   | 7   | 77.78 | 0.88 | 2 | 22.22 | 6.36  | 0 | 0     | 0     | 0 | 0     | 0    | 1 | 1 | 1 | 1 |
| GO:0000247 | 3   | 3   | 100   | 1.13 | 0 | 0     | 0     | 0 | 0     | 0     | 0 | 0     | 0    | 1 | 1 | 1 | 1 |
| GO:0000250 | 1   | 1   | 100   | 1.13 | 0 | 0     | 0     | 0 | 0     | 0     | 0 | 0     | 0    | 1 | 1 | 1 | 1 |
| GO:0000253 | 1   | 1   | 100   | 1.13 | 0 | 0     | 0     | 0 | 0     | 0     | 0 | 0     | 0    | 1 | 1 | 1 | 1 |
| GO:0000254 | 1   | 1   | 100   | 1.13 | 0 | 0     | 0     | 0 | 0     | 0     | 0 | 0     | 0    | 1 | 1 | 1 | 1 |
| GO:0000257 | 1   | 1   | 100   | 1.13 | 0 | 0     | 0     | 0 | 0     | 0     | 0 | 0     | 0    | 1 | 1 | 1 | 1 |
| GO:0000260 | 2   | 2   | 100   | 1.13 | 0 | 0     | 0     | 0 | 0     | 0     | 0 | 0     | 0    | 1 | 1 | 1 | 1 |
| GO:0000263 | 7   | 7   | 100   | 1.13 | 0 | 0     | 0     | 0 | 0     | 0     | 0 | 0     | 0    | 1 | 1 | 1 | 1 |
| GO:0000264 | 2   | 2   | 100   | 1.13 | 0 | 0     | 0     | 0 | 0     | 0     | 0 | 0     | 0    | 1 | 1 | 1 | 1 |
| GO:0000265 | 6   | 3   | 50    | 0.57 | 3 | 50    | 14.32 | 0 | 0     | 0     | 0 | 0     | 0    | 1 | 1 | 1 | 1 |
| GO:0000271 | 3   | 3   | 100   | 1.13 | 0 | 0     | 0     | 0 | 0     | 0     | 0 | 0     | 0    | 1 | 1 | 1 | 1 |
| GO:0000278 | 5   | 5   | 100   | 1.13 | 0 | 0     | 0     | 0 | 0     | 0     | 0 | 0     | 0    | 1 | 1 | 1 | 1 |
| GO:0000287 | 95  | 93  | 97.89 | 1.11 | 1 | 1.05  | 0.3   | 0 | 0     | 0     | 1 | 1.05  | 0.3  | 1 | 1 | 1 | 1 |
| GO:0000299 | 1   | 1   | 100   | 1.13 | 0 | 0     | 0     | 0 | 0     | 0     | 0 | 0     | 0    | 1 | 1 | 1 | 1 |
| GO:0000300 | 3   | 2   | 66.67 | 0.75 | 0 | 0     | 0     | 1 | 33.33 | 7.18  | 0 | 0     | 0    | 1 | 1 | 1 | 1 |
| GO:0000302 | 4   | 4   | 100   | 1.13 | 0 | 0     | 0     | 0 | 0     | 0     | 0 | 0     | 0    | 1 | 1 | 1 | 1 |
| GO:0000307 | 9   | 9   | 100   | 1.13 | 0 | 0     | 0     | 0 | 0     | 0     | 0 | 0     | 0    | 1 | 1 | 1 | 1 |
| GO:0000320 | 4   | 4   | 100   | 1.13 | 0 | 0     | 0     | 0 | 0     | 0     | 0 | 0     | 0    | 1 | 1 | 1 | 1 |
| GO:0000398 | 49  | 47  | 95.92 | 1.09 | 1 | 2.04  | 0.58  | 0 | 0     | 0     | 1 | 2.04  | 0.58 | 1 | 1 | 1 | 1 |
| GO:0000502 | 6   | 6   | 100   | 1.13 | 0 | 0     | 0     | 0 | 0     | 0     | 0 | 0     | 0    | 1 | 1 | 1 | 1 |
| GO:0000702 | 3   | 1   | 33.33 | 0.38 | 1 | 33.33 | 9.54  | 1 | 33.33 | 7.18  | 0 | 0     | 0    | 1 | 1 | 1 | 1 |
| GO:0000723 | 5   | 5   | 100   | 1.13 | 0 | 0     | 0     | 0 | 0     | 0     | 0 | 0     | 0    | 1 | 1 | 1 | 1 |
| GO:0000775 | 3   | 3   | 100   | 1.13 | 0 | 0     | 0     | 0 | 0     | 0     | 0 | 0     | 0    | 1 | 1 | 1 | 1 |
| GO:0000781 | 6   | 6   | 100   | 1.13 | 0 | 0     | 0     | 0 | 0     | 0     | 0 | 0     | 0    | 1 | 1 | 1 | 1 |
| GO:0000785 | 30  | 27  | 90    | 1.02 | 0 | 0     | 0     | 3 | 10    | 2.15  | 0 | 0     | 0    | 1 | 1 | 1 | 1 |
| GO:0000786 | 19  | 14  | 73.68 | 0.83 | 0 | 0     | 0     | 3 | 15.79 | 3.4   | 2 | 10.53 | 2.97 | 1 | 1 | 1 | 1 |
| GO:0000790 | 2   | 2   | 100   | 1.13 | 0 | 0     | 0     | 0 | 0     | 0     | 0 | 0     | 0    | 1 | 1 | 1 | 1 |
| GO:0000793 | 15  | 15  | 100   | 1.13 | 0 | 0     | 0     | 0 | 0     | 0     | 0 | 0     | 0    | 1 | 1 | 1 | 1 |
| GO:0000794 | 2   | 2   | 100   | 1.13 | 0 | 0     | 0     | 0 | 0     | 0     | 0 | 0     | 0    | 1 | 1 | 1 | 1 |
| GO:0000795 | 2   | 2   | 100   | 1.13 | 0 | 0     | 0     | 0 | 0     | 0     | 0 | 0     | 0    | 1 | 1 | 1 | 1 |
| GO:0000800 | 1   | 1   | 100   | 1.13 | 0 | 0     | 0     | 0 | 0     | 0     | 0 | 0     | 0    | 1 | 1 | 1 | 1 |
| GO:0000808 | 1   | 1   | 100   | 1.13 | 0 | 0     | 0     | 0 | 0     | 0     | 0 | 0     | 0    | 1 | 1 | 1 | 1 |
| GO:0000902 | 16  | 15  | 93.75 | 1.06 | 0 | 0     | 0     | 1 | 6.25  | 1.35  | 0 | 0     | 0    | 1 | 1 | 1 | 1 |
| GO:0000904 | 4   | 1   | 25    | 0.28 | 0 | 0     | 0     | 3 | 75    | 16.15 | 0 | 0     | 0    | 1 | 1 | 1 | 1 |
| GO:0000910 | 102 | 100 | 98.04 | 1.11 | 0 | 0     | 0     | 2 | 1.96  | 0.42  | 0 | 0     | 0    | 1 | 1 | 1 | 1 |
| GO:0001501 | 44  | 38  | 86.36 | 0.98 | 1 | 2.27  | 0.65  | 4 | 9.09  | 1.96  | 1 | 2.27  | 0.64 | 1 | 1 | 1 | 1 |
| GO:0001502 | 8   | 7   | 87.5  | 0.99 | 0 | 0     | 0     | 1 | 12.5  | 2.69  | 0 | 0     | 0    | 1 | 1 | 1 | 1 |

|            |    |    |       |      |   |       |       |   |       |       |   |       |       |   |          |   |   |
|------------|----|----|-------|------|---|-------|-------|---|-------|-------|---|-------|-------|---|----------|---|---|
| GO:0001503 | 33 | 28 | 84.85 | 0.96 | 0 | 0     | 0     | 3 | 9.09  | 1.96  | 2 | 6.06  | 1.71  | 1 | 1        | 1 | 1 |
| GO:0001504 | 4  | 3  | 75    | 0.85 | 0 | 0     | 0     | 1 | 25    | 5.38  | 0 | 0     | 0     | 1 | 1        | 1 | 1 |
| GO:0001506 | 2  | 2  | 100   | 1.13 | 0 | 0     | 0     | 0 | 0     | 0     | 0 | 0     | 0     | 1 | 1        | 1 | 1 |
| GO:0001508 | 1  | 1  | 100   | 1.13 | 0 | 0     | 0     | 0 | 0     | 0     | 0 | 0     | 0     | 1 | 1        | 1 | 1 |
| GO:0001509 | 6  | 6  | 100   | 1.13 | 0 | 0     | 0     | 0 | 0     | 0     | 0 | 0     | 0     | 1 | 1        | 1 | 1 |
| GO:0001510 | 1  | 1  | 100   | 1.13 | 0 | 0     | 0     | 0 | 0     | 0     | 0 | 0     | 0     | 1 | 1        | 1 | 1 |
| GO:0001516 | 10 | 9  | 90    | 1.02 | 0 | 0     | 0     | 0 | 0     | 0     | 1 | 10    | 2.82  | 1 | 1        | 1 | 1 |
| GO:0001517 | 1  | 1  | 100   | 1.13 | 0 | 0     | 0     | 0 | 0     | 0     | 0 | 0     | 0     | 1 | 1        | 1 | 1 |
| GO:0001523 | 6  | 4  | 66.67 | 0.75 | 1 | 16.67 | 4.77  | 1 | 16.67 | 3.59  | 0 | 0     | 0     | 1 | 1        | 1 | 1 |
| GO:0001524 | 11 | 2  | 18.18 | 0.21 | 8 | 72.73 | 20.82 | 0 | 0     | 0     | 1 | 9.09  | 2.57  | 1 | 1.74E-06 | 1 | 1 |
| GO:0001525 | 30 | 25 | 83.33 | 0.94 | 3 | 10    | 2.86  | 2 | 6.67  | 1.44  | 0 | 0     | 0     | 1 | 1        | 1 | 1 |
| GO:0001527 | 5  | 4  | 80    | 0.91 | 0 | 0     | 0     | 1 | 20    | 4.31  | 0 | 0     | 0     | 1 | 1        | 1 | 1 |
| GO:0001533 | 7  | 1  | 14.29 | 0.16 | 2 | 28.57 | 8.18  | 1 | 14.29 | 3.08  | 3 | 42.86 | 12.1  | 1 | 1        | 1 | 1 |
| GO:0001537 | 2  | 2  | 100   | 1.13 | 0 | 0     | 0     | 0 | 0     | 0     | 0 | 0     | 0     | 1 | 1        | 1 | 1 |
| GO:0001540 | 2  | 2  | 100   | 1.13 | 0 | 0     | 0     | 0 | 0     | 0     | 0 | 0     | 0     | 1 | 1        | 1 | 1 |
| GO:0001542 | 4  | 4  | 100   | 1.13 | 0 | 0     | 0     | 0 | 0     | 0     | 0 | 0     | 0     | 1 | 1        | 1 | 1 |
| GO:0001544 | 1  | 1  | 100   | 1.13 | 0 | 0     | 0     | 0 | 0     | 0     | 0 | 0     | 0     | 1 | 1        | 1 | 1 |
| GO:0001556 | 1  | 1  | 100   | 1.13 | 0 | 0     | 0     | 0 | 0     | 0     | 0 | 0     | 0     | 1 | 1        | 1 | 1 |
| GO:0001558 | 41 | 38 | 92.68 | 1.05 | 2 | 4.88  | 1.4   | 0 | 0     | 0     | 1 | 2.44  | 0.69  | 1 | 1        | 1 | 1 |
| GO:0001560 | 1  | 1  | 100   | 1.13 | 0 | 0     | 0     | 0 | 0     | 0     | 0 | 0     | 0     | 1 | 1        | 1 | 1 |
| GO:0001561 | 5  | 5  | 100   | 1.13 | 0 | 0     | 0     | 0 | 0     | 0     | 0 | 0     | 0     | 1 | 1        | 1 | 1 |
| GO:0001568 | 9  | 7  | 77.78 | 0.88 | 0 | 0     | 0     | 1 | 11.11 | 2.39  | 1 | 11.11 | 3.14  | 1 | 1        | 1 | 1 |
| GO:0001569 | 2  | 2  | 100   | 1.13 | 0 | 0     | 0     | 0 | 0     | 0     | 0 | 0     | 0     | 1 | 1        | 1 | 1 |
| GO:0001570 | 2  | 2  | 100   | 1.13 | 0 | 0     | 0     | 0 | 0     | 0     | 0 | 0     | 0     | 1 | 1        | 1 | 1 |
| GO:0001578 | 1  | 1  | 100   | 1.13 | 0 | 0     | 0     | 0 | 0     | 0     | 0 | 0     | 0     | 1 | 1        | 1 | 1 |
| GO:0001584 | 71 | 53 | 74.65 | 0.85 | 7 | 9.86  | 2.82  | 5 | 7.04  | 1.52  | 6 | 8.45  | 2.39  | 1 | 1        | 1 | 1 |
| GO:0001601 | 1  | 0  | 0     | 0    | 1 | 100   | 28.63 | 0 | 0     | 0     | 0 | 0     | 0     | 1 | 1        | 1 | 1 |
| GO:0001602 | 1  | 0  | 0     | 0    | 1 | 100   | 28.63 | 0 | 0     | 0     | 0 | 0     | 0     | 1 | 1        | 1 | 1 |
| GO:0001614 | 2  | 0  | 0     | 0    | 0 | 0     | 0     | 2 | 100   | 21.53 | 0 | 0     | 0     | 1 | 1        | 1 | 1 |
| GO:0001619 | 7  | 7  | 100   | 1.13 | 0 | 0     | 0     | 0 | 0     | 0     | 0 | 0     | 0     | 1 | 1        | 1 | 1 |
| GO:0001650 | 3  | 3  | 100   | 1.13 | 0 | 0     | 0     | 0 | 0     | 0     | 0 | 0     | 0     | 1 | 1        | 1 | 1 |
| GO:0001651 | 1  | 1  | 100   | 1.13 | 0 | 0     | 0     | 0 | 0     | 0     | 0 | 0     | 0     | 1 | 1        | 1 | 1 |
| GO:0001654 | 2  | 1  | 50    | 0.57 | 0 | 0     | 0     | 0 | 0     | 0     | 1 | 50    | 14.11 | 1 | 1        | 1 | 1 |
| GO:0001655 | 2  | 2  | 100   | 1.13 | 0 | 0     | 0     | 0 | 0     | 0     | 0 | 0     | 0     | 1 | 1        | 1 | 1 |
| GO:0001656 | 3  | 3  | 100   | 1.13 | 0 | 0     | 0     | 0 | 0     | 0     | 0 | 0     | 0     | 1 | 1        | 1 | 1 |
| GO:0001657 | 3  | 3  | 100   | 1.13 | 0 | 0     | 0     | 0 | 0     | 0     | 0 | 0     | 0     | 1 | 1        | 1 | 1 |
| GO:0001658 | 1  | 1  | 100   | 1.13 | 0 | 0     | 0     | 0 | 0     | 0     | 0 | 0     | 0     | 1 | 1        | 1 | 1 |
| GO:0001662 | 15 | 14 | 93.33 | 1.06 | 0 | 0     | 0     | 1 | 6.67  | 1.44  | 0 | 0     | 0     | 1 | 1        | 1 | 1 |
| GO:0001664 | 2  | 2  | 100   | 1.13 | 0 | 0     | 0     | 0 | 0     | 0     | 0 | 0     | 0     | 1 | 1        | 1 | 1 |
| GO:0001666 | 4  | 4  | 100   | 1.13 | 0 | 0     | 0     | 0 | 0     | 0     | 0 | 0     | 0     | 1 | 1        | 1 | 1 |
| GO:0001667 | 2  | 2  | 100   | 1.13 | 0 | 0     | 0     | 0 | 0     | 0     | 0 | 0     | 0     | 1 | 1        | 1 | 1 |

|            |      |      |       |      |    |      |       |    |       |       |    |       |       |             |   |            |             |
|------------|------|------|-------|------|----|------|-------|----|-------|-------|----|-------|-------|-------------|---|------------|-------------|
| GO:0001668 | 1    | 1    | 100   | 1.13 | 0  | 0    | 0     | 0  | 0     | 0     | 0  | 0     | 0     | 1           | 1 | 1          | 1           |
| GO:0001669 | 1    | 1    | 100   | 1.13 | 0  | 0    | 0     | 0  | 0     | 0     | 0  | 0     | 0     | 1           | 1 | 1          | 1           |
| GO:0001671 | 3    | 3    | 100   | 1.13 | 0  | 0    | 0     | 0  | 0     | 0     | 0  | 0     | 0     | 1           | 1 | 1          | 1           |
| GO:0001674 | 1    | 1    | 100   | 1.13 | 0  | 0    | 0     | 0  | 0     | 0     | 0  | 0     | 0     | 1           | 1 | 1          | 1           |
| GO:0001675 | 10   | 10   | 100   | 1.13 | 0  | 0    | 0     | 0  | 0     | 0     | 0  | 0     | 0     | 1           | 1 | 1          | 1           |
| GO:0001701 | 8    | 5    | 62.5  | 0.71 | 0  | 0    | 0     | 3  | 37.5  | 8.07  | 0  | 0     | 0     | 1           | 1 | 1          | 1           |
| GO:0001707 | 8    | 8    | 100   | 1.13 | 0  | 0    | 0     | 0  | 0     | 0     | 0  | 0     | 0     | 1           | 1 | 1          | 1           |
| GO:0001709 | 4    | 0    | 0     | 0    | 2  | 50   | 14.32 | 2  | 50    | 10.76 | 0  | 0     | 0     | 1           | 1 | 1          | 1           |
| GO:0001719 | 1    | 1    | 100   | 1.13 | 0  | 0    | 0     | 0  | 0     | 0     | 0  | 0     | 0     | 1           | 1 | 1          | 1           |
| GO:0001725 | 4    | 2    | 50    | 0.57 | 1  | 25   | 7.16  | 0  | 0     | 0     | 1  | 25    | 7.06  | 1           | 1 | 1          | 1           |
| GO:0001726 | 17   | 16   | 94.12 | 1.07 | 0  | 0    | 0     | 1  | 5.88  | 1.27  | 0  | 0     | 0     | 1           | 1 | 1          | 1           |
| GO:0001729 | 1    | 1    | 100   | 1.13 | 0  | 0    | 0     | 0  | 0     | 0     | 0  | 0     | 0     | 1           | 1 | 1          | 1           |
| GO:0001730 | 1    | 0    | 0     | 0    | 0  | 0    | 0     | 1  | 100   | 21.53 | 0  | 0     | 0     | 1           | 1 | 1          | 1           |
| GO:0001734 | 1    | 1    | 100   | 1.13 | 0  | 0    | 0     | 0  | 0     | 0     | 0  | 0     | 0     | 1           | 1 | 1          | 1           |
| GO:0001735 | 3    | 3    | 100   | 1.13 | 0  | 0    | 0     | 0  | 0     | 0     | 0  | 0     | 0     | 1           | 1 | 1          | 1           |
| GO:0001756 | 3    | 3    | 100   | 1.13 | 0  | 0    | 0     | 0  | 0     | 0     | 0  | 0     | 0     | 1           | 1 | 1          | 1           |
| GO:0001757 | 1    | 0    | 0     | 0    | 1  | 100  | 28.63 | 0  | 0     | 0     | 0  | 0     | 0     | 1           | 1 | 1          | 1           |
| GO:0001763 | 2    | 2    | 100   | 1.13 | 0  | 0    | 0     | 0  | 0     | 0     | 0  | 0     | 0     | 1           | 1 | 1          | 1           |
| GO:0001764 | 2    | 2    | 100   | 1.13 | 0  | 0    | 0     | 0  | 0     | 0     | 0  | 0     | 0     | 1           | 1 | 1          | 1           |
| GO:0001779 | 1    | 1    | 100   | 1.13 | 0  | 0    | 0     | 0  | 0     | 0     | 0  | 0     | 0     | 1           | 1 | 1          | 1           |
| GO:0001781 | 1    | 0    | 0     | 0    | 0  | 0    | 0     | 1  | 100   | 21.53 | 0  | 0     | 0     | 1           | 1 | 1          | 1           |
| GO:0001782 | 7    | 6    | 85.71 | 0.97 | 0  | 0    | 0     | 1  | 14.29 | 3.08  | 0  | 0     | 0     | 1           | 1 | 1          | 1           |
| GO:0001784 | 2    | 2    | 100   | 1.13 | 0  | 0    | 0     | 0  | 0     | 0     | 0  | 0     | 0     | 1           | 1 | 1          | 1           |
| GO:0001786 | 3    | 3    | 100   | 1.13 | 0  | 0    | 0     | 0  | 0     | 0     | 0  | 0     | 0     | 1           | 1 | 1          | 1           |
| GO:0001788 | 3    | 0    | 0     | 0    | 0  | 0    | 0     | 0  | 0     | 0     | 3  | 100   | 28.22 | 1           | 1 | 1          | 0.21002992  |
| GO:0001798 | 4    | 1    | 25    | 0.28 | 0  | 0    | 0     | 0  | 0     | 0     | 3  | 75    | 21.17 | 1           | 1 | 1          | 0.815577835 |
| GO:0001805 | 4    | 1    | 25    | 0.28 | 0  | 0    | 0     | 0  | 0     | 0     | 3  | 75    | 21.17 | 1           | 1 | 1          | 0.815577835 |
| GO:0001811 | 3    | 0    | 0     | 0    | 0  | 0    | 0     | 3  | 100   | 21.53 | 0  | 0     | 0     | 1           | 1 | 0.43202791 | 1           |
| GO:0001812 | 3    | 0    | 0     | 0    | 0  | 0    | 0     | 0  | 0     | 0     | 3  | 100   | 28.22 | 1           | 1 | 1          | 0.21002992  |
| GO:0001820 | 3    | 0    | 0     | 0    | 0  | 0    | 0     | 0  | 0     | 0     | 3  | 100   | 28.22 | 1           | 1 | 1          | 0.21002992  |
| GO:0001836 | 1    | 1    | 100   | 1.13 | 0  | 0    | 0     | 0  | 0     | 0     | 0  | 0     | 0     | 1           | 1 | 1          | 1           |
| GO:0001837 | 3    | 2    | 66.67 | 0.75 | 0  | 0    | 0     | 0  | 0     | 0     | 1  | 33.33 | 9.41  | 1           | 1 | 1          | 1           |
| GO:0001843 | 1    | 1    | 100   | 1.13 | 0  | 0    | 0     | 0  | 0     | 0     | 0  | 0     | 0     | 1           | 1 | 1          | 1           |
| GO:0001844 | 1    | 1    | 100   | 1.13 | 0  | 0    | 0     | 0  | 0     | 0     | 0  | 0     | 0     | 1           | 1 | 1          | 1           |
| GO:0002009 | 1    | 0    | 0     | 0    | 0  | 0    | 0     | 0  | 0     | 0     | 1  | 100   | 28.22 | 1           | 1 | 1          | 1           |
| GO:0002011 | 5    | 5    | 100   | 1.13 | 0  | 0    | 0     | 0  | 0     | 0     | 0  | 0     | 0     | 1           | 1 | 1          | 1           |
| GO:0003674 | 1    | 1    | 100   | 1.13 | 0  | 0    | 0     | 0  | 0     | 0     | 0  | 0     | 0     | 1           | 1 | 1          | 1           |
| GO:0003676 | 1030 | 913  | 88.64 | 1    | 56 | 5.44 | 1.56  | 43 | 4.17  | 0.9   | 18 | 1.75  | 0.49  | 1           | 1 | 1          | 1           |
| GO:0003677 | 1730 | 1571 | 90.81 | 1.03 | 59 | 3.41 | 0.98  | 66 | 3.82  | 0.82  | 34 | 1.97  | 0.55  | 0.016366804 | 1 | 1          | 1           |
| GO:0003678 | 73   | 68   | 93.15 | 1.05 | 4  | 5.48 | 1.57  | 0  | 0     | 0     | 1  | 1.37  | 0.39  | 1           | 1 | 1          | 1           |
| GO:0003682 | 58   | 51   | 87.93 | 1    | 3  | 5.17 | 1.48  | 4  | 6.9   | 1.48  | 0  | 0     | 0     | 1           | 1 | 1          | 1           |

|            |     |     |       |      |    |       |      |    |       |      |    |       |      |             |   |   |   |
|------------|-----|-----|-------|------|----|-------|------|----|-------|------|----|-------|------|-------------|---|---|---|
| GO:0003683 | 1   | 1   | 100   | 1.13 | 0  | 0     | 0    | 0  | 0     | 0    | 0  | 0     | 0    | 1           | 1 | 1 | 1 |
| GO:0003684 | 16  | 16  | 100   | 1.13 | 0  | 0     | 0    | 0  | 0     | 0    | 0  | 0     | 0    | 1           | 1 | 1 | 1 |
| GO:0003685 | 24  | 24  | 100   | 1.13 | 0  | 0     | 0    | 0  | 0     | 0    | 0  | 0     | 0    | 1           | 1 | 1 | 1 |
| GO:0003686 | 3   | 3   | 100   | 1.13 | 0  | 0     | 0    | 0  | 0     | 0    | 0  | 0     | 0    | 1           | 1 | 1 | 1 |
| GO:0003687 | 7   | 7   | 100   | 1.13 | 0  | 0     | 0    | 0  | 0     | 0    | 0  | 0     | 0    | 1           | 1 | 1 | 1 |
| GO:0003688 | 3   | 3   | 100   | 1.13 | 0  | 0     | 0    | 0  | 0     | 0    | 0  | 0     | 0    | 1           | 1 | 1 | 1 |
| GO:0003690 | 24  | 20  | 83.33 | 0.94 | 4  | 16.67 | 4.77 | 0  | 0     | 0    | 0  | 0     | 0    | 1           | 1 | 1 | 1 |
| GO:0003697 | 26  | 20  | 76.92 | 0.87 | 4  | 15.38 | 4.41 | 2  | 7.69  | 1.66 | 0  | 0     | 0    | 1           | 1 | 1 | 1 |
| GO:0003700 | 744 | 649 | 87.23 | 0.99 | 33 | 4.44  | 1.27 | 40 | 5.38  | 1.16 | 22 | 2.96  | 0.83 | 1           | 1 | 1 | 1 |
| GO:0003701 | 1   | 1   | 100   | 1.13 | 0  | 0     | 0    | 0  | 0     | 0    | 0  | 0     | 0    | 1           | 1 | 1 | 1 |
| GO:0003702 | 87  | 82  | 94.25 | 1.07 | 4  | 4.6   | 1.32 | 0  | 0     | 0    | 1  | 1.15  | 0.32 | 1           | 1 | 1 | 1 |
| GO:0003704 | 12  | 9   | 75    | 0.85 | 1  | 8.33  | 2.39 | 2  | 16.67 | 3.59 | 0  | 0     | 0    | 1           | 1 | 1 | 1 |
| GO:0003705 | 7   | 7   | 100   | 1.13 | 0  | 0     | 0    | 0  | 0     | 0    | 0  | 0     | 0    | 1           | 1 | 1 | 1 |
| GO:0003707 | 38  | 31  | 81.58 | 0.92 | 2  | 5.26  | 1.51 | 2  | 5.26  | 1.13 | 3  | 7.89  | 2.23 | 1           | 1 | 1 | 1 |
| GO:0003708 | 3   | 3   | 100   | 1.13 | 0  | 0     | 0    | 0  | 0     | 0    | 0  | 0     | 0    | 1           | 1 | 1 | 1 |
| GO:0003709 | 5   | 3   | 60    | 0.68 | 1  | 20    | 5.73 | 1  | 20    | 4.31 | 0  | 0     | 0    | 1           | 1 | 1 | 1 |
| GO:0003711 | 6   | 6   | 100   | 1.13 | 0  | 0     | 0    | 0  | 0     | 0    | 0  | 0     | 0    | 1           | 1 | 1 | 1 |
| GO:0003712 | 21  | 20  | 95.24 | 1.08 | 1  | 4.76  | 1.36 | 0  | 0     | 0    | 0  | 0     | 0    | 1           | 1 | 1 | 1 |
| GO:0003713 | 93  | 84  | 90.32 | 1.02 | 5  | 5.38  | 1.54 | 3  | 3.23  | 0.69 | 1  | 1.08  | 0.3  | 1           | 1 | 1 | 1 |
| GO:0003714 | 66  | 56  | 84.85 | 0.96 | 5  | 7.58  | 2.17 | 3  | 4.55  | 0.98 | 2  | 3.03  | 0.86 | 1           | 1 | 1 | 1 |
| GO:0003716 | 1   | 1   | 100   | 1.13 | 0  | 0     | 0    | 0  | 0     | 0    | 0  | 0     | 0    | 1           | 1 | 1 | 1 |
| GO:0003717 | 1   | 1   | 100   | 1.13 | 0  | 0     | 0    | 0  | 0     | 0    | 0  | 0     | 0    | 1           | 1 | 1 | 1 |
| GO:0003719 | 5   | 5   | 100   | 1.13 | 0  | 0     | 0    | 0  | 0     | 0    | 0  | 0     | 0    | 1           | 1 | 1 | 1 |
| GO:0003721 | 1   | 1   | 100   | 1.13 | 0  | 0     | 0    | 0  | 0     | 0    | 0  | 0     | 0    | 1           | 1 | 1 | 1 |
| GO:0003723 | 645 | 598 | 92.71 | 1.05 | 30 | 4.65  | 1.33 | 9  | 1.4   | 0.3  | 8  | 1.24  | 0.35 | 0.033847102 | 1 | 1 | 1 |
| GO:0003724 | 30  | 28  | 93.33 | 1.06 | 0  | 0     | 0    | 0  | 0     | 0    | 2  | 6.67  | 1.88 | 1           | 1 | 1 | 1 |
| GO:0003725 | 29  | 27  | 93.1  | 1.05 | 0  | 0     | 0    | 1  | 3.45  | 0.74 | 1  | 3.45  | 0.97 | 1           | 1 | 1 | 1 |
| GO:0003726 | 3   | 3   | 100   | 1.13 | 0  | 0     | 0    | 0  | 0     | 0    | 0  | 0     | 0    | 1           | 1 | 1 | 1 |
| GO:0003727 | 11  | 10  | 90.91 | 1.03 | 0  | 0     | 0    | 0  | 0     | 0    | 1  | 9.09  | 2.57 | 1           | 1 | 1 | 1 |
| GO:0003729 | 11  | 10  | 90.91 | 1.03 | 1  | 9.09  | 2.6  | 0  | 0     | 0    | 0  | 0     | 0    | 1           | 1 | 1 | 1 |
| GO:0003730 | 6   | 5   | 83.33 | 0.94 | 0  | 0     | 0    | 0  | 0     | 0    | 1  | 16.67 | 4.7  | 1           | 1 | 1 | 1 |
| GO:0003731 | 5   | 5   | 100   | 1.13 | 0  | 0     | 0    | 0  | 0     | 0    | 0  | 0     | 0    | 1           | 1 | 1 | 1 |
| GO:0003732 | 2   | 2   | 100   | 1.13 | 0  | 0     | 0    | 0  | 0     | 0    | 0  | 0     | 0    | 1           | 1 | 1 | 1 |
| GO:0003733 | 57  | 57  | 100   | 1.13 | 0  | 0     | 0    | 0  | 0     | 0    | 0  | 0     | 0    | 1           | 1 | 1 | 1 |
| GO:0003734 | 42  | 41  | 97.62 | 1.11 | 0  | 0     | 0    | 1  | 2.38  | 0.51 | 0  | 0     | 0    | 1           | 1 | 1 | 1 |
| GO:0003735 | 343 | 306 | 89.21 | 1.01 | 10 | 2.92  | 0.83 | 24 | 7     | 1.51 | 3  | 0.87  | 0.25 | 1           | 1 | 1 | 1 |
| GO:0003743 | 146 | 137 | 93.84 | 1.06 | 2  | 1.37  | 0.39 | 5  | 3.42  | 0.74 | 2  | 1.37  | 0.39 | 1           | 1 | 1 | 1 |
| GO:0003746 | 57  | 56  | 98.25 | 1.11 | 0  | 0     | 0    | 1  | 1.75  | 0.38 | 0  | 0     | 0    | 1           | 1 | 1 | 1 |
| GO:0003747 | 10  | 8   | 80    | 0.91 | 0  | 0     | 0    | 1  | 10    | 2.15 | 1  | 10    | 2.82 | 1           | 1 | 1 | 1 |
| GO:0003750 | 70  | 66  | 94.29 | 1.07 | 1  | 1.43  | 0.41 | 1  | 1.43  | 0.31 | 2  | 2.86  | 0.81 | 1           | 1 | 1 | 1 |
| GO:0003751 | 23  | 23  | 100   | 1.13 | 0  | 0     | 0    | 0  | 0     | 0    | 0  | 0     | 0    | 1           | 1 | 1 | 1 |

|            |     |     |       |      |   |      |       |    |       |       |   |       |       |   |   |   |             |
|------------|-----|-----|-------|------|---|------|-------|----|-------|-------|---|-------|-------|---|---|---|-------------|
| GO:0003752 | 3   | 3   | 100   | 1.13 | 0 | 0    | 0     | 0  | 0     | 0     | 0 | 0     | 1     | 1 | 1 | 1 |             |
| GO:0003754 | 257 | 238 | 92.61 | 1.05 | 3 | 1.17 | 0.33  | 13 | 5.06  | 1.09  | 3 | 1.17  | 0.33  | 1 | 1 | 1 | 1           |
| GO:0003755 | 64  | 61  | 95.31 | 1.08 | 0 | 0    | 0     | 1  | 1.56  | 0.34  | 2 | 3.13  | 0.88  | 1 | 1 | 1 | 1           |
| GO:0003756 | 10  | 10  | 100   | 1.13 | 0 | 0    | 0     | 0  | 0     | 0     | 0 | 0     | 0     | 1 | 1 | 1 | 1           |
| GO:0003762 | 1   | 1   | 100   | 1.13 | 0 | 0    | 0     | 0  | 0     | 0     | 0 | 0     | 0     | 1 | 1 | 1 | 1           |
| GO:0003763 | 1   | 1   | 100   | 1.13 | 0 | 0    | 0     | 0  | 0     | 0     | 0 | 0     | 0     | 1 | 1 | 1 | 1           |
| GO:0003767 | 15  | 15  | 100   | 1.13 | 0 | 0    | 0     | 0  | 0     | 0     | 0 | 0     | 0     | 1 | 1 | 1 | 1           |
| GO:0003772 | 7   | 7   | 100   | 1.13 | 0 | 0    | 0     | 0  | 0     | 0     | 0 | 0     | 0     | 1 | 1 | 1 | 1           |
| GO:0003773 | 70  | 65  | 92.86 | 1.05 | 3 | 4.29 | 1.23  | 1  | 1.43  | 0.31  | 1 | 1.43  | 0.4   | 1 | 1 | 1 | 1           |
| GO:0003774 | 135 | 130 | 96.3  | 1.09 | 3 | 2.22 | 0.64  | 2  | 1.48  | 0.32  | 0 | 0     | 0     | 1 | 1 | 1 | 1           |
| GO:0003777 | 39  | 38  | 97.44 | 1.1  | 1 | 2.56 | 0.73  | 0  | 0     | 0     | 0 | 0     | 0     | 1 | 1 | 1 | 1           |
| GO:0003778 | 3   | 3   | 100   | 1.13 | 0 | 0    | 0     | 0  | 0     | 0     | 0 | 0     | 0     | 1 | 1 | 1 | 1           |
| GO:0003779 | 255 | 232 | 90.98 | 1.03 | 6 | 2.35 | 0.67  | 14 | 5.49  | 1.18  | 3 | 1.18  | 0.33  | 1 | 1 | 1 | 1           |
| GO:0003780 | 1   | 1   | 100   | 1.13 | 0 | 0    | 0     | 0  | 0     | 0     | 0 | 0     | 0     | 1 | 1 | 1 | 1           |
| GO:0003782 | 9   | 8   | 88.89 | 1.01 | 0 | 0    | 0     | 0  | 0     | 0     | 1 | 11.11 | 3.14  | 1 | 1 | 1 | 1           |
| GO:0003784 | 1   | 1   | 100   | 1.13 | 0 | 0    | 0     | 0  | 0     | 0     | 0 | 0     | 0     | 1 | 1 | 1 | 1           |
| GO:0003789 | 2   | 2   | 100   | 1.13 | 0 | 0    | 0     | 0  | 0     | 0     | 0 | 0     | 0     | 1 | 1 | 1 | 1           |
| GO:0003790 | 5   | 5   | 100   | 1.13 | 0 | 0    | 0     | 0  | 0     | 0     | 0 | 0     | 0     | 1 | 1 | 1 | 1           |
| GO:0003791 | 1   | 1   | 100   | 1.13 | 0 | 0    | 0     | 0  | 0     | 0     | 0 | 0     | 0     | 1 | 1 | 1 | 1           |
| GO:0003792 | 1   | 0   | 0     | 0    | 1 | 100  | 28.63 | 0  | 0     | 0     | 0 | 0     | 0     | 1 | 1 | 1 | 1           |
| GO:0003793 | 22  | 13  | 59.09 | 0.67 | 2 | 9.09 | 2.6   | 5  | 22.73 | 4.89  | 2 | 9.09  | 2.57  | 1 | 1 | 1 | 1           |
| GO:0003794 | 1   | 0   | 0     | 0    | 1 | 100  | 28.63 | 0  | 0     | 0     | 0 | 0     | 0     | 1 | 1 | 1 | 1           |
| GO:0003795 | 2   | 0   | 0     | 0    | 0 | 0    | 0     | 1  | 50    | 10.76 | 1 | 50    | 14.11 | 1 | 1 | 1 | 1           |
| GO:0003796 | 1   | 1   | 100   | 1.13 | 0 | 0    | 0     | 0  | 0     | 0     | 0 | 0     | 0     | 1 | 1 | 1 | 1           |
| GO:0003797 | 4   | 1   | 25    | 0.28 | 0 | 0    | 0     | 0  | 0     | 0     | 3 | 75    | 21.17 | 1 | 1 | 1 | 0.815577835 |
| GO:0003800 | 5   | 4   | 80    | 0.91 | 0 | 0    | 0     | 1  | 20    | 4.31  | 0 | 0     | 0     | 1 | 1 | 1 | 1           |
| GO:0003802 | 4   | 4   | 100   | 1.13 | 0 | 0    | 0     | 0  | 0     | 0     | 0 | 0     | 0     | 1 | 1 | 1 | 1           |
| GO:0003803 | 1   | 0   | 0     | 0    | 0 | 0    | 0     | 0  | 0     | 0     | 1 | 100   | 28.22 | 1 | 1 | 1 | 1           |
| GO:0003805 | 1   | 0   | 0     | 0    | 0 | 0    | 0     | 0  | 0     | 0     | 1 | 100   | 28.22 | 1 | 1 | 1 | 1           |
| GO:0003807 | 1   | 1   | 100   | 1.13 | 0 | 0    | 0     | 0  | 0     | 0     | 0 | 0     | 0     | 1 | 1 | 1 | 1           |
| GO:0003809 | 5   | 3   | 60    | 0.68 | 0 | 0    | 0     | 1  | 20    | 4.31  | 1 | 20    | 5.64  | 1 | 1 | 1 | 1           |
| GO:0003810 | 9   | 8   | 88.89 | 1.01 | 0 | 0    | 0     | 0  | 0     | 0     | 1 | 11.11 | 3.14  | 1 | 1 | 1 | 1           |
| GO:0003811 | 10  | 3   | 30    | 0.34 | 1 | 10   | 2.86  | 0  | 0     | 0     | 6 | 60    | 16.93 | 1 | 1 | 1 | 0.002271866 |
| GO:0003812 | 3   | 3   | 100   | 1.13 | 0 | 0    | 0     | 0  | 0     | 0     | 0 | 0     | 0     | 1 | 1 | 1 | 1           |
| GO:0003813 | 1   | 1   | 100   | 1.13 | 0 | 0    | 0     | 0  | 0     | 0     | 0 | 0     | 0     | 1 | 1 | 1 | 1           |
| GO:0003817 | 1   | 1   | 100   | 1.13 | 0 | 0    | 0     | 0  | 0     | 0     | 0 | 0     | 0     | 1 | 1 | 1 | 1           |
| GO:0003819 | 11  | 8   | 72.73 | 0.82 | 1 | 9.09 | 2.6   | 2  | 18.18 | 3.91  | 0 | 0     | 0     | 1 | 1 | 1 | 1           |
| GO:0003820 | 4   | 4   | 100   | 1.13 | 0 | 0    | 0     | 0  | 0     | 0     | 0 | 0     | 0     | 1 | 1 | 1 | 1           |
| GO:0003821 | 3   | 1   | 33.33 | 0.38 | 0 | 0    | 0     | 2  | 66.67 | 14.35 | 0 | 0     | 0     | 1 | 1 | 1 | 1           |
| GO:0003822 | 4   | 3   | 75    | 0.85 | 1 | 25   | 7.16  | 0  | 0     | 0     | 0 | 0     | 0     | 1 | 1 | 1 | 1           |
| GO:0003823 | 23  | 11  | 47.83 | 0.54 | 2 | 8.7  | 2.49  | 6  | 26.09 | 5.62  | 4 | 17.39 | 4.91  | 1 | 1 | 1 | 1           |

|            |     |     |       |      |   |       |       |    |       |       |    |       |       |   |   |   |   |
|------------|-----|-----|-------|------|---|-------|-------|----|-------|-------|----|-------|-------|---|---|---|---|
| GO:0003824 | 637 | 583 | 91.52 | 1.04 | 8 | 1.26  | 0.36  | 28 | 4.4   | 0.95  | 18 | 2.83  | 0.8   | 1 | 1 | 1 | 1 |
| GO:0003826 | 1   | 1   | 100   | 1.13 | 0 | 0     | 0     | 0  | 0     | 0     | 0  | 0     | 0     | 1 | 1 | 1 | 1 |
| GO:0003827 | 3   | 2   | 66.67 | 0.75 | 0 | 0     | 0     | 1  | 33.33 | 7.18  | 0  | 0     | 0     | 1 | 1 | 1 | 1 |
| GO:0003828 | 5   | 5   | 100   | 1.13 | 0 | 0     | 0     | 0  | 0     | 0     | 0  | 0     | 0     | 1 | 1 | 1 | 1 |
| GO:0003829 | 1   | 1   | 100   | 1.13 | 0 | 0     | 0     | 0  | 0     | 0     | 0  | 0     | 0     | 1 | 1 | 1 | 1 |
| GO:0003830 | 1   | 1   | 100   | 1.13 | 0 | 0     | 0     | 0  | 0     | 0     | 0  | 0     | 0     | 1 | 1 | 1 | 1 |
| GO:0003834 | 1   | 0   | 0     | 0    | 0 | 0     | 0     | 1  | 100   | 21.53 | 0  | 0     | 0     | 1 | 1 | 1 | 1 |
| GO:0003835 | 1   | 1   | 100   | 1.13 | 0 | 0     | 0     | 0  | 0     | 0     | 0  | 0     | 0     | 1 | 1 | 1 | 1 |
| GO:0003836 | 3   | 3   | 100   | 1.13 | 0 | 0     | 0     | 0  | 0     | 0     | 0  | 0     | 0     | 1 | 1 | 1 | 1 |
| GO:0003840 | 2   | 2   | 100   | 1.13 | 0 | 0     | 0     | 0  | 0     | 0     | 0  | 0     | 0     | 1 | 1 | 1 | 1 |
| GO:0003841 | 7   | 6   | 85.71 | 0.97 | 1 | 14.29 | 4.09  | 0  | 0     | 0     | 0  | 0     | 0     | 1 | 1 | 1 | 1 |
| GO:0003842 | 1   | 1   | 100   | 1.13 | 0 | 0     | 0     | 0  | 0     | 0     | 0  | 0     | 0     | 1 | 1 | 1 | 1 |
| GO:0003843 | 1   | 1   | 100   | 1.13 | 0 | 0     | 0     | 0  | 0     | 0     | 0  | 0     | 0     | 1 | 1 | 1 | 1 |
| GO:0003844 | 4   | 4   | 100   | 1.13 | 0 | 0     | 0     | 0  | 0     | 0     | 0  | 0     | 0     | 1 | 1 | 1 | 1 |
| GO:0003845 | 2   | 2   | 100   | 1.13 | 0 | 0     | 0     | 0  | 0     | 0     | 0  | 0     | 0     | 1 | 1 | 1 | 1 |
| GO:0003847 | 17  | 15  | 88.24 | 1    | 0 | 0     | 0     | 0  | 0     | 0     | 2  | 11.76 | 3.32  | 1 | 1 | 1 | 1 |
| GO:0003851 | 2   | 2   | 100   | 1.13 | 0 | 0     | 0     | 0  | 0     | 0     | 0  | 0     | 0     | 1 | 1 | 1 | 1 |
| GO:0003854 | 3   | 0   | 0     | 0    | 0 | 0     | 0     | 2  | 66.67 | 14.35 | 1  | 33.33 | 9.41  | 1 | 1 | 1 | 1 |
| GO:0003855 | 5   | 5   | 100   | 1.13 | 0 | 0     | 0     | 0  | 0     | 0     | 0  | 0     | 0     | 1 | 1 | 1 | 1 |
| GO:0003857 | 9   | 9   | 100   | 1.13 | 0 | 0     | 0     | 0  | 0     | 0     | 0  | 0     | 0     | 1 | 1 | 1 | 1 |
| GO:0003863 | 2   | 0   | 0     | 0    | 0 | 0     | 0     | 2  | 100   | 21.53 | 0  | 0     | 0     | 1 | 1 | 1 | 1 |
| GO:0003868 | 1   | 1   | 100   | 1.13 | 0 | 0     | 0     | 0  | 0     | 0     | 0  | 0     | 0     | 1 | 1 | 1 | 1 |
| GO:0003870 | 3   | 2   | 66.67 | 0.75 | 1 | 33.33 | 9.54  | 0  | 0     | 0     | 0  | 0     | 0     | 1 | 1 | 1 | 1 |
| GO:0003872 | 9   | 9   | 100   | 1.13 | 0 | 0     | 0     | 0  | 0     | 0     | 0  | 0     | 0     | 1 | 1 | 1 | 1 |
| GO:0003873 | 1   | 1   | 100   | 1.13 | 0 | 0     | 0     | 0  | 0     | 0     | 0  | 0     | 0     | 1 | 1 | 1 | 1 |
| GO:0003874 | 1   | 1   | 100   | 1.13 | 0 | 0     | 0     | 0  | 0     | 0     | 0  | 0     | 0     | 1 | 1 | 1 | 1 |
| GO:0003875 | 3   | 3   | 100   | 1.13 | 0 | 0     | 0     | 0  | 0     | 0     | 0  | 0     | 0     | 1 | 1 | 1 | 1 |
| GO:0003876 | 2   | 1   | 50    | 0.57 | 0 | 0     | 0     | 0  | 0     | 0     | 1  | 50    | 14.11 | 1 | 1 | 1 | 1 |
| GO:0003878 | 3   | 3   | 100   | 1.13 | 0 | 0     | 0     | 0  | 0     | 0     | 0  | 0     | 0     | 1 | 1 | 1 | 1 |
| GO:0003880 | 5   | 5   | 100   | 1.13 | 0 | 0     | 0     | 0  | 0     | 0     | 0  | 0     | 0     | 1 | 1 | 1 | 1 |
| GO:0003881 | 1   | 0   | 0     | 0    | 1 | 100   | 28.63 | 0  | 0     | 0     | 0  | 0     | 0     | 1 | 1 | 1 | 1 |
| GO:0003882 | 1   | 1   | 100   | 1.13 | 0 | 0     | 0     | 0  | 0     | 0     | 0  | 0     | 0     | 1 | 1 | 1 | 1 |
| GO:0003883 | 9   | 9   | 100   | 1.13 | 0 | 0     | 0     | 0  | 0     | 0     | 0  | 0     | 0     | 1 | 1 | 1 | 1 |
| GO:0003886 | 5   | 5   | 100   | 1.13 | 0 | 0     | 0     | 0  | 0     | 0     | 0  | 0     | 0     | 1 | 1 | 1 | 1 |
| GO:0003887 | 24  | 24  | 100   | 1.13 | 0 | 0     | 0     | 0  | 0     | 0     | 0  | 0     | 0     | 1 | 1 | 1 | 1 |
| GO:0003889 | 2   | 2   | 100   | 1.13 | 0 | 0     | 0     | 0  | 0     | 0     | 0  | 0     | 0     | 1 | 1 | 1 | 1 |
| GO:0003890 | 4   | 4   | 100   | 1.13 | 0 | 0     | 0     | 0  | 0     | 0     | 0  | 0     | 0     | 1 | 1 | 1 | 1 |
| GO:0003891 | 7   | 7   | 100   | 1.13 | 0 | 0     | 0     | 0  | 0     | 0     | 0  | 0     | 0     | 1 | 1 | 1 | 1 |
| GO:0003893 | 2   | 2   | 100   | 1.13 | 0 | 0     | 0     | 0  | 0     | 0     | 0  | 0     | 0     | 1 | 1 | 1 | 1 |
| GO:0003894 | 2   | 2   | 100   | 1.13 | 0 | 0     | 0     | 0  | 0     | 0     | 0  | 0     | 0     | 1 | 1 | 1 | 1 |
| GO:0003895 | 5   | 5   | 100   | 1.13 | 0 | 0     | 0     | 0  | 0     | 0     | 0  | 0     | 0     | 1 | 1 | 1 | 1 |



|            |     |     |       |      |   |      |       |   |       |      |   |      |       |             |   |   |   |
|------------|-----|-----|-------|------|---|------|-------|---|-------|------|---|------|-------|-------------|---|---|---|
| GO:0003896 | 4   | 4   | 100   | 1.13 | 0 | 0    | 0     | 0 | 0     | 0    | 0 | 0    | 0     | 1           | 1 | 1 | 1 |
| GO:0003899 | 53  | 51  | 96.23 | 1.09 | 2 | 3.77 | 1.08  | 0 | 0     | 0    | 0 | 0    | 0     | 1           | 1 | 1 | 1 |
| GO:0003900 | 18  | 17  | 94.44 | 1.07 | 1 | 5.56 | 1.59  | 0 | 0     | 0    | 0 | 0    | 0     | 1           | 1 | 1 | 1 |
| GO:0003901 | 20  | 19  | 95    | 1.08 | 1 | 5    | 1.43  | 0 | 0     | 0    | 0 | 0    | 0     | 1           | 1 | 1 | 1 |
| GO:0003902 | 26  | 25  | 96.15 | 1.09 | 1 | 3.85 | 1.1   | 0 | 0     | 0    | 0 | 0    | 0     | 1           | 1 | 1 | 1 |
| GO:0003905 | 2   | 2   | 100   | 1.13 | 0 | 0    | 0     | 0 | 0     | 0    | 0 | 0    | 0     | 1           | 1 | 1 | 1 |
| GO:0003906 | 1   | 1   | 100   | 1.13 | 0 | 0    | 0     | 0 | 0     | 0    | 0 | 0    | 0     | 1           | 1 | 1 | 1 |
| GO:0003907 | 2   | 1   | 50    | 0.57 | 1 | 50   | 14.32 | 0 | 0     | 0    | 0 | 0    | 0     | 1           | 1 | 1 | 1 |
| GO:0003908 | 4   | 3   | 75    | 0.85 | 0 | 0    | 0     | 1 | 25    | 5.38 | 0 | 0    | 0     | 1           | 1 | 1 | 1 |
| GO:0003910 | 3   | 3   | 100   | 1.13 | 0 | 0    | 0     | 0 | 0     | 0    | 0 | 0    | 0     | 1           | 1 | 1 | 1 |
| GO:0003916 | 10  | 10  | 100   | 1.13 | 0 | 0    | 0     | 0 | 0     | 0    | 0 | 0    | 0     | 1           | 1 | 1 | 1 |
| GO:0003917 | 7   | 7   | 100   | 1.13 | 0 | 0    | 0     | 0 | 0     | 0    | 0 | 0    | 0     | 1           | 1 | 1 | 1 |
| GO:0003918 | 6   | 6   | 100   | 1.13 | 0 | 0    | 0     | 0 | 0     | 0    | 0 | 0    | 0     | 1           | 1 | 1 | 1 |
| GO:0003920 | 3   | 3   | 100   | 1.13 | 0 | 0    | 0     | 0 | 0     | 0    | 0 | 0    | 0     | 1           | 1 | 1 | 1 |
| GO:0003921 | 7   | 7   | 100   | 1.13 | 0 | 0    | 0     | 0 | 0     | 0    | 0 | 0    | 0     | 1           | 1 | 1 | 1 |
| GO:0003922 | 7   | 7   | 100   | 1.13 | 0 | 0    | 0     | 0 | 0     | 0    | 0 | 0    | 0     | 1           | 1 | 1 | 1 |
| GO:0003923 | 2   | 1   | 50    | 0.57 | 0 | 0    | 0     | 0 | 0     | 0    | 1 | 50   | 14.11 | 1           | 1 | 1 | 1 |
| GO:0003924 | 215 | 205 | 95.35 | 1.08 | 5 | 2.33 | 0.67  | 4 | 1.86  | 0.4  | 1 | 0.47 | 0.13  | 0.268122438 | 1 | 1 | 1 |
| GO:0003925 | 280 | 271 | 96.79 | 1.1  | 5 | 1.79 | 0.51  | 3 | 1.07  | 0.23 | 1 | 0.36 | 0.1   | 0.000139686 | 1 | 1 | 1 |
| GO:0003926 | 2   | 2   | 100   | 1.13 | 0 | 0    | 0     | 0 | 0     | 0    | 0 | 0    | 0     | 1           | 1 | 1 | 1 |
| GO:0003927 | 30  | 27  | 90    | 1.02 | 3 | 10   | 2.86  | 0 | 0     | 0    | 0 | 0    | 0     | 1           | 1 | 1 | 1 |
| GO:0003928 | 227 | 217 | 95.59 | 1.08 | 5 | 2.2  | 0.63  | 4 | 1.76  | 0.38 | 1 | 0.44 | 0.12  | 0.09066663  | 1 | 1 | 1 |
| GO:0003929 | 2   | 2   | 100   | 1.13 | 0 | 0    | 0     | 0 | 0     | 0    | 0 | 0    | 0     | 1           | 1 | 1 | 1 |
| GO:0003930 | 169 | 160 | 94.67 | 1.07 | 4 | 2.37 | 0.68  | 4 | 2.37  | 0.51 | 1 | 0.59 | 0.17  | 1           | 1 | 1 | 1 |
| GO:0003931 | 160 | 152 | 95    | 1.08 | 4 | 2.5  | 0.72  | 3 | 1.88  | 0.4  | 1 | 0.63 | 0.18  | 1           | 1 | 1 | 1 |
| GO:0003934 | 1   | 1   | 100   | 1.13 | 0 | 0    | 0     | 0 | 0     | 0    | 0 | 0    | 0     | 1           | 1 | 1 | 1 |
| GO:0003936 | 45  | 43  | 95.56 | 1.08 | 0 | 0    | 0     | 2 | 4.44  | 0.96 | 0 | 0    | 0     | 1           | 1 | 1 | 1 |
| GO:0003937 | 4   | 4   | 100   | 1.13 | 0 | 0    | 0     | 0 | 0     | 0    | 0 | 0    | 0     | 1           | 1 | 1 | 1 |
| GO:0003938 | 6   | 6   | 100   | 1.13 | 0 | 0    | 0     | 0 | 0     | 0    | 0 | 0    | 0     | 1           | 1 | 1 | 1 |
| GO:0003939 | 4   | 4   | 100   | 1.13 | 0 | 0    | 0     | 0 | 0     | 0    | 0 | 0    | 0     | 1           | 1 | 1 | 1 |
| GO:0003940 | 3   | 3   | 100   | 1.13 | 0 | 0    | 0     | 0 | 0     | 0    | 0 | 0    | 0     | 1           | 1 | 1 | 1 |
| GO:0003943 | 3   | 3   | 100   | 1.13 | 0 | 0    | 0     | 0 | 0     | 0    | 0 | 0    | 0     | 1           | 1 | 1 | 1 |
| GO:0003944 | 1   | 1   | 100   | 1.13 | 0 | 0    | 0     | 0 | 0     | 0    | 0 | 0    | 0     | 1           | 1 | 1 | 1 |
| GO:0003945 | 4   | 4   | 100   | 1.13 | 0 | 0    | 0     | 0 | 0     | 0    | 0 | 0    | 0     | 1           | 1 | 1 | 1 |
| GO:0003947 | 1   | 1   | 100   | 1.13 | 0 | 0    | 0     | 0 | 0     | 0    | 0 | 0    | 0     | 1           | 1 | 1 | 1 |
| GO:0003948 | 1   | 1   | 100   | 1.13 | 0 | 0    | 0     | 0 | 0     | 0    | 0 | 0    | 0     | 1           | 1 | 1 | 1 |
| GO:0003950 | 11  | 9   | 81.82 | 0.93 | 1 | 9.09 | 2.6   | 1 | 9.09  | 1.96 | 0 | 0    | 0     | 1           | 1 | 1 | 1 |
| GO:0003951 | 4   | 4   | 100   | 1.13 | 0 | 0    | 0     | 0 | 0     | 0    | 0 | 0    | 0     | 1           | 1 | 1 | 1 |
| GO:0003952 | 1   | 1   | 100   | 1.13 | 0 | 0    | 0     | 0 | 0     | 0    | 0 | 0    | 0     | 1           | 1 | 1 | 1 |
| GO:0003953 | 6   | 4   | 66.67 | 0.75 | 0 | 0    | 0     | 2 | 33.33 | 7.18 | 0 | 0    | 0     | 1           | 1 | 1 | 1 |
| GO:0003954 | 31  | 28  | 90.32 | 1.02 | 1 | 3.23 | 0.92  | 1 | 3.23  | 0.69 | 1 | 3.23 | 0.91  | 1           | 1 | 1 | 1 |

|            |    |    |       |      |   |       |       |   |       |       |     |       |       |   |   |   |   |
|------------|----|----|-------|------|---|-------|-------|---|-------|-------|-----|-------|-------|---|---|---|---|
| GO:0003955 | 4  | 4  | 100   | 1.13 | 0 | 0     | 0     | 0 | 0     | 0     | 0   | 0     | 0     | 1 | 1 | 1 | 1 |
| GO:0003956 | 1  | 1  | 100   | 1.13 | 0 | 0     | 0     | 0 | 0     | 0     | 0   | 0     | 0     | 1 | 1 | 1 | 1 |
| GO:0003957 | 6  | 6  | 100   | 1.13 | 0 | 0     | 0     | 0 | 0     | 0     | 0   | 0     | 0     | 1 | 1 | 1 | 1 |
| GO:0003958 | 1  | 1  | 100   | 1.13 | 0 | 0     | 0     | 0 | 0     | 0     | 0   | 0     | 0     | 1 | 1 | 1 | 1 |
| GO:0003960 | 10 | 10 | 100   | 1.13 | 0 | 0     | 0     | 0 | 0     | 0     | 0   | 0     | 0     | 1 | 1 | 1 | 1 |
| GO:0003963 | 6  | 6  | 100   | 1.13 | 0 | 0     | 0     | 0 | 0     | 0     | 0   | 0     | 0     | 1 | 1 | 1 | 1 |
| GO:0003964 | 1  | 1  | 100   | 1.13 | 0 | 0     | 0     | 0 | 0     | 0     | 0   | 0     | 0     | 1 | 1 | 1 | 1 |
| GO:0003969 | 1  | 1  | 100   | 1.13 | 0 | 0     | 0     | 0 | 0     | 0     | 0   | 0     | 0     | 1 | 1 | 1 | 1 |
| GO:0003973 | 2  | 0  | 0     | 0    | 0 | 0     | 0     | 0 | 0     | 2     | 100 | 28.22 | 0     | 1 | 1 | 1 | 1 |
| GO:0003975 | 1  | 1  | 100   | 1.13 | 0 | 0     | 0     | 0 | 0     | 0     | 0   | 0     | 0     | 1 | 1 | 1 | 1 |
| GO:0003977 | 3  | 3  | 100   | 1.13 | 0 | 0     | 0     | 0 | 0     | 0     | 0   | 0     | 0     | 1 | 1 | 1 | 1 |
| GO:0003978 | 2  | 2  | 100   | 1.13 | 0 | 0     | 0     | 0 | 0     | 0     | 0   | 0     | 0     | 1 | 1 | 1 | 1 |
| GO:0003979 | 6  | 6  | 100   | 1.13 | 0 | 0     | 0     | 0 | 0     | 0     | 0   | 0     | 0     | 1 | 1 | 1 | 1 |
| GO:0003980 | 4  | 4  | 100   | 1.13 | 0 | 0     | 0     | 0 | 0     | 0     | 0   | 0     | 0     | 1 | 1 | 1 | 1 |
| GO:0003981 | 3  | 0  | 0     | 0    | 0 | 0     | 0     | 1 | 33.33 | 7.18  | 2   | 66.67 | 18.82 | 1 | 1 | 1 | 1 |
| GO:0003982 | 2  | 0  | 0     | 0    | 1 | 50    | 14.32 | 1 | 50    | 10.76 | 0   | 0     | 0     | 1 | 1 | 1 | 1 |
| GO:0003983 | 1  | 1  | 100   | 1.13 | 0 | 0     | 0     | 0 | 0     | 0     | 0   | 0     | 0     | 1 | 1 | 1 | 1 |
| GO:0003985 | 7  | 7  | 100   | 1.13 | 0 | 0     | 0     | 0 | 0     | 0     | 0   | 0     | 0     | 1 | 1 | 1 | 1 |
| GO:0003987 | 6  | 5  | 83.33 | 0.94 | 1 | 16.67 | 4.77  | 0 | 0     | 0     | 0   | 0     | 0     | 1 | 1 | 1 | 1 |
| GO:0003988 | 5  | 5  | 100   | 1.13 | 0 | 0     | 0     | 0 | 0     | 0     | 0   | 0     | 0     | 1 | 1 | 1 | 1 |
| GO:0003993 | 25 | 25 | 100   | 1.13 | 0 | 0     | 0     | 0 | 0     | 0     | 0   | 0     | 0     | 1 | 1 | 1 | 1 |
| GO:0003994 | 4  | 4  | 100   | 1.13 | 0 | 0     | 0     | 0 | 0     | 0     | 0   | 0     | 0     | 1 | 1 | 1 | 1 |
| GO:0003995 | 27 | 27 | 100   | 1.13 | 0 | 0     | 0     | 0 | 0     | 0     | 0   | 0     | 0     | 1 | 1 | 1 | 1 |
| GO:0003996 | 1  | 0  | 0     | 0    | 0 | 0     | 0     | 1 | 100   | 21.53 | 0   | 0     | 0     | 1 | 1 | 1 | 1 |
| GO:0003997 | 4  | 4  | 100   | 1.13 | 0 | 0     | 0     | 0 | 0     | 0     | 0   | 0     | 0     | 1 | 1 | 1 | 1 |
| GO:0003998 | 7  | 7  | 100   | 1.13 | 0 | 0     | 0     | 0 | 0     | 0     | 0   | 0     | 0     | 1 | 1 | 1 | 1 |
| GO:0003999 | 1  | 1  | 100   | 1.13 | 0 | 0     | 0     | 0 | 0     | 0     | 0   | 0     | 0     | 1 | 1 | 1 | 1 |
| GO:0004000 | 2  | 2  | 100   | 1.13 | 0 | 0     | 0     | 0 | 0     | 0     | 0   | 0     | 0     | 1 | 1 | 1 | 1 |
| GO:0004001 | 2  | 2  | 100   | 1.13 | 0 | 0     | 0     | 0 | 0     | 0     | 0   | 0     | 0     | 1 | 1 | 1 | 1 |
| GO:0004002 | 46 | 46 | 100   | 1.13 | 0 | 0     | 0     | 0 | 0     | 0     | 0   | 0     | 0     | 1 | 1 | 1 | 1 |
| GO:0004003 | 18 | 17 | 94.44 | 1.07 | 0 | 0     | 0     | 1 | 5.56  | 1.2   | 0   | 0     | 0     | 1 | 1 | 1 | 1 |
| GO:0004004 | 12 | 12 | 100   | 1.13 | 0 | 0     | 0     | 0 | 0     | 0     | 0   | 0     | 0     | 1 | 1 | 1 | 1 |
| GO:0004005 | 12 | 10 | 83.33 | 0.94 | 0 | 0     | 0     | 0 | 0     | 0     | 2   | 16.67 | 4.7   | 1 | 1 | 1 | 1 |
| GO:0004008 | 2  | 2  | 100   | 1.13 | 0 | 0     | 0     | 0 | 0     | 0     | 0   | 0     | 0     | 1 | 1 | 1 | 1 |
| GO:0004009 | 62 | 55 | 88.71 | 1    | 2 | 3.23  | 0.92  | 3 | 4.84  | 1.04  | 2   | 3.23  | 0.91  | 1 | 1 | 1 | 1 |
| GO:0004012 | 5  | 4  | 80    | 0.91 | 0 | 0     | 0     | 0 | 0     | 0     | 1   | 20    | 5.64  | 1 | 1 | 1 | 1 |
| GO:0004013 | 1  | 1  | 100   | 1.13 | 0 | 0     | 0     | 0 | 0     | 0     | 0   | 0     | 0     | 1 | 1 | 1 | 1 |
| GO:0004016 | 5  | 5  | 100   | 1.13 | 0 | 0     | 0     | 0 | 0     | 0     | 0   | 0     | 0     | 1 | 1 | 1 | 1 |
| GO:0004017 | 11 | 11 | 100   | 1.13 | 0 | 0     | 0     | 0 | 0     | 0     | 0   | 0     | 0     | 1 | 1 | 1 | 1 |
| GO:0004018 | 3  | 3  | 100   | 1.13 | 0 | 0     | 0     | 0 | 0     | 0     | 0   | 0     | 0     | 1 | 1 | 1 | 1 |
| GO:0004019 | 8  | 8  | 100   | 1.13 | 0 | 0     | 0     | 0 | 0     | 0     | 0   | 0     | 0     | 1 | 1 | 1 | 1 |

|            |    |    |       |      |   |       |       |   |       |       |   |      |       |   |   |   |   |
|------------|----|----|-------|------|---|-------|-------|---|-------|-------|---|------|-------|---|---|---|---|
| GO:0004021 | 1  | 1  | 100   | 1.13 | 0 | 0     | 0     | 0 | 0     | 0     | 0 | 0    | 0     | 1 | 1 | 1 | 1 |
| GO:0004022 | 3  | 1  | 33.33 | 0.38 | 1 | 33.33 | 9.54  | 1 | 33.33 | 7.18  | 0 | 0    | 0     | 1 | 1 | 1 | 1 |
| GO:0004023 | 2  | 2  | 100   | 1.13 | 0 | 0     | 0     | 0 | 0     | 0     | 0 | 0    | 0     | 1 | 1 | 1 | 1 |
| GO:0004024 | 37 | 34 | 91.89 | 1.04 | 2 | 5.41  | 1.55  | 1 | 2.7   | 0.58  | 0 | 0    | 0     | 1 | 1 | 1 | 1 |
| GO:0004025 | 2  | 2  | 100   | 1.13 | 0 | 0     | 0     | 0 | 0     | 0     | 0 | 0    | 0     | 1 | 1 | 1 | 1 |
| GO:0004027 | 2  | 0  | 0     | 0    | 0 | 0     | 0     | 0 | 0     | 0     | 2 | 100  | 28.22 | 1 | 1 | 1 | 1 |
| GO:0004028 | 2  | 1  | 50    | 0.57 | 1 | 50    | 14.32 | 0 | 0     | 0     | 0 | 0    | 0     | 1 | 1 | 1 | 1 |
| GO:0004029 | 15 | 14 | 93.33 | 1.06 | 1 | 6.67  | 1.91  | 0 | 0     | 0     | 0 | 0    | 0     | 1 | 1 | 1 | 1 |
| GO:0004030 | 1  | 0  | 0     | 0    | 1 | 100   | 28.63 | 0 | 0     | 0     | 0 | 0    | 0     | 1 | 1 | 1 | 1 |
| GO:0004031 | 3  | 1  | 33.33 | 0.38 | 1 | 33.33 | 9.54  | 1 | 33.33 | 7.18  | 0 | 0    | 0     | 1 | 1 | 1 | 1 |
| GO:0004032 | 20 | 19 | 95    | 1.08 | 1 | 5     | 1.43  | 0 | 0     | 0     | 0 | 0    | 0     | 1 | 1 | 1 | 1 |
| GO:0004033 | 8  | 5  | 62.5  | 0.71 | 0 | 0     | 0     | 0 | 0     | 0     | 3 | 37.5 | 10.58 | 1 | 1 | 1 | 1 |
| GO:0004034 | 1  | 0  | 0     | 0    | 0 | 0     | 0     | 0 | 0     | 0     | 1 | 100  | 28.22 | 1 | 1 | 1 | 1 |
| GO:0004035 | 3  | 3  | 100   | 1.13 | 0 | 0     | 0     | 0 | 0     | 0     | 0 | 0    | 0     | 1 | 1 | 1 | 1 |
| GO:0004040 | 3  | 3  | 100   | 1.13 | 0 | 0     | 0     | 0 | 0     | 0     | 0 | 0    | 0     | 1 | 1 | 1 | 1 |
| GO:0004041 | 5  | 3  | 60    | 0.68 | 2 | 40    | 11.45 | 0 | 0     | 0     | 0 | 0    | 0     | 1 | 1 | 1 | 1 |
| GO:0004042 | 1  | 1  | 100   | 1.13 | 0 | 0     | 0     | 0 | 0     | 0     | 0 | 0    | 0     | 1 | 1 | 1 | 1 |
| GO:0004044 | 4  | 4  | 100   | 1.13 | 0 | 0     | 0     | 0 | 0     | 0     | 0 | 0    | 0     | 1 | 1 | 1 | 1 |
| GO:0004045 | 1  | 1  | 100   | 1.13 | 0 | 0     | 0     | 0 | 0     | 0     | 0 | 0    | 0     | 1 | 1 | 1 | 1 |
| GO:0004046 | 2  | 1  | 50    | 0.57 | 0 | 0     | 0     | 0 | 0     | 0     | 1 | 50   | 14.11 | 1 | 1 | 1 | 1 |
| GO:0004047 | 1  | 1  | 100   | 1.13 | 0 | 0     | 0     | 0 | 0     | 0     | 0 | 0    | 0     | 1 | 1 | 1 | 1 |
| GO:0004049 | 7  | 7  | 100   | 1.13 | 0 | 0     | 0     | 0 | 0     | 0     | 0 | 0    | 0     | 1 | 1 | 1 | 1 |
| GO:0004050 | 10 | 9  | 90    | 1.02 | 1 | 10    | 2.86  | 0 | 0     | 0     | 0 | 0    | 0     | 1 | 1 | 1 | 1 |
| GO:0004051 | 2  | 2  | 100   | 1.13 | 0 | 0     | 0     | 0 | 0     | 0     | 0 | 0    | 0     | 1 | 1 | 1 | 1 |
| GO:0004052 | 4  | 4  | 100   | 1.13 | 0 | 0     | 0     | 0 | 0     | 0     | 0 | 0    | 0     | 1 | 1 | 1 | 1 |
| GO:0004053 | 2  | 0  | 0     | 0    | 0 | 0     | 0     | 1 | 50    | 10.76 | 1 | 50   | 14.11 | 1 | 1 | 1 | 1 |
| GO:0004055 | 1  | 1  | 100   | 1.13 | 0 | 0     | 0     | 0 | 0     | 0     | 0 | 0    | 0     | 1 | 1 | 1 | 1 |
| GO:0004056 | 3  | 3  | 100   | 1.13 | 0 | 0     | 0     | 0 | 0     | 0     | 0 | 0    | 0     | 1 | 1 | 1 | 1 |
| GO:0004057 | 3  | 3  | 100   | 1.13 | 0 | 0     | 0     | 0 | 0     | 0     | 0 | 0    | 0     | 1 | 1 | 1 | 1 |
| GO:0004060 | 1  | 0  | 0     | 0    | 0 | 0     | 0     | 1 | 100   | 21.53 | 0 | 0    | 0     | 1 | 1 | 1 | 1 |
| GO:0004062 | 2  | 0  | 0     | 0    | 0 | 0     | 0     | 1 | 50    | 10.76 | 1 | 50   | 14.11 | 1 | 1 | 1 | 1 |
| GO:0004064 | 4  | 4  | 100   | 1.13 | 0 | 0     | 0     | 0 | 0     | 0     | 0 | 0    | 0     | 1 | 1 | 1 | 1 |
| GO:0004065 | 3  | 3  | 100   | 1.13 | 0 | 0     | 0     | 0 | 0     | 0     | 0 | 0    | 0     | 1 | 1 | 1 | 1 |
| GO:0004066 | 4  | 4  | 100   | 1.13 | 0 | 0     | 0     | 0 | 0     | 0     | 0 | 0    | 0     | 1 | 1 | 1 | 1 |
| GO:0004067 | 4  | 4  | 100   | 1.13 | 0 | 0     | 0     | 0 | 0     | 0     | 0 | 0    | 0     | 1 | 1 | 1 | 1 |
| GO:0004069 | 8  | 8  | 100   | 1.13 | 0 | 0     | 0     | 0 | 0     | 0     | 0 | 0    | 0     | 1 | 1 | 1 | 1 |
| GO:0004074 | 3  | 3  | 100   | 1.13 | 0 | 0     | 0     | 0 | 0     | 0     | 0 | 0    | 0     | 1 | 1 | 1 | 1 |
| GO:0004075 | 1  | 1  | 100   | 1.13 | 0 | 0     | 0     | 0 | 0     | 0     | 0 | 0    | 0     | 1 | 1 | 1 | 1 |
| GO:0004077 | 1  | 1  | 100   | 1.13 | 0 | 0     | 0     | 0 | 0     | 0     | 0 | 0    | 0     | 1 | 1 | 1 | 1 |
| GO:0004081 | 2  | 2  | 100   | 1.13 | 0 | 0     | 0     | 0 | 0     | 0     | 0 | 0    | 0     | 1 | 1 | 1 | 1 |
| GO:0004082 | 4  | 2  | 50    | 0.57 | 0 | 0     | 0     | 2 | 50    | 10.76 | 0 | 0    | 0     | 1 | 1 | 1 | 1 |

|            |    |    |       |      |   |       |      |   |       |      |   |       |      |   |   |   |   |
|------------|----|----|-------|------|---|-------|------|---|-------|------|---|-------|------|---|---|---|---|
| GO:0004083 | 1  | 1  | 100   | 1.13 | 0 | 0     | 0    | 0 | 0     | 0    | 0 | 0     | 0    | 1 | 1 | 1 | 1 |
| GO:0004084 | 5  | 5  | 100   | 1.13 | 0 | 0     | 0    | 0 | 0     | 0    | 0 | 0     | 0    | 1 | 1 | 1 | 1 |
| GO:0004085 | 3  | 3  | 100   | 1.13 | 0 | 0     | 0    | 0 | 0     | 0    | 0 | 0     | 0    | 1 | 1 | 1 | 1 |
| GO:0004089 | 18 | 16 | 88.89 | 1.01 | 1 | 5.56  | 1.59 | 1 | 5.56  | 1.2  | 0 | 0     | 0    | 1 | 1 | 1 | 1 |
| GO:0004090 | 5  | 5  | 100   | 1.13 | 0 | 0     | 0    | 0 | 0     | 0    | 0 | 0     | 0    | 1 | 1 | 1 | 1 |
| GO:0004091 | 7  | 4  | 57.14 | 0.65 | 0 | 0     | 0    | 1 | 14.29 | 3.08 | 2 | 28.57 | 8.06 | 1 | 1 | 1 | 1 |
| GO:0004092 | 2  | 2  | 100   | 1.13 | 0 | 0     | 0    | 0 | 0     | 0    | 0 | 0     | 0    | 1 | 1 | 1 | 1 |
| GO:0004093 | 1  | 1  | 100   | 1.13 | 0 | 0     | 0    | 0 | 0     | 0    | 0 | 0     | 0    | 1 | 1 | 1 | 1 |
| GO:0004094 | 1  | 1  | 100   | 1.13 | 0 | 0     | 0    | 0 | 0     | 0    | 0 | 0     | 0    | 1 | 1 | 1 | 1 |
| GO:0004095 | 6  | 6  | 100   | 1.13 | 0 | 0     | 0    | 0 | 0     | 0    | 0 | 0     | 0    | 1 | 1 | 1 | 1 |
| GO:0004096 | 6  | 6  | 100   | 1.13 | 0 | 0     | 0    | 0 | 0     | 0    | 0 | 0     | 0    | 1 | 1 | 1 | 1 |
| GO:0004098 | 1  | 1  | 100   | 1.13 | 0 | 0     | 0    | 0 | 0     | 0    | 0 | 0     | 0    | 1 | 1 | 1 | 1 |
| GO:0004103 | 4  | 4  | 100   | 1.13 | 0 | 0     | 0    | 0 | 0     | 0    | 0 | 0     | 0    | 1 | 1 | 1 | 1 |
| GO:0004105 | 3  | 2  | 66.67 | 0.75 | 1 | 33.33 | 9.54 | 0 | 0     | 0    | 0 | 0     | 0    | 1 | 1 | 1 | 1 |
| GO:0004108 | 9  | 9  | 100   | 1.13 | 0 | 0     | 0    | 0 | 0     | 0    | 0 | 0     | 0    | 1 | 1 | 1 | 1 |
| GO:0004109 | 2  | 2  | 100   | 1.13 | 0 | 0     | 0    | 0 | 0     | 0    | 0 | 0     | 0    | 1 | 1 | 1 | 1 |
| GO:0004111 | 4  | 4  | 100   | 1.13 | 0 | 0     | 0    | 0 | 0     | 0    | 0 | 0     | 0    | 1 | 1 | 1 | 1 |
| GO:0004113 | 4  | 4  | 100   | 1.13 | 0 | 0     | 0    | 0 | 0     | 0    | 0 | 0     | 0    | 1 | 1 | 1 | 1 |
| GO:0004114 | 8  | 7  | 87.5  | 0.99 | 0 | 0     | 0    | 0 | 0     | 0    | 1 | 12.5  | 3.53 | 1 | 1 | 1 | 1 |
| GO:0004115 | 3  | 3  | 100   | 1.13 | 0 | 0     | 0    | 0 | 0     | 0    | 0 | 0     | 0    | 1 | 1 | 1 | 1 |
| GO:0004116 | 1  | 1  | 100   | 1.13 | 0 | 0     | 0    | 0 | 0     | 0    | 0 | 0     | 0    | 1 | 1 | 1 | 1 |
| GO:0004119 | 1  | 1  | 100   | 1.13 | 0 | 0     | 0    | 0 | 0     | 0    | 0 | 0     | 0    | 1 | 1 | 1 | 1 |
| GO:0004122 | 1  | 1  | 100   | 1.13 | 0 | 0     | 0    | 0 | 0     | 0    | 0 | 0     | 0    | 1 | 1 | 1 | 1 |
| GO:0004127 | 2  | 2  | 100   | 1.13 | 0 | 0     | 0    | 0 | 0     | 0    | 0 | 0     | 0    | 1 | 1 | 1 | 1 |
| GO:0004128 | 3  | 3  | 100   | 1.13 | 0 | 0     | 0    | 0 | 0     | 0    | 0 | 0     | 0    | 1 | 1 | 1 | 1 |
| GO:0004129 | 34 | 31 | 91.18 | 1.03 | 0 | 0     | 0    | 3 | 8.82  | 1.9  | 0 | 0     | 0    | 1 | 1 | 1 | 1 |
| GO:0004132 | 1  | 1  | 100   | 1.13 | 0 | 0     | 0    | 0 | 0     | 0    | 0 | 0     | 0    | 1 | 1 | 1 | 1 |
| GO:0004137 | 2  | 2  | 100   | 1.13 | 0 | 0     | 0    | 0 | 0     | 0    | 0 | 0     | 0    | 1 | 1 | 1 | 1 |
| GO:0004138 | 2  | 2  | 100   | 1.13 | 0 | 0     | 0    | 0 | 0     | 0    | 0 | 0     | 0    | 1 | 1 | 1 | 1 |
| GO:0004139 | 2  | 2  | 100   | 1.13 | 0 | 0     | 0    | 0 | 0     | 0    | 0 | 0     | 0    | 1 | 1 | 1 | 1 |
| GO:0004140 | 4  | 4  | 100   | 1.13 | 0 | 0     | 0    | 0 | 0     | 0    | 0 | 0     | 0    | 1 | 1 | 1 | 1 |
| GO:0004143 | 7  | 6  | 85.71 | 0.97 | 1 | 14.29 | 4.09 | 0 | 0     | 0    | 0 | 0     | 0    | 1 | 1 | 1 | 1 |
| GO:0004144 | 1  | 1  | 100   | 1.13 | 0 | 0     | 0    | 0 | 0     | 0    | 0 | 0     | 0    | 1 | 1 | 1 | 1 |
| GO:0004145 | 3  | 3  | 100   | 1.13 | 0 | 0     | 0    | 0 | 0     | 0    | 0 | 0     | 0    | 1 | 1 | 1 | 1 |
| GO:0004146 | 1  | 1  | 100   | 1.13 | 0 | 0     | 0    | 0 | 0     | 0    | 0 | 0     | 0    | 1 | 1 | 1 | 1 |
| GO:0004148 | 4  | 4  | 100   | 1.13 | 0 | 0     | 0    | 0 | 0     | 0    | 0 | 0     | 0    | 1 | 1 | 1 | 1 |
| GO:0004149 | 1  | 1  | 100   | 1.13 | 0 | 0     | 0    | 0 | 0     | 0    | 0 | 0     | 0    | 1 | 1 | 1 | 1 |
| GO:0004152 | 5  | 5  | 100   | 1.13 | 0 | 0     | 0    | 0 | 0     | 0    | 0 | 0     | 0    | 1 | 1 | 1 | 1 |
| GO:0004155 | 2  | 2  | 100   | 1.13 | 0 | 0     | 0    | 0 | 0     | 0    | 0 | 0     | 0    | 1 | 1 | 1 | 1 |
| GO:0004156 | 1  | 1  | 100   | 1.13 | 0 | 0     | 0    | 0 | 0     | 0    | 0 | 0     | 0    | 1 | 1 | 1 | 1 |
| GO:0004157 | 3  | 3  | 100   | 1.13 | 0 | 0     | 0    | 0 | 0     | 0    | 0 | 0     | 0    | 1 | 1 | 1 | 1 |

|            |     |     |       |      |   |      |       |   |       |       |   |       |       |   |   |   |   |
|------------|-----|-----|-------|------|---|------|-------|---|-------|-------|---|-------|-------|---|---|---|---|
| GO:0004158 | 1   | 1   | 100   | 1.13 | 0 | 0    | 0     | 0 | 0     | 0     | 0 | 0     | 0     | 1 | 1 | 1 | 1 |
| GO:0004161 | 1   | 1   | 100   | 1.13 | 0 | 0    | 0     | 0 | 0     | 0     | 0 | 0     | 0     | 1 | 1 | 1 | 1 |
| GO:0004164 | 2   | 1   | 50    | 0.57 | 1 | 50   | 14.32 | 0 | 0     | 0     | 0 | 0     | 0     | 1 | 1 | 1 | 1 |
| GO:0004165 | 3   | 3   | 100   | 1.13 | 0 | 0    | 0     | 0 | 0     | 0     | 0 | 0     | 0     | 1 | 1 | 1 | 1 |
| GO:0004167 | 1   | 0   | 0     | 0    | 1 | 100  | 28.63 | 0 | 0     | 0     | 0 | 0     | 0     | 1 | 1 | 1 | 1 |
| GO:0004169 | 1   | 1   | 100   | 1.13 | 0 | 0    | 0     | 0 | 0     | 0     | 0 | 0     | 0     | 1 | 1 | 1 | 1 |
| GO:0004170 | 3   | 3   | 100   | 1.13 | 0 | 0    | 0     | 0 | 0     | 0     | 0 | 0     | 0     | 1 | 1 | 1 | 1 |
| GO:0004171 | 2   | 0   | 0     | 0    | 0 | 0    | 0     | 1 | 50    | 10.76 | 1 | 50    | 14.11 | 1 | 1 | 1 | 1 |
| GO:0004174 | 3   | 3   | 100   | 1.13 | 0 | 0    | 0     | 0 | 0     | 0     | 0 | 0     | 0     | 1 | 1 | 1 | 1 |
| GO:0004175 | 43  | 40  | 93.02 | 1.05 | 0 | 0    | 0     | 3 | 6.98  | 1.5   | 0 | 0     | 0     | 1 | 1 | 1 | 1 |
| GO:0004176 | 5   | 4   | 80    | 0.91 | 0 | 0    | 0     | 1 | 20    | 4.31  | 0 | 0     | 0     | 1 | 1 | 1 | 1 |
| GO:0004177 | 47  | 47  | 100   | 1.13 | 0 | 0    | 0     | 0 | 0     | 0     | 0 | 0     | 0     | 1 | 1 | 1 | 1 |
| GO:0004178 | 5   | 5   | 100   | 1.13 | 0 | 0    | 0     | 0 | 0     | 0     | 0 | 0     | 0     | 1 | 1 | 1 | 1 |
| GO:0004179 | 11  | 11  | 100   | 1.13 | 0 | 0    | 0     | 0 | 0     | 0     | 0 | 0     | 0     | 1 | 1 | 1 | 1 |
| GO:0004180 | 39  | 30  | 76.92 | 0.87 | 0 | 0    | 0     | 7 | 17.95 | 3.86  | 2 | 5.13  | 1.45  | 1 | 1 | 1 | 1 |
| GO:0004182 | 24  | 20  | 83.33 | 0.94 | 0 | 0    | 0     | 3 | 12.5  | 2.69  | 1 | 4.17  | 1.18  | 1 | 1 | 1 | 1 |
| GO:0004183 | 1   | 1   | 100   | 1.13 | 0 | 0    | 0     | 0 | 0     | 0     | 0 | 0     | 0     | 1 | 1 | 1 | 1 |
| GO:0004184 | 1   | 0   | 0     | 0    | 0 | 0    | 0     | 1 | 100   | 21.53 | 0 | 0     | 0     | 1 | 1 | 1 | 1 |
| GO:0004185 | 6   | 3   | 50    | 0.57 | 0 | 0    | 0     | 3 | 50    | 10.76 | 0 | 0     | 0     | 1 | 1 | 1 | 1 |
| GO:0004186 | 5   | 2   | 40    | 0.45 | 0 | 0    | 0     | 3 | 60    | 12.92 | 0 | 0     | 0     | 1 | 1 | 1 | 1 |
| GO:0004188 | 2   | 2   | 100   | 1.13 | 0 | 0    | 0     | 0 | 0     | 0     | 0 | 0     | 0     | 1 | 1 | 1 | 1 |
| GO:0004190 | 39  | 31  | 79.49 | 0.9  | 2 | 5.13 | 1.47  | 4 | 10.26 | 2.21  | 2 | 5.13  | 1.45  | 1 | 1 | 1 | 1 |
| GO:0004192 | 15  | 14  | 93.33 | 1.06 | 0 | 0    | 0     | 1 | 6.67  | 1.44  | 0 | 0     | 0     | 1 | 1 | 1 | 1 |
| GO:0004193 | 1   | 1   | 100   | 1.13 | 0 | 0    | 0     | 0 | 0     | 0     | 0 | 0     | 0     | 1 | 1 | 1 | 1 |
| GO:0004194 | 25  | 24  | 96    | 1.09 | 0 | 0    | 0     | 1 | 4     | 0.86  | 0 | 0     | 0     | 1 | 1 | 1 | 1 |
| GO:0004195 | 1   | 1   | 100   | 1.13 | 0 | 0    | 0     | 0 | 0     | 0     | 0 | 0     | 0     | 1 | 1 | 1 | 1 |
| GO:0004197 | 172 | 164 | 95.35 | 1.08 | 1 | 0.58 | 0.17  | 3 | 1.74  | 0.38  | 4 | 2.33  | 0.66  | 1 | 1 | 1 | 1 |
| GO:0004198 | 13  | 13  | 100   | 1.13 | 0 | 0    | 0     | 0 | 0     | 0     | 0 | 0     | 0     | 1 | 1 | 1 | 1 |
| GO:0004199 | 6   | 5   | 83.33 | 0.94 | 0 | 0    | 0     | 0 | 0     | 0     | 1 | 16.67 | 4.7   | 1 | 1 | 1 | 1 |
| GO:0004200 | 3   | 3   | 100   | 1.13 | 0 | 0    | 0     | 0 | 0     | 0     | 0 | 0     | 0     | 1 | 1 | 1 | 1 |
| GO:0004202 | 3   | 3   | 100   | 1.13 | 0 | 0    | 0     | 0 | 0     | 0     | 0 | 0     | 0     | 1 | 1 | 1 | 1 |
| GO:0004203 | 3   | 3   | 100   | 1.13 | 0 | 0    | 0     | 0 | 0     | 0     | 0 | 0     | 0     | 1 | 1 | 1 | 1 |
| GO:0004204 | 3   | 3   | 100   | 1.13 | 0 | 0    | 0     | 0 | 0     | 0     | 0 | 0     | 0     | 1 | 1 | 1 | 1 |
| GO:0004205 | 3   | 3   | 100   | 1.13 | 0 | 0    | 0     | 0 | 0     | 0     | 0 | 0     | 0     | 1 | 1 | 1 | 1 |
| GO:0004206 | 3   | 3   | 100   | 1.13 | 0 | 0    | 0     | 0 | 0     | 0     | 0 | 0     | 0     | 1 | 1 | 1 | 1 |
| GO:0004207 | 3   | 3   | 100   | 1.13 | 0 | 0    | 0     | 0 | 0     | 0     | 0 | 0     | 0     | 1 | 1 | 1 | 1 |
| GO:0004208 | 3   | 3   | 100   | 1.13 | 0 | 0    | 0     | 0 | 0     | 0     | 0 | 0     | 0     | 1 | 1 | 1 | 1 |
| GO:0004209 | 3   | 3   | 100   | 1.13 | 0 | 0    | 0     | 0 | 0     | 0     | 0 | 0     | 0     | 1 | 1 | 1 | 1 |
| GO:0004210 | 3   | 3   | 100   | 1.13 | 0 | 0    | 0     | 0 | 0     | 0     | 0 | 0     | 0     | 1 | 1 | 1 | 1 |
| GO:0004211 | 3   | 3   | 100   | 1.13 | 0 | 0    | 0     | 0 | 0     | 0     | 0 | 0     | 0     | 1 | 1 | 1 | 1 |
| GO:0004212 | 3   | 3   | 100   | 1.13 | 0 | 0    | 0     | 0 | 0     | 0     | 0 | 0     | 0     | 1 | 1 | 1 | 1 |

|            |     |    |       |      |    |       |       |    |       |       |     |       |      |   |            |            |   |
|------------|-----|----|-------|------|----|-------|-------|----|-------|-------|-----|-------|------|---|------------|------------|---|
| GO:0004213 | 6   | 6  | 100   | 1.13 | 0  | 0     | 0     | 0  | 0     | 0     | 0   | 0     | 0    | 1 | 1          | 1          | 1 |
| GO:0004214 | 4   | 4  | 100   | 1.13 | 0  | 0     | 0     | 0  | 0     | 0     | 0   | 0     | 0    | 1 | 1          | 1          | 1 |
| GO:0004215 | 4   | 4  | 100   | 1.13 | 0  | 0     | 0     | 0  | 0     | 0     | 0   | 0     | 0    | 1 | 1          | 1          | 1 |
| GO:0004216 | 2   | 0  | 0     | 0    | 0  | 0     | 0     | 0  | 0     | 2     | 100 | 28.22 | 0    | 1 | 1          | 1          | 1 |
| GO:0004217 | 3   | 3  | 100   | 1.13 | 0  | 0     | 0     | 0  | 0     | 0     | 0   | 0     | 0    | 1 | 1          | 1          | 1 |
| GO:0004218 | 3   | 0  | 0     | 0    | 0  | 0     | 0     | 2  | 66.67 | 14.35 | 1   | 33.33 | 9.41 | 1 | 1          | 1          | 1 |
| GO:0004219 | 1   | 1  | 100   | 1.13 | 0  | 0     | 0     | 0  | 0     | 0     | 0   | 0     | 0    | 1 | 1          | 1          | 1 |
| GO:0004221 | 79  | 78 | 98.73 | 1.12 | 1  | 1.27  | 0.36  | 0  | 0     | 0     | 0   | 0     | 0    | 1 | 1          | 1          | 1 |
| GO:0004222 | 115 | 82 | 71.3  | 0.81 | 15 | 13.04 | 3.73  | 15 | 13.04 | 2.81  | 3   | 2.61  | 0.74 | 1 | 0.07648839 | 1          | 1 |
| GO:0004228 | 1   | 1  | 100   | 1.13 | 0  | 0     | 0     | 0  | 0     | 0     | 0   | 0     | 0    | 1 | 1          | 1          | 1 |
| GO:0004229 | 1   | 1  | 100   | 1.13 | 0  | 0     | 0     | 0  | 0     | 0     | 0   | 0     | 0    | 1 | 1          | 1          | 1 |
| GO:0004232 | 3   | 0  | 0     | 0    | 0  | 0     | 0     | 3  | 100   | 21.53 | 0   | 0     | 0    | 1 | 1          | 0.43202791 | 1 |
| GO:0004235 | 1   | 0  | 0     | 0    | 0  | 0     | 0     | 1  | 100   | 21.53 | 0   | 0     | 0    | 1 | 1          | 1          | 1 |
| GO:0004237 | 2   | 2  | 100   | 1.13 | 0  | 0     | 0     | 0  | 0     | 0     | 0   | 0     | 0    | 1 | 1          | 1          | 1 |
| GO:0004239 | 12  | 12 | 100   | 1.13 | 0  | 0     | 0     | 0  | 0     | 0     | 0   | 0     | 0    | 1 | 1          | 1          | 1 |
| GO:0004240 | 3   | 3  | 100   | 1.13 | 0  | 0     | 0     | 0  | 0     | 0     | 0   | 0     | 0    | 1 | 1          | 1          | 1 |
| GO:0004243 | 3   | 3  | 100   | 1.13 | 0  | 0     | 0     | 0  | 0     | 0     | 0   | 0     | 0    | 1 | 1          | 1          | 1 |
| GO:0004245 | 6   | 5  | 83.33 | 0.94 | 1  | 16.67 | 4.77  | 0  | 0     | 0     | 0   | 0     | 0    | 1 | 1          | 1          | 1 |
| GO:0004246 | 2   | 2  | 100   | 1.13 | 0  | 0     | 0     | 0  | 0     | 0     | 0   | 0     | 0    | 1 | 1          | 1          | 1 |
| GO:0004249 | 8   | 5  | 62.5  | 0.71 | 3  | 37.5  | 10.74 | 0  | 0     | 0     | 0   | 0     | 0    | 1 | 1          | 1          | 1 |
| GO:0004250 | 4   | 4  | 100   | 1.13 | 0  | 0     | 0     | 0  | 0     | 0     | 0   | 0     | 0    | 1 | 1          | 1          | 1 |
| GO:0004251 | 1   | 1  | 100   | 1.13 | 0  | 0     | 0     | 0  | 0     | 0     | 0   | 0     | 0    | 1 | 1          | 1          | 1 |
| GO:0004252 | 119 | 94 | 78.99 | 0.89 | 10 | 8.4   | 2.41  | 7  | 5.88  | 1.27  | 8   | 6.72  | 1.9  | 1 | 1          | 1          | 1 |
| GO:0004254 | 1   | 1  | 100   | 1.13 | 0  | 0     | 0     | 0  | 0     | 0     | 0   | 0     | 0    | 1 | 1          | 1          | 1 |
| GO:0004258 | 1   | 0  | 0     | 0    | 0  | 0     | 0     | 1  | 100   | 21.53 | 0   | 0     | 0    | 1 | 1          | 1          | 1 |
| GO:0004263 | 50  | 40 | 80    | 0.91 | 2  | 4     | 1.15  | 2  | 4     | 0.86  | 6   | 12    | 3.39 | 1 | 1          | 1          | 1 |
| GO:0004274 | 6   | 6  | 100   | 1.13 | 0  | 0     | 0     | 0  | 0     | 0     | 0   | 0     | 0    | 1 | 1          | 1          | 1 |
| GO:0004277 | 2   | 0  | 0     | 0    | 0  | 0     | 0     | 2  | 100   | 21.53 | 0   | 0     | 0    | 1 | 1          | 1          | 1 |
| GO:0004278 | 1   | 0  | 0     | 0    | 0  | 0     | 0     | 1  | 100   | 21.53 | 0   | 0     | 0    | 1 | 1          | 1          | 1 |
| GO:0004283 | 1   | 0  | 0     | 0    | 0  | 0     | 0     | 0  | 0     | 1     | 100 | 28.22 | 0    | 1 | 1          | 1          | 1 |
| GO:0004286 | 2   | 1  | 50    | 0.57 | 1  | 50    | 14.32 | 0  | 0     | 0     | 0   | 0     | 0    | 1 | 1          | 1          | 1 |
| GO:0004287 | 6   | 6  | 100   | 1.13 | 0  | 0     | 0     | 0  | 0     | 0     | 0   | 0     | 0    | 1 | 1          | 1          | 1 |
| GO:0004289 | 21  | 19 | 90.48 | 1.02 | 2  | 9.52  | 2.73  | 0  | 0     | 0     | 0   | 0     | 0    | 1 | 1          | 1          | 1 |
| GO:0004293 | 1   | 1  | 100   | 1.13 | 0  | 0     | 0     | 0  | 0     | 0     | 0   | 0     | 0    | 1 | 1          | 1          | 1 |
| GO:0004294 | 4   | 4  | 100   | 1.13 | 0  | 0     | 0     | 0  | 0     | 0     | 0   | 0     | 0    | 1 | 1          | 1          | 1 |
| GO:0004295 | 61  | 46 | 75.41 | 0.85 | 2  | 3.28  | 0.94  | 5  | 8.2   | 1.76  | 8   | 13.11 | 3.7  | 1 | 1          | 1          | 1 |
| GO:0004296 | 2   | 2  | 100   | 1.13 | 0  | 0     | 0     | 0  | 0     | 0     | 0   | 0     | 0    | 1 | 1          | 1          | 1 |
| GO:0004299 | 27  | 25 | 92.59 | 1.05 | 0  | 0     | 0     | 2  | 7.41  | 1.59  | 0   | 0     | 0    | 1 | 1          | 1          | 1 |
| GO:0004300 | 8   | 8  | 100   | 1.13 | 0  | 0     | 0     | 0  | 0     | 0     | 0   | 0     | 0    | 1 | 1          | 1          | 1 |
| GO:0004301 | 5   | 5  | 100   | 1.13 | 0  | 0     | 0     | 0  | 0     | 0     | 0   | 0     | 0    | 1 | 1          | 1          | 1 |
| GO:0004303 | 11  | 8  | 72.73 | 0.82 | 0  | 0     | 0     | 1  | 9.09  | 1.96  | 2   | 18.18 | 5.13 | 1 | 1          | 1          | 1 |

|            |    |    |       |      |   |       |      |   |      |       |   |       |       |   |   |   |   |
|------------|----|----|-------|------|---|-------|------|---|------|-------|---|-------|-------|---|---|---|---|
| GO:0004305 | 2  | 2  | 100   | 1.13 | 0 | 0     | 0    | 0 | 0    | 0     | 0 | 0     | 0     | 1 | 1 | 1 | 1 |
| GO:0004308 | 2  | 2  | 100   | 1.13 | 0 | 0     | 0    | 0 | 0    | 0     | 0 | 0     | 0     | 1 | 1 | 1 | 1 |
| GO:0004310 | 5  | 5  | 100   | 1.13 | 0 | 0     | 0    | 0 | 0    | 0     | 0 | 0     | 0     | 1 | 1 | 1 | 1 |
| GO:0004311 | 4  | 4  | 100   | 1.13 | 0 | 0     | 0    | 0 | 0    | 0     | 0 | 0     | 0     | 1 | 1 | 1 | 1 |
| GO:0004312 | 3  | 3  | 100   | 1.13 | 0 | 0     | 0    | 0 | 0    | 0     | 0 | 0     | 0     | 1 | 1 | 1 | 1 |
| GO:0004316 | 2  | 2  | 100   | 1.13 | 0 | 0     | 0    | 0 | 0    | 0     | 0 | 0     | 0     | 1 | 1 | 1 | 1 |
| GO:0004321 | 1  | 1  | 100   | 1.13 | 0 | 0     | 0    | 0 | 0    | 0     | 0 | 0     | 0     | 1 | 1 | 1 | 1 |
| GO:0004324 | 1  | 1  | 100   | 1.13 | 0 | 0     | 0    | 0 | 0    | 0     | 0 | 0     | 0     | 1 | 1 | 1 | 1 |
| GO:0004325 | 4  | 4  | 100   | 1.13 | 0 | 0     | 0    | 0 | 0    | 0     | 0 | 0     | 0     | 1 | 1 | 1 | 1 |
| GO:0004327 | 2  | 2  | 100   | 1.13 | 0 | 0     | 0    | 0 | 0    | 0     | 0 | 0     | 0     | 1 | 1 | 1 | 1 |
| GO:0004329 | 9  | 9  | 100   | 1.13 | 0 | 0     | 0    | 0 | 0    | 0     | 0 | 0     | 0     | 1 | 1 | 1 | 1 |
| GO:0004331 | 4  | 4  | 100   | 1.13 | 0 | 0     | 0    | 0 | 0    | 0     | 0 | 0     | 0     | 1 | 1 | 1 | 1 |
| GO:0004332 | 4  | 2  | 50    | 0.57 | 0 | 0     | 0    | 0 | 0    | 0     | 2 | 50    | 14.11 | 1 | 1 | 1 | 1 |
| GO:0004333 | 2  | 2  | 100   | 1.13 | 0 | 0     | 0    | 0 | 0    | 0     | 0 | 0     | 0     | 1 | 1 | 1 | 1 |
| GO:0004334 | 2  | 2  | 100   | 1.13 | 0 | 0     | 0    | 0 | 0    | 0     | 0 | 0     | 0     | 1 | 1 | 1 | 1 |
| GO:0004335 | 6  | 6  | 100   | 1.13 | 0 | 0     | 0    | 0 | 0    | 0     | 0 | 0     | 0     | 1 | 1 | 1 | 1 |
| GO:0004337 | 2  | 2  | 100   | 1.13 | 0 | 0     | 0    | 0 | 0    | 0     | 0 | 0     | 0     | 1 | 1 | 1 | 1 |
| GO:0004342 | 4  | 4  | 100   | 1.13 | 0 | 0     | 0    | 0 | 0    | 0     | 0 | 0     | 0     | 1 | 1 | 1 | 1 |
| GO:0004343 | 6  | 6  | 100   | 1.13 | 0 | 0     | 0    | 0 | 0    | 0     | 0 | 0     | 0     | 1 | 1 | 1 | 1 |
| GO:0004345 | 4  | 2  | 50    | 0.57 | 0 | 0     | 0    | 2 | 50   | 10.76 | 0 | 0     | 0     | 1 | 1 | 1 | 1 |
| GO:0004346 | 1  | 0  | 0     | 0    | 0 | 0     | 0    | 1 | 100  | 21.53 | 0 | 0     | 0     | 1 | 1 | 1 | 1 |
| GO:0004347 | 4  | 4  | 100   | 1.13 | 0 | 0     | 0    | 0 | 0    | 0     | 0 | 0     | 0     | 1 | 1 | 1 | 1 |
| GO:0004348 | 3  | 0  | 0     | 0    | 1 | 33.33 | 9.54 | 0 | 0    | 0     | 2 | 66.67 | 18.82 | 1 | 1 | 1 | 1 |
| GO:0004349 | 3  | 3  | 100   | 1.13 | 0 | 0     | 0    | 0 | 0    | 0     | 0 | 0     | 0     | 1 | 1 | 1 | 1 |
| GO:0004350 | 3  | 3  | 100   | 1.13 | 0 | 0     | 0    | 0 | 0    | 0     | 0 | 0     | 0     | 1 | 1 | 1 | 1 |
| GO:0004351 | 4  | 4  | 100   | 1.13 | 0 | 0     | 0    | 0 | 0    | 0     | 0 | 0     | 0     | 1 | 1 | 1 | 1 |
| GO:0004353 | 2  | 2  | 100   | 1.13 | 0 | 0     | 0    | 0 | 0    | 0     | 0 | 0     | 0     | 1 | 1 | 1 | 1 |
| GO:0004356 | 5  | 5  | 100   | 1.13 | 0 | 0     | 0    | 0 | 0    | 0     | 0 | 0     | 0     | 1 | 1 | 1 | 1 |
| GO:0004357 | 2  | 2  | 100   | 1.13 | 0 | 0     | 0    | 0 | 0    | 0     | 0 | 0     | 0     | 1 | 1 | 1 | 1 |
| GO:0004359 | 1  | 1  | 100   | 1.13 | 0 | 0     | 0    | 0 | 0    | 0     | 0 | 0     | 0     | 1 | 1 | 1 | 1 |
| GO:0004360 | 1  | 1  | 100   | 1.13 | 0 | 0     | 0    | 0 | 0    | 0     | 0 | 0     | 0     | 1 | 1 | 1 | 1 |
| GO:0004361 | 1  | 1  | 100   | 1.13 | 0 | 0     | 0    | 0 | 0    | 0     | 0 | 0     | 0     | 1 | 1 | 1 | 1 |
| GO:0004362 | 5  | 5  | 100   | 1.13 | 0 | 0     | 0    | 0 | 0    | 0     | 0 | 0     | 0     | 1 | 1 | 1 | 1 |
| GO:0004363 | 3  | 3  | 100   | 1.13 | 0 | 0     | 0    | 0 | 0    | 0     | 0 | 0     | 0     | 1 | 1 | 1 | 1 |
| GO:0004364 | 22 | 20 | 90.91 | 1.03 | 0 | 0     | 0    | 1 | 4.55 | 0.98  | 1 | 4.55  | 1.28  | 1 | 1 | 1 | 1 |
| GO:0004366 | 1  | 0  | 0     | 0    | 0 | 0     | 0    | 1 | 100  | 21.53 | 0 | 0     | 0     | 1 | 1 | 1 | 1 |
| GO:0004367 | 4  | 4  | 100   | 1.13 | 0 | 0     | 0    | 0 | 0    | 0     | 0 | 0     | 0     | 1 | 1 | 1 | 1 |
| GO:0004368 | 1  | 1  | 100   | 1.13 | 0 | 0     | 0    | 0 | 0    | 0     | 0 | 0     | 0     | 1 | 1 | 1 | 1 |
| GO:0004370 | 3  | 3  | 100   | 1.13 | 0 | 0     | 0    | 0 | 0    | 0     | 0 | 0     | 0     | 1 | 1 | 1 | 1 |
| GO:0004371 | 1  | 1  | 100   | 1.13 | 0 | 0     | 0    | 0 | 0    | 0     | 0 | 0     | 0     | 1 | 1 | 1 | 1 |
| GO:0004372 | 5  | 2  | 40    | 0.45 | 0 | 0     | 0    | 3 | 60   | 12.92 | 0 | 0     | 0     | 1 | 1 | 1 | 1 |

|            |     |     |       |      |   |       |      |   |       |       |   |       |       |   |   |   |   |
|------------|-----|-----|-------|------|---|-------|------|---|-------|-------|---|-------|-------|---|---|---|---|
| GO:0004373 | 3   | 3   | 100   | 1.13 | 0 | 0     | 0    | 0 | 0     | 0     | 0 | 0     | 0     | 1 | 1 | 1 | 1 |
| GO:0004374 | 1   | 1   | 100   | 1.13 | 0 | 0     | 0    | 0 | 0     | 0     | 0 | 0     | 0     | 1 | 1 | 1 | 1 |
| GO:0004375 | 1   | 1   | 100   | 1.13 | 0 | 0     | 0    | 0 | 0     | 0     | 0 | 0     | 0     | 1 | 1 | 1 | 1 |
| GO:0004376 | 4   | 4   | 100   | 1.13 | 0 | 0     | 0    | 0 | 0     | 0     | 0 | 0     | 0     | 1 | 1 | 1 | 1 |
| GO:0004379 | 4   | 4   | 100   | 1.13 | 0 | 0     | 0    | 0 | 0     | 0     | 0 | 0     | 0     | 1 | 1 | 1 | 1 |
| GO:0004382 | 1   | 1   | 100   | 1.13 | 0 | 0     | 0    | 0 | 0     | 0     | 0 | 0     | 0     | 1 | 1 | 1 | 1 |
| GO:0004383 | 5   | 5   | 100   | 1.13 | 0 | 0     | 0    | 0 | 0     | 0     | 0 | 0     | 0     | 1 | 1 | 1 | 1 |
| GO:0004384 | 1   | 1   | 100   | 1.13 | 0 | 0     | 0    | 0 | 0     | 0     | 0 | 0     | 0     | 1 | 1 | 1 | 1 |
| GO:0004385 | 7   | 6   | 85.71 | 0.97 | 0 | 0     | 0    | 1 | 14.29 | 3.08  | 0 | 0     | 0     | 1 | 1 | 1 | 1 |
| GO:0004386 | 158 | 146 | 92.41 | 1.05 | 5 | 3.16  | 0.91 | 2 | 1.27  | 0.27  | 5 | 3.16  | 0.89  | 1 | 1 | 1 | 1 |
| GO:0004392 | 7   | 7   | 100   | 1.13 | 0 | 0     | 0    | 0 | 0     | 0     | 0 | 0     | 0     | 1 | 1 | 1 | 1 |
| GO:0004393 | 4   | 4   | 100   | 1.13 | 0 | 0     | 0    | 0 | 0     | 0     | 0 | 0     | 0     | 1 | 1 | 1 | 1 |
| GO:0004394 | 3   | 3   | 100   | 1.13 | 0 | 0     | 0    | 0 | 0     | 0     | 0 | 0     | 0     | 1 | 1 | 1 | 1 |
| GO:0004396 | 12  | 7   | 58.33 | 0.66 | 2 | 16.67 | 4.77 | 1 | 8.33  | 1.79  | 2 | 16.67 | 4.7   | 1 | 1 | 1 | 1 |
| GO:0004397 | 2   | 1   | 50    | 0.57 | 0 | 0     | 0    | 1 | 50    | 10.76 | 0 | 0     | 0     | 1 | 1 | 1 | 1 |
| GO:0004402 | 8   | 7   | 87.5  | 0.99 | 0 | 0     | 0    | 1 | 12.5  | 2.69  | 0 | 0     | 0     | 1 | 1 | 1 | 1 |
| GO:0004407 | 14  | 14  | 100   | 1.13 | 0 | 0     | 0    | 0 | 0     | 0     | 0 | 0     | 0     | 1 | 1 | 1 | 1 |
| GO:0004408 | 3   | 3   | 100   | 1.13 | 0 | 0     | 0    | 0 | 0     | 0     | 0 | 0     | 0     | 1 | 1 | 1 | 1 |
| GO:0004415 | 4   | 4   | 100   | 1.13 | 0 | 0     | 0    | 0 | 0     | 0     | 0 | 0     | 0     | 1 | 1 | 1 | 1 |
| GO:0004416 | 7   | 7   | 100   | 1.13 | 0 | 0     | 0    | 0 | 0     | 0     | 0 | 0     | 0     | 1 | 1 | 1 | 1 |
| GO:0004418 | 5   | 4   | 80    | 0.91 | 1 | 20    | 5.73 | 0 | 0     | 0     | 0 | 0     | 0     | 1 | 1 | 1 | 1 |
| GO:0004419 | 3   | 3   | 100   | 1.13 | 0 | 0     | 0    | 0 | 0     | 0     | 0 | 0     | 0     | 1 | 1 | 1 | 1 |
| GO:0004420 | 3   | 3   | 100   | 1.13 | 0 | 0     | 0    | 0 | 0     | 0     | 0 | 0     | 0     | 1 | 1 | 1 | 1 |
| GO:0004422 | 2   | 2   | 100   | 1.13 | 0 | 0     | 0    | 0 | 0     | 0     | 0 | 0     | 0     | 1 | 1 | 1 | 1 |
| GO:0004423 | 1   | 1   | 100   | 1.13 | 0 | 0     | 0    | 0 | 0     | 0     | 0 | 0     | 0     | 1 | 1 | 1 | 1 |
| GO:0004427 | 6   | 6   | 100   | 1.13 | 0 | 0     | 0    | 0 | 0     | 0     | 0 | 0     | 0     | 1 | 1 | 1 | 1 |
| GO:0004428 | 12  | 11  | 91.67 | 1.04 | 1 | 8.33  | 2.39 | 0 | 0     | 0     | 0 | 0     | 0     | 1 | 1 | 1 | 1 |
| GO:0004429 | 3   | 2   | 66.67 | 0.75 | 1 | 33.33 | 9.54 | 0 | 0     | 0     | 0 | 0     | 0     | 1 | 1 | 1 | 1 |
| GO:0004430 | 3   | 3   | 100   | 1.13 | 0 | 0     | 0    | 0 | 0     | 0     | 0 | 0     | 0     | 1 | 1 | 1 | 1 |
| GO:0004431 | 1   | 1   | 100   | 1.13 | 0 | 0     | 0    | 0 | 0     | 0     | 0 | 0     | 0     | 1 | 1 | 1 | 1 |
| GO:0004435 | 11  | 11  | 100   | 1.13 | 0 | 0     | 0    | 0 | 0     | 0     | 0 | 0     | 0     | 1 | 1 | 1 | 1 |
| GO:0004437 | 33  | 33  | 100   | 1.13 | 0 | 0     | 0    | 0 | 0     | 0     | 0 | 0     | 0     | 1 | 1 | 1 | 1 |
| GO:0004439 | 8   | 8   | 100   | 1.13 | 0 | 0     | 0    | 0 | 0     | 0     | 0 | 0     | 0     | 1 | 1 | 1 | 1 |
| GO:0004441 | 1   | 1   | 100   | 1.13 | 0 | 0     | 0    | 0 | 0     | 0     | 0 | 0     | 0     | 1 | 1 | 1 | 1 |
| GO:0004445 | 8   | 7   | 87.5  | 0.99 | 0 | 0     | 0    | 1 | 12.5  | 2.69  | 0 | 0     | 0     | 1 | 1 | 1 | 1 |
| GO:0004448 | 5   | 1   | 20    | 0.23 | 1 | 20    | 5.73 | 2 | 40    | 8.61  | 1 | 20    | 5.64  | 1 | 1 | 1 | 1 |
| GO:0004449 | 3   | 3   | 100   | 1.13 | 0 | 0     | 0    | 0 | 0     | 0     | 0 | 0     | 0     | 1 | 1 | 1 | 1 |
| GO:0004450 | 16  | 16  | 100   | 1.13 | 0 | 0     | 0    | 0 | 0     | 0     | 0 | 0     | 0     | 1 | 1 | 1 | 1 |
| GO:0004452 | 2   | 1   | 50    | 0.57 | 0 | 0     | 0    | 0 | 0     | 0     | 1 | 50    | 14.11 | 1 | 1 | 1 | 1 |
| GO:0004459 | 9   | 9   | 100   | 1.13 | 0 | 0     | 0    | 0 | 0     | 0     | 0 | 0     | 0     | 1 | 1 | 1 | 1 |
| GO:0004462 | 8   | 7   | 87.5  | 0.99 | 1 | 12.5  | 3.58 | 0 | 0     | 0     | 0 | 0     | 0     | 1 | 1 | 1 | 1 |



|            |    |    |       |      |   |       |       |   |       |       |    |       |       |   |             |   |             |
|------------|----|----|-------|------|---|-------|-------|---|-------|-------|----|-------|-------|---|-------------|---|-------------|
| GO:0004463 | 3  | 3  | 100   | 1.13 | 0 | 0     | 0     | 0 | 0     | 0     | 0  | 0     | 1     | 1 | 1           | 1 |             |
| GO:0004465 | 13 | 10 | 76.92 | 0.87 | 0 | 0     | 0     | 2 | 15.38 | 3.31  | 1  | 7.69  | 2.17  | 1 | 1           | 1 | 1           |
| GO:0004466 | 2  | 2  | 100   | 1.13 | 0 | 0     | 0     | 0 | 0     | 0     | 0  | 0     | 1     | 1 | 1           | 1 |             |
| GO:0004467 | 4  | 3  | 75    | 0.85 | 1 | 25    | 7.16  | 0 | 0     | 0     | 0  | 0     | 1     | 1 | 1           | 1 |             |
| GO:0004469 | 2  | 2  | 100   | 1.13 | 0 | 0     | 0     | 0 | 0     | 0     | 0  | 0     | 1     | 1 | 1           | 1 |             |
| GO:0004470 | 13 | 13 | 100   | 1.13 | 0 | 0     | 0     | 0 | 0     | 0     | 0  | 0     | 1     | 1 | 1           | 1 |             |
| GO:0004471 | 4  | 4  | 100   | 1.13 | 0 | 0     | 0     | 0 | 0     | 0     | 0  | 0     | 1     | 1 | 1           | 1 |             |
| GO:0004473 | 3  | 3  | 100   | 1.13 | 0 | 0     | 0     | 0 | 0     | 0     | 0  | 0     | 1     | 1 | 1           | 1 |             |
| GO:0004476 | 2  | 2  | 100   | 1.13 | 0 | 0     | 0     | 0 | 0     | 0     | 0  | 0     | 1     | 1 | 1           | 1 |             |
| GO:0004477 | 11 | 11 | 100   | 1.13 | 0 | 0     | 0     | 0 | 0     | 0     | 0  | 0     | 1     | 1 | 1           | 1 |             |
| GO:0004478 | 4  | 2  | 50    | 0.57 | 0 | 0     | 0     | 2 | 50    | 10.76 | 0  | 0     | 0     | 1 | 1           | 1 | 1           |
| GO:0004482 | 3  | 0  | 0     | 0    | 3 | 100   | 28.63 | 0 | 0     | 0     | 0  | 0     | 0     | 1 | 0.175770672 | 1 | 1           |
| GO:0004484 | 7  | 7  | 100   | 1.13 | 0 | 0     | 0     | 0 | 0     | 0     | 0  | 0     | 1     | 1 | 1           | 1 |             |
| GO:0004485 | 1  | 1  | 100   | 1.13 | 0 | 0     | 0     | 0 | 0     | 0     | 0  | 0     | 1     | 1 | 1           | 1 |             |
| GO:0004488 | 11 | 11 | 100   | 1.13 | 0 | 0     | 0     | 0 | 0     | 0     | 0  | 0     | 1     | 1 | 1           | 1 |             |
| GO:0004489 | 1  | 1  | 100   | 1.13 | 0 | 0     | 0     | 0 | 0     | 0     | 0  | 0     | 1     | 1 | 1           | 1 |             |
| GO:0004491 | 1  | 1  | 100   | 1.13 | 0 | 0     | 0     | 0 | 0     | 0     | 0  | 0     | 1     | 1 | 1           | 1 |             |
| GO:0004494 | 1  | 1  | 100   | 1.13 | 0 | 0     | 0     | 0 | 0     | 0     | 0  | 0     | 1     | 1 | 1           | 1 |             |
| GO:0004495 | 5  | 1  | 20    | 0.23 | 1 | 20    | 5.73  | 2 | 40    | 8.61  | 1  | 20    | 5.64  | 1 | 1           | 1 | 1           |
| GO:0004496 | 1  | 1  | 100   | 1.13 | 0 | 0     | 0     | 0 | 0     | 0     | 0  | 0     | 1     | 1 | 1           | 1 |             |
| GO:0004497 | 81 | 59 | 72.84 | 0.82 | 2 | 2.47  | 0.71  | 6 | 7.41  | 1.59  | 14 | 17.28 | 4.88  | 1 | 1           | 1 | 0.009987669 |
| GO:0004499 | 5  | 3  | 60    | 0.68 | 0 | 0     | 0     | 0 | 0     | 0     | 2  | 40    | 11.29 | 1 | 1           | 1 | 1           |
| GO:0004500 | 1  | 1  | 100   | 1.13 | 0 | 0     | 0     | 0 | 0     | 0     | 0  | 0     | 1     | 1 | 1           | 1 |             |
| GO:0004503 | 1  | 0  | 0     | 0    | 0 | 0     | 0     | 0 | 0     | 0     | 1  | 100   | 28.22 | 1 | 1           | 1 | 1           |
| GO:0004504 | 1  | 1  | 100   | 1.13 | 0 | 0     | 0     | 0 | 0     | 0     | 0  | 0     | 1     | 1 | 1           | 1 |             |
| GO:0004505 | 2  | 2  | 100   | 1.13 | 0 | 0     | 0     | 0 | 0     | 0     | 0  | 0     | 1     | 1 | 1           | 1 |             |
| GO:0004506 | 2  | 2  | 100   | 1.13 | 0 | 0     | 0     | 0 | 0     | 0     | 0  | 0     | 1     | 1 | 1           | 1 |             |
| GO:0004508 | 1  | 0  | 0     | 0    | 0 | 0     | 0     | 1 | 100   | 21.53 | 0  | 0     | 0     | 1 | 1           | 1 | 1           |
| GO:0004510 | 1  | 1  | 100   | 1.13 | 0 | 0     | 0     | 0 | 0     | 0     | 0  | 0     | 1     | 1 | 1           | 1 |             |
| GO:0004512 | 2  | 2  | 100   | 1.13 | 0 | 0     | 0     | 0 | 0     | 0     | 0  | 0     | 1     | 1 | 1           | 1 |             |
| GO:0004513 | 1  | 1  | 100   | 1.13 | 0 | 0     | 0     | 0 | 0     | 0     | 0  | 0     | 1     | 1 | 1           | 1 |             |
| GO:0004514 | 1  | 1  | 100   | 1.13 | 0 | 0     | 0     | 0 | 0     | 0     | 0  | 0     | 1     | 1 | 1           | 1 |             |
| GO:0004516 | 2  | 2  | 100   | 1.13 | 0 | 0     | 0     | 0 | 0     | 0     | 0  | 0     | 1     | 1 | 1           | 1 |             |
| GO:0004517 | 2  | 2  | 100   | 1.13 | 0 | 0     | 0     | 0 | 0     | 0     | 0  | 0     | 1     | 1 | 1           | 1 |             |
| GO:0004518 | 71 | 59 | 83.1  | 0.94 | 4 | 5.63  | 1.61  | 7 | 9.86  | 2.12  | 1  | 1.41  | 0.4   | 1 | 1           | 1 | 1           |
| GO:0004519 | 66 | 54 | 81.82 | 0.93 | 5 | 7.58  | 2.17  | 4 | 6.06  | 1.3   | 3  | 4.55  | 1.28  | 1 | 1           | 1 | 1           |
| GO:0004520 | 1  | 1  | 100   | 1.13 | 0 | 0     | 0     | 0 | 0     | 0     | 0  | 0     | 1     | 1 | 1           | 1 |             |
| GO:0004521 | 1  | 1  | 100   | 1.13 | 0 | 0     | 0     | 0 | 0     | 0     | 0  | 0     | 1     | 1 | 1           | 1 |             |
| GO:0004522 | 6  | 2  | 33.33 | 0.38 | 2 | 33.33 | 9.54  | 1 | 16.67 | 3.59  | 1  | 16.67 | 4.7   | 1 | 1           | 1 | 1           |
| GO:0004523 | 2  | 2  | 100   | 1.13 | 0 | 0     | 0     | 0 | 0     | 0     | 0  | 0     | 1     | 1 | 1           | 1 |             |
| GO:0004524 | 1  | 1  | 100   | 1.13 | 0 | 0     | 0     | 0 | 0     | 0     | 0  | 0     | 1     | 1 | 1           | 1 |             |

|            |    |    |       |      |   |       |       |   |       |       |   |       |       |   |   |   |             |
|------------|----|----|-------|------|---|-------|-------|---|-------|-------|---|-------|-------|---|---|---|-------------|
| GO:0004525 | 5  | 5  | 100   | 1.13 | 0 | 0     | 0     | 0 | 0     | 0     | 0 | 0     | 0     | 1 | 1 | 1 | 1           |
| GO:0004526 | 10 | 9  | 90    | 1.02 | 1 | 10    | 2.86  | 0 | 0     | 0     | 0 | 0     | 0     | 1 | 1 | 1 | 1           |
| GO:0004527 | 49 | 46 | 93.88 | 1.06 | 1 | 2.04  | 0.58  | 2 | 4.08  | 0.88  | 0 | 0     | 0     | 1 | 1 | 1 | 1           |
| GO:0004528 | 2  | 2  | 100   | 1.13 | 0 | 0     | 0     | 0 | 0     | 0     | 0 | 0     | 0     | 1 | 1 | 1 | 1           |
| GO:0004531 | 3  | 2  | 66.67 | 0.75 | 1 | 33.33 | 9.54  | 0 | 0     | 0     | 0 | 0     | 0     | 1 | 1 | 1 | 1           |
| GO:0004536 | 2  | 1  | 50    | 0.57 | 0 | 0     | 0     | 1 | 50    | 10.76 | 0 | 0     | 0     | 1 | 1 | 1 | 1           |
| GO:0004540 | 6  | 6  | 100   | 1.13 | 0 | 0     | 0     | 0 | 0     | 0     | 0 | 0     | 0     | 1 | 1 | 1 | 1           |
| GO:0004550 | 16 | 14 | 87.5  | 0.99 | 1 | 6.25  | 1.79  | 1 | 6.25  | 1.35  | 0 | 0     | 0     | 1 | 1 | 1 | 1           |
| GO:0004551 | 2  | 2  | 100   | 1.13 | 0 | 0     | 0     | 0 | 0     | 0     | 0 | 0     | 0     | 1 | 1 | 1 | 1           |
| GO:0004553 | 39 | 34 | 87.18 | 0.99 | 0 | 0     | 0     | 1 | 2.56  | 0.55  | 4 | 10.26 | 2.89  | 1 | 1 | 1 | 1           |
| GO:0004555 | 1  | 1  | 100   | 1.13 | 0 | 0     | 0     | 0 | 0     | 0     | 0 | 0     | 0     | 1 | 1 | 1 | 1           |
| GO:0004556 | 9  | 8  | 88.89 | 1.01 | 0 | 0     | 0     | 0 | 0     | 0     | 1 | 11.11 | 3.14  | 1 | 1 | 1 | 1           |
| GO:0004557 | 5  | 0  | 0     | 0    | 0 | 0     | 0     | 1 | 20    | 4.31  | 4 | 80    | 22.58 | 1 | 1 | 1 | 0.039629347 |
| GO:0004558 | 7  | 7  | 100   | 1.13 | 0 | 0     | 0     | 0 | 0     | 0     | 0 | 0     | 0     | 1 | 1 | 1 | 1           |
| GO:0004559 | 15 | 14 | 93.33 | 1.06 | 1 | 6.67  | 1.91  | 0 | 0     | 0     | 0 | 0     | 0     | 1 | 1 | 1 | 1           |
| GO:0004560 | 12 | 12 | 100   | 1.13 | 0 | 0     | 0     | 0 | 0     | 0     | 0 | 0     | 0     | 1 | 1 | 1 | 1           |
| GO:0004563 | 15 | 15 | 100   | 1.13 | 0 | 0     | 0     | 0 | 0     | 0     | 0 | 0     | 0     | 1 | 1 | 1 | 1           |
| GO:0004565 | 8  | 8  | 100   | 1.13 | 0 | 0     | 0     | 0 | 0     | 0     | 0 | 0     | 0     | 1 | 1 | 1 | 1           |
| GO:0004566 | 7  | 5  | 71.43 | 0.81 | 0 | 0     | 0     | 2 | 28.57 | 6.15  | 0 | 0     | 0     | 1 | 1 | 1 | 1           |
| GO:0004567 | 3  | 3  | 100   | 1.13 | 0 | 0     | 0     | 0 | 0     | 0     | 0 | 0     | 0     | 1 | 1 | 1 | 1           |
| GO:0004568 | 1  | 0  | 0     | 0    | 0 | 0     | 0     | 0 | 0     | 0     | 1 | 100   | 28.22 | 1 | 1 | 1 | 1           |
| GO:0004571 | 12 | 12 | 100   | 1.13 | 0 | 0     | 0     | 0 | 0     | 0     | 0 | 0     | 0     | 1 | 1 | 1 | 1           |
| GO:0004572 | 1  | 1  | 100   | 1.13 | 0 | 0     | 0     | 0 | 0     | 0     | 0 | 0     | 0     | 1 | 1 | 1 | 1           |
| GO:0004573 | 2  | 2  | 100   | 1.13 | 0 | 0     | 0     | 0 | 0     | 0     | 0 | 0     | 0     | 1 | 1 | 1 | 1           |
| GO:0004576 | 10 | 10 | 100   | 1.13 | 0 | 0     | 0     | 0 | 0     | 0     | 0 | 0     | 0     | 1 | 1 | 1 | 1           |
| GO:0004579 | 10 | 10 | 100   | 1.13 | 0 | 0     | 0     | 0 | 0     | 0     | 0 | 0     | 0     | 1 | 1 | 1 | 1           |
| GO:0004580 | 4  | 4  | 100   | 1.13 | 0 | 0     | 0     | 0 | 0     | 0     | 0 | 0     | 0     | 1 | 1 | 1 | 1           |
| GO:0004582 | 2  | 2  | 100   | 1.13 | 0 | 0     | 0     | 0 | 0     | 0     | 0 | 0     | 0     | 1 | 1 | 1 | 1           |
| GO:0004585 | 1  | 0  | 0     | 0    | 0 | 0     | 0     | 1 | 100   | 21.53 | 0 | 0     | 0     | 1 | 1 | 1 | 1           |
| GO:0004586 | 2  | 2  | 100   | 1.13 | 0 | 0     | 0     | 0 | 0     | 0     | 0 | 0     | 0     | 1 | 1 | 1 | 1           |
| GO:0004587 | 2  | 2  | 100   | 1.13 | 0 | 0     | 0     | 0 | 0     | 0     | 0 | 0     | 0     | 1 | 1 | 1 | 1           |
| GO:0004588 | 1  | 1  | 100   | 1.13 | 0 | 0     | 0     | 0 | 0     | 0     | 0 | 0     | 0     | 1 | 1 | 1 | 1           |
| GO:0004590 | 1  | 1  | 100   | 1.13 | 0 | 0     | 0     | 0 | 0     | 0     | 0 | 0     | 0     | 1 | 1 | 1 | 1           |
| GO:0004591 | 4  | 4  | 100   | 1.13 | 0 | 0     | 0     | 0 | 0     | 0     | 0 | 0     | 0     | 1 | 1 | 1 | 1           |
| GO:0004594 | 2  | 2  | 100   | 1.13 | 0 | 0     | 0     | 0 | 0     | 0     | 0 | 0     | 0     | 1 | 1 | 1 | 1           |
| GO:0004595 | 4  | 4  | 100   | 1.13 | 0 | 0     | 0     | 0 | 0     | 0     | 0 | 0     | 0     | 1 | 1 | 1 | 1           |
| GO:0004597 | 8  | 5  | 62.5  | 0.71 | 3 | 37.5  | 10.74 | 0 | 0     | 0     | 0 | 0     | 0     | 1 | 1 | 1 | 1           |
| GO:0004600 | 16 | 15 | 93.75 | 1.06 | 0 | 0     | 0     | 0 | 0     | 0     | 1 | 6.25  | 1.76  | 1 | 1 | 1 | 1           |
| GO:0004601 | 57 | 53 | 92.98 | 1.05 | 1 | 1.75  | 0.5   | 3 | 5.26  | 1.13  | 0 | 0     | 0     | 1 | 1 | 1 | 1           |
| GO:0004602 | 6  | 4  | 66.67 | 0.75 | 1 | 16.67 | 4.77  | 1 | 16.67 | 3.59  | 0 | 0     | 0     | 1 | 1 | 1 | 1           |
| GO:0004603 | 1  | 1  | 100   | 1.13 | 0 | 0     | 0     | 0 | 0     | 0     | 0 | 0     | 0     | 1 | 1 | 1 | 1           |

|            |    |    |       |      |   |       |      |   |      |      |   |   |      |   |   |   |   |
|------------|----|----|-------|------|---|-------|------|---|------|------|---|---|------|---|---|---|---|
| GO:0004605 | 3  | 3  | 100   | 1.13 | 0 | 0     | 0    | 0 | 0    | 0    | 0 | 0 | 0    | 1 | 1 | 1 | 1 |
| GO:0004607 | 3  | 3  | 100   | 1.13 | 0 | 0     | 0    | 0 | 0    | 0    | 0 | 0 | 0    | 1 | 1 | 1 | 1 |
| GO:0004609 | 4  | 4  | 100   | 1.13 | 0 | 0     | 0    | 0 | 0    | 0    | 0 | 0 | 0    | 1 | 1 | 1 | 1 |
| GO:0004610 | 4  | 4  | 100   | 1.13 | 0 | 0     | 0    | 0 | 0    | 0    | 0 | 0 | 0    | 1 | 1 | 1 | 1 |
| GO:0004613 | 4  | 4  | 100   | 1.13 | 0 | 0     | 0    | 0 | 0    | 0    | 0 | 0 | 0    | 1 | 1 | 1 | 1 |
| GO:0004614 | 6  | 6  | 100   | 1.13 | 0 | 0     | 0    | 0 | 0    | 0    | 0 | 0 | 0    | 1 | 1 | 1 | 1 |
| GO:0004615 | 8  | 8  | 100   | 1.13 | 0 | 0     | 0    | 0 | 0    | 0    | 0 | 0 | 0    | 1 | 1 | 1 | 1 |
| GO:0004616 | 3  | 3  | 100   | 1.13 | 0 | 0     | 0    | 0 | 0    | 0    | 0 | 0 | 0    | 1 | 1 | 1 | 1 |
| GO:0004618 | 3  | 3  | 100   | 1.13 | 0 | 0     | 0    | 0 | 0    | 0    | 0 | 0 | 0    | 1 | 1 | 1 | 1 |
| GO:0004619 | 5  | 3  | 60    | 0.68 | 0 | 0     | 0    | 2 | 40   | 8.61 | 0 | 0 | 0    | 1 | 1 | 1 | 1 |
| GO:0004620 | 3  | 2  | 66.67 | 0.75 | 1 | 33.33 | 9.54 | 0 | 0    | 0    | 0 | 0 | 0    | 1 | 1 | 1 | 1 |
| GO:0004621 | 1  | 1  | 100   | 1.13 | 0 | 0     | 0    | 0 | 0    | 0    | 0 | 0 | 0    | 1 | 1 | 1 | 1 |
| GO:0004622 | 5  | 4  | 80    | 0.91 | 1 | 20    | 5.73 | 0 | 0    | 0    | 0 | 0 | 0    | 1 | 1 | 1 | 1 |
| GO:0004623 | 20 | 15 | 75    | 0.85 | 3 | 15    | 4.29 | 1 | 5    | 1.08 | 1 | 5 | 1.41 | 1 | 1 | 1 | 1 |
| GO:0004624 | 2  | 2  | 100   | 1.13 | 0 | 0     | 0    | 0 | 0    | 0    | 0 | 0 | 0    | 1 | 1 | 1 | 1 |
| GO:0004625 | 2  | 2  | 100   | 1.13 | 0 | 0     | 0    | 0 | 0    | 0    | 0 | 0 | 0    | 1 | 1 | 1 | 1 |
| GO:0004626 | 2  | 2  | 100   | 1.13 | 0 | 0     | 0    | 0 | 0    | 0    | 0 | 0 | 0    | 1 | 1 | 1 | 1 |
| GO:0004627 | 2  | 2  | 100   | 1.13 | 0 | 0     | 0    | 0 | 0    | 0    | 0 | 0 | 0    | 1 | 1 | 1 | 1 |
| GO:0004628 | 2  | 2  | 100   | 1.13 | 0 | 0     | 0    | 0 | 0    | 0    | 0 | 0 | 0    | 1 | 1 | 1 | 1 |
| GO:0004629 | 18 | 17 | 94.44 | 1.07 | 0 | 0     | 0    | 1 | 5.56 | 1.2  | 0 | 0 | 0    | 1 | 1 | 1 | 1 |
| GO:0004630 | 2  | 2  | 100   | 1.13 | 0 | 0     | 0    | 0 | 0    | 0    | 0 | 0 | 0    | 1 | 1 | 1 | 1 |
| GO:0004631 | 2  | 2  | 100   | 1.13 | 0 | 0     | 0    | 0 | 0    | 0    | 0 | 0 | 0    | 1 | 1 | 1 | 1 |
| GO:0004634 | 6  | 6  | 100   | 1.13 | 0 | 0     | 0    | 0 | 0    | 0    | 0 | 0 | 0    | 1 | 1 | 1 | 1 |
| GO:0004637 | 9  | 9  | 100   | 1.13 | 0 | 0     | 0    | 0 | 0    | 0    | 0 | 0 | 0    | 1 | 1 | 1 | 1 |
| GO:0004638 | 7  | 7  | 100   | 1.13 | 0 | 0     | 0    | 0 | 0    | 0    | 0 | 0 | 0    | 1 | 1 | 1 | 1 |
| GO:0004639 | 7  | 7  | 100   | 1.13 | 0 | 0     | 0    | 0 | 0    | 0    | 0 | 0 | 0    | 1 | 1 | 1 | 1 |
| GO:0004641 | 6  | 6  | 100   | 1.13 | 0 | 0     | 0    | 0 | 0    | 0    | 0 | 0 | 0    | 1 | 1 | 1 | 1 |
| GO:0004643 | 4  | 4  | 100   | 1.13 | 0 | 0     | 0    | 0 | 0    | 0    | 0 | 0 | 0    | 1 | 1 | 1 | 1 |
| GO:0004644 | 6  | 6  | 100   | 1.13 | 0 | 0     | 0    | 0 | 0    | 0    | 0 | 0 | 0    | 1 | 1 | 1 | 1 |
| GO:0004645 | 13 | 13 | 100   | 1.13 | 0 | 0     | 0    | 0 | 0    | 0    | 0 | 0 | 0    | 1 | 1 | 1 | 1 |
| GO:0004646 | 2  | 2  | 100   | 1.13 | 0 | 0     | 0    | 0 | 0    | 0    | 0 | 0 | 0    | 1 | 1 | 1 | 1 |
| GO:0004647 | 1  | 1  | 100   | 1.13 | 0 | 0     | 0    | 0 | 0    | 0    | 0 | 0 | 0    | 1 | 1 | 1 | 1 |
| GO:0004648 | 2  | 2  | 100   | 1.13 | 0 | 0     | 0    | 0 | 0    | 0    | 0 | 0 | 0    | 1 | 1 | 1 | 1 |
| GO:0004649 | 2  | 2  | 100   | 1.13 | 0 | 0     | 0    | 0 | 0    | 0    | 0 | 0 | 0    | 1 | 1 | 1 | 1 |
| GO:0004652 | 1  | 1  | 100   | 1.13 | 0 | 0     | 0    | 0 | 0    | 0    | 0 | 0 | 0    | 1 | 1 | 1 | 1 |
| GO:0004653 | 12 | 12 | 100   | 1.13 | 0 | 0     | 0    | 0 | 0    | 0    | 0 | 0 | 0    | 1 | 1 | 1 | 1 |
| GO:0004654 | 1  | 1  | 100   | 1.13 | 0 | 0     | 0    | 0 | 0    | 0    | 0 | 0 | 0    | 1 | 1 | 1 | 1 |
| GO:0004655 | 5  | 5  | 100   | 1.13 | 0 | 0     | 0    | 0 | 0    | 0    | 0 | 0 | 0    | 1 | 1 | 1 | 1 |
| GO:0004656 | 13 | 13 | 100   | 1.13 | 0 | 0     | 0    | 0 | 0    | 0    | 0 | 0 | 0    | 1 | 1 | 1 | 1 |
| GO:0004657 | 3  | 3  | 100   | 1.13 | 0 | 0     | 0    | 0 | 0    | 0    | 0 | 0 | 0    | 1 | 1 | 1 | 1 |
| GO:0004658 | 1  | 1  | 100   | 1.13 | 0 | 0     | 0    | 0 | 0    | 0    | 0 | 0 | 0    | 1 | 1 | 1 | 1 |

|            |     |     |       |      |   |      |      |    |      |      |   |      |      |             |   |   |   |
|------------|-----|-----|-------|------|---|------|------|----|------|------|---|------|------|-------------|---|---|---|
| GO:0004659 | 2   | 2   | 100   | 1.13 | 0 | 0    | 0    | 0  | 0    | 0    | 0 | 0    | 0    | 1           | 1 | 1 | 1 |
| GO:0004660 | 1   | 1   | 100   | 1.13 | 0 | 0    | 0    | 0  | 0    | 0    | 0 | 0    | 0    | 1           | 1 | 1 | 1 |
| GO:0004661 | 1   | 1   | 100   | 1.13 | 0 | 0    | 0    | 0  | 0    | 0    | 0 | 0    | 0    | 1           | 1 | 1 | 1 |
| GO:0004662 | 1   | 1   | 100   | 1.13 | 0 | 0    | 0    | 0  | 0    | 0    | 0 | 0    | 0    | 1           | 1 | 1 | 1 |
| GO:0004663 | 1   | 1   | 100   | 1.13 | 0 | 0    | 0    | 0  | 0    | 0    | 0 | 0    | 0    | 1           | 1 | 1 | 1 |
| GO:0004664 | 1   | 1   | 100   | 1.13 | 0 | 0    | 0    | 0  | 0    | 0    | 0 | 0    | 0    | 1           | 1 | 1 | 1 |
| GO:0004666 | 7   | 7   | 100   | 1.13 | 0 | 0    | 0    | 0  | 0    | 0    | 0 | 0    | 0    | 1           | 1 | 1 | 1 |
| GO:0004667 | 4   | 3   | 75    | 0.85 | 1 | 25   | 7.16 | 0  | 0    | 0    | 0 | 0    | 0    | 1           | 1 | 1 | 1 |
| GO:0004668 | 4   | 4   | 100   | 1.13 | 0 | 0    | 0    | 0  | 0    | 0    | 0 | 0    | 0    | 1           | 1 | 1 | 1 |
| GO:0004671 | 1   | 1   | 100   | 1.13 | 0 | 0    | 0    | 0  | 0    | 0    | 0 | 0    | 0    | 1           | 1 | 1 | 1 |
| GO:0004672 | 474 | 437 | 92.19 | 1.04 | 7 | 1.48 | 0.42 | 23 | 4.85 | 1.04 | 7 | 1.48 | 0.42 | 1           | 1 | 1 | 1 |
| GO:0004673 | 8   | 8   | 100   | 1.13 | 0 | 0    | 0    | 0  | 0    | 0    | 0 | 0    | 0    | 1           | 1 | 1 | 1 |
| GO:0004674 | 541 | 503 | 92.98 | 1.05 | 9 | 1.66 | 0.48 | 20 | 3.7  | 0.8  | 9 | 1.66 | 0.47 | 0.069349507 | 1 | 1 | 1 |
| GO:0004675 | 29  | 29  | 100   | 1.13 | 0 | 0    | 0    | 0  | 0    | 0    | 0 | 0    | 0    | 1           | 1 | 1 | 1 |
| GO:0004676 | 21  | 21  | 100   | 1.13 | 0 | 0    | 0    | 0  | 0    | 0    | 0 | 0    | 0    | 1           | 1 | 1 | 1 |
| GO:0004677 | 17  | 17  | 100   | 1.13 | 0 | 0    | 0    | 0  | 0    | 0    | 0 | 0    | 0    | 1           | 1 | 1 | 1 |
| GO:0004678 | 17  | 17  | 100   | 1.13 | 0 | 0    | 0    | 0  | 0    | 0    | 0 | 0    | 0    | 1           | 1 | 1 | 1 |
| GO:0004679 | 21  | 21  | 100   | 1.13 | 0 | 0    | 0    | 0  | 0    | 0    | 0 | 0    | 0    | 1           | 1 | 1 | 1 |
| GO:0004680 | 17  | 17  | 100   | 1.13 | 0 | 0    | 0    | 0  | 0    | 0    | 0 | 0    | 0    | 1           | 1 | 1 | 1 |
| GO:0004681 | 17  | 17  | 100   | 1.13 | 0 | 0    | 0    | 0  | 0    | 0    | 0 | 0    | 0    | 1           | 1 | 1 | 1 |
| GO:0004682 | 19  | 19  | 100   | 1.13 | 0 | 0    | 0    | 0  | 0    | 0    | 0 | 0    | 0    | 1           | 1 | 1 | 1 |
| GO:0004683 | 19  | 19  | 100   | 1.13 | 0 | 0    | 0    | 0  | 0    | 0    | 0 | 0    | 0    | 1           | 1 | 1 | 1 |
| GO:0004684 | 4   | 4   | 100   | 1.13 | 0 | 0    | 0    | 0  | 0    | 0    | 0 | 0    | 0    | 1           | 1 | 1 | 1 |
| GO:0004685 | 7   | 7   | 100   | 1.13 | 0 | 0    | 0    | 0  | 0    | 0    | 0 | 0    | 0    | 1           | 1 | 1 | 1 |
| GO:0004686 | 17  | 17  | 100   | 1.13 | 0 | 0    | 0    | 0  | 0    | 0    | 0 | 0    | 0    | 1           | 1 | 1 | 1 |
| GO:0004688 | 17  | 17  | 100   | 1.13 | 0 | 0    | 0    | 0  | 0    | 0    | 0 | 0    | 0    | 1           | 1 | 1 | 1 |
| GO:0004689 | 6   | 6   | 100   | 1.13 | 0 | 0    | 0    | 0  | 0    | 0    | 0 | 0    | 0    | 1           | 1 | 1 | 1 |
| GO:0004690 | 17  | 17  | 100   | 1.13 | 0 | 0    | 0    | 0  | 0    | 0    | 0 | 0    | 0    | 1           | 1 | 1 | 1 |
| GO:0004691 | 17  | 17  | 100   | 1.13 | 0 | 0    | 0    | 0  | 0    | 0    | 0 | 0    | 0    | 1           | 1 | 1 | 1 |
| GO:0004692 | 18  | 18  | 100   | 1.13 | 0 | 0    | 0    | 0  | 0    | 0    | 0 | 0    | 0    | 1           | 1 | 1 | 1 |
| GO:0004693 | 41  | 41  | 100   | 1.13 | 0 | 0    | 0    | 0  | 0    | 0    | 0 | 0    | 0    | 1           | 1 | 1 | 1 |
| GO:0004694 | 17  | 17  | 100   | 1.13 | 0 | 0    | 0    | 0  | 0    | 0    | 0 | 0    | 0    | 1           | 1 | 1 | 1 |
| GO:0004695 | 17  | 17  | 100   | 1.13 | 0 | 0    | 0    | 0  | 0    | 0    | 0 | 0    | 0    | 1           | 1 | 1 | 1 |
| GO:0004696 | 19  | 19  | 100   | 1.13 | 0 | 0    | 0    | 0  | 0    | 0    | 0 | 0    | 0    | 1           | 1 | 1 | 1 |
| GO:0004697 | 18  | 18  | 100   | 1.13 | 0 | 0    | 0    | 0  | 0    | 0    | 0 | 0    | 0    | 1           | 1 | 1 | 1 |
| GO:0004698 | 18  | 18  | 100   | 1.13 | 0 | 0    | 0    | 0  | 0    | 0    | 0 | 0    | 0    | 1           | 1 | 1 | 1 |
| GO:0004700 | 17  | 17  | 100   | 1.13 | 0 | 0    | 0    | 0  | 0    | 0    | 0 | 0    | 0    | 1           | 1 | 1 | 1 |
| GO:0004701 | 17  | 17  | 100   | 1.13 | 0 | 0    | 0    | 0  | 0    | 0    | 0 | 0    | 0    | 1           | 1 | 1 | 1 |
| GO:0004702 | 31  | 31  | 100   | 1.13 | 0 | 0    | 0    | 0  | 0    | 0    | 0 | 0    | 0    | 1           | 1 | 1 | 1 |
| GO:0004703 | 19  | 19  | 100   | 1.13 | 0 | 0    | 0    | 0  | 0    | 0    | 0 | 0    | 0    | 1           | 1 | 1 | 1 |
| GO:0004704 | 18  | 18  | 100   | 1.13 | 0 | 0    | 0    | 0  | 0    | 0    | 0 | 0    | 0    | 1           | 1 | 1 | 1 |

|            |     |     |       |      |   |       |      |    |       |      |   |      |      |   |   |             |   |
|------------|-----|-----|-------|------|---|-------|------|----|-------|------|---|------|------|---|---|-------------|---|
| GO:0004705 | 19  | 19  | 100   | 1.13 | 0 | 0     | 0    | 0  | 0     | 0    | 0 | 0    | 0    | 1 | 1 | 1           | 1 |
| GO:0004706 | 17  | 17  | 100   | 1.13 | 0 | 0     | 0    | 0  | 0     | 0    | 0 | 0    | 0    | 1 | 1 | 1           | 1 |
| GO:0004707 | 33  | 33  | 100   | 1.13 | 0 | 0     | 0    | 0  | 0     | 0    | 0 | 0    | 0    | 1 | 1 | 1           | 1 |
| GO:0004708 | 22  | 22  | 100   | 1.13 | 0 | 0     | 0    | 0  | 0     | 0    | 0 | 0    | 0    | 1 | 1 | 1           | 1 |
| GO:0004709 | 18  | 18  | 100   | 1.13 | 0 | 0     | 0    | 0  | 0     | 0    | 0 | 0    | 0    | 1 | 1 | 1           | 1 |
| GO:0004710 | 17  | 17  | 100   | 1.13 | 0 | 0     | 0    | 0  | 0     | 0    | 0 | 0    | 0    | 1 | 1 | 1           | 1 |
| GO:0004711 | 17  | 17  | 100   | 1.13 | 0 | 0     | 0    | 0  | 0     | 0    | 0 | 0    | 0    | 1 | 1 | 1           | 1 |
| GO:0004712 | 19  | 19  | 100   | 1.13 | 0 | 0     | 0    | 0  | 0     | 0    | 0 | 0    | 0    | 1 | 1 | 1           | 1 |
| GO:0004713 | 473 | 433 | 91.54 | 1.04 | 9 | 1.9   | 0.54 | 24 | 5.07  | 1.09 | 7 | 1.48 | 0.42 | 1 | 1 | 1           | 1 |
| GO:0004714 | 57  | 44  | 77.19 | 0.87 | 0 | 0     | 0    | 10 | 17.54 | 3.78 | 3 | 5.26 | 1.49 | 1 | 1 | 1           | 1 |
| GO:0004715 | 17  | 17  | 100   | 1.13 | 0 | 0     | 0    | 0  | 0     | 0    | 0 | 0    | 0    | 1 | 1 | 1           | 1 |
| GO:0004716 | 19  | 19  | 100   | 1.13 | 0 | 0     | 0    | 0  | 0     | 0    | 0 | 0    | 0    | 1 | 1 | 1           | 1 |
| GO:0004717 | 17  | 17  | 100   | 1.13 | 0 | 0     | 0    | 0  | 0     | 0    | 0 | 0    | 0    | 1 | 1 | 1           | 1 |
| GO:0004718 | 22  | 22  | 100   | 1.13 | 0 | 0     | 0    | 0  | 0     | 0    | 0 | 0    | 0    | 1 | 1 | 1           | 1 |
| GO:0004719 | 4   | 4   | 100   | 1.13 | 0 | 0     | 0    | 0  | 0     | 0    | 0 | 0    | 0    | 1 | 1 | 1           | 1 |
| GO:0004720 | 18  | 8   | 44.44 | 0.5  | 4 | 22.22 | 6.36 | 6  | 33.33 | 7.18 | 0 | 0    | 0    | 1 | 1 | 0.580757432 | 1 |
| GO:0004721 | 116 | 112 | 96.55 | 1.09 | 1 | 0.86  | 0.25 | 0  | 0     | 0    | 3 | 2.59 | 0.73 | 1 | 1 | 1           | 1 |
| GO:0004722 | 53  | 50  | 94.34 | 1.07 | 0 | 0     | 0    | 2  | 3.77  | 0.81 | 1 | 1.89 | 0.53 | 1 | 1 | 1           | 1 |
| GO:0004724 | 2   | 2   | 100   | 1.13 | 0 | 0     | 0    | 0  | 0     | 0    | 0 | 0    | 0    | 1 | 1 | 1           | 1 |
| GO:0004725 | 90  | 86  | 95.56 | 1.08 | 1 | 1.11  | 0.32 | 0  | 0     | 0    | 3 | 3.33 | 0.94 | 1 | 1 | 1           | 1 |
| GO:0004726 | 5   | 5   | 100   | 1.13 | 0 | 0     | 0    | 0  | 0     | 0    | 0 | 0    | 0    | 1 | 1 | 1           | 1 |
| GO:0004727 | 12  | 11  | 91.67 | 1.04 | 1 | 8.33  | 2.39 | 0  | 0     | 0    | 0 | 0    | 0    | 1 | 1 | 1           | 1 |
| GO:0004729 | 1   | 1   | 100   | 1.13 | 0 | 0     | 0    | 0  | 0     | 0    | 0 | 0    | 0    | 1 | 1 | 1           | 1 |
| GO:0004730 | 18  | 17  | 94.44 | 1.07 | 0 | 0     | 0    | 1  | 5.56  | 1.2  | 0 | 0    | 0    | 1 | 1 | 1           | 1 |
| GO:0004731 | 2   | 2   | 100   | 1.13 | 0 | 0     | 0    | 0  | 0     | 0    | 0 | 0    | 0    | 1 | 1 | 1           | 1 |
| GO:0004733 | 1   | 1   | 100   | 1.13 | 0 | 0     | 0    | 0  | 0     | 0    | 0 | 0    | 0    | 1 | 1 | 1           | 1 |
| GO:0004735 | 3   | 3   | 100   | 1.13 | 0 | 0     | 0    | 0  | 0     | 0    | 0 | 0    | 0    | 1 | 1 | 1           | 1 |
| GO:0004736 | 3   | 3   | 100   | 1.13 | 0 | 0     | 0    | 0  | 0     | 0    | 0 | 0    | 0    | 1 | 1 | 1           | 1 |
| GO:0004738 | 5   | 5   | 100   | 1.13 | 0 | 0     | 0    | 0  | 0     | 0    | 0 | 0    | 0    | 1 | 1 | 1           | 1 |
| GO:0004739 | 8   | 8   | 100   | 1.13 | 0 | 0     | 0    | 0  | 0     | 0    | 0 | 0    | 0    | 1 | 1 | 1           | 1 |
| GO:0004740 | 5   | 5   | 100   | 1.13 | 0 | 0     | 0    | 0  | 0     | 0    | 0 | 0    | 0    | 1 | 1 | 1           | 1 |
| GO:0004741 | 1   | 1   | 100   | 1.13 | 0 | 0     | 0    | 0  | 0     | 0    | 0 | 0    | 0    | 1 | 1 | 1           | 1 |
| GO:0004742 | 1   | 1   | 100   | 1.13 | 0 | 0     | 0    | 0  | 0     | 0    | 0 | 0    | 0    | 1 | 1 | 1           | 1 |
| GO:0004743 | 7   | 7   | 100   | 1.13 | 0 | 0     | 0    | 0  | 0     | 0    | 0 | 0    | 0    | 1 | 1 | 1           | 1 |
| GO:0004745 | 1   | 1   | 100   | 1.13 | 0 | 0     | 0    | 0  | 0     | 0    | 0 | 0    | 0    | 1 | 1 | 1           | 1 |
| GO:0004748 | 8   | 8   | 100   | 1.13 | 0 | 0     | 0    | 0  | 0     | 0    | 0 | 0    | 0    | 1 | 1 | 1           | 1 |
| GO:0004749 | 7   | 7   | 100   | 1.13 | 0 | 0     | 0    | 0  | 0     | 0    | 0 | 0    | 0    | 1 | 1 | 1           | 1 |
| GO:0004750 | 2   | 2   | 100   | 1.13 | 0 | 0     | 0    | 0  | 0     | 0    | 0 | 0    | 0    | 1 | 1 | 1           | 1 |
| GO:0004752 | 4   | 4   | 100   | 1.13 | 0 | 0     | 0    | 0  | 0     | 0    | 0 | 0    | 0    | 1 | 1 | 1           | 1 |
| GO:0004756 | 4   | 4   | 100   | 1.13 | 0 | 0     | 0    | 0  | 0     | 0    | 0 | 0    | 0    | 1 | 1 | 1           | 1 |
| GO:0004757 | 1   | 1   | 100   | 1.13 | 0 | 0     | 0    | 0  | 0     | 0    | 0 | 0    | 0    | 1 | 1 | 1           | 1 |

|            |     |     |       |      |   |       |       |   |      |       |   |       |       |   |   |   |   |
|------------|-----|-----|-------|------|---|-------|-------|---|------|-------|---|-------|-------|---|---|---|---|
| GO:0004758 | 8   | 8   | 100   | 1.13 | 0 | 0     | 0     | 0 | 0    | 0     | 0 | 0     | 0     | 1 | 1 | 1 | 1 |
| GO:0004759 | 21  | 14  | 66.67 | 0.75 | 1 | 4.76  | 1.36  | 2 | 9.52 | 2.05  | 4 | 19.05 | 5.38  | 1 | 1 | 1 | 1 |
| GO:0004765 | 1   | 1   | 100   | 1.13 | 0 | 0     | 0     | 0 | 0    | 0     | 0 | 0     | 0     | 1 | 1 | 1 | 1 |
| GO:0004766 | 5   | 5   | 100   | 1.13 | 0 | 0     | 0     | 0 | 0    | 0     | 0 | 0     | 0     | 1 | 1 | 1 | 1 |
| GO:0004767 | 6   | 6   | 100   | 1.13 | 0 | 0     | 0     | 0 | 0    | 0     | 0 | 0     | 0     | 1 | 1 | 1 | 1 |
| GO:0004768 | 5   | 5   | 100   | 1.13 | 0 | 0     | 0     | 0 | 0    | 0     | 0 | 0     | 0     | 1 | 1 | 1 | 1 |
| GO:0004769 | 4   | 3   | 75    | 0.85 | 0 | 0     | 0     | 0 | 0    | 0     | 1 | 25    | 7.06  | 1 | 1 | 1 | 1 |
| GO:0004771 | 1   | 1   | 100   | 1.13 | 0 | 0     | 0     | 0 | 0    | 0     | 0 | 0     | 0     | 1 | 1 | 1 | 1 |
| GO:0004772 | 3   | 3   | 100   | 1.13 | 0 | 0     | 0     | 0 | 0    | 0     | 0 | 0     | 0     | 1 | 1 | 1 | 1 |
| GO:0004774 | 5   | 5   | 100   | 1.13 | 0 | 0     | 0     | 0 | 0    | 0     | 0 | 0     | 0     | 1 | 1 | 1 | 1 |
| GO:0004776 | 2   | 2   | 100   | 1.13 | 0 | 0     | 0     | 0 | 0    | 0     | 0 | 0     | 0     | 1 | 1 | 1 | 1 |
| GO:0004777 | 2   | 2   | 100   | 1.13 | 0 | 0     | 0     | 0 | 0    | 0     | 0 | 0     | 0     | 1 | 1 | 1 | 1 |
| GO:0004779 | 1   | 1   | 100   | 1.13 | 0 | 0     | 0     | 0 | 0    | 0     | 0 | 0     | 0     | 1 | 1 | 1 | 1 |
| GO:0004781 | 4   | 4   | 100   | 1.13 | 0 | 0     | 0     | 0 | 0    | 0     | 0 | 0     | 0     | 1 | 1 | 1 | 1 |
| GO:0004782 | 1   | 0   | 0     | 0    | 1 | 100   | 28.63 | 0 | 0    | 0     | 0 | 0     | 0     | 1 | 1 | 1 | 1 |
| GO:0004784 | 1   | 1   | 100   | 1.13 | 0 | 0     | 0     | 0 | 0    | 0     | 0 | 0     | 0     | 1 | 1 | 1 | 1 |
| GO:0004785 | 8   | 8   | 100   | 1.13 | 0 | 0     | 0     | 0 | 0    | 0     | 0 | 0     | 0     | 1 | 1 | 1 | 1 |
| GO:0004787 | 1   | 1   | 100   | 1.13 | 0 | 0     | 0     | 0 | 0    | 0     | 0 | 0     | 0     | 1 | 1 | 1 | 1 |
| GO:0004788 | 4   | 4   | 100   | 1.13 | 0 | 0     | 0     | 0 | 0    | 0     | 0 | 0     | 0     | 1 | 1 | 1 | 1 |
| GO:0004790 | 2   | 0   | 0     | 0    | 0 | 0     | 0     | 1 | 50   | 10.76 | 1 | 50    | 14.11 | 1 | 1 | 1 | 1 |
| GO:0004791 | 8   | 8   | 100   | 1.13 | 0 | 0     | 0     | 0 | 0    | 0     | 0 | 0     | 0     | 1 | 1 | 1 | 1 |
| GO:0004792 | 3   | 3   | 100   | 1.13 | 0 | 0     | 0     | 0 | 0    | 0     | 0 | 0     | 0     | 1 | 1 | 1 | 1 |
| GO:0004795 | 1   | 1   | 100   | 1.13 | 0 | 0     | 0     | 0 | 0    | 0     | 0 | 0     | 0     | 1 | 1 | 1 | 1 |
| GO:0004796 | 1   | 0   | 0     | 0    | 0 | 0     | 0     | 0 | 0    | 0     | 1 | 100   | 28.22 | 1 | 1 | 1 | 1 |
| GO:0004797 | 3   | 2   | 66.67 | 0.75 | 1 | 33.33 | 9.54  | 0 | 0    | 0     | 0 | 0     | 0     | 1 | 1 | 1 | 1 |
| GO:0004798 | 10  | 10  | 100   | 1.13 | 0 | 0     | 0     | 0 | 0    | 0     | 0 | 0     | 0     | 1 | 1 | 1 | 1 |
| GO:0004799 | 2   | 2   | 100   | 1.13 | 0 | 0     | 0     | 0 | 0    | 0     | 0 | 0     | 0     | 1 | 1 | 1 | 1 |
| GO:0004800 | 2   | 2   | 100   | 1.13 | 0 | 0     | 0     | 0 | 0    | 0     | 0 | 0     | 0     | 1 | 1 | 1 | 1 |
| GO:0004801 | 2   | 2   | 100   | 1.13 | 0 | 0     | 0     | 0 | 0    | 0     | 0 | 0     | 0     | 1 | 1 | 1 | 1 |
| GO:0004802 | 13  | 13  | 100   | 1.13 | 0 | 0     | 0     | 0 | 0    | 0     | 0 | 0     | 0     | 1 | 1 | 1 | 1 |
| GO:0004806 | 4   | 3   | 75    | 0.85 | 0 | 0     | 0     | 1 | 25   | 5.38  | 0 | 0     | 0     | 1 | 1 | 1 | 1 |
| GO:0004807 | 3   | 3   | 100   | 1.13 | 0 | 0     | 0     | 0 | 0    | 0     | 0 | 0     | 0     | 1 | 1 | 1 | 1 |
| GO:0004808 | 1   | 1   | 100   | 1.13 | 0 | 0     | 0     | 0 | 0    | 0     | 0 | 0     | 0     | 1 | 1 | 1 | 1 |
| GO:0004809 | 1   | 1   | 100   | 1.13 | 0 | 0     | 0     | 0 | 0    | 0     | 0 | 0     | 0     | 1 | 1 | 1 | 1 |
| GO:0004810 | 1   | 1   | 100   | 1.13 | 0 | 0     | 0     | 0 | 0    | 0     | 0 | 0     | 0     | 1 | 1 | 1 | 1 |
| GO:0004811 | 1   | 1   | 100   | 1.13 | 0 | 0     | 0     | 0 | 0    | 0     | 0 | 0     | 0     | 1 | 1 | 1 | 1 |
| GO:0004812 | 135 | 121 | 89.63 | 1.01 | 6 | 4.44  | 1.27  | 6 | 4.44 | 0.96  | 2 | 1.48  | 0.42  | 1 | 1 | 1 | 1 |
| GO:0004813 | 5   | 5   | 100   | 1.13 | 0 | 0     | 0     | 0 | 0    | 0     | 0 | 0     | 0     | 1 | 1 | 1 | 1 |
| GO:0004814 | 5   | 5   | 100   | 1.13 | 0 | 0     | 0     | 0 | 0    | 0     | 0 | 0     | 0     | 1 | 1 | 1 | 1 |
| GO:0004815 | 9   | 6   | 66.67 | 0.75 | 3 | 33.33 | 9.54  | 0 | 0    | 0     | 0 | 0     | 0     | 1 | 1 | 1 | 1 |
| GO:0004816 | 4   | 4   | 100   | 1.13 | 0 | 0     | 0     | 0 | 0    | 0     | 0 | 0     | 0     | 1 | 1 | 1 | 1 |

|            |     |     |       |      |   |       |       |   |       |       |    |       |       |   |             |   |             |
|------------|-----|-----|-------|------|---|-------|-------|---|-------|-------|----|-------|-------|---|-------------|---|-------------|
| GO:0004817 | 3   | 3   | 100   | 1.13 | 0 | 0     | 0     | 0 | 0     | 0     | 0  | 0     | 0     | 1 | 1           | 1 | 1           |
| GO:0004818 | 9   | 9   | 100   | 1.13 | 0 | 0     | 0     | 0 | 0     | 0     | 0  | 0     | 0     | 1 | 1           | 1 | 1           |
| GO:0004819 | 3   | 3   | 100   | 1.13 | 0 | 0     | 0     | 0 | 0     | 0     | 0  | 0     | 0     | 1 | 1           | 1 | 1           |
| GO:0004820 | 2   | 2   | 100   | 1.13 | 0 | 0     | 0     | 0 | 0     | 0     | 0  | 0     | 0     | 1 | 1           | 1 | 1           |
| GO:0004821 | 8   | 8   | 100   | 1.13 | 0 | 0     | 0     | 0 | 0     | 0     | 0  | 0     | 0     | 1 | 1           | 1 | 1           |
| GO:0004822 | 7   | 7   | 100   | 1.13 | 0 | 0     | 0     | 0 | 0     | 0     | 0  | 0     | 0     | 1 | 1           | 1 | 1           |
| GO:0004823 | 2   | 2   | 100   | 1.13 | 0 | 0     | 0     | 0 | 0     | 0     | 0  | 0     | 0     | 1 | 1           | 1 | 1           |
| GO:0004824 | 4   | 1   | 25    | 0.28 | 3 | 75    | 21.47 | 0 | 0     | 0     | 0  | 0     | 0     | 1 | 0.683729195 | 1 | 1           |
| GO:0004825 | 2   | 2   | 100   | 1.13 | 0 | 0     | 0     | 0 | 0     | 0     | 0  | 0     | 0     | 1 | 1           | 1 | 1           |
| GO:0004826 | 9   | 9   | 100   | 1.13 | 0 | 0     | 0     | 0 | 0     | 0     | 0  | 0     | 0     | 1 | 1           | 1 | 1           |
| GO:0004827 | 2   | 2   | 100   | 1.13 | 0 | 0     | 0     | 0 | 0     | 0     | 0  | 0     | 0     | 1 | 1           | 1 | 1           |
| GO:0004828 | 6   | 5   | 83.33 | 0.94 | 0 | 0     | 0     | 1 | 16.67 | 3.59  | 0  | 0     | 0     | 1 | 1           | 1 | 1           |
| GO:0004829 | 13  | 12  | 92.31 | 1.05 | 0 | 0     | 0     | 1 | 7.69  | 1.66  | 0  | 0     | 0     | 1 | 1           | 1 | 1           |
| GO:0004830 | 4   | 4   | 100   | 1.13 | 0 | 0     | 0     | 0 | 0     | 0     | 0  | 0     | 0     | 1 | 1           | 1 | 1           |
| GO:0004831 | 5   | 5   | 100   | 1.13 | 0 | 0     | 0     | 0 | 0     | 0     | 0  | 0     | 0     | 1 | 1           | 1 | 1           |
| GO:0004832 | 2   | 2   | 100   | 1.13 | 0 | 0     | 0     | 0 | 0     | 0     | 0  | 0     | 0     | 1 | 1           | 1 | 1           |
| GO:0004833 | 1   | 0   | 0     | 0    | 0 | 0     | 0     | 0 | 0     | 0     | 1  | 100   | 28.22 | 1 | 1           | 1 | 1           |
| GO:0004835 | 10  | 9   | 90    | 1.02 | 0 | 0     | 0     | 1 | 10    | 2.15  | 0  | 0     | 0     | 1 | 1           | 1 | 1           |
| GO:0004838 | 1   | 1   | 100   | 1.13 | 0 | 0     | 0     | 0 | 0     | 0     | 0  | 0     | 0     | 1 | 1           | 1 | 1           |
| GO:0004839 | 14  | 11  | 78.57 | 0.89 | 0 | 0     | 0     | 3 | 21.43 | 4.61  | 0  | 0     | 0     | 1 | 1           | 1 | 1           |
| GO:0004840 | 104 | 101 | 97.12 | 1.1  | 1 | 0.96  | 0.28  | 2 | 1.92  | 0.41  | 0  | 0     | 0     | 1 | 1           | 1 | 1           |
| GO:0004842 | 108 | 100 | 92.59 | 1.05 | 1 | 0.93  | 0.27  | 6 | 5.56  | 1.2   | 1  | 0.93  | 0.26  | 1 | 1           | 1 | 1           |
| GO:0004843 | 25  | 24  | 96    | 1.09 | 1 | 4     | 1.15  | 0 | 0     | 0     | 0  | 0     | 0     | 1 | 1           | 1 | 1           |
| GO:0004844 | 3   | 1   | 33.33 | 0.38 | 0 | 0     | 0     | 2 | 66.67 | 14.35 | 0  | 0     | 0     | 1 | 1           | 1 | 1           |
| GO:0004846 | 1   | 0   | 0     | 0    | 0 | 0     | 0     | 0 | 0     | 0     | 1  | 100   | 28.22 | 1 | 1           | 1 | 1           |
| GO:0004849 | 9   | 9   | 100   | 1.13 | 0 | 0     | 0     | 0 | 0     | 0     | 0  | 0     | 0     | 1 | 1           | 1 | 1           |
| GO:0004850 | 1   | 1   | 100   | 1.13 | 0 | 0     | 0     | 0 | 0     | 0     | 0  | 0     | 0     | 1 | 1           | 1 | 1           |
| GO:0004852 | 1   | 1   | 100   | 1.13 | 0 | 0     | 0     | 0 | 0     | 0     | 0  | 0     | 0     | 1 | 1           | 1 | 1           |
| GO:0004853 | 1   | 1   | 100   | 1.13 | 0 | 0     | 0     | 0 | 0     | 0     | 0  | 0     | 0     | 1 | 1           | 1 | 1           |
| GO:0004854 | 3   | 0   | 0     | 0    | 0 | 0     | 0     | 1 | 33.33 | 7.18  | 2  | 66.67 | 18.82 | 1 | 1           | 1 | 1           |
| GO:0004855 | 3   | 0   | 0     | 0    | 0 | 0     | 0     | 1 | 33.33 | 7.18  | 2  | 66.67 | 18.82 | 1 | 1           | 1 | 1           |
| GO:0004857 | 11  | 9   | 81.82 | 0.93 | 0 | 0     | 0     | 0 | 0     | 0     | 2  | 18.18 | 5.13  | 1 | 1           | 1 | 1           |
| GO:0004859 | 5   | 4   | 80    | 0.91 | 0 | 0     | 0     | 0 | 0     | 0     | 1  | 20    | 5.64  | 1 | 1           | 1 | 1           |
| GO:0004860 | 13  | 11  | 84.62 | 0.96 | 0 | 0     | 0     | 0 | 0     | 0     | 2  | 15.38 | 4.34  | 1 | 1           | 1 | 1           |
| GO:0004861 | 9   | 7   | 77.78 | 0.88 | 1 | 11.11 | 3.18  | 1 | 11.11 | 2.39  | 0  | 0     | 0     | 1 | 1           | 1 | 1           |
| GO:0004862 | 4   | 4   | 100   | 1.13 | 0 | 0     | 0     | 0 | 0     | 0     | 0  | 0     | 0     | 1 | 1           | 1 | 1           |
| GO:0004864 | 7   | 6   | 85.71 | 0.97 | 0 | 0     | 0     | 1 | 14.29 | 3.08  | 0  | 0     | 0     | 1 | 1           | 1 | 1           |
| GO:0004865 | 1   | 1   | 100   | 1.13 | 0 | 0     | 0     | 0 | 0     | 0     | 0  | 0     | 0     | 1 | 1           | 1 | 1           |
| GO:0004866 | 29  | 21  | 72.41 | 0.82 | 2 | 6.9   | 1.97  | 2 | 6.9   | 1.48  | 4  | 13.79 | 3.89  | 1 | 1           | 1 | 1           |
| GO:0004867 | 78  | 54  | 69.23 | 0.78 | 5 | 6.41  | 1.84  | 7 | 8.97  | 1.93  | 12 | 15.38 | 4.34  | 1 | 1           | 1 | 0.169399239 |
| GO:0004868 | 27  | 14  | 51.85 | 0.59 | 1 | 3.7   | 1.06  | 4 | 14.81 | 3.19  | 8  | 29.63 | 8.36  | 1 | 1           | 1 | 0.021368858 |

|            |     |     |       |      |    |       |       |    |       |       |    |       |       |   |   |   |             |
|------------|-----|-----|-------|------|----|-------|-------|----|-------|-------|----|-------|-------|---|---|---|-------------|
| GO:0004869 | 22  | 16  | 72.73 | 0.82 | 0  | 0     | 0     | 4  | 18.18 | 3.91  | 2  | 9.09  | 2.57  | 1 | 1 | 1 | 1           |
| GO:0004870 | 2   | 2   | 100   | 1.13 | 0  | 0     | 0     | 0  | 0     | 0     | 0  | 0     | 0     | 1 | 1 | 1 | 1           |
| GO:0004871 | 220 | 204 | 92.73 | 1.05 | 8  | 3.64  | 1.04  | 5  | 2.27  | 0.49  | 3  | 1.36  | 0.38  | 1 | 1 | 1 | 1           |
| GO:0004872 | 604 | 488 | 80.79 | 0.91 | 25 | 4.14  | 1.19  | 48 | 7.95  | 1.71  | 43 | 7.12  | 2.01  | 1 | 1 | 1 | 0.463264602 |
| GO:0004873 | 1   | 1   | 100   | 1.13 | 0  | 0     | 0     | 0  | 0     | 0     | 0  | 0     | 0     | 1 | 1 | 1 | 1           |
| GO:0004875 | 1   | 1   | 100   | 1.13 | 0  | 0     | 0     | 0  | 0     | 0     | 0  | 0     | 0     | 1 | 1 | 1 | 1           |
| GO:0004879 | 30  | 25  | 83.33 | 0.94 | 1  | 3.33  | 0.95  | 2  | 6.67  | 1.44  | 2  | 6.67  | 1.88  | 1 | 1 | 1 | 1           |
| GO:0004882 | 1   | 1   | 100   | 1.13 | 0  | 0     | 0     | 0  | 0     | 0     | 0  | 0     | 0     | 1 | 1 | 1 | 1           |
| GO:0004883 | 1   | 1   | 100   | 1.13 | 0  | 0     | 0     | 0  | 0     | 0     | 0  | 0     | 0     | 1 | 1 | 1 | 1           |
| GO:0004884 | 1   | 1   | 100   | 1.13 | 0  | 0     | 0     | 0  | 0     | 0     | 0  | 0     | 0     | 1 | 1 | 1 | 1           |
| GO:0004887 | 3   | 3   | 100   | 1.13 | 0  | 0     | 0     | 0  | 0     | 0     | 0  | 0     | 0     | 1 | 1 | 1 | 1           |
| GO:0004888 | 72  | 54  | 75    | 0.85 | 6  | 8.33  | 2.39  | 6  | 8.33  | 1.79  | 6  | 8.33  | 2.35  | 1 | 1 | 1 | 1           |
| GO:0004889 | 4   | 4   | 100   | 1.13 | 0  | 0     | 0     | 0  | 0     | 0     | 0  | 0     | 0     | 1 | 1 | 1 | 1           |
| GO:0004890 | 9   | 6   | 66.67 | 0.75 | 1  | 11.11 | 3.18  | 0  | 0     | 0     | 2  | 22.22 | 6.27  | 1 | 1 | 1 | 1           |
| GO:0004894 | 2   | 2   | 100   | 1.13 | 0  | 0     | 0     | 0  | 0     | 0     | 0  | 0     | 0     | 1 | 1 | 1 | 1           |
| GO:0004895 | 15  | 12  | 80    | 0.91 | 1  | 6.67  | 1.91  | 0  | 0     | 0     | 2  | 13.33 | 3.76  | 1 | 1 | 1 | 1           |
| GO:0004896 | 53  | 45  | 84.91 | 0.96 | 3  | 5.66  | 1.62  | 3  | 5.66  | 1.22  | 2  | 3.77  | 1.07  | 1 | 1 | 1 | 1           |
| GO:0004905 | 6   | 6   | 100   | 1.13 | 0  | 0     | 0     | 0  | 0     | 0     | 0  | 0     | 0     | 1 | 1 | 1 | 1           |
| GO:0004906 | 1   | 1   | 100   | 1.13 | 0  | 0     | 0     | 0  | 0     | 0     | 0  | 0     | 0     | 1 | 1 | 1 | 1           |
| GO:0004907 | 25  | 19  | 76    | 0.86 | 3  | 12    | 3.44  | 0  | 0     | 0     | 3  | 12    | 3.39  | 1 | 1 | 1 | 1           |
| GO:0004908 | 5   | 5   | 100   | 1.13 | 0  | 0     | 0     | 0  | 0     | 0     | 0  | 0     | 0     | 1 | 1 | 1 | 1           |
| GO:0004909 | 4   | 3   | 75    | 0.85 | 0  | 0     | 0     | 0  | 0     | 0     | 1  | 25    | 7.06  | 1 | 1 | 1 | 1           |
| GO:0004910 | 1   | 1   | 100   | 1.13 | 0  | 0     | 0     | 0  | 0     | 0     | 0  | 0     | 0     | 1 | 1 | 1 | 1           |
| GO:0004915 | 2   | 2   | 100   | 1.13 | 0  | 0     | 0     | 0  | 0     | 0     | 0  | 0     | 0     | 1 | 1 | 1 | 1           |
| GO:0004920 | 1   | 1   | 100   | 1.13 | 0  | 0     | 0     | 0  | 0     | 0     | 0  | 0     | 0     | 1 | 1 | 1 | 1           |
| GO:0004921 | 2   | 2   | 100   | 1.13 | 0  | 0     | 0     | 0  | 0     | 0     | 0  | 0     | 0     | 1 | 1 | 1 | 1           |
| GO:0004926 | 2   | 2   | 100   | 1.13 | 0  | 0     | 0     | 0  | 0     | 0     | 0  | 0     | 0     | 1 | 1 | 1 | 1           |
| GO:0004928 | 5   | 5   | 100   | 1.13 | 0  | 0     | 0     | 0  | 0     | 0     | 0  | 0     | 0     | 1 | 1 | 1 | 1           |
| GO:0004930 | 162 | 116 | 71.6  | 0.81 | 13 | 8.02  | 2.3   | 18 | 11.11 | 2.39  | 15 | 9.26  | 2.61  | 1 | 1 | 1 | 1           |
| GO:0004931 | 8   | 8   | 100   | 1.13 | 0  | 0     | 0     | 0  | 0     | 0     | 0  | 0     | 0     | 1 | 1 | 1 | 1           |
| GO:0004935 | 5   | 4   | 80    | 0.91 | 0  | 0     | 0     | 0  | 0     | 0     | 1  | 20    | 5.64  | 1 | 1 | 1 | 1           |
| GO:0004937 | 2   | 0   | 0     | 0    | 1  | 50    | 14.32 | 0  | 0     | 0     | 1  | 50    | 14.11 | 1 | 1 | 1 | 1           |
| GO:0004938 | 2   | 2   | 100   | 1.13 | 0  | 0     | 0     | 0  | 0     | 0     | 0  | 0     | 0     | 1 | 1 | 1 | 1           |
| GO:0004943 | 1   | 0   | 0     | 0    | 1  | 100   | 28.63 | 0  | 0     | 0     | 0  | 0     | 0     | 1 | 1 | 1 | 1           |
| GO:0004945 | 5   | 4   | 80    | 0.91 | 0  | 0     | 0     | 0  | 0     | 0     | 1  | 20    | 5.64  | 1 | 1 | 1 | 1           |
| GO:0004948 | 2   | 2   | 100   | 1.13 | 0  | 0     | 0     | 0  | 0     | 0     | 0  | 0     | 0     | 1 | 1 | 1 | 1           |
| GO:0004949 | 4   | 3   | 75    | 0.85 | 0  | 0     | 0     | 1  | 25    | 5.38  | 0  | 0     | 0     | 1 | 1 | 1 | 1           |
| GO:0004950 | 4   | 1   | 25    | 0.28 | 0  | 0     | 0     | 2  | 50    | 10.76 | 1  | 25    | 7.06  | 1 | 1 | 1 | 1           |
| GO:0004951 | 1   | 1   | 100   | 1.13 | 0  | 0     | 0     | 0  | 0     | 0     | 0  | 0     | 0     | 1 | 1 | 1 | 1           |
| GO:0004957 | 2   | 2   | 100   | 1.13 | 0  | 0     | 0     | 0  | 0     | 0     | 0  | 0     | 0     | 1 | 1 | 1 | 1           |
| GO:0004960 | 2   | 2   | 100   | 1.13 | 0  | 0     | 0     | 0  | 0     | 0     | 0  | 0     | 0     | 1 | 1 | 1 | 1           |



|            |    |    |       |      |   |      |       |   |       |     |   |       |       |   |   |   |
|------------|----|----|-------|------|---|------|-------|---|-------|-----|---|-------|-------|---|---|---|
| GO:0004962 | 3  | 3  | 100   | 1.13 | 0 | 0    | 0     | 0 | 0     | 0   | 0 | 0     | 1     | 1 | 1 | 1 |
| GO:0004964 | 1  | 1  | 100   | 1.13 | 0 | 0    | 0     | 0 | 0     | 0   | 0 | 0     | 1     | 1 | 1 | 1 |
| GO:0004967 | 1  | 1  | 100   | 1.13 | 0 | 0    | 0     | 0 | 0     | 0   | 0 | 0     | 1     | 1 | 1 | 1 |
| GO:0004970 | 10 | 9  | 90    | 1.02 | 1 | 10   | 2.86  | 0 | 0     | 0   | 0 | 0     | 1     | 1 | 1 | 1 |
| GO:0004971 | 3  | 3  | 100   | 1.13 | 0 | 0    | 0     | 0 | 0     | 0   | 0 | 0     | 1     | 1 | 1 | 1 |
| GO:0004972 | 1  | 1  | 100   | 1.13 | 0 | 0    | 0     | 0 | 0     | 0   | 0 | 0     | 1     | 1 | 1 | 1 |
| GO:0004974 | 2  | 0  | 0     | 0    | 2 | 100  | 28.63 | 0 | 0     | 0   | 0 | 0     | 1     | 1 | 1 | 1 |
| GO:0004977 | 2  | 2  | 100   | 1.13 | 0 | 0    | 0     | 0 | 0     | 0   | 0 | 0     | 1     | 1 | 1 | 1 |
| GO:0004982 | 1  | 0  | 0     | 0    | 1 | 100  | 28.63 | 0 | 0     | 0   | 0 | 0     | 1     | 1 | 1 | 1 |
| GO:0004983 | 2  | 1  | 50    | 0.57 | 1 | 50   | 14.32 | 0 | 0     | 0   | 0 | 0     | 1     | 1 | 1 | 1 |
| GO:0004984 | 1  | 0  | 0     | 0    | 0 | 0    | 0     | 0 | 0     | 0   | 1 | 100   | 28.22 | 1 | 1 | 1 |
| GO:0004985 | 3  | 3  | 100   | 1.13 | 0 | 0    | 0     | 0 | 0     | 0   | 0 | 0     | 1     | 1 | 1 | 1 |
| GO:0004990 | 1  | 1  | 100   | 1.13 | 0 | 0    | 0     | 0 | 0     | 0   | 0 | 0     | 1     | 1 | 1 | 1 |
| GO:0004993 | 1  | 1  | 100   | 1.13 | 0 | 0    | 0     | 0 | 0     | 0   | 0 | 0     | 1     | 1 | 1 | 1 |
| GO:0004994 | 1  | 1  | 100   | 1.13 | 0 | 0    | 0     | 0 | 0     | 0   | 0 | 0     | 1     | 1 | 1 | 1 |
| GO:0004995 | 1  | 1  | 100   | 1.13 | 0 | 0    | 0     | 0 | 0     | 0   | 0 | 0     | 1     | 1 | 1 | 1 |
| GO:0004996 | 1  | 1  | 100   | 1.13 | 0 | 0    | 0     | 0 | 0     | 0   | 0 | 0     | 1     | 1 | 1 | 1 |
| GO:0004998 | 3  | 3  | 100   | 1.13 | 0 | 0    | 0     | 0 | 0     | 0   | 0 | 0     | 1     | 1 | 1 | 1 |
| GO:0004999 | 2  | 2  | 100   | 1.13 | 0 | 0    | 0     | 0 | 0     | 0   | 0 | 0     | 1     | 1 | 1 | 1 |
| GO:0005000 | 2  | 2  | 100   | 1.13 | 0 | 0    | 0     | 0 | 0     | 0   | 0 | 0     | 1     | 1 | 1 | 1 |
| GO:0005001 | 1  | 0  | 0     | 0    | 1 | 100  | 28.63 | 0 | 0     | 0   | 0 | 0     | 1     | 1 | 1 | 1 |
| GO:0005003 | 13 | 13 | 100   | 1.13 | 0 | 0    | 0     | 0 | 0     | 0   | 0 | 0     | 1     | 1 | 1 | 1 |
| GO:0005005 | 4  | 4  | 100   | 1.13 | 0 | 0    | 0     | 0 | 0     | 0   | 0 | 0     | 1     | 1 | 1 | 1 |
| GO:0005006 | 4  | 4  | 100   | 1.13 | 0 | 0    | 0     | 0 | 0     | 0   | 0 | 0     | 1     | 1 | 1 | 1 |
| GO:0005007 | 4  | 4  | 100   | 1.13 | 0 | 0    | 0     | 0 | 0     | 0   | 0 | 0     | 1     | 1 | 1 | 1 |
| GO:0005021 | 4  | 4  | 100   | 1.13 | 0 | 0    | 0     | 0 | 0     | 0   | 0 | 0     | 1     | 1 | 1 | 1 |
| GO:0005024 | 10 | 10 | 100   | 1.13 | 0 | 0    | 0     | 0 | 0     | 0   | 0 | 0     | 1     | 1 | 1 | 1 |
| GO:0005027 | 1  | 1  | 100   | 1.13 | 0 | 0    | 0     | 0 | 0     | 0   | 0 | 0     | 1     | 1 | 1 | 1 |
| GO:0005031 | 4  | 3  | 75    | 0.85 | 0 | 0    | 0     | 0 | 0     | 0   | 1 | 25    | 7.06  | 1 | 1 | 1 |
| GO:0005034 | 2  | 2  | 100   | 1.13 | 0 | 0    | 0     | 0 | 0     | 0   | 0 | 0     | 1     | 1 | 1 | 1 |
| GO:0005035 | 1  | 1  | 100   | 1.13 | 0 | 0    | 0     | 0 | 0     | 0   | 0 | 0     | 1     | 1 | 1 | 1 |
| GO:0005037 | 2  | 2  | 100   | 1.13 | 0 | 0    | 0     | 0 | 0     | 0   | 0 | 0     | 1     | 1 | 1 | 1 |
| GO:0005041 | 12 | 11 | 91.67 | 1.04 | 0 | 0    | 0     | 0 | 0     | 0   | 1 | 8.33  | 2.35  | 1 | 1 | 1 |
| GO:0005042 | 2  | 2  | 100   | 1.13 | 0 | 0    | 0     | 0 | 0     | 0   | 0 | 0     | 1     | 1 | 1 | 1 |
| GO:0005044 | 34 | 22 | 64.71 | 0.73 | 2 | 5.88 | 1.68  | 6 | 17.65 | 3.8 | 4 | 11.76 | 3.32  | 1 | 1 | 1 |
| GO:0005045 | 4  | 4  | 100   | 1.13 | 0 | 0    | 0     | 0 | 0     | 0   | 0 | 0     | 1     | 1 | 1 | 1 |
| GO:0005046 | 3  | 3  | 100   | 1.13 | 0 | 0    | 0     | 0 | 0     | 0   | 0 | 0     | 1     | 1 | 1 | 1 |
| GO:0005047 | 3  | 3  | 100   | 1.13 | 0 | 0    | 0     | 0 | 0     | 0   | 0 | 0     | 1     | 1 | 1 | 1 |
| GO:0005048 | 4  | 3  | 75    | 0.85 | 1 | 25   | 7.16  | 0 | 0     | 0   | 0 | 0     | 1     | 1 | 1 | 1 |
| GO:0005049 | 1  | 1  | 100   | 1.13 | 0 | 0    | 0     | 0 | 0     | 0   | 0 | 0     | 1     | 1 | 1 | 1 |
| GO:0005051 | 2  | 2  | 100   | 1.13 | 0 | 0    | 0     | 0 | 0     | 0   | 0 | 0     | 1     | 1 | 1 | 1 |

|            |     |     |       |      |   |       |      |    |       |       |   |       |      |   |   |             |   |
|------------|-----|-----|-------|------|---|-------|------|----|-------|-------|---|-------|------|---|---|-------------|---|
| GO:0005055 | 4   | 4   | 100   | 1.13 | 0 | 0     | 0    | 0  | 0     | 0     | 0 | 0     | 0    | 1 | 1 | 1           | 1 |
| GO:0005057 | 30  | 26  | 86.67 | 0.98 | 1 | 3.33  | 0.95 | 3  | 10    | 2.15  | 0 | 0     | 0    | 1 | 1 | 1           | 1 |
| GO:0005061 | 1   | 1   | 100   | 1.13 | 0 | 0     | 0    | 0  | 0     | 0     | 0 | 0     | 0    | 1 | 1 | 1           | 1 |
| GO:0005062 | 2   | 2   | 100   | 1.13 | 0 | 0     | 0    | 0  | 0     | 0     | 0 | 0     | 0    | 1 | 1 | 1           | 1 |
| GO:0005065 | 7   | 6   | 85.71 | 0.97 | 1 | 14.29 | 4.09 | 0  | 0     | 0     | 0 | 0     | 0    | 1 | 1 | 1           | 1 |
| GO:0005066 | 10  | 8   | 80    | 0.91 | 0 | 0     | 0    | 2  | 20    | 4.31  | 0 | 0     | 0    | 1 | 1 | 1           | 1 |
| GO:0005068 | 10  | 10  | 100   | 1.13 | 0 | 0     | 0    | 0  | 0     | 0     | 0 | 0     | 0    | 1 | 1 | 1           | 1 |
| GO:0005069 | 3   | 2   | 66.67 | 0.75 | 0 | 0     | 0    | 1  | 33.33 | 7.18  | 0 | 0     | 0    | 1 | 1 | 1           | 1 |
| GO:0005070 | 32  | 28  | 87.5  | 0.99 | 1 | 3.13  | 0.89 | 2  | 6.25  | 1.35  | 1 | 3.13  | 0.88 | 1 | 1 | 1           | 1 |
| GO:0005074 | 1   | 1   | 100   | 1.13 | 0 | 0     | 0    | 0  | 0     | 0     | 0 | 0     | 0    | 1 | 1 | 1           | 1 |
| GO:0005075 | 5   | 5   | 100   | 1.13 | 0 | 0     | 0    | 0  | 0     | 0     | 0 | 0     | 0    | 1 | 1 | 1           | 1 |
| GO:0005076 | 1   | 1   | 100   | 1.13 | 0 | 0     | 0    | 0  | 0     | 0     | 0 | 0     | 0    | 1 | 1 | 1           | 1 |
| GO:0005078 | 2   | 2   | 100   | 1.13 | 0 | 0     | 0    | 0  | 0     | 0     | 0 | 0     | 0    | 1 | 1 | 1           | 1 |
| GO:0005079 | 3   | 3   | 100   | 1.13 | 0 | 0     | 0    | 0  | 0     | 0     | 0 | 0     | 0    | 1 | 1 | 1           | 1 |
| GO:0005080 | 16  | 15  | 93.75 | 1.06 | 0 | 0     | 0    | 1  | 6.25  | 1.35  | 0 | 0     | 0    | 1 | 1 | 1           | 1 |
| GO:0005083 | 45  | 40  | 88.89 | 1.01 | 3 | 6.67  | 1.91 | 2  | 4.44  | 0.96  | 0 | 0     | 0    | 1 | 1 | 1           | 1 |
| GO:0005085 | 69  | 62  | 89.86 | 1.02 | 3 | 4.35  | 1.24 | 2  | 2.9   | 0.62  | 2 | 2.9   | 0.82 | 1 | 1 | 1           | 1 |
| GO:0005086 | 8   | 3   | 37.5  | 0.42 | 0 | 0     | 0    | 5  | 62.5  | 13.45 | 0 | 0     | 0    | 1 | 1 | 0.052329147 | 1 |
| GO:0005087 | 6   | 5   | 83.33 | 0.94 | 1 | 16.67 | 4.77 | 0  | 0     | 0     | 0 | 0     | 0    | 1 | 1 | 1           | 1 |
| GO:0005089 | 5   | 4   | 80    | 0.91 | 0 | 0     | 0    | 0  | 0     | 0     | 1 | 20    | 5.64 | 1 | 1 | 1           | 1 |
| GO:0005093 | 3   | 3   | 100   | 1.13 | 0 | 0     | 0    | 0  | 0     | 0     | 0 | 0     | 0    | 1 | 1 | 1           | 1 |
| GO:0005094 | 9   | 6   | 66.67 | 0.75 | 0 | 0     | 0    | 3  | 33.33 | 7.18  | 0 | 0     | 0    | 1 | 1 | 1           | 1 |
| GO:0005095 | 7   | 6   | 85.71 | 0.97 | 0 | 0     | 0    | 0  | 0     | 0     | 1 | 14.29 | 4.03 | 1 | 1 | 1           | 1 |
| GO:0005096 | 135 | 119 | 88.15 | 1    | 6 | 4.44  | 1.27 | 6  | 4.44  | 0.96  | 4 | 2.96  | 0.84 | 1 | 1 | 1           | 1 |
| GO:0005097 | 11  | 10  | 90.91 | 1.03 | 0 | 0     | 0    | 0  | 0     | 0     | 1 | 9.09  | 2.57 | 1 | 1 | 1           | 1 |
| GO:0005098 | 1   | 1   | 100   | 1.13 | 0 | 0     | 0    | 0  | 0     | 0     | 0 | 0     | 0    | 1 | 1 | 1           | 1 |
| GO:0005099 | 11  | 10  | 90.91 | 1.03 | 0 | 0     | 0    | 0  | 0     | 0     | 1 | 9.09  | 2.57 | 1 | 1 | 1           | 1 |
| GO:0005100 | 16  | 16  | 100   | 1.13 | 0 | 0     | 0    | 0  | 0     | 0     | 0 | 0     | 0    | 1 | 1 | 1           | 1 |
| GO:0005102 | 44  | 38  | 86.36 | 0.98 | 1 | 2.27  | 0.65 | 2  | 4.55  | 0.98  | 3 | 6.82  | 1.92 | 1 | 1 | 1           | 1 |
| GO:0005104 | 1   | 1   | 100   | 1.13 | 0 | 0     | 0    | 0  | 0     | 0     | 0 | 0     | 0    | 1 | 1 | 1           | 1 |
| GO:0005106 | 2   | 2   | 100   | 1.13 | 0 | 0     | 0    | 0  | 0     | 0     | 0 | 0     | 0    | 1 | 1 | 1           | 1 |
| GO:0005112 | 1   | 1   | 100   | 1.13 | 0 | 0     | 0    | 0  | 0     | 0     | 0 | 0     | 0    | 1 | 1 | 1           | 1 |
| GO:0005113 | 1   | 1   | 100   | 1.13 | 0 | 0     | 0    | 0  | 0     | 0     | 0 | 0     | 0    | 1 | 1 | 1           | 1 |
| GO:0005123 | 3   | 3   | 100   | 1.13 | 0 | 0     | 0    | 0  | 0     | 0     | 0 | 0     | 0    | 1 | 1 | 1           | 1 |
| GO:0005125 | 123 | 86  | 69.92 | 0.79 | 2 | 1.63  | 0.47 | 27 | 21.95 | 4.73  | 8 | 6.5   | 1.84 | 1 | 1 | 1.98E-07    | 1 |
| GO:0005126 | 1   | 1   | 100   | 1.13 | 0 | 0     | 0    | 0  | 0     | 0     | 0 | 0     | 0    | 1 | 1 | 1           | 1 |
| GO:0005138 | 1   | 0   | 0     | 0    | 0 | 0     | 0    | 1  | 100   | 21.53 | 0 | 0     | 0    | 1 | 1 | 1           | 1 |
| GO:0005139 | 1   | 1   | 100   | 1.13 | 0 | 0     | 0    | 0  | 0     | 0     | 0 | 0     | 0    | 1 | 1 | 1           | 1 |
| GO:0005149 | 11  | 2   | 18.18 | 0.21 | 1 | 9.09  | 2.6  | 5  | 45.45 | 9.78  | 3 | 27.27 | 7.7  | 1 | 1 | 0.380704074 | 1 |
| GO:0005152 | 7   | 2   | 28.57 | 0.32 | 0 | 0     | 0    | 4  | 57.14 | 12.3  | 1 | 14.29 | 4.03 | 1 | 1 | 0.663800322 | 1 |
| GO:0005153 | 2   | 2   | 100   | 1.13 | 0 | 0     | 0    | 0  | 0     | 0     | 0 | 0     | 0    | 1 | 1 | 1           | 1 |

|            |     |     |       |      |    |       |       |    |       |      |    |       |       |   |   |   |
|------------|-----|-----|-------|------|----|-------|-------|----|-------|------|----|-------|-------|---|---|---|
| GO:0005154 | 1   | 1   | 100   | 1.13 | 0  | 0     | 0     | 0  | 0     | 0    | 0  | 0     | 1     | 1 | 1 | 1 |
| GO:0005158 | 5   | 4   | 80    | 0.91 | 0  | 0     | 0     | 1  | 20    | 4.31 | 0  | 0     | 1     | 1 | 1 | 1 |
| GO:0005160 | 3   | 2   | 66.67 | 0.75 | 1  | 33.33 | 9.54  | 0  | 0     | 0    | 0  | 0     | 1     | 1 | 1 | 1 |
| GO:0005161 | 2   | 1   | 50    | 0.57 | 1  | 50    | 14.32 | 0  | 0     | 0    | 0  | 0     | 1     | 1 | 1 | 1 |
| GO:0005162 | 6   | 4   | 66.67 | 0.75 | 0  | 0     | 0     | 0  | 0     | 0    | 2  | 33.33 | 9.41  | 1 | 1 | 1 |
| GO:0005164 | 15  | 11  | 73.33 | 0.83 | 1  | 6.67  | 1.91  | 3  | 20    | 4.31 | 0  | 0     | 1     | 1 | 1 | 1 |
| GO:0005172 | 7   | 3   | 42.86 | 0.49 | 1  | 14.29 | 4.09  | 3  | 42.86 | 9.23 | 0  | 0     | 1     | 1 | 1 | 1 |
| GO:0005173 | 5   | 5   | 100   | 1.13 | 0  | 0     | 0     | 0  | 0     | 0    | 0  | 0     | 1     | 1 | 1 | 1 |
| GO:0005177 | 1   | 1   | 100   | 1.13 | 0  | 0     | 0     | 0  | 0     | 0    | 0  | 0     | 1     | 1 | 1 | 1 |
| GO:0005178 | 18  | 11  | 61.11 | 0.69 | 0  | 0     | 0     | 5  | 27.78 | 5.98 | 2  | 11.11 | 3.14  | 1 | 1 | 1 |
| GO:0005179 | 35  | 26  | 74.29 | 0.84 | 0  | 0     | 0     | 4  | 11.43 | 2.46 | 5  | 14.29 | 4.03  | 1 | 1 | 1 |
| GO:0005180 | 12  | 11  | 91.67 | 1.04 | 0  | 0     | 0     | 1  | 8.33  | 1.79 | 0  | 0     | 0     | 1 | 1 | 1 |
| GO:0005181 | 2   | 1   | 50    | 0.57 | 0  | 0     | 0     | 0  | 0     | 0    | 1  | 50    | 14.11 | 1 | 1 | 1 |
| GO:0005184 | 5   | 4   | 80    | 0.91 | 0  | 0     | 0     | 0  | 0     | 0    | 1  | 20    | 5.64  | 1 | 1 | 1 |
| GO:0005187 | 4   | 3   | 75    | 0.85 | 1  | 25    | 7.16  | 0  | 0     | 0    | 0  | 0     | 0     | 1 | 1 | 1 |
| GO:0005189 | 5   | 3   | 60    | 0.68 | 0  | 0     | 0     | 0  | 0     | 0    | 2  | 40    | 11.29 | 1 | 1 | 1 |
| GO:0005192 | 1   | 1   | 100   | 1.13 | 0  | 0     | 0     | 0  | 0     | 0    | 0  | 0     | 0     | 1 | 1 | 1 |
| GO:0005194 | 50  | 46  | 92    | 1.04 | 0  | 0     | 0     | 3  | 6     | 1.29 | 1  | 2     | 0.56  | 1 | 1 | 1 |
| GO:0005198 | 206 | 179 | 86.89 | 0.98 | 8  | 3.88  | 1.11  | 12 | 5.83  | 1.25 | 7  | 3.4   | 0.96  | 1 | 1 | 1 |
| GO:0005200 | 146 | 131 | 89.73 | 1.02 | 5  | 3.42  | 0.98  | 7  | 4.79  | 1.03 | 3  | 2.05  | 0.58  | 1 | 1 | 1 |
| GO:0005201 | 53  | 45  | 84.91 | 0.96 | 4  | 7.55  | 2.16  | 3  | 5.66  | 1.22 | 1  | 1.89  | 0.53  | 1 | 1 | 1 |
| GO:0005202 | 17  | 13  | 76.47 | 0.87 | 3  | 17.65 | 5.05  | 1  | 5.88  | 1.27 | 0  | 0     | 0     | 1 | 1 | 1 |
| GO:0005203 | 12  | 8   | 66.67 | 0.75 | 2  | 16.67 | 4.77  | 0  | 0     | 0    | 2  | 16.67 | 4.7   | 1 | 1 | 1 |
| GO:0005204 | 2   | 2   | 100   | 1.13 | 0  | 0     | 0     | 0  | 0     | 0    | 0  | 0     | 0     | 1 | 1 | 1 |
| GO:0005206 | 2   | 2   | 100   | 1.13 | 0  | 0     | 0     | 0  | 0     | 0    | 0  | 0     | 0     | 1 | 1 | 1 |
| GO:0005207 | 17  | 12  | 70.59 | 0.8  | 3  | 17.65 | 5.05  | 1  | 5.88  | 1.27 | 1  | 5.88  | 1.66  | 1 | 1 | 1 |
| GO:0005208 | 11  | 10  | 90.91 | 1.03 | 1  | 9.09  | 2.6   | 0  | 0     | 0    | 0  | 0     | 0     | 1 | 1 | 1 |
| GO:0005209 | 13  | 4   | 30.77 | 0.35 | 3  | 23.08 | 6.61  | 4  | 30.77 | 6.62 | 2  | 15.38 | 4.34  | 1 | 1 | 1 |
| GO:0005211 | 8   | 4   | 50    | 0.57 | 0  | 0     | 0     | 0  | 0     | 0    | 4  | 50    | 14.11 | 1 | 1 | 1 |
| GO:0005212 | 13  | 12  | 92.31 | 1.05 | 0  | 0     | 0     | 0  | 0     | 0    | 1  | 7.69  | 2.17  | 1 | 1 | 1 |
| GO:0005215 | 357 | 318 | 89.08 | 1.01 | 13 | 3.64  | 1.04  | 15 | 4.2   | 0.9  | 11 | 3.08  | 0.87  | 1 | 1 | 1 |
| GO:0005216 | 127 | 107 | 84.25 | 0.95 | 9  | 7.09  | 2.03  | 2  | 1.57  | 0.34 | 9  | 7.09  | 2     | 1 | 1 | 1 |
| GO:0005220 | 2   | 2   | 100   | 1.13 | 0  | 0     | 0     | 0  | 0     | 0    | 0  | 0     | 0     | 1 | 1 | 1 |
| GO:0005224 | 5   | 5   | 100   | 1.13 | 0  | 0     | 0     | 0  | 0     | 0    | 0  | 0     | 0     | 1 | 1 | 1 |
| GO:0005229 | 1   | 1   | 100   | 1.13 | 0  | 0     | 0     | 0  | 0     | 0    | 0  | 0     | 0     | 1 | 1 | 1 |
| GO:0005230 | 14  | 11  | 78.57 | 0.89 | 1  | 7.14  | 2.05  | 0  | 0     | 0    | 2  | 14.29 | 4.03  | 1 | 1 | 1 |
| GO:0005234 | 9   | 8   | 88.89 | 1.01 | 1  | 11.11 | 3.18  | 0  | 0     | 0    | 0  | 0     | 0     | 1 | 1 | 1 |
| GO:0005242 | 8   | 6   | 75    | 0.85 | 2  | 25    | 7.16  | 0  | 0     | 0    | 0  | 0     | 0     | 1 | 1 | 1 |
| GO:0005243 | 9   | 6   | 66.67 | 0.75 | 1  | 11.11 | 3.18  | 0  | 0     | 0    | 2  | 22.22 | 6.27  | 1 | 1 | 1 |
| GO:0005244 | 55  | 43  | 78.18 | 0.89 | 6  | 10.91 | 3.12  | 2  | 3.64  | 0.78 | 4  | 7.27  | 2.05  | 1 | 1 | 1 |
| GO:0005245 | 5   | 2   | 40    | 0.45 | 3  | 60    | 17.18 | 0  | 0     | 0    | 0  | 0     | 0     | 1 | 1 | 1 |

0.50470628

|            |    |    |       |      |   |       |       |   |       |       |   |       |       |   |          |   |   |
|------------|----|----|-------|------|---|-------|-------|---|-------|-------|---|-------|-------|---|----------|---|---|
| GO:0005247 | 21 | 17 | 80.95 | 0.92 | 3 | 14.29 | 4.09  | 1 | 4.76  | 1.03  | 0 | 0     | 0     | 1 | 1        | 1 | 1 |
| GO:0005248 | 1  | 1  | 100   | 1.13 | 0 | 0     | 0     | 0 | 0     | 0     | 0 | 0     | 0     | 1 | 1        | 1 | 1 |
| GO:0005249 | 61 | 57 | 93.44 | 1.06 | 1 | 1.64  | 0.47  | 2 | 3.28  | 0.71  | 1 | 1.64  | 0.46  | 1 | 1        | 1 | 1 |
| GO:0005251 | 1  | 1  | 100   | 1.13 | 0 | 0     | 0     | 0 | 0     | 0     | 0 | 0     | 0     | 1 | 1        | 1 | 1 |
| GO:0005254 | 4  | 4  | 100   | 1.13 | 0 | 0     | 0     | 0 | 0     | 0     | 0 | 0     | 0     | 1 | 1        | 1 | 1 |
| GO:0005261 | 32 | 31 | 96.88 | 1.1  | 0 | 0     | 0     | 0 | 0     | 0     | 1 | 3.13  | 0.88  | 1 | 1        | 1 | 1 |
| GO:0005262 | 22 | 19 | 86.36 | 0.98 | 2 | 9.09  | 2.6   | 0 | 0     | 0     | 1 | 4.55  | 1.28  | 1 | 1        | 1 | 1 |
| GO:0005267 | 40 | 37 | 92.5  | 1.05 | 2 | 5     | 1.43  | 0 | 0     | 0     | 1 | 2.5   | 0.71  | 1 | 1        | 1 | 1 |
| GO:0005272 | 2  | 2  | 100   | 1.13 | 0 | 0     | 0     | 0 | 0     | 0     | 0 | 0     | 0     | 1 | 1        | 1 | 1 |
| GO:0005279 | 43 | 40 | 93.02 | 1.05 | 0 | 0     | 0     | 2 | 4.65  | 1     | 1 | 2.33  | 0.66  | 1 | 1        | 1 | 1 |
| GO:0005280 | 1  | 1  | 100   | 1.13 | 0 | 0     | 0     | 0 | 0     | 0     | 0 | 0     | 0     | 1 | 1        | 1 | 1 |
| GO:0005286 | 3  | 3  | 100   | 1.13 | 0 | 0     | 0     | 0 | 0     | 0     | 0 | 0     | 0     | 1 | 1        | 1 | 1 |
| GO:0005311 | 7  | 6  | 85.71 | 0.97 | 0 | 0     | 0     | 1 | 14.29 | 3.08  | 0 | 0     | 0     | 1 | 1        | 1 | 1 |
| GO:0005313 | 1  | 0  | 0     | 0    | 0 | 0     | 0     | 1 | 100   | 21.53 | 0 | 0     | 0     | 1 | 1        | 1 | 1 |
| GO:0005315 | 1  | 1  | 100   | 1.13 | 0 | 0     | 0     | 0 | 0     | 0     | 0 | 0     | 0     | 1 | 1        | 1 | 1 |
| GO:0005319 | 31 | 25 | 80.65 | 0.91 | 0 | 0     | 0     | 3 | 9.68  | 2.08  | 3 | 9.68  | 2.73  | 1 | 1        | 1 | 1 |
| GO:0005320 | 4  | 2  | 50    | 0.57 | 0 | 0     | 0     | 2 | 50    | 10.76 | 0 | 0     | 0     | 1 | 1        | 1 | 1 |
| GO:0005328 | 11 | 9  | 81.82 | 0.93 | 2 | 18.18 | 5.21  | 0 | 0     | 0     | 0 | 0     | 0     | 1 | 1        | 1 | 1 |
| GO:0005329 | 1  | 1  | 100   | 1.13 | 0 | 0     | 0     | 0 | 0     | 0     | 0 | 0     | 0     | 1 | 1        | 1 | 1 |
| GO:0005330 | 1  | 1  | 100   | 1.13 | 0 | 0     | 0     | 0 | 0     | 0     | 0 | 0     | 0     | 1 | 1        | 1 | 1 |
| GO:0005331 | 5  | 5  | 100   | 1.13 | 0 | 0     | 0     | 0 | 0     | 0     | 0 | 0     | 0     | 1 | 1        | 1 | 1 |
| GO:0005332 | 6  | 5  | 83.33 | 0.94 | 1 | 16.67 | 4.77  | 0 | 0     | 0     | 0 | 0     | 0     | 1 | 1        | 1 | 1 |
| GO:0005337 | 9  | 9  | 100   | 1.13 | 0 | 0     | 0     | 0 | 0     | 0     | 0 | 0     | 0     | 1 | 1        | 1 | 1 |
| GO:0005338 | 5  | 5  | 100   | 1.13 | 0 | 0     | 0     | 0 | 0     | 0     | 0 | 0     | 0     | 1 | 1        | 1 | 1 |
| GO:0005344 | 14 | 5  | 35.71 | 0.4  | 8 | 57.14 | 16.36 | 0 | 0     | 0     | 1 | 7.14  | 2.02  | 1 | 2.86E-05 | 1 | 1 |
| GO:0005351 | 38 | 33 | 86.84 | 0.98 | 3 | 7.89  | 2.26  | 0 | 0     | 0     | 2 | 5.26  | 1.49  | 1 | 1        | 1 | 1 |
| GO:0005355 | 3  | 1  | 33.33 | 0.38 | 1 | 33.33 | 9.54  | 0 | 0     | 0     | 1 | 33.33 | 9.41  | 1 | 1        | 1 | 1 |
| GO:0005360 | 1  | 1  | 100   | 1.13 | 0 | 0     | 0     | 0 | 0     | 0     | 0 | 0     | 0     | 1 | 1        | 1 | 1 |
| GO:0005372 | 1  | 1  | 100   | 1.13 | 0 | 0     | 0     | 0 | 0     | 0     | 0 | 0     | 0     | 1 | 1        | 1 | 1 |
| GO:0005375 | 6  | 6  | 100   | 1.13 | 0 | 0     | 0     | 0 | 0     | 0     | 0 | 0     | 0     | 1 | 1        | 1 | 1 |
| GO:0005377 | 1  | 1  | 100   | 1.13 | 0 | 0     | 0     | 0 | 0     | 0     | 0 | 0     | 0     | 1 | 1        | 1 | 1 |
| GO:0005381 | 6  | 6  | 100   | 1.13 | 0 | 0     | 0     | 0 | 0     | 0     | 0 | 0     | 0     | 1 | 1        | 1 | 1 |
| GO:0005385 | 7  | 7  | 100   | 1.13 | 0 | 0     | 0     | 0 | 0     | 0     | 0 | 0     | 0     | 1 | 1        | 1 | 1 |
| GO:0005386 | 95 | 79 | 83.16 | 0.94 | 3 | 3.16  | 0.9   | 7 | 7.37  | 1.59  | 6 | 6.32  | 1.78  | 1 | 1        | 1 | 1 |
| GO:0005388 | 9  | 8  | 88.89 | 1.01 | 0 | 0     | 0     | 0 | 0     | 0     | 1 | 11.11 | 3.14  | 1 | 1        | 1 | 1 |
| GO:0005391 | 11 | 11 | 100   | 1.13 | 0 | 0     | 0     | 0 | 0     | 0     | 0 | 0     | 0     | 1 | 1        | 1 | 1 |
| GO:0005427 | 3  | 1  | 33.33 | 0.38 | 1 | 33.33 | 9.54  | 1 | 33.33 | 7.18  | 0 | 0     | 0     | 1 | 1        | 1 | 1 |
| GO:0005432 | 6  | 6  | 100   | 1.13 | 0 | 0     | 0     | 0 | 0     | 0     | 0 | 0     | 0     | 1 | 1        | 1 | 1 |
| GO:0005436 | 1  | 0  | 0     | 0    | 0 | 0     | 0     | 0 | 0     | 0     | 1 | 100   | 28.22 | 1 | 1        | 1 | 1 |
| GO:0005452 | 11 | 11 | 100   | 1.13 | 0 | 0     | 0     | 0 | 0     | 0     | 0 | 0     | 0     | 1 | 1        | 1 | 1 |
| GO:0005459 | 4  | 4  | 100   | 1.13 | 0 | 0     | 0     | 0 | 0     | 0     | 0 | 0     | 0     | 1 | 1        | 1 | 1 |

|            |      |      |       |      |    |       |       |    |       |       |    |       |      |             |   |   |             |
|------------|------|------|-------|------|----|-------|-------|----|-------|-------|----|-------|------|-------------|---|---|-------------|
| GO:0005468 | 3    | 3    | 100   | 1.13 | 0  | 0     | 0     | 0  | 0     | 0     | 0  | 0     | 0    | 1           | 1 | 1 | 1           |
| GO:0005471 | 7    | 7    | 100   | 1.13 | 0  | 0     | 0     | 0  | 0     | 0     | 0  | 0     | 0    | 1           | 1 | 1 | 1           |
| GO:0005478 | 14   | 14   | 100   | 1.13 | 0  | 0     | 0     | 0  | 0     | 0     | 0  | 0     | 0    | 1           | 1 | 1 | 1           |
| GO:0005480 | 18   | 18   | 100   | 1.13 | 0  | 0     | 0     | 0  | 0     | 0     | 0  | 0     | 0    | 1           | 1 | 1 | 1           |
| GO:0005482 | 9    | 9    | 100   | 1.13 | 0  | 0     | 0     | 0  | 0     | 0     | 0  | 0     | 0    | 1           | 1 | 1 | 1           |
| GO:0005484 | 1    | 1    | 100   | 1.13 | 0  | 0     | 0     | 0  | 0     | 0     | 0  | 0     | 0    | 1           | 1 | 1 | 1           |
| GO:0005486 | 4    | 4    | 100   | 1.13 | 0  | 0     | 0     | 0  | 0     | 0     | 0  | 0     | 0    | 1           | 1 | 1 | 1           |
| GO:0005487 | 16   | 16   | 100   | 1.13 | 0  | 0     | 0     | 0  | 0     | 0     | 0  | 0     | 0    | 1           | 1 | 1 | 1           |
| GO:0005488 | 135  | 124  | 91.85 | 1.04 | 2  | 1.48  | 0.42  | 5  | 3.7   | 0.8   | 4  | 2.96  | 0.84 | 1           | 1 | 1 | 1           |
| GO:0005489 | 428  | 399  | 93.22 | 1.06 | 9  | 2.1   | 0.6   | 11 | 2.57  | 0.55  | 9  | 2.1   | 0.59 | 0.24149745  | 1 | 1 | 1           |
| GO:0005496 | 26   | 23   | 88.46 | 1    | 1  | 3.85  | 1.1   | 1  | 3.85  | 0.83  | 1  | 3.85  | 1.09 | 1           | 1 | 1 | 1           |
| GO:0005498 | 10   | 9    | 90    | 1.02 | 0  | 0     | 0     | 1  | 10    | 2.15  | 0  | 0     | 0    | 1           | 1 | 1 | 1           |
| GO:0005499 | 1    | 0    | 0     | 0    | 1  | 100   | 28.63 | 0  | 0     | 0     | 0  | 0     | 0    | 1           | 1 | 1 | 1           |
| GO:0005501 | 3    | 2    | 66.67 | 0.75 | 0  | 0     | 0     | 1  | 33.33 | 7.18  | 0  | 0     | 0    | 1           | 1 | 1 | 1           |
| GO:0005504 | 5    | 4    | 80    | 0.91 | 0  | 0     | 0     | 1  | 20    | 4.31  | 0  | 0     | 0    | 1           | 1 | 1 | 1           |
| GO:0005505 | 14   | 14   | 100   | 1.13 | 0  | 0     | 0     | 0  | 0     | 0     | 0  | 0     | 0    | 1           | 1 | 1 | 1           |
| GO:0005506 | 35   | 34   | 97.14 | 1.1  | 0  | 0     | 0     | 1  | 2.86  | 0.62  | 0  | 0     | 0    | 1           | 1 | 1 | 1           |
| GO:0005507 | 52   | 41   | 78.85 | 0.89 | 4  | 7.69  | 2.2   | 7  | 13.46 | 2.9   | 0  | 0     | 0    | 1           | 1 | 1 | 1           |
| GO:0005509 | 621  | 535  | 86.15 | 0.98 | 18 | 2.9   | 0.83  | 32 | 5.15  | 1.11  | 36 | 5.8   | 1.64 | 1           | 1 | 1 | 1           |
| GO:0005514 | 10   | 9    | 90    | 1.02 | 0  | 0     | 0     | 1  | 10    | 2.15  | 0  | 0     | 0    | 1           | 1 | 1 | 1           |
| GO:0005515 | 1590 | 1433 | 90.13 | 1.02 | 33 | 2.08  | 0.59  | 74 | 4.65  | 1     | 50 | 3.14  | 0.89 | 1           | 1 | 1 | 1           |
| GO:0005516 | 83   | 73   | 87.95 | 1    | 3  | 3.61  | 1.03  | 3  | 3.61  | 0.78  | 4  | 4.82  | 1.36 | 1           | 1 | 1 | 1           |
| GO:0005518 | 2    | 2    | 100   | 1.13 | 0  | 0     | 0     | 0  | 0     | 0     | 0  | 0     | 0    | 1           | 1 | 1 | 1           |
| GO:0005519 | 11   | 11   | 100   | 1.13 | 0  | 0     | 0     | 0  | 0     | 0     | 0  | 0     | 0    | 1           | 1 | 1 | 1           |
| GO:0005520 | 17   | 14   | 82.35 | 0.93 | 2  | 11.76 | 3.37  | 0  | 0     | 0     | 1  | 5.88  | 1.66 | 1           | 1 | 1 | 1           |
| GO:0005521 | 1    | 1    | 100   | 1.13 | 0  | 0     | 0     | 0  | 0     | 0     | 0  | 0     | 0    | 1           | 1 | 1 | 1           |
| GO:0005522 | 4    | 3    | 75    | 0.85 | 0  | 0     | 0     | 1  | 25    | 5.38  | 0  | 0     | 0    | 1           | 1 | 1 | 1           |
| GO:0005523 | 7    | 6    | 85.71 | 0.97 | 0  | 0     | 0     | 0  | 0     | 0     | 1  | 14.29 | 4.03 | 1           | 1 | 1 | 1           |
| GO:0005524 | 1798 | 1655 | 92.05 | 1.04 | 46 | 2.56  | 0.73  | 67 | 3.73  | 0.8   | 30 | 1.67  | 0.47 | 4.48E-07    | 1 | 1 | 1           |
| GO:0005525 | 527  | 498  | 94.5  | 1.07 | 11 | 2.09  | 0.6   | 12 | 2.28  | 0.49  | 6  | 1.14  | 0.32 | 0.000162377 | 1 | 1 | 1           |
| GO:0005528 | 13   | 12   | 92.31 | 1.05 | 0  | 0     | 0     | 0  | 0     | 0     | 1  | 7.69  | 2.17 | 1           | 1 | 1 | 1           |
| GO:0005529 | 88   | 66   | 75    | 0.85 | 3  | 3.41  | 0.98  | 7  | 7.95  | 1.71  | 12 | 13.64 | 3.85 | 1           | 1 | 1 | 0.560080948 |
| GO:0005530 | 12   | 9    | 75    | 0.85 | 0  | 0     | 0     | 1  | 8.33  | 1.79  | 2  | 16.67 | 4.7  | 1           | 1 | 1 | 1           |
| GO:0005531 | 6    | 5    | 83.33 | 0.94 | 0  | 0     | 0     | 1  | 16.67 | 3.59  | 0  | 0     | 0    | 1           | 1 | 1 | 1           |
| GO:0005532 | 2    | 1    | 50    | 0.57 | 0  | 0     | 0     | 1  | 50    | 10.76 | 0  | 0     | 0    | 1           | 1 | 1 | 1           |
| GO:0005537 | 4    | 2    | 50    | 0.57 | 0  | 0     | 0     | 1  | 25    | 5.38  | 1  | 25    | 7.06 | 1           | 1 | 1 | 1           |
| GO:0005540 | 13   | 9    | 69.23 | 0.78 | 1  | 7.69  | 2.2   | 3  | 23.08 | 4.97  | 0  | 0     | 0    | 1           | 1 | 1 | 1           |
| GO:0005542 | 6    | 6    | 100   | 1.13 | 0  | 0     | 0     | 0  | 0     | 0     | 0  | 0     | 0    | 1           | 1 | 1 | 1           |
| GO:0005543 | 4    | 2    | 50    | 0.57 | 1  | 25    | 7.16  | 1  | 25    | 5.38  | 0  | 0     | 0    | 1           | 1 | 1 | 1           |
| GO:0005544 | 48   | 46   | 95.83 | 1.09 | 0  | 0     | 0     | 1  | 2.08  | 0.45  | 1  | 2.08  | 0.59 | 1           | 1 | 1 | 1           |
| GO:0005545 | 4    | 4    | 100   | 1.13 | 0  | 0     | 0     | 0  | 0     | 0     | 0  | 0     | 0    | 1           | 1 | 1 | 1           |

|             |      |      |       |      |     |      |       |     |       |       |    |       |       |          |   |             |          |
|-------------|------|------|-------|------|-----|------|-------|-----|-------|-------|----|-------|-------|----------|---|-------------|----------|
| GO:0005548  | 1    | 1    | 100   | 1.13 | 0   | 0    | 0     | 0   | 0     | 0     | 0  | 0     | 0     | 1        | 1 | 1           | 1        |
| GO:0005549  | 1    | 0    | 0     | 0    | 0   | 0    | 0     | 1   | 100   | 21.53 | 0  | 0     | 0     | 1        | 1 | 1           | 1        |
| GO:0005551  | 1    | 0    | 0     | 0    | 0   | 0    | 0     | 1   | 100   | 21.53 | 0  | 0     | 0     | 1        | 1 | 1           | 1        |
| GO:0005554  | 234  | 211  | 90.17 | 1.02 | 5   | 2.14 | 0.61  | 14  | 5.98  | 1.29  | 4  | 1.71  | 0.48  | 1        | 1 | 1           | 1        |
| GO:0005555  | 1    | 1    | 100   | 1.13 | 0   | 0    | 0     | 0   | 0     | 0     | 0  | 0     | 0     | 1        | 1 | 1           | 1        |
| GO:0005557  | 25   | 13   | 52    | 0.59 | 3   | 12   | 3.44  | 4   | 16    | 3.44  | 5  | 20    | 5.64  | 1        | 1 | 1           | 1        |
| GO:0005558  | 7    | 6    | 85.71 | 0.97 | 0   | 0    | 0     | 0   | 0     | 0     | 1  | 14.29 | 4.03  | 1        | 1 | 1           | 1        |
| GO:0005576  | 257  | 183  | 71.21 | 0.81 | 10  | 3.89 | 1.11  | 30  | 11.67 | 2.51  | 34 | 13.23 | 3.73  | 1        | 1 | 0.047933431 | 2.09E-06 |
| GO:0005577  | 1    | 0    | 0     | 0    | 0   | 0    | 0     | 0   | 0     | 0     | 1  | 100   | 28.22 | 1        | 1 | 1           | 1        |
| GO:0005578  | 174  | 138  | 79.31 | 0.9  | 11  | 6.32 | 1.81  | 16  | 9.2   | 1.98  | 9  | 5.17  | 1.46  | 1        | 1 | 1           | 1        |
| GO:0005579  | 6    | 0    | 0     | 0    | 0   | 0    | 0     | 0   | 0     | 0     | 6  | 100   | 28.22 | 1        | 1 | 1           | 1.24E-05 |
| GO:0005581  | 31   | 24   | 77.42 | 0.88 | 2   | 6.45 | 1.85  | 5   | 16.13 | 3.47  | 0  | 0     | 0     | 1        | 1 | 1           | 1        |
| GO:0005588  | 1    | 0    | 0     | 0    | 1   | 100  | 28.63 | 0   | 0     | 0     | 0  | 0     | 0     | 1        | 1 | 1           | 1        |
| GO:0005594  | 1    | 1    | 100   | 1.13 | 0   | 0    | 0     | 0   | 0     | 0     | 0  | 0     | 0     | 1        | 1 | 1           | 1        |
| GO:0005597  | 1    | 1    | 100   | 1.13 | 0   | 0    | 0     | 0   | 0     | 0     | 0  | 0     | 0     | 1        | 1 | 1           | 1        |
| GO:0005602  | 1    | 1    | 100   | 1.13 | 0   | 0    | 0     | 0   | 0     | 0     | 0  | 0     | 0     | 1        | 1 | 1           | 1        |
| GO:0005604  | 29   | 29   | 100   | 1.13 | 0   | 0    | 0     | 0   | 0     | 0     | 0  | 0     | 0     | 1        | 1 | 1           | 1        |
| GO:0005605  | 9    | 9    | 100   | 1.13 | 0   | 0    | 0     | 0   | 0     | 0     | 0  | 0     | 0     | 1        | 1 | 1           | 1        |
| GO:0005615  | 115  | 94   | 81.74 | 0.93 | 3   | 2.61 | 0.75  | 11  | 9.57  | 2.06  | 7  | 6.09  | 1.72  | 1        | 1 | 1           | 1        |
| GO:0005622  | 931  | 819  | 87.97 | 1    | 31  | 3.33 | 0.95  | 64  | 6.87  | 1.48  | 17 | 1.83  | 0.52  | 1        | 1 | 1           | 1        |
| GO:0005623  | 2    | 2    | 100   | 1.13 | 0   | 0    | 0     | 0   | 0     | 0     | 0  | 0     | 0     | 1        | 1 | 1           | 1        |
| GO:0005624  | 931  | 797  | 85.61 | 0.97 | 41  | 4.4  | 1.26  | 38  | 4.08  | 0.88  | 55 | 5.91  | 1.67  | 1        | 1 | 1           | 1        |
| GO:0005625  | 75   | 70   | 93.33 | 1.06 | 2   | 2.67 | 0.76  | 3   | 4     | 0.86  | 0  | 0     | 0     | 1        | 1 | 1           | 1        |
| GO:0005626  | 4    | 4    | 100   | 1.13 | 0   | 0    | 0     | 0   | 0     | 0     | 0  | 0     | 0     | 1        | 1 | 1           | 1        |
| GO:0005634  | 3168 | 2905 | 91.7  | 1.04 | 107 | 3.38 | 0.97  | 107 | 3.38  | 0.73  | 49 | 1.55  | 0.44  | 6.15E-12 | 1 | 1           | 1        |
| GO:0005634, | 1    | 1    | 100   | 1.13 | 0   | 0    | 0     | 0   | 0     | 0     | 0  | 0     | 0     | 1        | 1 | 1           | 1        |
| GO:0005635  | 31   | 29   | 93.55 | 1.06 | 0   | 0    | 0     | 1   | 3.23  | 0.69  | 1  | 3.23  | 0.91  | 1        | 1 | 1           | 1        |
| GO:0005637  | 9    | 9    | 100   | 1.13 | 0   | 0    | 0     | 0   | 0     | 0     | 0  | 0     | 0     | 1        | 1 | 1           | 1        |
| GO:0005638  | 15   | 15   | 100   | 1.13 | 0   | 0    | 0     | 0   | 0     | 0     | 0  | 0     | 0     | 1        | 1 | 1           | 1        |
| GO:0005639  | 1    | 1    | 100   | 1.13 | 0   | 0    | 0     | 0   | 0     | 0     | 0  | 0     | 0     | 1        | 1 | 1           | 1        |
| GO:0005640  | 5    | 5    | 100   | 1.13 | 0   | 0    | 0     | 0   | 0     | 0     | 0  | 0     | 0     | 1        | 1 | 1           | 1        |
| GO:0005643  | 55   | 54   | 98.18 | 1.11 | 0   | 0    | 0     | 1   | 1.82  | 0.39  | 0  | 0     | 0     | 1        | 1 | 1           | 1        |
| GO:0005645  | 1    | 1    | 100   | 1.13 | 0   | 0    | 0     | 0   | 0     | 0     | 0  | 0     | 0     | 1        | 1 | 1           | 1        |
| GO:0005648  | 10   | 10   | 100   | 1.13 | 0   | 0    | 0     | 0   | 0     | 0     | 0  | 0     | 0     | 1        | 1 | 1           | 1        |
| GO:0005652  | 10   | 10   | 100   | 1.13 | 0   | 0    | 0     | 0   | 0     | 0     | 0  | 0     | 0     | 1        | 1 | 1           | 1        |
| GO:0005653  | 16   | 16   | 100   | 1.13 | 0   | 0    | 0     | 0   | 0     | 0     | 0  | 0     | 0     | 1        | 1 | 1           | 1        |
| GO:0005654  | 46   | 41   | 89.13 | 1.01 | 2   | 4.35 | 1.24  | 2   | 4.35  | 0.94  | 1  | 2.17  | 0.61  | 1        | 1 | 1           | 1        |
| GO:0005655  | 7    | 7    | 100   | 1.13 | 0   | 0    | 0     | 0   | 0     | 0     | 0  | 0     | 0     | 1        | 1 | 1           | 1        |
| GO:0005657  | 5    | 5    | 100   | 1.13 | 0   | 0    | 0     | 0   | 0     | 0     | 0  | 0     | 0     | 1        | 1 | 1           | 1        |
| GO:0005658  | 3    | 3    | 100   | 1.13 | 0   | 0    | 0     | 0   | 0     | 0     | 0  | 0     | 0     | 1        | 1 | 1           | 1        |
| GO:0005659  | 4    | 4    | 100   | 1.13 | 0   | 0    | 0     | 0   | 0     | 0     | 0  | 0     | 0     | 1        | 1 | 1           | 1        |

|            |      |      |       |      |    |      |       |    |       |      |    |       |      |             |   |   |   |
|------------|------|------|-------|------|----|------|-------|----|-------|------|----|-------|------|-------------|---|---|---|
| GO:0005660 | 3    | 3    | 100   | 1.13 | 0  | 0    | 0     | 0  | 0     | 0    | 0  | 0     | 0    | 1           | 1 | 1 | 1 |
| GO:0005662 | 2    | 2    | 100   | 1.13 | 0  | 0    | 0     | 0  | 0     | 0    | 0  | 0     | 0    | 1           | 1 | 1 | 1 |
| GO:0005663 | 9    | 9    | 100   | 1.13 | 0  | 0    | 0     | 0  | 0     | 0    | 0  | 0     | 0    | 1           | 1 | 1 | 1 |
| GO:0005664 | 3    | 3    | 100   | 1.13 | 0  | 0    | 0     | 0  | 0     | 0    | 0  | 0     | 0    | 1           | 1 | 1 | 1 |
| GO:0005665 | 19   | 17   | 89.47 | 1.01 | 0  | 0    | 0     | 2  | 10.53 | 2.27 | 0  | 0     | 0    | 0           | 1 | 1 | 1 |
| GO:0005666 | 9    | 9    | 100   | 1.13 | 0  | 0    | 0     | 0  | 0     | 0    | 0  | 0     | 0    | 1           | 1 | 1 | 1 |
| GO:0005667 | 261  | 229  | 87.74 | 0.99 | 11 | 4.21 | 1.21  | 9  | 3.45  | 0.74 | 12 | 4.6   | 1.3  | 1           | 1 | 1 | 1 |
| GO:0005669 | 23   | 22   | 95.65 | 1.08 | 0  | 0    | 0     | 1  | 4.35  | 0.94 | 0  | 0     | 0    | 1           | 1 | 1 | 1 |
| GO:0005672 | 2    | 2    | 100   | 1.13 | 0  | 0    | 0     | 0  | 0     | 0    | 0  | 0     | 0    | 1           | 1 | 1 | 1 |
| GO:0005673 | 5    | 5    | 100   | 1.13 | 0  | 0    | 0     | 0  | 0     | 0    | 0  | 0     | 0    | 1           | 1 | 1 | 1 |
| GO:0005674 | 2    | 1    | 50    | 0.57 | 1  | 50   | 14.32 | 0  | 0     | 0    | 0  | 0     | 0    | 1           | 1 | 1 | 1 |
| GO:0005675 | 6    | 4    | 66.67 | 0.75 | 0  | 0    | 0     | 0  | 0     | 0    | 2  | 33.33 | 9.41 | 1           | 1 | 1 | 1 |
| GO:0005677 | 3    | 2    | 66.67 | 0.75 | 0  | 0    | 0     | 1  | 33.33 | 7.18 | 0  | 0     | 0    | 1           | 1 | 1 | 1 |
| GO:0005678 | 6    | 6    | 100   | 1.13 | 0  | 0    | 0     | 0  | 0     | 0    | 0  | 0     | 0    | 1           | 1 | 1 | 1 |
| GO:0005679 | 7    | 7    | 100   | 1.13 | 0  | 0    | 0     | 0  | 0     | 0    | 0  | 0     | 0    | 1           | 1 | 1 | 1 |
| GO:0005680 | 7    | 5    | 71.43 | 0.81 | 0  | 0    | 0     | 2  | 28.57 | 6.15 | 0  | 0     | 0    | 1           | 1 | 1 | 1 |
| GO:0005681 | 90   | 84   | 93.33 | 1.06 | 2  | 2.22 | 0.64  | 3  | 3.33  | 0.72 | 1  | 1.11  | 0.31 | 1           | 1 | 1 | 1 |
| GO:0005682 | 5    | 5    | 100   | 1.13 | 0  | 0    | 0     | 0  | 0     | 0    | 0  | 0     | 0    | 1           | 1 | 1 | 1 |
| GO:0005685 | 1    | 1    | 100   | 1.13 | 0  | 0    | 0     | 0  | 0     | 0    | 0  | 0     | 0    | 1           | 1 | 1 | 1 |
| GO:0005686 | 4    | 4    | 100   | 1.13 | 0  | 0    | 0     | 0  | 0     | 0    | 0  | 0     | 0    | 1           | 1 | 1 | 1 |
| GO:0005694 | 26   | 21   | 80.77 | 0.91 | 0  | 0    | 0     | 3  | 11.54 | 2.48 | 2  | 7.69  | 2.17 | 1           | 1 | 1 | 1 |
| GO:0005696 | 4    | 4    | 100   | 1.13 | 0  | 0    | 0     | 0  | 0     | 0    | 0  | 0     | 0    | 1           | 1 | 1 | 1 |
| GO:0005698 | 6    | 6    | 100   | 1.13 | 0  | 0    | 0     | 0  | 0     | 0    | 0  | 0     | 0    | 1           | 1 | 1 | 1 |
| GO:0005699 | 7    | 7    | 100   | 1.13 | 0  | 0    | 0     | 0  | 0     | 0    | 0  | 0     | 0    | 1           | 1 | 1 | 1 |
| GO:0005711 | 1    | 1    | 100   | 1.13 | 0  | 0    | 0     | 0  | 0     | 0    | 0  | 0     | 0    | 1           | 1 | 1 | 1 |
| GO:0005716 | 6    | 6    | 100   | 1.13 | 0  | 0    | 0     | 0  | 0     | 0    | 0  | 0     | 0    | 1           | 1 | 1 | 1 |
| GO:0005717 | 33   | 29   | 87.88 | 1    | 3  | 9.09 | 2.6   | 1  | 3.03  | 0.65 | 0  | 0     | 0    | 1           | 1 | 1 | 1 |
| GO:0005718 | 47   | 40   | 85.11 | 0.96 | 1  | 2.13 | 0.61  | 5  | 10.64 | 2.29 | 1  | 2.13  | 0.6  | 1           | 1 | 1 | 1 |
| GO:0005720 | 6    | 6    | 100   | 1.13 | 0  | 0    | 0     | 0  | 0     | 0    | 0  | 0     | 0    | 1           | 1 | 1 | 1 |
| GO:0005721 | 1    | 1    | 100   | 1.13 | 0  | 0    | 0     | 0  | 0     | 0    | 0  | 0     | 0    | 1           | 1 | 1 | 1 |
| GO:0005727 | 6    | 6    | 100   | 1.13 | 0  | 0    | 0     | 0  | 0     | 0    | 0  | 0     | 0    | 1           | 1 | 1 | 1 |
| GO:0005730 | 85   | 82   | 96.47 | 1.09 | 0  | 0    | 0     | 2  | 2.35  | 0.51 | 1  | 1.18  | 0.33 | 1           | 1 | 1 | 1 |
| GO:0005732 | 35   | 35   | 100   | 1.13 | 0  | 0    | 0     | 0  | 0     | 0    | 0  | 0     | 0    | 1           | 1 | 1 | 1 |
| GO:0005735 | 2    | 2    | 100   | 1.13 | 0  | 0    | 0     | 0  | 0     | 0    | 0  | 0     | 0    | 1           | 1 | 1 | 1 |
| GO:0005736 | 4    | 4    | 100   | 1.13 | 0  | 0    | 0     | 0  | 0     | 0    | 0  | 0     | 0    | 1           | 1 | 1 | 1 |
| GO:0005737 | 884  | 821  | 92.87 | 1.05 | 26 | 2.94 | 0.84  | 22 | 2.49  | 0.54 | 15 | 1.7   | 0.48 | 0.000325324 | 1 | 1 | 1 |
| GO:0005739 | 1206 | 1130 | 93.7  | 1.06 | 21 | 1.74 | 0.5   | 42 | 3.48  | 0.75 | 13 | 1.08  | 0.3  | 1.23E-09    | 1 | 1 | 1 |
| GO:0005740 | 24   | 24   | 100   | 1.13 | 0  | 0    | 0     | 0  | 0     | 0    | 0  | 0     | 0    | 1           | 1 | 1 | 1 |
| GO:0005741 | 61   | 57   | 93.44 | 1.06 | 2  | 3.28 | 0.94  | 1  | 1.64  | 0.35 | 1  | 1.64  | 0.46 | 1           | 1 | 1 | 1 |
| GO:0005743 | 143  | 132  | 92.31 | 1.05 | 2  | 1.4  | 0.4   | 7  | 4.9   | 1.05 | 2  | 1.4   | 0.39 | 1           | 1 | 1 | 1 |
| GO:0005744 | 19   | 17   | 89.47 | 1.01 | 0  | 0    | 0     | 2  | 10.53 | 2.27 | 0  | 0     | 0    | 1           | 1 | 1 | 1 |

|            |     |     |       |      |    |      |      |    |       |      |    |       |      |          |   |   |             |
|------------|-----|-----|-------|------|----|------|------|----|-------|------|----|-------|------|----------|---|---|-------------|
| GO:0005746 | 30  | 26  | 86.67 | 0.98 | 1  | 3.33 | 0.95 | 3  | 10    | 2.15 | 0  | 0     | 0    | 1        | 1 | 1 | 1           |
| GO:0005747 | 3   | 3   | 100   | 1.13 | 0  | 0    | 0    | 0  | 0     | 0    | 0  | 0     | 0    | 1        | 1 | 1 | 1           |
| GO:0005748 | 35  | 32  | 91.43 | 1.04 | 1  | 2.86 | 0.82 | 1  | 2.86  | 0.62 | 1  | 2.86  | 0.81 | 1        | 1 | 1 | 1           |
| GO:0005751 | 7   | 5   | 71.43 | 0.81 | 0  | 0    | 0    | 2  | 28.57 | 6.15 | 0  | 0     | 0    | 1        | 1 | 1 | 1           |
| GO:0005752 | 19  | 19  | 100   | 1.13 | 0  | 0    | 0    | 0  | 0     | 0    | 0  | 0     | 0    | 1        | 1 | 1 | 1           |
| GO:0005753 | 36  | 31  | 86.11 | 0.98 | 1  | 2.78 | 0.8  | 4  | 11.11 | 2.39 | 0  | 0     | 0    | 1        | 1 | 1 | 1           |
| GO:0005758 | 7   | 7   | 100   | 1.13 | 0  | 0    | 0    | 0  | 0     | 0    | 0  | 0     | 0    | 1        | 1 | 1 | 1           |
| GO:0005759 | 19  | 16  | 84.21 | 0.95 | 0  | 0    | 0    | 2  | 10.53 | 2.27 | 1  | 5.26  | 1.49 | 1        | 1 | 1 | 1           |
| GO:0005760 | 2   | 2   | 100   | 1.13 | 0  | 0    | 0    | 0  | 0     | 0    | 0  | 0     | 0    | 1        | 1 | 1 | 1           |
| GO:0005761 | 19  | 19  | 100   | 1.13 | 0  | 0    | 0    | 0  | 0     | 0    | 0  | 0     | 0    | 1        | 1 | 1 | 1           |
| GO:0005762 | 36  | 33  | 91.67 | 1.04 | 0  | 0    | 0    | 3  | 8.33  | 1.79 | 0  | 0     | 0    | 1        | 1 | 1 | 1           |
| GO:0005763 | 34  | 34  | 100   | 1.13 | 0  | 0    | 0    | 0  | 0     | 0    | 0  | 0     | 0    | 1        | 1 | 1 | 1           |
| GO:0005764 | 259 | 225 | 86.87 | 0.98 | 11 | 4.25 | 1.22 | 11 | 4.25  | 0.91 | 12 | 4.63  | 1.31 | 1        | 1 | 1 | 1           |
| GO:0005765 | 5   | 4   | 80    | 0.91 | 0  | 0    | 0    | 1  | 20    | 4.31 | 0  | 0     | 0    | 1        | 1 | 1 | 1           |
| GO:0005768 | 43  | 43  | 100   | 1.13 | 0  | 0    | 0    | 0  | 0     | 0    | 0  | 0     | 0    | 1        | 1 | 1 | 1           |
| GO:0005769 | 28  | 27  | 96.43 | 1.09 | 0  | 0    | 0    | 1  | 3.57  | 0.77 | 0  | 0     | 0    | 1        | 1 | 1 | 1           |
| GO:0005770 | 25  | 24  | 96    | 1.09 | 0  | 0    | 0    | 1  | 4     | 0.86 | 0  | 0     | 0    | 1        | 1 | 1 | 1           |
| GO:0005771 | 9   | 7   | 77.78 | 0.88 | 0  | 0    | 0    | 2  | 22.22 | 4.78 | 0  | 0     | 0    | 1        | 1 | 1 | 1           |
| GO:0005773 | 4   | 4   | 100   | 1.13 | 0  | 0    | 0    | 0  | 0     | 0    | 0  | 0     | 0    | 1        | 1 | 1 | 1           |
| GO:0005776 | 2   | 2   | 100   | 1.13 | 0  | 0    | 0    | 0  | 0     | 0    | 0  | 0     | 0    | 1        | 1 | 1 | 1           |
| GO:0005777 | 99  | 88  | 88.89 | 1.01 | 4  | 4.04 | 1.16 | 0  | 0     | 0    | 7  | 7.07  | 2    | 1        | 1 | 1 | 1           |
| GO:0005778 | 7   | 7   | 100   | 1.13 | 0  | 0    | 0    | 0  | 0     | 0    | 0  | 0     | 0    | 1        | 1 | 1 | 1           |
| GO:0005779 | 5   | 5   | 100   | 1.13 | 0  | 0    | 0    | 0  | 0     | 0    | 0  | 0     | 0    | 1        | 1 | 1 | 1           |
| GO:0005782 | 6   | 6   | 100   | 1.13 | 0  | 0    | 0    | 0  | 0     | 0    | 0  | 0     | 0    | 1        | 1 | 1 | 1           |
| GO:0005783 | 495 | 455 | 91.92 | 1.04 | 10 | 2.02 | 0.58 | 13 | 2.63  | 0.57 | 17 | 3.43  | 0.97 | 1        | 1 | 1 | 1           |
| GO:0005784 | 5   | 5   | 100   | 1.13 | 0  | 0    | 0    | 0  | 0     | 0    | 0  | 0     | 0    | 1        | 1 | 1 | 1           |
| GO:0005785 | 2   | 2   | 100   | 1.13 | 0  | 0    | 0    | 0  | 0     | 0    | 0  | 0     | 0    | 1        | 1 | 1 | 1           |
| GO:0005786 | 26  | 26  | 100   | 1.13 | 0  | 0    | 0    | 0  | 0     | 0    | 0  | 0     | 0    | 1        | 1 | 1 | 1           |
| GO:0005788 | 7   | 7   | 100   | 1.13 | 0  | 0    | 0    | 0  | 0     | 0    | 0  | 0     | 0    | 1        | 1 | 1 | 1           |
| GO:0005789 | 38  | 35  | 92.11 | 1.04 | 3  | 7.89 | 2.26 | 0  | 0     | 0    | 0  | 0     | 0    | 1        | 1 | 1 | 1           |
| GO:0005790 | 3   | 3   | 100   | 1.13 | 0  | 0    | 0    | 0  | 0     | 0    | 0  | 0     | 0    | 1        | 1 | 1 | 1           |
| GO:0005792 | 114 | 90  | 78.95 | 0.89 | 2  | 1.75 | 0.5  | 7  | 6.14  | 1.32 | 15 | 13.16 | 3.71 | 1        | 1 | 1 | 0.136029022 |
| GO:0005793 | 7   | 7   | 100   | 1.13 | 0  | 0    | 0    | 0  | 0     | 0    | 0  | 0     | 0    | 1        | 1 | 1 | 1           |
| GO:0005794 | 441 | 432 | 97.96 | 1.11 | 2  | 0.45 | 0.13 | 5  | 1.13  | 0.24 | 2  | 0.45  | 0.13 | 2.84E-12 | 1 | 1 | 1           |
| GO:0005795 | 25  | 25  | 100   | 1.13 | 0  | 0    | 0    | 0  | 0     | 0    | 0  | 0     | 0    | 1        | 1 | 1 | 1           |
| GO:0005796 | 2   | 2   | 100   | 1.13 | 0  | 0    | 0    | 0  | 0     | 0    | 0  | 0     | 0    | 1        | 1 | 1 | 1           |
| GO:0005798 | 1   | 1   | 100   | 1.13 | 0  | 0    | 0    | 0  | 0     | 0    | 0  | 0     | 0    | 1        | 1 | 1 | 1           |
| GO:0005799 | 1   | 1   | 100   | 1.13 | 0  | 0    | 0    | 0  | 0     | 0    | 0  | 0     | 0    | 1        | 1 | 1 | 1           |
| GO:0005800 | 1   | 1   | 100   | 1.13 | 0  | 0    | 0    | 0  | 0     | 0    | 0  | 0     | 0    | 1        | 1 | 1 | 1           |
| GO:0005801 | 3   | 3   | 100   | 1.13 | 0  | 0    | 0    | 0  | 0     | 0    | 0  | 0     | 0    | 1        | 1 | 1 | 1           |
| GO:0005802 | 29  | 29  | 100   | 1.13 | 0  | 0    | 0    | 0  | 0     | 0    | 0  | 0     | 0    | 1        | 1 | 1 | 1           |



|            |     |     |       |      |    |       |       |    |       |      |   |       |       |             |          |   |   |
|------------|-----|-----|-------|------|----|-------|-------|----|-------|------|---|-------|-------|-------------|----------|---|---|
| GO:0005803 | 12  | 12  | 100   | 1.13 | 0  | 0     | 0     | 0  | 0     | 0    | 0 | 0     | 0     | 1           | 1        | 1 | 1 |
| GO:0005804 | 1   | 0   | 0     | 0    | 1  | 100   | 28.63 | 0  | 0     | 0    | 0 | 0     | 0     | 1           | 1        | 1 | 1 |
| GO:0005811 | 8   | 8   | 100   | 1.13 | 0  | 0     | 0     | 0  | 0     | 0    | 0 | 0     | 0     | 1           | 1        | 1 | 1 |
| GO:0005813 | 32  | 32  | 100   | 1.13 | 0  | 0     | 0     | 0  | 0     | 0    | 0 | 0     | 0     | 1           | 1        | 1 | 1 |
| GO:0005814 | 6   | 5   | 83.33 | 0.94 | 1  | 16.67 | 4.77  | 0  | 0     | 0    | 0 | 0     | 0     | 1           | 1        | 1 | 1 |
| GO:0005815 | 1   | 1   | 100   | 1.13 | 0  | 0     | 0     | 0  | 0     | 0    | 0 | 0     | 0     | 1           | 1        | 1 | 1 |
| GO:0005816 | 2   | 2   | 100   | 1.13 | 0  | 0     | 0     | 0  | 0     | 0    | 0 | 0     | 0     | 1           | 1        | 1 | 1 |
| GO:0005819 | 6   | 6   | 100   | 1.13 | 0  | 0     | 0     | 0  | 0     | 0    | 0 | 0     | 0     | 1           | 1        | 1 | 1 |
| GO:0005827 | 1   | 1   | 100   | 1.13 | 0  | 0     | 0     | 0  | 0     | 0    | 0 | 0     | 0     | 1           | 1        | 1 | 1 |
| GO:0005829 | 267 | 255 | 95.51 | 1.08 | 0  | 0     | 0     | 8  | 3     | 0.65 | 4 | 1.5   | 0.42  | 0.022770101 | 1        | 1 | 1 |
| GO:0005830 | 50  | 41  | 82    | 0.93 | 3  | 6     | 1.72  | 6  | 12    | 2.58 | 0 | 0     | 0     | 1           | 1        | 1 | 1 |
| GO:0005831 | 3   | 3   | 100   | 1.13 | 0  | 0     | 0     | 0  | 0     | 0    | 0 | 0     | 0     | 1           | 1        | 1 | 1 |
| GO:0005833 | 11  | 2   | 18.18 | 0.21 | 8  | 72.73 | 20.82 | 0  | 0     | 0    | 1 | 9.09  | 2.57  | 1           | 1.74E-06 | 1 | 1 |
| GO:0005834 | 43  | 39  | 90.7  | 1.03 | 3  | 6.98  | 2     | 1  | 2.33  | 0.5  | 0 | 0     | 0     | 1           | 1        | 1 | 1 |
| GO:0005837 | 13  | 11  | 84.62 | 0.96 | 0  | 0     | 0     | 2  | 15.38 | 3.31 | 0 | 0     | 0     | 1           | 1        | 1 | 1 |
| GO:0005838 | 17  | 16  | 94.12 | 1.07 | 0  | 0     | 0     | 1  | 5.88  | 1.27 | 0 | 0     | 0     | 1           | 1        | 1 | 1 |
| GO:0005839 | 47  | 43  | 91.49 | 1.04 | 0  | 0     | 0     | 4  | 8.51  | 1.83 | 0 | 0     | 0     | 1           | 1        | 1 | 1 |
| GO:0005840 | 262 | 231 | 88.17 | 1    | 10 | 3.82  | 1.09  | 18 | 6.87  | 1.48 | 3 | 1.15  | 0.32  | 1           | 1        | 1 | 1 |
| GO:0005842 | 24  | 24  | 100   | 1.13 | 0  | 0     | 0     | 0  | 0     | 0    | 0 | 0     | 0     | 1           | 1        | 1 | 1 |
| GO:0005843 | 28  | 26  | 92.86 | 1.05 | 0  | 0     | 0     | 2  | 7.14  | 1.54 | 0 | 0     | 0     | 1           | 1        | 1 | 1 |
| GO:0005844 | 3   | 2   | 66.67 | 0.75 | 0  | 0     | 0     | 0  | 0     | 0    | 1 | 33.33 | 9.41  | 1           | 1        | 1 | 1 |
| GO:0005850 | 1   | 1   | 100   | 1.13 | 0  | 0     | 0     | 0  | 0     | 0    | 0 | 0     | 0     | 1           | 1        | 1 | 1 |
| GO:0005851 | 7   | 7   | 100   | 1.13 | 0  | 0     | 0     | 0  | 0     | 0    | 0 | 0     | 0     | 1           | 1        | 1 | 1 |
| GO:0005852 | 16  | 13  | 81.25 | 0.92 | 0  | 0     | 0     | 3  | 18.75 | 4.04 | 0 | 0     | 0     | 1           | 1        | 1 | 1 |
| GO:0005853 | 9   | 9   | 100   | 1.13 | 0  | 0     | 0     | 0  | 0     | 0    | 0 | 0     | 0     | 1           | 1        | 1 | 1 |
| GO:0005856 | 357 | 327 | 91.6  | 1.04 | 10 | 2.8   | 0.8   | 13 | 3.64  | 0.78 | 7 | 1.96  | 0.55  | 1           | 1        | 1 | 1 |
| GO:0005858 | 5   | 5   | 100   | 1.13 | 0  | 0     | 0     | 0  | 0     | 0    | 0 | 0     | 0     | 1           | 1        | 1 | 1 |
| GO:0005859 | 5   | 5   | 100   | 1.13 | 0  | 0     | 0     | 0  | 0     | 0    | 0 | 0     | 0     | 1           | 1        | 1 | 1 |
| GO:0005860 | 1   | 1   | 100   | 1.13 | 0  | 0     | 0     | 0  | 0     | 0    | 0 | 0     | 0     | 1           | 1        | 1 | 1 |
| GO:0005861 | 3   | 3   | 100   | 1.13 | 0  | 0     | 0     | 0  | 0     | 0    | 0 | 0     | 0     | 1           | 1        | 1 | 1 |
| GO:0005862 | 6   | 6   | 100   | 1.13 | 0  | 0     | 0     | 0  | 0     | 0    | 0 | 0     | 0     | 1           | 1        | 1 | 1 |
| GO:0005863 | 3   | 2   | 66.67 | 0.75 | 0  | 0     | 0     | 1  | 33.33 | 7.18 | 0 | 0     | 0     | 1           | 1        | 1 | 1 |
| GO:0005865 | 1   | 1   | 100   | 1.13 | 0  | 0     | 0     | 0  | 0     | 0    | 0 | 0     | 0     | 1           | 1        | 1 | 1 |
| GO:0005868 | 15  | 15  | 100   | 1.13 | 0  | 0     | 0     | 0  | 0     | 0    | 0 | 0     | 0     | 1           | 1        | 1 | 1 |
| GO:0005869 | 13  | 13  | 100   | 1.13 | 0  | 0     | 0     | 0  | 0     | 0    | 0 | 0     | 0     | 1           | 1        | 1 | 1 |
| GO:0005871 | 31  | 30  | 96.77 | 1.1  | 1  | 3.23  | 0.92  | 0  | 0     | 0    | 0 | 0     | 0     | 1           | 1        | 1 | 1 |
| GO:0005874 | 40  | 34  | 85    | 0.96 | 2  | 5     | 1.43  | 1  | 2.5   | 0.54 | 3 | 7.5   | 2.12  | 1           | 1        | 1 | 1 |
| GO:0005875 | 79  | 75  | 94.94 | 1.07 | 2  | 2.53  | 0.72  | 2  | 2.53  | 0.54 | 0 | 0     | 0     | 1           | 1        | 1 | 1 |
| GO:0005876 | 2   | 1   | 50    | 0.57 | 1  | 50    | 14.32 | 0  | 0     | 0    | 0 | 0     | 0     | 1           | 1        | 1 | 1 |
| GO:0005881 | 2   | 1   | 50    | 0.57 | 0  | 0     | 0     | 0  | 0     | 0    | 1 | 50    | 14.11 | 1           | 1        | 1 | 1 |
| GO:0005882 | 63  | 54  | 85.71 | 0.97 | 0  | 0     | 0     | 9  | 14.29 | 3.08 | 0 | 0     | 0     | 1           | 1        | 1 | 1 |

|            |     |     |       |      |    |       |       |    |       |       |    |       |      |   |   |   |             |
|------------|-----|-----|-------|------|----|-------|-------|----|-------|-------|----|-------|------|---|---|---|-------------|
| GO:0005883 | 2   | 2   | 100   | 1.13 | 0  | 0     | 0     | 0  | 0     | 0     | 0  | 0     | 1    | 1 | 1 | 1 |             |
| GO:0005884 | 28  | 27  | 96.43 | 1.09 | 0  | 0     | 0     | 0  | 0     | 0     | 1  | 3.57  | 1.01 | 1 | 1 | 1 | 1           |
| GO:0005885 | 39  | 39  | 100   | 1.13 | 0  | 0     | 0     | 0  | 0     | 0     | 0  | 0     | 0    | 1 | 1 | 1 | 1           |
| GO:0005886 | 382 | 316 | 82.72 | 0.94 | 13 | 3.4   | 0.97  | 23 | 6.02  | 1.3   | 30 | 7.85  | 2.22 | 1 | 1 | 1 | 0.911489533 |
| GO:0005887 | 486 | 408 | 83.95 | 0.95 | 24 | 4.94  | 1.41  | 23 | 4.73  | 1.02  | 31 | 6.38  | 1.8  | 1 | 1 | 1 | 1           |
| GO:0005888 | 3   | 3   | 100   | 1.13 | 0  | 0     | 0     | 0  | 0     | 0     | 0  | 0     | 0    | 1 | 1 | 1 | 1           |
| GO:0005889 | 2   | 2   | 100   | 1.13 | 0  | 0     | 0     | 0  | 0     | 0     | 0  | 0     | 0    | 1 | 1 | 1 | 1           |
| GO:0005890 | 11  | 11  | 100   | 1.13 | 0  | 0     | 0     | 0  | 0     | 0     | 0  | 0     | 0    | 1 | 1 | 1 | 1           |
| GO:0005891 | 6   | 3   | 50    | 0.57 | 3  | 50    | 14.32 | 0  | 0     | 0     | 0  | 0     | 0    | 1 | 1 | 1 | 1           |
| GO:0005896 | 2   | 2   | 100   | 1.13 | 0  | 0     | 0     | 0  | 0     | 0     | 0  | 0     | 0    | 1 | 1 | 1 | 1           |
| GO:0005901 | 12  | 10  | 83.33 | 0.94 | 1  | 8.33  | 2.39  | 1  | 8.33  | 1.79  | 0  | 0     | 0    | 1 | 1 | 1 | 1           |
| GO:0005902 | 4   | 3   | 75    | 0.85 | 0  | 0     | 0     | 1  | 25    | 5.38  | 0  | 0     | 0    | 1 | 1 | 1 | 1           |
| GO:0005903 | 4   | 3   | 75    | 0.85 | 0  | 0     | 0     | 1  | 25    | 5.38  | 0  | 0     | 0    | 1 | 1 | 1 | 1           |
| GO:0005905 | 43  | 42  | 97.67 | 1.11 | 0  | 0     | 0     | 1  | 2.33  | 0.5   | 0  | 0     | 0    | 1 | 1 | 1 | 1           |
| GO:0005906 | 14  | 13  | 92.86 | 1.05 | 0  | 0     | 0     | 1  | 7.14  | 1.54  | 0  | 0     | 0    | 1 | 1 | 1 | 1           |
| GO:0005909 | 4   | 4   | 100   | 1.13 | 0  | 0     | 0     | 0  | 0     | 0     | 0  | 0     | 0    | 1 | 1 | 1 | 1           |
| GO:0005911 | 8   | 8   | 100   | 1.13 | 0  | 0     | 0     | 0  | 0     | 0     | 0  | 0     | 0    | 1 | 1 | 1 | 1           |
| GO:0005912 | 12  | 12  | 100   | 1.13 | 0  | 0     | 0     | 0  | 0     | 0     | 0  | 0     | 0    | 1 | 1 | 1 | 1           |
| GO:0005913 | 4   | 4   | 100   | 1.13 | 0  | 0     | 0     | 0  | 0     | 0     | 0  | 0     | 0    | 1 | 1 | 1 | 1           |
| GO:0005915 | 6   | 6   | 100   | 1.13 | 0  | 0     | 0     | 0  | 0     | 0     | 0  | 0     | 0    | 1 | 1 | 1 | 1           |
| GO:0005916 | 1   | 0   | 0     | 0    | 0  | 0     | 0     | 1  | 100   | 21.53 | 0  | 0     | 0    | 1 | 1 | 1 | 1           |
| GO:0005918 | 1   | 1   | 100   | 1.13 | 0  | 0     | 0     | 0  | 0     | 0     | 0  | 0     | 0    | 1 | 1 | 1 | 1           |
| GO:0005921 | 11  | 8   | 72.73 | 0.82 | 1  | 9.09  | 2.6   | 0  | 0     | 0     | 2  | 18.18 | 5.13 | 1 | 1 | 1 | 1           |
| GO:0005922 | 9   | 6   | 66.67 | 0.75 | 1  | 11.11 | 3.18  | 0  | 0     | 0     | 2  | 22.22 | 6.27 | 1 | 1 | 1 | 1           |
| GO:0005923 | 25  | 23  | 92    | 1.04 | 1  | 4     | 1.15  | 0  | 0     | 0     | 1  | 4     | 1.13 | 1 | 1 | 1 | 1           |
| GO:0005925 | 11  | 9   | 81.82 | 0.93 | 1  | 9.09  | 2.6   | 1  | 9.09  | 1.96  | 0  | 0     | 0    | 1 | 1 | 1 | 1           |
| GO:0005929 | 7   | 7   | 100   | 1.13 | 0  | 0     | 0     | 0  | 0     | 0     | 0  | 0     | 0    | 1 | 1 | 1 | 1           |
| GO:0005930 | 2   | 2   | 100   | 1.13 | 0  | 0     | 0     | 0  | 0     | 0     | 0  | 0     | 0    | 1 | 1 | 1 | 1           |
| GO:0005932 | 2   | 2   | 100   | 1.13 | 0  | 0     | 0     | 0  | 0     | 0     | 0  | 0     | 0    | 1 | 1 | 1 | 1           |
| GO:0005938 | 12  | 12  | 100   | 1.13 | 0  | 0     | 0     | 0  | 0     | 0     | 0  | 0     | 0    | 1 | 1 | 1 | 1           |
| GO:0005942 | 16  | 15  | 93.75 | 1.06 | 1  | 6.25  | 1.79  | 0  | 0     | 0     | 0  | 0     | 0    | 1 | 1 | 1 | 1           |
| GO:0005945 | 9   | 9   | 100   | 1.13 | 0  | 0     | 0     | 0  | 0     | 0     | 0  | 0     | 0    | 1 | 1 | 1 | 1           |
| GO:0005952 | 3   | 1   | 33.33 | 0.38 | 0  | 0     | 0     | 1  | 33.33 | 7.18  | 1  | 33.33 | 9.41 | 1 | 1 | 1 | 1           |
| GO:0005954 | 4   | 4   | 100   | 1.13 | 0  | 0     | 0     | 0  | 0     | 0     | 0  | 0     | 0    | 1 | 1 | 1 | 1           |
| GO:0005956 | 2   | 2   | 100   | 1.13 | 0  | 0     | 0     | 0  | 0     | 0     | 0  | 0     | 0    | 1 | 1 | 1 | 1           |
| GO:0005960 | 1   | 1   | 100   | 1.13 | 0  | 0     | 0     | 0  | 0     | 0     | 0  | 0     | 0    | 1 | 1 | 1 | 1           |
| GO:0005962 | 2   | 2   | 100   | 1.13 | 0  | 0     | 0     | 0  | 0     | 0     | 0  | 0     | 0    | 1 | 1 | 1 | 1           |
| GO:0005964 | 7   | 7   | 100   | 1.13 | 0  | 0     | 0     | 0  | 0     | 0     | 0  | 0     | 0    | 1 | 1 | 1 | 1           |
| GO:0005967 | 2   | 2   | 100   | 1.13 | 0  | 0     | 0     | 0  | 0     | 0     | 0  | 0     | 0    | 1 | 1 | 1 | 1           |
| GO:0005971 | 8   | 8   | 100   | 1.13 | 0  | 0     | 0     | 0  | 0     | 0     | 0  | 0     | 0    | 1 | 1 | 1 | 1           |
| GO:0005975 | 222 | 205 | 92.34 | 1.05 | 4  | 1.8   | 0.52  | 4  | 1.8   | 0.39  | 9  | 4.05  | 1.14 | 1 | 1 | 1 | 1           |

|            |    |    |       |      |   |      |      |   |       |       |   |      |       |   |   |   |   |
|------------|----|----|-------|------|---|------|------|---|-------|-------|---|------|-------|---|---|---|---|
| GO:0005977 | 37 | 37 | 100   | 1.13 | 0 | 0    | 0    | 0 | 0     | 0     | 0 | 0    | 0     | 1 | 1 | 1 | 1 |
| GO:0005978 | 12 | 10 | 83.33 | 0.94 | 0 | 0    | 0    | 2 | 16.67 | 3.59  | 0 | 0    | 0     | 1 | 1 | 1 | 1 |
| GO:0005980 | 6  | 6  | 100   | 1.13 | 0 | 0    | 0    | 0 | 0     | 0     | 0 | 0    | 0     | 1 | 1 | 1 | 1 |
| GO:0005991 | 1  | 1  | 100   | 1.13 | 0 | 0    | 0    | 0 | 0     | 0     | 0 | 0    | 0     | 1 | 1 | 1 | 1 |
| GO:0005993 | 1  | 1  | 100   | 1.13 | 0 | 0    | 0    | 0 | 0     | 0     | 0 | 0    | 0     | 1 | 1 | 1 | 1 |
| GO:0005997 | 2  | 1  | 50    | 0.57 | 0 | 0    | 0    | 1 | 50    | 10.76 | 0 | 0    | 0     | 1 | 1 | 1 | 1 |
| GO:0006002 | 6  | 6  | 100   | 1.13 | 0 | 0    | 0    | 0 | 0     | 0     | 0 | 0    | 0     | 1 | 1 | 1 | 1 |
| GO:0006003 | 4  | 4  | 100   | 1.13 | 0 | 0    | 0    | 0 | 0     | 0     | 0 | 0    | 0     | 1 | 1 | 1 | 1 |
| GO:0006004 | 5  | 5  | 100   | 1.13 | 0 | 0    | 0    | 0 | 0     | 0     | 0 | 0    | 0     | 1 | 1 | 1 | 1 |
| GO:0006006 | 27 | 26 | 96.3  | 1.09 | 1 | 3.7  | 1.06 | 0 | 0     | 0     | 0 | 0    | 0     | 1 | 1 | 1 | 1 |
| GO:0006007 | 2  | 2  | 100   | 1.13 | 0 | 0    | 0    | 0 | 0     | 0     | 0 | 0    | 0     | 1 | 1 | 1 | 1 |
| GO:0006011 | 1  | 1  | 100   | 1.13 | 0 | 0    | 0    | 0 | 0     | 0     | 0 | 0    | 0     | 1 | 1 | 1 | 1 |
| GO:0006012 | 11 | 8  | 72.73 | 0.82 | 1 | 9.09 | 2.6  | 1 | 9.09  | 1.96  | 1 | 9.09 | 2.57  | 1 | 1 | 1 | 1 |
| GO:0006013 | 3  | 3  | 100   | 1.13 | 0 | 0    | 0    | 0 | 0     | 0     | 0 | 0    | 0     | 1 | 1 | 1 | 1 |
| GO:0006020 | 15 | 15 | 100   | 1.13 | 0 | 0    | 0    | 0 | 0     | 0     | 0 | 0    | 0     | 1 | 1 | 1 | 1 |
| GO:0006021 | 2  | 2  | 100   | 1.13 | 0 | 0    | 0    | 0 | 0     | 0     | 0 | 0    | 0     | 1 | 1 | 1 | 1 |
| GO:0006024 | 2  | 2  | 100   | 1.13 | 0 | 0    | 0    | 0 | 0     | 0     | 0 | 0    | 0     | 1 | 1 | 1 | 1 |
| GO:0006027 | 5  | 4  | 80    | 0.91 | 0 | 0    | 0    | 1 | 20    | 4.31  | 0 | 0    | 0     | 1 | 1 | 1 | 1 |
| GO:0006029 | 2  | 2  | 100   | 1.13 | 0 | 0    | 0    | 0 | 0     | 0     | 0 | 0    | 0     | 1 | 1 | 1 | 1 |
| GO:0006032 | 1  | 0  | 0     | 0    | 0 | 0    | 0    | 0 | 0     | 0     | 1 | 100  | 28.22 | 1 | 1 | 1 | 1 |
| GO:0006041 | 4  | 4  | 100   | 1.13 | 0 | 0    | 0    | 0 | 0     | 0     | 0 | 0    | 0     | 1 | 1 | 1 | 1 |
| GO:0006044 | 9  | 9  | 100   | 1.13 | 0 | 0    | 0    | 0 | 0     | 0     | 0 | 0    | 0     | 1 | 1 | 1 | 1 |
| GO:0006048 | 9  | 9  | 100   | 1.13 | 0 | 0    | 0    | 0 | 0     | 0     | 0 | 0    | 0     | 1 | 1 | 1 | 1 |
| GO:0006054 | 2  | 2  | 100   | 1.13 | 0 | 0    | 0    | 0 | 0     | 0     | 0 | 0    | 0     | 1 | 1 | 1 | 1 |
| GO:0006055 | 1  | 1  | 100   | 1.13 | 0 | 0    | 0    | 0 | 0     | 0     | 0 | 0    | 0     | 1 | 1 | 1 | 1 |
| GO:0006060 | 1  | 1  | 100   | 1.13 | 0 | 0    | 0    | 0 | 0     | 0     | 0 | 0    | 0     | 1 | 1 | 1 | 1 |
| GO:0006066 | 2  | 2  | 100   | 1.13 | 0 | 0    | 0    | 0 | 0     | 0     | 0 | 0    | 0     | 1 | 1 | 1 | 1 |
| GO:0006069 | 2  | 2  | 100   | 1.13 | 0 | 0    | 0    | 0 | 0     | 0     | 0 | 0    | 0     | 1 | 1 | 1 | 1 |
| GO:0006071 | 12 | 12 | 100   | 1.13 | 0 | 0    | 0    | 0 | 0     | 0     | 0 | 0    | 0     | 1 | 1 | 1 | 1 |
| GO:0006072 | 8  | 7  | 87.5  | 0.99 | 1 | 12.5 | 3.58 | 0 | 0     | 0     | 0 | 0    | 0     | 1 | 1 | 1 | 1 |
| GO:0006081 | 9  | 9  | 100   | 1.13 | 0 | 0    | 0    | 0 | 0     | 0     | 0 | 0    | 0     | 1 | 1 | 1 | 1 |
| GO:0006083 | 1  | 0  | 0     | 0    | 0 | 0    | 0    | 0 | 0     | 0     | 1 | 100  | 28.22 | 1 | 1 | 1 | 1 |
| GO:0006085 | 7  | 7  | 100   | 1.13 | 0 | 0    | 0    | 0 | 0     | 0     | 0 | 0    | 0     | 1 | 1 | 1 | 1 |
| GO:0006086 | 4  | 4  | 100   | 1.13 | 0 | 0    | 0    | 0 | 0     | 0     | 0 | 0    | 0     | 1 | 1 | 1 | 1 |
| GO:0006090 | 3  | 3  | 100   | 1.13 | 0 | 0    | 0    | 0 | 0     | 0     | 0 | 0    | 0     | 1 | 1 | 1 | 1 |
| GO:0006091 | 33 | 33 | 100   | 1.13 | 0 | 0    | 0    | 0 | 0     | 0     | 0 | 0    | 0     | 1 | 1 | 1 | 1 |
| GO:0006092 | 12 | 12 | 100   | 1.13 | 0 | 0    | 0    | 0 | 0     | 0     | 0 | 0    | 0     | 1 | 1 | 1 | 1 |
| GO:0006094 | 24 | 24 | 100   | 1.13 | 0 | 0    | 0    | 0 | 0     | 0     | 0 | 0    | 0     | 1 | 1 | 1 | 1 |
| GO:0006096 | 87 | 80 | 91.95 | 1.04 | 2 | 2.3  | 0.66 | 3 | 3.45  | 0.74  | 2 | 2.3  | 0.65  | 1 | 1 | 1 | 1 |
| GO:0006097 | 11 | 11 | 100   | 1.13 | 0 | 0    | 0    | 0 | 0     | 0     | 0 | 0    | 0     | 1 | 1 | 1 | 1 |
| GO:0006098 | 14 | 12 | 85.71 | 0.97 | 0 | 0    | 0    | 2 | 14.29 | 3.08  | 0 | 0    | 0     | 1 | 1 | 1 | 1 |

|            |     |     |       |      |    |      |       |    |      |      |    |      |             |   |   |   |
|------------|-----|-----|-------|------|----|------|-------|----|------|------|----|------|-------------|---|---|---|
| GO:0006099 | 61  | 61  | 100   | 1.13 | 0  | 0    | 0     | 0  | 0    | 0    | 0  | 0    | 0.990699217 | 1 | 1 | 1 |
| GO:0006101 | 3   | 3   | 100   | 1.13 | 0  | 0    | 0     | 0  | 0    | 0    | 0  | 0    |             | 1 | 1 | 1 |
| GO:0006104 | 5   | 5   | 100   | 1.13 | 0  | 0    | 0     | 0  | 0    | 0    | 0  | 0    |             | 1 | 1 | 1 |
| GO:0006106 | 2   | 2   | 100   | 1.13 | 0  | 0    | 0     | 0  | 0    | 0    | 0  | 0    |             | 1 | 1 | 1 |
| GO:0006108 | 5   | 5   | 100   | 1.13 | 0  | 0    | 0     | 0  | 0    | 0    | 0  | 0    |             | 1 | 1 | 1 |
| GO:0006110 | 2   | 2   | 100   | 1.13 | 0  | 0    | 0     | 0  | 0    | 0    | 0  | 0    |             | 1 | 1 | 1 |
| GO:0006112 | 3   | 3   | 100   | 1.13 | 0  | 0    | 0     | 0  | 0    | 0    | 0  | 0    |             | 1 | 1 | 1 |
| GO:0006116 | 1   | 1   | 100   | 1.13 | 0  | 0    | 0     | 0  | 0    | 0    | 0  | 0    |             | 1 | 1 | 1 |
| GO:0006118 | 663 | 602 | 90.8  | 1.03 | 10 | 1.51 | 0.43  | 26 | 3.92 | 0.84 | 25 | 3.77 | 1.06        | 1 | 1 | 1 |
| GO:0006119 | 8   | 8   | 100   | 1.13 | 0  | 0    | 0     | 0  | 0    | 0    | 0  | 0    |             | 1 | 1 | 1 |
| GO:0006120 | 27  | 24  | 88.89 | 1.01 | 1  | 3.7  | 1.06  | 1  | 3.7  | 0.8  | 1  | 3.7  | 1.05        | 1 | 1 | 1 |
| GO:0006122 | 5   | 4   | 80    | 0.91 | 1  | 20   | 5.73  | 0  | 0    | 0    | 0  | 0    | 0           | 1 | 1 | 1 |
| GO:0006125 | 3   | 3   | 100   | 1.13 | 0  | 0    | 0     | 0  | 0    | 0    | 0  | 0    | 0           | 1 | 1 | 1 |
| GO:0006127 | 2   | 1   | 50    | 0.57 | 1  | 50   | 14.32 | 0  | 0    | 0    | 0  | 0    | 0           | 1 | 1 | 1 |
| GO:0006128 | 1   | 1   | 100   | 1.13 | 0  | 0    | 0     | 0  | 0    | 0    | 0  | 0    | 0           | 1 | 1 | 1 |
| GO:0006129 | 5   | 3   | 60    | 0.68 | 0  | 0    | 0     | 2  | 40   | 8.61 | 0  | 0    | 0           | 1 | 1 | 1 |
| GO:0006134 | 2   | 2   | 100   | 1.13 | 0  | 0    | 0     | 0  | 0    | 0    | 0  | 0    | 0           | 1 | 1 | 1 |
| GO:0006139 | 58  | 57  | 98.28 | 1.11 | 0  | 0    | 0     | 1  | 1.72 | 0.37 | 0  | 0    | 0           | 1 | 1 | 1 |
| GO:0006143 | 2   | 1   | 50    | 0.57 | 0  | 0    | 0     | 0  | 0    | 0    | 1  | 50   | 14.11       | 1 | 1 | 1 |
| GO:0006144 | 8   | 7   | 87.5  | 0.99 | 0  | 0    | 0     | 0  | 0    | 0    | 1  | 12.5 | 3.53        | 1 | 1 | 1 |
| GO:0006155 | 1   | 1   | 100   | 1.13 | 0  | 0    | 0     | 0  | 0    | 0    | 0  | 0    | 0           | 1 | 1 | 1 |
| GO:0006163 | 2   | 2   | 100   | 1.13 | 0  | 0    | 0     | 0  | 0    | 0    | 0  | 0    | 0           | 1 | 1 | 1 |
| GO:0006164 | 44  | 44  | 100   | 1.13 | 0  | 0    | 0     | 0  | 0    | 0    | 0  | 0    | 0           | 1 | 1 | 1 |
| GO:0006166 | 6   | 6   | 100   | 1.13 | 0  | 0    | 0     | 0  | 0    | 0    | 0  | 0    | 0           | 1 | 1 | 1 |
| GO:0006168 | 1   | 1   | 100   | 1.13 | 0  | 0    | 0     | 0  | 0    | 0    | 0  | 0    | 0           | 1 | 1 | 1 |
| GO:0006171 | 5   | 5   | 100   | 1.13 | 0  | 0    | 0     | 0  | 0    | 0    | 0  | 0    | 0           | 1 | 1 | 1 |
| GO:0006172 | 1   | 1   | 100   | 1.13 | 0  | 0    | 0     | 0  | 0    | 0    | 0  | 0    | 0           | 1 | 1 | 1 |
| GO:0006173 | 1   | 1   | 100   | 1.13 | 0  | 0    | 0     | 0  | 0    | 0    | 0  | 0    | 0           | 1 | 1 | 1 |
| GO:0006177 | 13  | 13  | 100   | 1.13 | 0  | 0    | 0     | 0  | 0    | 0    | 0  | 0    | 0           | 1 | 1 | 1 |
| GO:0006182 | 2   | 2   | 100   | 1.13 | 0  | 0    | 0     | 0  | 0    | 0    | 0  | 0    | 0           | 1 | 1 | 1 |
| GO:0006183 | 18  | 16  | 88.89 | 1.01 | 1  | 5.56 | 1.59  | 1  | 5.56 | 1.2  | 0  | 0    | 0           | 1 | 1 | 1 |
| GO:0006189 | 13  | 13  | 100   | 1.13 | 0  | 0    | 0     | 0  | 0    | 0    | 0  | 0    | 0           | 1 | 1 | 1 |
| GO:0006203 | 1   | 1   | 100   | 1.13 | 0  | 0    | 0     | 0  | 0    | 0    | 0  | 0    | 0           | 1 | 1 | 1 |
| GO:0006205 | 2   | 2   | 100   | 1.13 | 0  | 0    | 0     | 0  | 0    | 0    | 0  | 0    | 0           | 1 | 1 | 1 |
| GO:0006207 | 11  | 11  | 100   | 1.13 | 0  | 0    | 0     | 0  | 0    | 0    | 0  | 0    | 0           | 1 | 1 | 1 |
| GO:0006208 | 1   | 1   | 100   | 1.13 | 0  | 0    | 0     | 0  | 0    | 0    | 0  | 0    | 0           | 1 | 1 | 1 |
| GO:0006213 | 2   | 2   | 100   | 1.13 | 0  | 0    | 0     | 0  | 0    | 0    | 0  | 0    | 0           | 1 | 1 | 1 |
| GO:0006220 | 1   | 1   | 100   | 1.13 | 0  | 0    | 0     | 0  | 0    | 0    | 0  | 0    | 0           | 1 | 1 | 1 |
| GO:0006221 | 8   | 8   | 100   | 1.13 | 0  | 0    | 0     | 0  | 0    | 0    | 0  | 0    | 0           | 1 | 1 | 1 |
| GO:0006224 | 3   | 3   | 100   | 1.13 | 0  | 0    | 0     | 0  | 0    | 0    | 0  | 0    | 0           | 1 | 1 | 1 |
| GO:0006228 | 16  | 14  | 87.5  | 0.99 | 1  | 6.25 | 1.79  | 1  | 6.25 | 1.35 | 0  | 0    | 0           | 1 | 1 | 1 |

|            |     |     |       |      |   |      |      |   |      |       |   |      |      |             |   |   |   |
|------------|-----|-----|-------|------|---|------|------|---|------|-------|---|------|------|-------------|---|---|---|
| GO:0006231 | 2   | 2   | 100   | 1.13 | 0 | 0    | 0    | 0 | 0    | 0     | 0 | 0    | 0    | 1           | 1 | 1 | 1 |
| GO:0006233 | 10  | 10  | 100   | 1.13 | 0 | 0    | 0    | 0 | 0    | 0     | 0 | 0    | 0    | 1           | 1 | 1 | 1 |
| GO:0006235 | 10  | 10  | 100   | 1.13 | 0 | 0    | 0    | 0 | 0    | 0     | 0 | 0    | 0    | 1           | 1 | 1 | 1 |
| GO:0006241 | 16  | 14  | 87.5  | 0.99 | 1 | 6.25 | 1.79 | 1 | 6.25 | 1.35  | 0 | 0    | 0    | 1           | 1 | 1 | 1 |
| GO:0006259 | 37  | 34  | 91.89 | 1.04 | 1 | 2.7  | 0.77 | 2 | 5.41 | 1.16  | 0 | 0    | 0    | 1           | 1 | 1 | 1 |
| GO:0006260 | 142 | 137 | 96.48 | 1.09 | 4 | 2.82 | 0.81 | 1 | 0.7  | 0.15  | 0 | 0    | 0    | 0.673267658 | 1 | 1 | 1 |
| GO:0006261 | 2   | 2   | 100   | 1.13 | 0 | 0    | 0    | 0 | 0    | 0     | 0 | 0    | 0    | 1           | 1 | 1 | 1 |
| GO:0006265 | 16  | 16  | 100   | 1.13 | 0 | 0    | 0    | 0 | 0    | 0     | 0 | 0    | 0    | 1           | 1 | 1 | 1 |
| GO:0006268 | 10  | 10  | 100   | 1.13 | 0 | 0    | 0    | 0 | 0    | 0     | 0 | 0    | 0    | 1           | 1 | 1 | 1 |
| GO:0006269 | 7   | 7   | 100   | 1.13 | 0 | 0    | 0    | 0 | 0    | 0     | 0 | 0    | 0    | 1           | 1 | 1 | 1 |
| GO:0006270 | 29  | 29  | 100   | 1.13 | 0 | 0    | 0    | 0 | 0    | 0     | 0 | 0    | 0    | 1           | 1 | 1 | 1 |
| GO:0006275 | 3   | 3   | 100   | 1.13 | 0 | 0    | 0    | 0 | 0    | 0     | 0 | 0    | 0    | 1           | 1 | 1 | 1 |
| GO:0006278 | 1   | 1   | 100   | 1.13 | 0 | 0    | 0    | 0 | 0    | 0     | 0 | 0    | 0    | 1           | 1 | 1 | 1 |
| GO:0006280 | 1   | 1   | 100   | 1.13 | 0 | 0    | 0    | 0 | 0    | 0     | 0 | 0    | 0    | 1           | 1 | 1 | 1 |
| GO:0006281 | 159 | 146 | 91.82 | 1.04 | 4 | 2.52 | 0.72 | 6 | 3.77 | 0.81  | 3 | 1.89 | 0.53 | 1           | 1 | 1 | 1 |
| GO:0006282 | 1   | 1   | 100   | 1.13 | 0 | 0    | 0    | 0 | 0    | 0     | 0 | 0    | 0    | 1           | 1 | 1 | 1 |
| GO:0006283 | 4   | 4   | 100   | 1.13 | 0 | 0    | 0    | 0 | 0    | 0     | 0 | 0    | 0    | 1           | 1 | 1 | 1 |
| GO:0006284 | 14  | 13  | 92.86 | 1.05 | 1 | 7.14 | 2.05 | 0 | 0    | 0     | 0 | 0    | 0    | 1           | 1 | 1 | 1 |
| GO:0006287 | 2   | 2   | 100   | 1.13 | 0 | 0    | 0    | 0 | 0    | 0     | 0 | 0    | 0    | 1           | 1 | 1 | 1 |
| GO:0006289 | 30  | 28  | 93.33 | 1.06 | 1 | 3.33 | 0.95 | 1 | 3.33 | 0.72  | 0 | 0    | 0    | 1           | 1 | 1 | 1 |
| GO:0006298 | 10  | 10  | 100   | 1.13 | 0 | 0    | 0    | 0 | 0    | 0     | 0 | 0    | 0    | 1           | 1 | 1 | 1 |
| GO:0006301 | 4   | 4   | 100   | 1.13 | 0 | 0    | 0    | 0 | 0    | 0     | 0 | 0    | 0    | 1           | 1 | 1 | 1 |
| GO:0006302 | 10  | 9   | 90    | 1.02 | 0 | 0    | 0    | 1 | 10   | 2.15  | 0 | 0    | 0    | 1           | 1 | 1 | 1 |
| GO:0006303 | 4   | 4   | 100   | 1.13 | 0 | 0    | 0    | 0 | 0    | 0     | 0 | 0    | 0    | 1           | 1 | 1 | 1 |
| GO:0006304 | 6   | 6   | 100   | 1.13 | 0 | 0    | 0    | 0 | 0    | 0     | 0 | 0    | 0    | 1           | 1 | 1 | 1 |
| GO:0006305 | 1   | 1   | 100   | 1.13 | 0 | 0    | 0    | 0 | 0    | 0     | 0 | 0    | 0    | 1           | 1 | 1 | 1 |
| GO:0006306 | 24  | 23  | 95.83 | 1.09 | 0 | 0    | 0    | 1 | 4.17 | 0.9   | 0 | 0    | 0    | 1           | 1 | 1 | 1 |
| GO:0006308 | 2   | 1   | 50    | 0.57 | 0 | 0    | 0    | 1 | 50   | 10.76 | 0 | 0    | 0    | 1           | 1 | 1 | 1 |
| GO:0006309 | 2   | 1   | 50    | 0.57 | 0 | 0    | 0    | 1 | 50   | 10.76 | 0 | 0    | 0    | 1           | 1 | 1 | 1 |
| GO:0006310 | 32  | 29  | 90.63 | 1.03 | 2 | 6.25 | 1.79 | 1 | 3.13 | 0.67  | 0 | 0    | 0    | 1           | 1 | 1 | 1 |
| GO:0006312 | 2   | 2   | 100   | 1.13 | 0 | 0    | 0    | 0 | 0    | 0     | 0 | 0    | 0    | 1           | 1 | 1 | 1 |
| GO:0006313 | 2   | 2   | 100   | 1.13 | 0 | 0    | 0    | 0 | 0    | 0     | 0 | 0    | 0    | 1           | 1 | 1 | 1 |
| GO:0006323 | 38  | 38  | 100   | 1.13 | 0 | 0    | 0    | 0 | 0    | 0     | 0 | 0    | 0    | 1           | 1 | 1 | 1 |
| GO:0006325 | 4   | 3   | 75    | 0.85 | 0 | 0    | 0    | 1 | 25   | 5.38  | 0 | 0    | 0    | 1           | 1 | 1 | 1 |
| GO:0006333 | 31  | 27  | 87.1  | 0.99 | 3 | 9.68 | 2.77 | 1 | 3.23 | 0.69  | 0 | 0    | 0    | 1           | 1 | 1 | 1 |
| GO:0006334 | 77  | 66  | 85.71 | 0.97 | 1 | 1.3  | 0.37 | 7 | 9.09 | 1.96  | 3 | 3.9  | 1.1  | 1           | 1 | 1 | 1 |
| GO:0006335 | 1   | 1   | 100   | 1.13 | 0 | 0    | 0    | 0 | 0    | 0     | 0 | 0    | 0    | 1           | 1 | 1 | 1 |
| GO:0006337 | 2   | 2   | 100   | 1.13 | 0 | 0    | 0    | 0 | 0    | 0     | 0 | 0    | 0    | 1           | 1 | 1 | 1 |
| GO:0006338 | 30  | 29  | 96.67 | 1.09 | 0 | 0    | 0    | 1 | 3.33 | 0.72  | 0 | 0    | 0    | 1           | 1 | 1 | 1 |
| GO:0006342 | 5   | 4   | 80    | 0.91 | 0 | 0    | 0    | 1 | 20   | 4.31  | 0 | 0    | 0    | 1           | 1 | 1 | 1 |
| GO:0006349 | 3   | 3   | 100   | 1.13 | 0 | 0    | 0    | 0 | 0    | 0     | 0 | 0    | 0    | 1           | 1 | 1 | 1 |

|            |      |      |       |      |    |       |      |    |       |       |    |      |      |   |   |   |   |
|------------|------|------|-------|------|----|-------|------|----|-------|-------|----|------|------|---|---|---|---|
| GO:0006350 | 116  | 108  | 93.1  | 1.05 | 5  | 4.31  | 1.23 | 2  | 1.72  | 0.37  | 1  | 0.86 | 0.24 | 1 | 1 | 1 | 1 |
| GO:0006351 | 8    | 7    | 87.5  | 0.99 | 0  | 0     | 0    | 0  | 0     | 0     | 1  | 12.5 | 3.53 | 1 | 1 | 1 | 1 |
| GO:0006352 | 7    | 6    | 85.71 | 0.97 | 0  | 0     | 0    | 1  | 14.29 | 3.08  | 0  | 0    | 0    | 1 | 1 | 1 | 1 |
| GO:0006353 | 1    | 1    | 100   | 1.13 | 0  | 0     | 0    | 0  | 0     | 0     | 0  | 0    | 0    | 1 | 1 | 1 | 1 |
| GO:0006354 | 10   | 10   | 100   | 1.13 | 0  | 0     | 0    | 0  | 0     | 0     | 0  | 0    | 0    | 1 | 1 | 1 | 1 |
| GO:0006355 | 1487 | 1315 | 88.43 | 1    | 60 | 4.03  | 1.16 | 74 | 4.98  | 1.07  | 38 | 2.56 | 0.72 | 1 | 1 | 1 | 1 |
| GO:0006356 | 4    | 2    | 50    | 0.57 | 0  | 0     | 0    | 2  | 50    | 10.76 | 0  | 0    | 0    | 1 | 1 | 1 | 1 |
| GO:0006357 | 114  | 101  | 88.6  | 1    | 7  | 6.14  | 1.76 | 2  | 1.75  | 0.38  | 4  | 3.51 | 0.99 | 1 | 1 | 1 | 1 |
| GO:0006359 | 11   | 9    | 81.82 | 0.93 | 1  | 9.09  | 2.6  | 1  | 9.09  | 1.96  | 0  | 0    | 0    | 1 | 1 | 1 | 1 |
| GO:0006360 | 2    | 2    | 100   | 1.13 | 0  | 0     | 0    | 0  | 0     | 0     | 0  | 0    | 0    | 1 | 1 | 1 | 1 |
| GO:0006361 | 1    | 1    | 100   | 1.13 | 0  | 0     | 0    | 0  | 0     | 0     | 0  | 0    | 0    | 1 | 1 | 1 | 1 |
| GO:0006364 | 55   | 52   | 94.55 | 1.07 | 1  | 1.82  | 0.52 | 2  | 3.64  | 0.78  | 0  | 0    | 0    | 1 | 1 | 1 | 1 |
| GO:0006365 | 8    | 8    | 100   | 1.13 | 0  | 0     | 0    | 0  | 0     | 0     | 0  | 0    | 0    | 1 | 1 | 1 | 1 |
| GO:0006366 | 80   | 71   | 88.75 | 1    | 1  | 1.25  | 0.36 | 3  | 3.75  | 0.81  | 5  | 6.25 | 1.76 | 1 | 1 | 1 | 1 |
| GO:0006367 | 20   | 19   | 95    | 1.08 | 1  | 5     | 1.43 | 0  | 0     | 0     | 0  | 0    | 0    | 1 | 1 | 1 | 1 |
| GO:0006368 | 5    | 5    | 100   | 1.13 | 0  | 0     | 0    | 0  | 0     | 0     | 0  | 0    | 0    | 1 | 1 | 1 | 1 |
| GO:0006370 | 10   | 7    | 70    | 0.79 | 3  | 30    | 8.59 | 0  | 0     | 0     | 0  | 0    | 0    | 1 | 1 | 1 | 1 |
| GO:0006371 | 114  | 110  | 96.49 | 1.09 | 0  | 0     | 0    | 3  | 2.63  | 0.57  | 1  | 0.88 | 0.25 | 1 | 1 | 1 | 1 |
| GO:0006376 | 24   | 21   | 87.5  | 0.99 | 0  | 0     | 0    | 2  | 8.33  | 1.79  | 1  | 4.17 | 1.18 | 1 | 1 | 1 | 1 |
| GO:0006378 | 13   | 12   | 92.31 | 1.05 | 1  | 7.69  | 2.2  | 0  | 0     | 0     | 0  | 0    | 0    | 1 | 1 | 1 | 1 |
| GO:0006379 | 10   | 9    | 90    | 1.02 | 1  | 10    | 2.86 | 0  | 0     | 0     | 0  | 0    | 0    | 1 | 1 | 1 | 1 |
| GO:0006381 | 7    | 6    | 85.71 | 0.97 | 1  | 14.29 | 4.09 | 0  | 0     | 0     | 0  | 0    | 0    | 1 | 1 | 1 | 1 |
| GO:0006383 | 12   | 12   | 100   | 1.13 | 0  | 0     | 0    | 0  | 0     | 0     | 0  | 0    | 0    | 1 | 1 | 1 | 1 |
| GO:0006388 | 2    | 2    | 100   | 1.13 | 0  | 0     | 0    | 0  | 0     | 0     | 0  | 0    | 0    | 1 | 1 | 1 | 1 |
| GO:0006396 | 123  | 112  | 91.06 | 1.03 | 9  | 7.32  | 2.1  | 1  | 0.81  | 0.18  | 1  | 0.81 | 0.23 | 1 | 1 | 1 | 1 |
| GO:0006397 | 125  | 116  | 92.8  | 1.05 | 2  | 1.6   | 0.46 | 5  | 4     | 0.86  | 2  | 1.6  | 0.45 | 1 | 1 | 1 | 1 |
| GO:0006399 | 12   | 11   | 91.67 | 1.04 | 1  | 8.33  | 2.39 | 0  | 0     | 0     | 0  | 0    | 0    | 1 | 1 | 1 | 1 |
| GO:0006400 | 1    | 1    | 100   | 1.13 | 0  | 0     | 0    | 0  | 0     | 0     | 0  | 0    | 0    | 1 | 1 | 1 | 1 |
| GO:0006401 | 5    | 5    | 100   | 1.13 | 0  | 0     | 0    | 0  | 0     | 0     | 0  | 0    | 0    | 1 | 1 | 1 | 1 |
| GO:0006402 | 5    | 5    | 100   | 1.13 | 0  | 0     | 0    | 0  | 0     | 0     | 0  | 0    | 0    | 1 | 1 | 1 | 1 |
| GO:0006405 | 6    | 6    | 100   | 1.13 | 0  | 0     | 0    | 0  | 0     | 0     | 0  | 0    | 0    | 1 | 1 | 1 | 1 |
| GO:0006406 | 13   | 13   | 100   | 1.13 | 0  | 0     | 0    | 0  | 0     | 0     | 0  | 0    | 0    | 1 | 1 | 1 | 1 |
| GO:0006408 | 5    | 5    | 100   | 1.13 | 0  | 0     | 0    | 0  | 0     | 0     | 0  | 0    | 0    | 1 | 1 | 1 | 1 |
| GO:0006411 | 3    | 3    | 100   | 1.13 | 0  | 0     | 0    | 0  | 0     | 0     | 0  | 0    | 0    | 1 | 1 | 1 | 1 |
| GO:0006412 | 491  | 434  | 88.39 | 1    | 17 | 3.46  | 0.99 | 33 | 6.72  | 1.45  | 7  | 1.43 | 0.4  | 1 | 1 | 1 | 1 |
| GO:0006413 | 73   | 72   | 98.63 | 1.12 | 0  | 0     | 0    | 1  | 1.37  | 0.29  | 0  | 0    | 0    | 1 | 1 | 1 | 1 |
| GO:0006414 | 49   | 49   | 100   | 1.13 | 0  | 0     | 0    | 0  | 0     | 0     | 0  | 0    | 0    | 1 | 1 | 1 | 1 |
| GO:0006415 | 10   | 8    | 80    | 0.91 | 0  | 0     | 0    | 1  | 10    | 2.15  | 1  | 10   | 2.82 | 1 | 1 | 1 | 1 |
| GO:0006417 | 36   | 36   | 100   | 1.13 | 0  | 0     | 0    | 0  | 0     | 0     | 0  | 0    | 0    | 1 | 1 | 1 | 1 |
| GO:0006418 | 139  | 126  | 90.65 | 1.03 | 6  | 4.32  | 1.24 | 5  | 3.6   | 0.77  | 2  | 1.44 | 0.41 | 1 | 1 | 1 | 1 |
| GO:0006419 | 5    | 5    | 100   | 1.13 | 0  | 0     | 0    | 0  | 0     | 0     | 0  | 0    | 0    | 1 | 1 | 1 | 1 |

|            |     |     |       |      |   |       |       |    |       |       |   |       |      |   |             |   |   |
|------------|-----|-----|-------|------|---|-------|-------|----|-------|-------|---|-------|------|---|-------------|---|---|
| GO:0006420 | 5   | 5   | 100   | 1.13 | 0 | 0     | 0     | 0  | 0     | 0     | 0 | 0     | 0    | 1 | 1           | 1 | 1 |
| GO:0006421 | 3   | 3   | 100   | 1.13 | 0 | 0     | 0     | 0  | 0     | 0     | 0 | 0     | 0    | 1 | 1           | 1 | 1 |
| GO:0006422 | 9   | 6   | 66.67 | 0.75 | 3 | 33.33 | 9.54  | 0  | 0     | 0     | 0 | 0     | 0    | 1 | 1           | 1 | 1 |
| GO:0006423 | 3   | 3   | 100   | 1.13 | 0 | 0     | 0     | 0  | 0     | 0     | 0 | 0     | 0    | 1 | 1           | 1 | 1 |
| GO:0006424 | 9   | 9   | 100   | 1.13 | 0 | 0     | 0     | 0  | 0     | 0     | 0 | 0     | 0    | 1 | 1           | 1 | 1 |
| GO:0006425 | 1   | 1   | 100   | 1.13 | 0 | 0     | 0     | 0  | 0     | 0     | 0 | 0     | 0    | 1 | 1           | 1 | 1 |
| GO:0006426 | 2   | 2   | 100   | 1.13 | 0 | 0     | 0     | 0  | 0     | 0     | 0 | 0     | 0    | 1 | 1           | 1 | 1 |
| GO:0006427 | 3   | 3   | 100   | 1.13 | 0 | 0     | 0     | 0  | 0     | 0     | 0 | 0     | 0    | 1 | 1           | 1 | 1 |
| GO:0006428 | 7   | 7   | 100   | 1.13 | 0 | 0     | 0     | 0  | 0     | 0     | 0 | 0     | 0    | 1 | 1           | 1 | 1 |
| GO:0006429 | 1   | 1   | 100   | 1.13 | 0 | 0     | 0     | 0  | 0     | 0     | 0 | 0     | 0    | 1 | 1           | 1 | 1 |
| GO:0006430 | 4   | 1   | 25    | 0.28 | 3 | 75    | 21.47 | 0  | 0     | 0     | 0 | 0     | 0    | 1 | 0.683729195 | 1 | 1 |
| GO:0006431 | 2   | 2   | 100   | 1.13 | 0 | 0     | 0     | 0  | 0     | 0     | 0 | 0     | 0    | 1 | 1           | 1 | 1 |
| GO:0006432 | 8   | 8   | 100   | 1.13 | 0 | 0     | 0     | 0  | 0     | 0     | 0 | 0     | 0    | 1 | 1           | 1 | 1 |
| GO:0006433 | 2   | 2   | 100   | 1.13 | 0 | 0     | 0     | 0  | 0     | 0     | 0 | 0     | 0    | 1 | 1           | 1 | 1 |
| GO:0006434 | 6   | 5   | 83.33 | 0.94 | 0 | 0     | 0     | 1  | 16.67 | 3.59  | 0 | 0     | 0    | 1 | 1           | 1 | 1 |
| GO:0006435 | 13  | 12  | 92.31 | 1.05 | 0 | 0     | 0     | 1  | 7.69  | 1.66  | 0 | 0     | 0    | 1 | 1           | 1 | 1 |
| GO:0006436 | 4   | 4   | 100   | 1.13 | 0 | 0     | 0     | 0  | 0     | 0     | 0 | 0     | 0    | 1 | 1           | 1 | 1 |
| GO:0006437 | 5   | 5   | 100   | 1.13 | 0 | 0     | 0     | 0  | 0     | 0     | 0 | 0     | 0    | 1 | 1           | 1 | 1 |
| GO:0006438 | 2   | 2   | 100   | 1.13 | 0 | 0     | 0     | 0  | 0     | 0     | 0 | 0     | 0    | 1 | 1           | 1 | 1 |
| GO:0006441 | 1   | 0   | 0     | 0    | 1 | 100   | 28.63 | 0  | 0     | 0     | 0 | 0     | 0    | 1 | 1           | 1 | 1 |
| GO:0006445 | 37  | 33  | 89.19 | 1.01 | 4 | 10.81 | 3.1   | 0  | 0     | 0     | 0 | 0     | 0    | 1 | 1           | 1 | 1 |
| GO:0006446 | 44  | 41  | 93.18 | 1.06 | 0 | 0     | 0     | 3  | 6.82  | 1.47  | 0 | 0     | 0    | 1 | 1           | 1 | 1 |
| GO:0006449 | 3   | 1   | 33.33 | 0.38 | 0 | 0     | 0     | 1  | 33.33 | 7.18  | 1 | 33.33 | 9.41 | 1 | 1           | 1 | 1 |
| GO:0006450 | 1   | 1   | 100   | 1.13 | 0 | 0     | 0     | 0  | 0     | 0     | 0 | 0     | 0    | 1 | 1           | 1 | 1 |
| GO:0006457 | 206 | 194 | 94.17 | 1.07 | 1 | 0.49  | 0.14  | 9  | 4.37  | 0.94  | 2 | 0.97  | 0.27 | 1 | 1           | 1 | 1 |
| GO:0006461 | 37  | 35  | 94.59 | 1.07 | 0 | 0     | 0     | 1  | 2.7   | 0.58  | 1 | 2.7   | 0.76 | 1 | 1           | 1 | 1 |
| GO:0006464 | 230 | 210 | 91.3  | 1.03 | 3 | 1.3   | 0.37  | 16 | 6.96  | 1.5   | 1 | 0.43  | 0.12 | 1 | 1           | 1 | 1 |
| GO:0006468 | 508 | 468 | 92.13 | 1.04 | 8 | 1.57  | 0.45  | 24 | 4.72  | 1.02  | 8 | 1.57  | 0.44 | 1 | 1           | 1 | 1 |
| GO:0006469 | 8   | 6   | 75    | 0.85 | 1 | 12.5  | 3.58  | 0  | 0     | 0     | 1 | 12.5  | 3.53 | 1 | 1           | 1 | 1 |
| GO:0006470 | 147 | 139 | 94.56 | 1.07 | 2 | 1.36  | 0.39  | 2  | 1.36  | 0.29  | 4 | 2.72  | 0.77 | 1 | 1           | 1 | 1 |
| GO:0006471 | 20  | 18  | 90    | 1.02 | 1 | 5     | 1.43  | 1  | 5     | 1.08  | 0 | 0     | 0    | 1 | 1           | 1 | 1 |
| GO:0006473 | 2   | 1   | 50    | 0.57 | 0 | 0     | 0     | 1  | 50    | 10.76 | 0 | 0     | 0    | 1 | 1           | 1 | 1 |
| GO:0006475 | 7   | 7   | 100   | 1.13 | 0 | 0     | 0     | 0  | 0     | 0     | 0 | 0     | 0    | 1 | 1           | 1 | 1 |
| GO:0006476 | 7   | 7   | 100   | 1.13 | 0 | 0     | 0     | 0  | 0     | 0     | 0 | 0     | 0    | 1 | 1           | 1 | 1 |
| GO:0006477 | 6   | 6   | 100   | 1.13 | 0 | 0     | 0     | 0  | 0     | 0     | 0 | 0     | 0    | 1 | 1           | 1 | 1 |
| GO:0006478 | 1   | 1   | 100   | 1.13 | 0 | 0     | 0     | 0  | 0     | 0     | 0 | 0     | 0    | 1 | 1           | 1 | 1 |
| GO:0006479 | 1   | 1   | 100   | 1.13 | 0 | 0     | 0     | 0  | 0     | 0     | 0 | 0     | 0    | 1 | 1           | 1 | 1 |
| GO:0006481 | 3   | 3   | 100   | 1.13 | 0 | 0     | 0     | 0  | 0     | 0     | 0 | 0     | 0    | 1 | 1           | 1 | 1 |
| GO:0006486 | 62  | 60  | 96.77 | 1.1  | 2 | 3.23  | 0.92  | 0  | 0     | 0     | 0 | 0     | 0    | 1 | 1           | 1 | 1 |
| GO:0006487 | 22  | 21  | 95.45 | 1.08 | 0 | 0     | 0     | 1  | 4.55  | 0.98  | 0 | 0     | 0    | 1 | 1           | 1 | 1 |
| GO:0006488 | 2   | 2   | 100   | 1.13 | 0 | 0     | 0     | 0  | 0     | 0     | 0 | 0     | 0    | 1 | 1           | 1 | 1 |

|            |     |     |       |      |    |       |      |    |       |       |    |      |       |   |   |   |            |
|------------|-----|-----|-------|------|----|-------|------|----|-------|-------|----|------|-------|---|---|---|------------|
| GO:0006491 | 4   | 4   | 100   | 1.13 | 0  | 0     | 0    | 0  | 0     | 0     | 0  | 0    | 0     | 1 | 1 | 1 | 1          |
| GO:0006493 | 9   | 8   | 88.89 | 1.01 | 1  | 11.11 | 3.18 | 0  | 0     | 0     | 0  | 0    | 0     | 1 | 1 | 1 | 1          |
| GO:0006497 | 2   | 1   | 50    | 0.57 | 0  | 0     | 0    | 1  | 50    | 10.76 | 0  | 0    | 0     | 1 | 1 | 1 | 1          |
| GO:0006499 | 24  | 23  | 95.83 | 1.09 | 1  | 4.17  | 1.19 | 0  | 0     | 0     | 0  | 0    | 0     | 1 | 1 | 1 | 1          |
| GO:0006502 | 14  | 12  | 85.71 | 0.97 | 0  | 0     | 0    | 2  | 14.29 | 3.08  | 0  | 0    | 0     | 1 | 1 | 1 | 1          |
| GO:0006506 | 4   | 4   | 100   | 1.13 | 0  | 0     | 0    | 0  | 0     | 0     | 0  | 0    | 0     | 1 | 1 | 1 | 1          |
| GO:0006507 | 1   | 1   | 100   | 1.13 | 0  | 0     | 0    | 0  | 0     | 0     | 0  | 0    | 0     | 1 | 1 | 1 | 1          |
| GO:0006508 | 562 | 485 | 86.3  | 0.98 | 23 | 4.09  | 1.17 | 33 | 5.87  | 1.26  | 21 | 3.74 | 1.05  | 1 | 1 | 1 | 1          |
| GO:0006510 | 5   | 4   | 80    | 0.91 | 0  | 0     | 0    | 1  | 20    | 4.31  | 0  | 0    | 0     | 1 | 1 | 1 | 1          |
| GO:0006511 | 201 | 183 | 91.04 | 1.03 | 6  | 2.99  | 0.85 | 11 | 5.47  | 1.18  | 1  | 0.5  | 0.14  | 1 | 1 | 1 | 1          |
| GO:0006512 | 130 | 118 | 90.77 | 1.03 | 1  | 0.77  | 0.22 | 10 | 7.69  | 1.66  | 1  | 0.77 | 0.22  | 1 | 1 | 1 | 1          |
| GO:0006513 | 3   | 3   | 100   | 1.13 | 0  | 0     | 0    | 0  | 0     | 0     | 0  | 0    | 0     | 1 | 1 | 1 | 1          |
| GO:0006514 | 13  | 13  | 100   | 1.13 | 0  | 0     | 0    | 0  | 0     | 0     | 0  | 0    | 0     | 1 | 1 | 1 | 1          |
| GO:0006515 | 4   | 4   | 100   | 1.13 | 0  | 0     | 0    | 0  | 0     | 0     | 0  | 0    | 0     | 1 | 1 | 1 | 1          |
| GO:0006516 | 9   | 9   | 100   | 1.13 | 0  | 0     | 0    | 0  | 0     | 0     | 0  | 0    | 0     | 1 | 1 | 1 | 1          |
| GO:0006518 | 2   | 2   | 100   | 1.13 | 0  | 0     | 0    | 0  | 0     | 0     | 0  | 0    | 0     | 1 | 1 | 1 | 1          |
| GO:0006520 | 68  | 64  | 94.12 | 1.07 | 1  | 1.47  | 0.42 | 2  | 2.94  | 0.63  | 1  | 1.47 | 0.42  | 1 | 1 | 1 | 1          |
| GO:0006525 | 2   | 0   | 0     | 0    | 0  | 0     | 0    | 1  | 50    | 10.76 | 1  | 50   | 14.11 | 1 | 1 | 1 | 1          |
| GO:0006526 | 2   | 1   | 50    | 0.57 | 0  | 0     | 0    | 1  | 50    | 10.76 | 0  | 0    | 0     | 1 | 1 | 1 | 1          |
| GO:0006527 | 4   | 2   | 50    | 0.57 | 0  | 0     | 0    | 1  | 25    | 5.38  | 1  | 25   | 7.06  | 1 | 1 | 1 | 1          |
| GO:0006529 | 4   | 4   | 100   | 1.13 | 0  | 0     | 0    | 0  | 0     | 0     | 0  | 0    | 0     | 1 | 1 | 1 | 1          |
| GO:0006533 | 3   | 0   | 0     | 0    | 0  | 0     | 0    | 0  | 0     | 0     | 3  | 100  | 28.22 | 1 | 1 | 1 | 0.21002992 |
| GO:0006534 | 2   | 2   | 100   | 1.13 | 0  | 0     | 0    | 0  | 0     | 0     | 0  | 0    | 0     | 1 | 1 | 1 | 1          |
| GO:0006535 | 1   | 1   | 100   | 1.13 | 0  | 0     | 0    | 0  | 0     | 0     | 0  | 0    | 0     | 1 | 1 | 1 | 1          |
| GO:0006536 | 1   | 1   | 100   | 1.13 | 0  | 0     | 0    | 0  | 0     | 0     | 0  | 0    | 0     | 1 | 1 | 1 | 1          |
| GO:0006537 | 3   | 3   | 100   | 1.13 | 0  | 0     | 0    | 0  | 0     | 0     | 0  | 0    | 0     | 1 | 1 | 1 | 1          |
| GO:0006541 | 18  | 18  | 100   | 1.13 | 0  | 0     | 0    | 0  | 0     | 0     | 0  | 0    | 0     | 1 | 1 | 1 | 1          |
| GO:0006544 | 1   | 1   | 100   | 1.13 | 0  | 0     | 0    | 0  | 0     | 0     | 0  | 0    | 0     | 1 | 1 | 1 | 1          |
| GO:0006545 | 1   | 1   | 100   | 1.13 | 0  | 0     | 0    | 0  | 0     | 0     | 0  | 0    | 0     | 1 | 1 | 1 | 1          |
| GO:0006546 | 1   | 1   | 100   | 1.13 | 0  | 0     | 0    | 0  | 0     | 0     | 0  | 0    | 0     | 1 | 1 | 1 | 1          |
| GO:0006547 | 8   | 7   | 87.5  | 0.99 | 0  | 0     | 0    | 1  | 12.5  | 2.69  | 0  | 0    | 0     | 1 | 1 | 1 | 1          |
| GO:0006548 | 5   | 5   | 100   | 1.13 | 0  | 0     | 0    | 0  | 0     | 0     | 0  | 0    | 0     | 1 | 1 | 1 | 1          |
| GO:0006552 | 1   | 1   | 100   | 1.13 | 0  | 0     | 0    | 0  | 0     | 0     | 0  | 0    | 0     | 1 | 1 | 1 | 1          |
| GO:0006555 | 10  | 9   | 90    | 1.02 | 0  | 0     | 0    | 1  | 10    | 2.15  | 0  | 0    | 0     | 1 | 1 | 1 | 1          |
| GO:0006556 | 2   | 2   | 100   | 1.13 | 0  | 0     | 0    | 0  | 0     | 0     | 0  | 0    | 0     | 1 | 1 | 1 | 1          |
| GO:0006558 | 2   | 2   | 100   | 1.13 | 0  | 0     | 0    | 0  | 0     | 0     | 0  | 0    | 0     | 1 | 1 | 1 | 1          |
| GO:0006559 | 7   | 7   | 100   | 1.13 | 0  | 0     | 0    | 0  | 0     | 0     | 0  | 0    | 0     | 1 | 1 | 1 | 1          |
| GO:0006560 | 3   | 3   | 100   | 1.13 | 0  | 0     | 0    | 0  | 0     | 0     | 0  | 0    | 0     | 1 | 1 | 1 | 1          |
| GO:0006561 | 7   | 7   | 100   | 1.13 | 0  | 0     | 0    | 0  | 0     | 0     | 0  | 0    | 0     | 1 | 1 | 1 | 1          |
| GO:0006562 | 4   | 4   | 100   | 1.13 | 0  | 0     | 0    | 0  | 0     | 0     | 0  | 0    | 0     | 1 | 1 | 1 | 1          |
| GO:0006563 | 4   | 4   | 100   | 1.13 | 0  | 0     | 0    | 0  | 0     | 0     | 0  | 0    | 0     | 1 | 1 | 1 | 1          |



|            |     |     |       |      |   |       |       |    |       |       |   |       |       |   |   |   |   |
|------------|-----|-----|-------|------|---|-------|-------|----|-------|-------|---|-------|-------|---|---|---|---|
| GO:0006564 | 18  | 17  | 94.44 | 1.07 | 0 | 0     | 0     | 1  | 5.56  | 1.2   | 0 | 0     | 0     | 1 | 1 | 1 | 1 |
| GO:0006565 | 1   | 1   | 100   | 1.13 | 0 | 0     | 0     | 0  | 0     | 0     | 0 | 0     | 0     | 1 | 1 | 1 | 1 |
| GO:0006568 | 1   | 0   | 0     | 0    | 0 | 0     | 0     | 0  | 0     | 0     | 1 | 100   | 28.22 | 1 | 1 | 1 | 1 |
| GO:0006569 | 1   | 0   | 0     | 0    | 0 | 0     | 0     | 0  | 0     | 0     | 1 | 100   | 28.22 | 1 | 1 | 1 | 1 |
| GO:0006572 | 3   | 3   | 100   | 1.13 | 0 | 0     | 0     | 0  | 0     | 0     | 0 | 0     | 0     | 1 | 1 | 1 | 1 |
| GO:0006573 | 1   | 1   | 100   | 1.13 | 0 | 0     | 0     | 0  | 0     | 0     | 0 | 0     | 0     | 1 | 1 | 1 | 1 |
| GO:0006583 | 7   | 3   | 42.86 | 0.49 | 2 | 28.57 | 8.18  | 1  | 14.29 | 3.08  | 1 | 14.29 | 4.03  | 1 | 1 | 1 | 1 |
| GO:0006584 | 5   | 3   | 60    | 0.68 | 2 | 40    | 11.45 | 0  | 0     | 0     | 0 | 0     | 0     | 1 | 1 | 1 | 1 |
| GO:0006587 | 1   | 1   | 100   | 1.13 | 0 | 0     | 0     | 0  | 0     | 0     | 0 | 0     | 0     | 1 | 1 | 1 | 1 |
| GO:0006590 | 3   | 3   | 100   | 1.13 | 0 | 0     | 0     | 0  | 0     | 0     | 0 | 0     | 0     | 1 | 1 | 1 | 1 |
| GO:0006595 | 8   | 8   | 100   | 1.13 | 0 | 0     | 0     | 0  | 0     | 0     | 0 | 0     | 0     | 1 | 1 | 1 | 1 |
| GO:0006596 | 5   | 5   | 100   | 1.13 | 0 | 0     | 0     | 0  | 0     | 0     | 0 | 0     | 0     | 1 | 1 | 1 | 1 |
| GO:0006598 | 1   | 1   | 100   | 1.13 | 0 | 0     | 0     | 0  | 0     | 0     | 0 | 0     | 0     | 1 | 1 | 1 | 1 |
| GO:0006601 | 5   | 5   | 100   | 1.13 | 0 | 0     | 0     | 0  | 0     | 0     | 0 | 0     | 0     | 1 | 1 | 1 | 1 |
| GO:0006605 | 205 | 180 | 87.8  | 0.99 | 7 | 3.41  | 0.98  | 13 | 6.34  | 1.37  | 5 | 2.44  | 0.69  | 1 | 1 | 1 | 1 |
| GO:0006606 | 31  | 29  | 93.55 | 1.06 | 0 | 0     | 0     | 2  | 6.45  | 1.39  | 0 | 0     | 0     | 1 | 1 | 1 | 1 |
| GO:0006607 | 2   | 2   | 100   | 1.13 | 0 | 0     | 0     | 0  | 0     | 0     | 0 | 0     | 0     | 1 | 1 | 1 | 1 |
| GO:0006608 | 2   | 2   | 100   | 1.13 | 0 | 0     | 0     | 0  | 0     | 0     | 0 | 0     | 0     | 1 | 1 | 1 | 1 |
| GO:0006610 | 9   | 8   | 88.89 | 1.01 | 0 | 0     | 0     | 0  | 0     | 0     | 1 | 11.11 | 3.14  | 1 | 1 | 1 | 1 |
| GO:0006611 | 8   | 8   | 100   | 1.13 | 0 | 0     | 0     | 0  | 0     | 0     | 0 | 0     | 0     | 1 | 1 | 1 | 1 |
| GO:0006613 | 18  | 17  | 94.44 | 1.07 | 1 | 5.56  | 1.59  | 0  | 0     | 0     | 0 | 0     | 0     | 1 | 1 | 1 | 1 |
| GO:0006614 | 2   | 2   | 100   | 1.13 | 0 | 0     | 0     | 0  | 0     | 0     | 0 | 0     | 0     | 1 | 1 | 1 | 1 |
| GO:0006620 | 33  | 23  | 69.7  | 0.79 | 5 | 15.15 | 4.34  | 3  | 9.09  | 1.96  | 2 | 6.06  | 1.71  | 1 | 1 | 1 | 1 |
| GO:0006622 | 1   | 1   | 100   | 1.13 | 0 | 0     | 0     | 0  | 0     | 0     | 0 | 0     | 0     | 1 | 1 | 1 | 1 |
| GO:0006624 | 6   | 6   | 100   | 1.13 | 0 | 0     | 0     | 0  | 0     | 0     | 0 | 0     | 0     | 1 | 1 | 1 | 1 |
| GO:0006625 | 2   | 2   | 100   | 1.13 | 0 | 0     | 0     | 0  | 0     | 0     | 0 | 0     | 0     | 1 | 1 | 1 | 1 |
| GO:0006626 | 2   | 1   | 50    | 0.57 | 0 | 0     | 0     | 1  | 50    | 10.76 | 0 | 0     | 0     | 1 | 1 | 1 | 1 |
| GO:0006627 | 3   | 3   | 100   | 1.13 | 0 | 0     | 0     | 0  | 0     | 0     | 0 | 0     | 0     | 1 | 1 | 1 | 1 |
| GO:0006628 | 14  | 12  | 85.71 | 0.97 | 0 | 0     | 0     | 2  | 14.29 | 3.08  | 0 | 0     | 0     | 1 | 1 | 1 | 1 |
| GO:0006629 | 115 | 98  | 85.22 | 0.96 | 4 | 3.48  | 1     | 10 | 8.7   | 1.87  | 3 | 2.61  | 0.74  | 1 | 1 | 1 | 1 |
| GO:0006630 | 11  | 7   | 63.64 | 0.72 | 0 | 0     | 0     | 2  | 18.18 | 3.91  | 2 | 18.18 | 5.13  | 1 | 1 | 1 | 1 |
| GO:0006631 | 87  | 80  | 91.95 | 1.04 | 5 | 5.75  | 1.65  | 1  | 1.15  | 0.25  | 1 | 1.15  | 0.32  | 1 | 1 | 1 | 1 |
| GO:0006633 | 38  | 34  | 89.47 | 1.01 | 1 | 2.63  | 0.75  | 2  | 5.26  | 1.13  | 1 | 2.63  | 0.74  | 1 | 1 | 1 | 1 |
| GO:0006635 | 15  | 15  | 100   | 1.13 | 0 | 0     | 0     | 0  | 0     | 0     | 0 | 0     | 0     | 1 | 1 | 1 | 1 |
| GO:0006636 | 4   | 4   | 100   | 1.13 | 0 | 0     | 0     | 0  | 0     | 0     | 0 | 0     | 0     | 1 | 1 | 1 | 1 |
| GO:0006637 | 3   | 3   | 100   | 1.13 | 0 | 0     | 0     | 0  | 0     | 0     | 0 | 0     | 0     | 1 | 1 | 1 | 1 |
| GO:0006641 | 3   | 1   | 33.33 | 0.38 | 0 | 0     | 0     | 1  | 33.33 | 7.18  | 1 | 33.33 | 9.41  | 1 | 1 | 1 | 1 |
| GO:0006643 | 18  | 17  | 94.44 | 1.07 | 0 | 0     | 0     | 1  | 5.56  | 1.2   | 0 | 0     | 0     | 1 | 1 | 1 | 1 |
| GO:0006644 | 30  | 25  | 83.33 | 0.94 | 3 | 10    | 2.86  | 1  | 3.33  | 0.72  | 1 | 3.33  | 0.94  | 1 | 1 | 1 | 1 |
| GO:0006646 | 2   | 2   | 100   | 1.13 | 0 | 0     | 0     | 0  | 0     | 0     | 0 | 0     | 0     | 1 | 1 | 1 | 1 |
| GO:0006650 | 3   | 3   | 100   | 1.13 | 0 | 0     | 0     | 0  | 0     | 0     | 0 | 0     | 0     | 1 | 1 | 1 | 1 |

|            |    |    |       |      |   |       |       |   |       |       |   |       |      |      |   |             |   |
|------------|----|----|-------|------|---|-------|-------|---|-------|-------|---|-------|------|------|---|-------------|---|
| GO:0006653 | 1  | 1  | 100   | 1.13 | 0 | 0     | 0     | 0 | 0     | 0     | 0 | 0     | 0    | 1    | 1 | 1           | 1 |
| GO:0006654 | 5  | 5  | 100   | 1.13 | 0 | 0     | 0     | 0 | 0     | 0     | 0 | 0     | 0    | 1    | 1 | 1           | 1 |
| GO:0006656 | 1  | 0  | 0     | 0    | 1 | 100   | 28.63 | 0 | 0     | 0     | 0 | 0     | 0    | 1    | 1 | 1           | 1 |
| GO:0006658 | 1  | 1  | 100   | 1.13 | 0 | 0     | 0     | 0 | 0     | 0     | 0 | 0     | 0    | 1    | 1 | 1           | 1 |
| GO:0006659 | 9  | 9  | 100   | 1.13 | 0 | 0     | 0     | 0 | 0     | 0     | 0 | 0     | 0    | 1    | 1 | 1           | 1 |
| GO:0006661 | 6  | 6  | 100   | 1.13 | 0 | 0     | 0     | 0 | 0     | 0     | 0 | 0     | 0    | 1    | 1 | 1           | 1 |
| GO:0006665 | 25 | 21 | 84    | 0.95 | 1 | 4     | 1.15  | 1 | 4     | 0.86  | 2 | 8     | 2.26 | 1    | 1 | 1           | 1 |
| GO:0006668 | 2  | 2  | 100   | 1.13 | 0 | 0     | 0     | 0 | 0     | 0     | 0 | 0     | 0    | 1    | 1 | 1           | 1 |
| GO:0006670 | 2  | 2  | 100   | 1.13 | 0 | 0     | 0     | 0 | 0     | 0     | 0 | 0     | 0    | 1    | 1 | 1           | 1 |
| GO:0006672 | 4  | 4  | 100   | 1.13 | 0 | 0     | 0     | 0 | 0     | 0     | 0 | 0     | 0    | 1    | 1 | 1           | 1 |
| GO:0006684 | 3  | 3  | 100   | 1.13 | 0 | 0     | 0     | 0 | 0     | 0     | 0 | 0     | 0    | 1    | 1 | 1           | 1 |
| GO:0006688 | 3  | 3  | 100   | 1.13 | 0 | 0     | 0     | 0 | 0     | 0     | 0 | 0     | 0    | 1    | 1 | 1           | 1 |
| GO:0006691 | 15 | 13 | 86.67 | 0.98 | 1 | 6.67  | 1.91  | 1 | 6.67  | 1.44  | 0 | 0     | 0    | 1    | 1 | 1           | 1 |
| GO:0006693 | 9  | 7  | 77.78 | 0.88 | 1 | 11.11 | 3.18  | 0 | 0     | 0     | 1 | 11.11 | 3.14 | 1    | 1 | 1           | 1 |
| GO:0006694 | 34 | 20 | 58.82 | 0.67 | 0 | 0     | 0     | 8 | 23.53 | 5.07  | 6 | 17.65 | 4.98 | 1    | 1 | 0.731242595 | 1 |
| GO:0006695 | 21 | 18 | 85.71 | 0.97 | 0 | 0     | 0     | 2 | 9.52  | 2.05  | 1 | 4.76  | 1.34 | 1    | 1 | 1           | 1 |
| GO:0006700 | 6  | 3  | 50    | 0.57 | 0 | 0     | 0     | 2 | 33.33 | 7.18  | 1 | 16.67 | 4.7  | 1    | 1 | 1           | 1 |
| GO:0006725 | 34 | 33 | 97.06 | 1.1  | 0 | 0     | 0     | 1 | 2.94  | 0.63  | 0 | 0     | 0    | 1    | 1 | 1           | 1 |
| GO:0006729 | 4  | 4  | 100   | 1.13 | 0 | 0     | 0     | 0 | 0     | 0     | 0 | 0     | 0    | 1    | 1 | 1           | 1 |
| GO:0006730 | 32 | 26 | 81.25 | 0.92 | 1 | 3.13  | 0.89  | 5 | 15.63 | 3.36  | 0 | 0     | 0    | 1    | 1 | 1           | 1 |
| GO:0006731 | 1  | 1  | 100   | 1.13 | 0 | 0     | 0     | 0 | 0     | 0     | 0 | 0     | 0    | 1    | 1 | 1           | 1 |
| GO:0006736 | 1  | 1  | 100   | 1.13 | 0 | 0     | 0     | 0 | 0     | 0     | 0 | 0     | 0    | 1    | 1 | 1           | 1 |
| GO:0006739 | 2  | 1  | 50    | 0.57 | 0 | 0     | 0     | 1 | 50    | 10.76 | 0 | 0     | 0    | 1    | 1 | 1           | 1 |
| GO:0006742 | 6  | 5  | 83.33 | 0.94 | 0 | 0     | 0     | 1 | 16.67 | 3.59  | 0 | 0     | 0    | 1    | 1 | 1           | 1 |
| GO:0006744 | 11 | 10 | 90.91 | 1.03 | 0 | 0     | 0     | 1 | 9.09  | 1.96  | 0 | 0     | 0    | 1    | 1 | 1           | 1 |
| GO:0006749 | 10 | 10 | 100   | 1.13 | 0 | 0     | 0     | 0 | 0     | 0     | 0 | 0     | 0    | 1    | 1 | 1           | 1 |
| GO:0006750 | 6  | 6  | 100   | 1.13 | 0 | 0     | 0     | 0 | 0     | 0     | 0 | 0     | 0    | 1    | 1 | 1           | 1 |
| GO:0006754 | 89 | 86 | 96.63 | 1.09 | 1 | 1.12  | 0.32  | 2 | 2.25  | 0.48  | 0 | 0     | 0    | 1    | 1 | 1           | 1 |
| GO:0006758 | 10 | 10 | 100   | 1.13 | 0 | 0     | 0     | 0 | 0     | 0     | 0 | 0     | 0    | 1    | 1 | 1           | 1 |
| GO:0006766 | 1  | 1  | 100   | 1.13 | 0 | 0     | 0     | 0 | 0     | 0     | 0 | 0     | 0    | 1    | 1 | 1           | 1 |
| GO:0006768 | 1  | 1  | 100   | 1.13 | 0 | 0     | 0     | 0 | 0     | 0     | 0 | 0     | 0    | 1    | 1 | 1           | 1 |
| GO:0006772 | 5  | 5  | 100   | 1.13 | 0 | 0     | 0     | 0 | 0     | 0     | 0 | 0     | 0    | 1    | 1 | 1           | 1 |
| GO:0006776 | 2  | 2  | 100   | 1.13 | 0 | 0     | 0     | 0 | 0     | 0     | 0 | 0     | 0    | 1    | 1 | 1           | 1 |
| GO:0006777 | 6  | 4  | 66.67 | 0.75 | 0 | 0     | 0     | 0 | 0     | 0     | 2 | 33.33 | 9.41 | 1    | 1 | 1           | 1 |
| GO:0006779 | 19 | 18 | 94.74 | 1.07 | 1 | 5.26  | 1.51  | 0 | 0     | 0     | 0 | 0     | 0    | 1    | 1 | 1           | 1 |
| GO:0006783 | 25 | 23 | 92    | 1.04 | 2 | 8     | 2.29  | 0 | 0     | 0     | 0 | 0     | 0    | 1    | 1 | 1           | 1 |
| GO:0006788 | 7  | 7  | 100   | 1.13 | 0 | 0     | 0     | 0 | 0     | 0     | 0 | 0     | 0    | 1    | 1 | 1           | 1 |
| GO:0006790 | 3  | 3  | 100   | 1.13 | 0 | 0     | 0     | 0 | 0     | 0     | 0 | 0     | 0    | 1    | 1 | 1           | 1 |
| GO:0006796 | 12 | 10 | 83.33 | 0.94 | 1 | 8.33  | 2.39  | 0 | 0     | 0     | 0 | 1     | 8.33 | 2.35 | 1 | 1           | 1 |
| GO:0006800 | 4  | 4  | 100   | 1.13 | 0 | 0     | 0     | 0 | 0     | 0     | 0 | 0     | 0    | 1    | 1 | 1           | 1 |
| GO:0006801 | 12 | 12 | 100   | 1.13 | 0 | 0     | 0     | 0 | 0     | 0     | 0 | 0     | 0    | 1    | 1 | 1           | 1 |

|            |     |     |       |      |    |       |      |    |       |      |    |       |      |          |   |   |             |
|------------|-----|-----|-------|------|----|-------|------|----|-------|------|----|-------|------|----------|---|---|-------------|
| GO:0006802 | 2   | 2   | 100   | 1.13 | 0  | 0     | 0    | 0  | 0     | 0    | 0  | 0     | 1    | 1        | 1 | 1 |             |
| GO:0006803 | 11  | 9   | 81.82 | 0.93 | 0  | 0     | 0    | 1  | 9.09  | 1.96 | 1  | 9.09  | 2.57 | 1        | 1 | 1 | 1           |
| GO:0006804 | 23  | 20  | 86.96 | 0.98 | 2  | 8.7   | 2.49 | 1  | 4.35  | 0.94 | 0  | 0     | 0    | 1        | 1 | 1 | 1           |
| GO:0006805 | 25  | 14  | 56    | 0.63 | 1  | 4     | 1.15 | 3  | 12    | 2.58 | 7  | 28    | 7.9  | 1        | 1 | 1 | 0.124582103 |
| GO:0006807 | 13  | 10  | 76.92 | 0.87 | 0  | 0     | 0    | 2  | 15.38 | 3.31 | 1  | 7.69  | 2.17 | 1        | 1 | 1 | 1           |
| GO:0006809 | 5   | 5   | 100   | 1.13 | 0  | 0     | 0    | 0  | 0     | 0    | 0  | 0     | 0    | 1        | 1 | 1 | 1           |
| GO:0006810 | 794 | 722 | 90.93 | 1.03 | 20 | 2.52  | 0.72 | 29 | 3.65  | 0.79 | 23 | 2.9   | 0.82 | 1        | 1 | 1 | 1           |
| GO:0006811 | 128 | 116 | 90.63 | 1.03 | 7  | 5.47  | 1.57 | 2  | 1.56  | 0.34 | 3  | 2.34  | 0.66 | 1        | 1 | 1 | 1           |
| GO:0006812 | 78  | 75  | 96.15 | 1.09 | 0  | 0     | 0    | 0  | 0     | 0    | 3  | 3.85  | 1.09 | 1        | 1 | 1 | 1           |
| GO:0006813 | 105 | 100 | 95.24 | 1.08 | 2  | 1.9   | 0.55 | 2  | 1.9   | 0.41 | 1  | 0.95  | 0.27 | 1        | 1 | 1 | 1           |
| GO:0006814 | 53  | 44  | 83.02 | 0.94 | 2  | 3.77  | 1.08 | 2  | 3.77  | 0.81 | 5  | 9.43  | 2.66 | 1        | 1 | 1 | 1           |
| GO:0006816 | 35  | 31  | 88.57 | 1    | 3  | 8.57  | 2.45 | 0  | 0     | 0    | 1  | 2.86  | 0.81 | 1        | 1 | 1 | 1           |
| GO:0006817 | 4   | 3   | 75    | 0.85 | 0  | 0     | 0    | 1  | 25    | 5.38 | 0  | 0     | 0    | 1        | 1 | 1 | 1           |
| GO:0006818 | 35  | 33  | 94.29 | 1.07 | 0  | 0     | 0    | 2  | 5.71  | 1.23 | 0  | 0     | 0    | 1        | 1 | 1 | 1           |
| GO:0006820 | 33  | 32  | 96.97 | 1.1  | 0  | 0     | 0    | 1  | 3.03  | 0.65 | 0  | 0     | 0    | 1        | 1 | 1 | 1           |
| GO:0006821 | 49  | 41  | 83.67 | 0.95 | 4  | 8.16  | 2.34 | 2  | 4.08  | 0.88 | 2  | 4.08  | 1.15 | 1        | 1 | 1 | 1           |
| GO:0006823 | 9   | 8   | 88.89 | 1.01 | 1  | 11.11 | 3.18 | 0  | 0     | 0    | 0  | 0     | 0    | 1        | 1 | 1 | 1           |
| GO:0006824 | 5   | 5   | 100   | 1.13 | 0  | 0     | 0    | 0  | 0     | 0    | 0  | 0     | 0    | 1        | 1 | 1 | 1           |
| GO:0006825 | 9   | 9   | 100   | 1.13 | 0  | 0     | 0    | 0  | 0     | 0    | 0  | 0     | 0    | 1        | 1 | 1 | 1           |
| GO:0006826 | 22  | 19  | 86.36 | 0.98 | 0  | 0     | 0    | 2  | 9.09  | 1.96 | 1  | 4.55  | 1.28 | 1        | 1 | 1 | 1           |
| GO:0006829 | 10  | 10  | 100   | 1.13 | 0  | 0     | 0    | 0  | 0     | 0    | 0  | 0     | 0    | 1        | 1 | 1 | 1           |
| GO:0006832 | 68  | 55  | 80.88 | 0.92 | 6  | 8.82  | 2.53 | 5  | 7.35  | 1.58 | 2  | 2.94  | 0.83 | 1        | 1 | 1 | 1           |
| GO:0006833 | 6   | 4   | 66.67 | 0.75 | 1  | 16.67 | 4.77 | 0  | 0     | 0    | 1  | 16.67 | 4.7  | 1        | 1 | 1 | 1           |
| GO:0006835 | 13  | 12  | 92.31 | 1.05 | 0  | 0     | 0    | 1  | 7.69  | 1.66 | 0  | 0     | 0    | 1        | 1 | 1 | 1           |
| GO:0006836 | 25  | 23  | 92    | 1.04 | 2  | 8     | 2.29 | 0  | 0     | 0    | 0  | 0     | 0    | 1        | 1 | 1 | 1           |
| GO:0006839 | 20  | 19  | 95    | 1.08 | 0  | 0     | 0    | 1  | 5     | 1.08 | 0  | 0     | 0    | 1        | 1 | 1 | 1           |
| GO:0006843 | 1   | 1   | 100   | 1.13 | 0  | 0     | 0    | 0  | 0     | 0    | 0  | 0     | 0    | 1        | 1 | 1 | 1           |
| GO:0006844 | 1   | 1   | 100   | 1.13 | 0  | 0     | 0    | 0  | 0     | 0    | 0  | 0     | 0    | 1        | 1 | 1 | 1           |
| GO:0006854 | 7   | 7   | 100   | 1.13 | 0  | 0     | 0    | 0  | 0     | 0    | 0  | 0     | 0    | 1        | 1 | 1 | 1           |
| GO:0006855 | 1   | 1   | 100   | 1.13 | 0  | 0     | 0    | 0  | 0     | 0    | 0  | 0     | 0    | 1        | 1 | 1 | 1           |
| GO:0006857 | 12  | 10  | 83.33 | 0.94 | 1  | 8.33  | 2.39 | 1  | 8.33  | 1.79 | 0  | 0     | 0    | 1        | 1 | 1 | 1           |
| GO:0006865 | 44  | 41  | 93.18 | 1.06 | 0  | 0     | 0    | 2  | 4.55  | 0.98 | 1  | 2.27  | 0.64 | 1        | 1 | 1 | 1           |
| GO:0006868 | 1   | 1   | 100   | 1.13 | 0  | 0     | 0    | 0  | 0     | 0    | 0  | 0     | 0    | 1        | 1 | 1 | 1           |
| GO:0006869 | 40  | 34  | 85    | 0.96 | 0  | 0     | 0    | 6  | 15    | 3.23 | 0  | 0     | 0    | 1        | 1 | 1 | 1           |
| GO:0006874 | 13  | 12  | 92.31 | 1.05 | 0  | 0     | 0    | 1  | 7.69  | 1.66 | 0  | 0     | 0    | 1        | 1 | 1 | 1           |
| GO:0006878 | 8   | 8   | 100   | 1.13 | 0  | 0     | 0    | 0  | 0     | 0    | 0  | 0     | 0    | 1        | 1 | 1 | 1           |
| GO:0006879 | 21  | 18  | 85.71 | 0.97 | 0  | 0     | 0    | 2  | 9.52  | 2.05 | 1  | 4.76  | 1.34 | 1        | 1 | 1 | 1           |
| GO:0006882 | 2   | 2   | 100   | 1.13 | 0  | 0     | 0    | 0  | 0     | 0    | 0  | 0     | 0    | 1        | 1 | 1 | 1           |
| GO:0006884 | 8   | 8   | 100   | 1.13 | 0  | 0     | 0    | 0  | 0     | 0    | 0  | 0     | 0    | 1        | 1 | 1 | 1           |
| GO:0006885 | 11  | 9   | 81.82 | 0.93 | 0  | 0     | 0    | 0  | 0     | 0    | 2  | 18.18 | 5.13 | 1        | 1 | 1 | 1           |
| GO:0006886 | 583 | 565 | 96.91 | 1.1  | 6  | 1.03  | 0.29 | 10 | 1.72  | 0.37 | 2  | 0.34  | 0.1  | 1.77E-12 | 1 | 1 | 1           |



|            |     |     |       |      |    |       |      |    |       |       |    |       |       |   |   |          |             |
|------------|-----|-----|-------|------|----|-------|------|----|-------|-------|----|-------|-------|---|---|----------|-------------|
| GO:0006953 | 13  | 8   | 61.54 | 0.7  | 1  | 7.69  | 2.2  | 3  | 23.08 | 4.97  | 1  | 7.69  | 2.17  | 1 | 1 | 1        | 1           |
| GO:0006954 | 105 | 77  | 73.33 | 0.83 | 4  | 3.81  | 1.09 | 13 | 12.38 | 2.67  | 11 | 10.48 | 2.96  | 1 | 1 | 1        | 1           |
| GO:0006955 | 253 | 152 | 60.08 | 0.68 | 14 | 5.53  | 1.58 | 57 | 22.53 | 4.85  | 30 | 11.86 | 3.35  | 1 | 1 | 1.33E-18 | 0.000260026 |
| GO:0006956 | 17  | 11  | 64.71 | 0.73 | 3  | 17.65 | 5.05 | 0  | 0     | 0     | 3  | 17.65 | 4.98  | 1 | 1 | 1        | 1           |
| GO:0006957 | 15  | 9   | 60    | 0.68 | 0  | 0     | 0    | 0  | 0     | 0     | 6  | 40    | 11.29 | 1 | 1 | 1        | 0.04573977  |
| GO:0006958 | 21  | 14  | 66.67 | 0.75 | 0  | 0     | 0    | 0  | 0     | 0     | 7  | 33.33 | 9.41  | 1 | 1 | 1        | 0.034565048 |
| GO:0006959 | 14  | 8   | 57.14 | 0.65 | 1  | 7.14  | 2.05 | 2  | 14.29 | 3.08  | 3  | 21.43 | 6.05  | 1 | 1 | 1        | 1           |
| GO:0006960 | 14  | 10  | 71.43 | 0.81 | 0  | 0     | 0    | 3  | 21.43 | 4.61  | 1  | 7.14  | 2.02  | 1 | 1 | 1        | 1           |
| GO:0006961 | 2   | 1   | 50    | 0.57 | 0  | 0     | 0    | 1  | 50    | 10.76 | 0  | 0     | 0     | 1 | 1 | 1        | 1           |
| GO:0006968 | 18  | 14  | 77.78 | 0.88 | 0  | 0     | 0    | 2  | 11.11 | 2.39  | 2  | 11.11 | 3.14  | 1 | 1 | 1        | 1           |
| GO:0006970 | 2   | 2   | 100   | 1.13 | 0  | 0     | 0    | 0  | 0     | 0     | 0  | 0     | 0     | 1 | 1 | 1        | 1           |
| GO:0006972 | 6   | 5   | 83.33 | 0.94 | 0  | 0     | 0    | 1  | 16.67 | 3.59  | 0  | 0     | 0     | 1 | 1 | 1        | 1           |
| GO:0006974 | 20  | 20  | 100   | 1.13 | 0  | 0     | 0    | 0  | 0     | 0     | 0  | 0     | 0     | 1 | 1 | 1        | 1           |
| GO:0006976 | 2   | 2   | 100   | 1.13 | 0  | 0     | 0    | 0  | 0     | 0     | 0  | 0     | 0     | 1 | 1 | 1        | 1           |
| GO:0006979 | 63  | 59  | 93.65 | 1.06 | 1  | 1.59  | 0.45 | 3  | 4.76  | 1.03  | 0  | 0     | 0     | 1 | 1 | 1        | 1           |
| GO:0006983 | 6   | 6   | 100   | 1.13 | 0  | 0     | 0    | 0  | 0     | 0     | 0  | 0     | 0     | 1 | 1 | 1        | 1           |
| GO:0006986 | 7   | 7   | 100   | 1.13 | 0  | 0     | 0    | 0  | 0     | 0     | 0  | 0     | 0     | 1 | 1 | 1        | 1           |
| GO:0006990 | 2   | 2   | 100   | 1.13 | 0  | 0     | 0    | 0  | 0     | 0     | 0  | 0     | 0     | 1 | 1 | 1        | 1           |
| GO:0006991 | 3   | 3   | 100   | 1.13 | 0  | 0     | 0    | 0  | 0     | 0     | 0  | 0     | 0     | 1 | 1 | 1        | 1           |
| GO:0006996 | 6   | 6   | 100   | 1.13 | 0  | 0     | 0    | 0  | 0     | 0     | 0  | 0     | 0     | 1 | 1 | 1        | 1           |
| GO:0006998 | 1   | 1   | 100   | 1.13 | 0  | 0     | 0    | 0  | 0     | 0     | 0  | 0     | 0     | 1 | 1 | 1        | 1           |
| GO:0007000 | 2   | 2   | 100   | 1.13 | 0  | 0     | 0    | 0  | 0     | 0     | 0  | 0     | 0     | 1 | 1 | 1        | 1           |
| GO:0007001 | 85  | 73  | 85.88 | 0.97 | 1  | 1.18  | 0.34 | 8  | 9.41  | 2.03  | 3  | 3.53  | 1     | 1 | 1 | 1        | 1           |
| GO:0007004 | 8   | 8   | 100   | 1.13 | 0  | 0     | 0    | 0  | 0     | 0     | 0  | 0     | 0     | 1 | 1 | 1        | 1           |
| GO:0007005 | 2   | 2   | 100   | 1.13 | 0  | 0     | 0    | 0  | 0     | 0     | 0  | 0     | 0     | 1 | 1 | 1        | 1           |
| GO:0007006 | 1   | 1   | 100   | 1.13 | 0  | 0     | 0    | 0  | 0     | 0     | 0  | 0     | 0     | 1 | 1 | 1        | 1           |
| GO:0007010 | 97  | 89  | 91.75 | 1.04 | 1  | 1.03  | 0.3  | 6  | 6.19  | 1.33  | 1  | 1.03  | 0.29  | 1 | 1 | 1        | 1           |
| GO:0007011 | 2   | 2   | 100   | 1.13 | 0  | 0     | 0    | 0  | 0     | 0     | 0  | 0     | 0     | 1 | 1 | 1        | 1           |
| GO:0007012 | 17  | 17  | 100   | 1.13 | 0  | 0     | 0    | 0  | 0     | 0     | 0  | 0     | 0     | 1 | 1 | 1        | 1           |
| GO:0007015 | 12  | 11  | 91.67 | 1.04 | 0  | 0     | 0    | 0  | 0     | 0     | 1  | 8.33  | 2.35  | 1 | 1 | 1        | 1           |
| GO:0007016 | 1   | 1   | 100   | 1.13 | 0  | 0     | 0    | 0  | 0     | 0     | 0  | 0     | 0     | 1 | 1 | 1        | 1           |
| GO:0007017 | 104 | 97  | 93.27 | 1.06 | 4  | 3.85  | 1.1  | 3  | 2.88  | 0.62  | 0  | 0     | 0     | 1 | 1 | 1        | 1           |
| GO:0007018 | 37  | 32  | 86.49 | 0.98 | 1  | 2.7   | 0.77 | 1  | 2.7   | 0.58  | 3  | 8.11  | 2.29  | 1 | 1 | 1        | 1           |
| GO:0007019 | 1   | 1   | 100   | 1.13 | 0  | 0     | 0    | 0  | 0     | 0     | 0  | 0     | 0     | 1 | 1 | 1        | 1           |
| GO:0007020 | 6   | 6   | 100   | 1.13 | 0  | 0     | 0    | 0  | 0     | 0     | 0  | 0     | 0     | 1 | 1 | 1        | 1           |
| GO:0007021 | 1   | 1   | 100   | 1.13 | 0  | 0     | 0    | 0  | 0     | 0     | 0  | 0     | 0     | 1 | 1 | 1        | 1           |
| GO:0007022 | 3   | 3   | 100   | 1.13 | 0  | 0     | 0    | 0  | 0     | 0     | 0  | 0     | 0     | 1 | 1 | 1        | 1           |
| GO:0007023 | 1   | 1   | 100   | 1.13 | 0  | 0     | 0    | 0  | 0     | 0     | 0  | 0     | 0     | 1 | 1 | 1        | 1           |
| GO:0007024 | 1   | 1   | 100   | 1.13 | 0  | 0     | 0    | 0  | 0     | 0     | 0  | 0     | 0     | 1 | 1 | 1        | 1           |
| GO:0007025 | 8   | 8   | 100   | 1.13 | 0  | 0     | 0    | 0  | 0     | 0     | 0  | 0     | 0     | 1 | 1 | 1        | 1           |
| GO:0007026 | 6   | 5   | 83.33 | 0.94 | 0  | 0     | 0    | 0  | 0     | 0     | 1  | 16.67 | 4.7   | 1 | 1 | 1        | 1           |

|            |     |     |       |      |    |       |       |    |       |       |    |       |       |             |   |   |             |
|------------|-----|-----|-------|------|----|-------|-------|----|-------|-------|----|-------|-------|-------------|---|---|-------------|
| GO:0007028 | 2   | 2   | 100   | 1.13 | 0  | 0     | 0     | 0  | 0     | 0     | 0  | 0     | 0     | 1           | 1 | 1 | 1           |
| GO:0007030 | 6   | 4   | 66.67 | 0.75 | 1  | 16.67 | 4.77  | 1  | 16.67 | 3.59  | 0  | 0     | 0     | 1           | 1 | 1 | 1           |
| GO:0007031 | 20  | 20  | 100   | 1.13 | 0  | 0     | 0     | 0  | 0     | 0     | 0  | 0     | 0     | 1           | 1 | 1 | 1           |
| GO:0007032 | 3   | 3   | 100   | 1.13 | 0  | 0     | 0     | 0  | 0     | 0     | 0  | 0     | 0     | 1           | 1 | 1 | 1           |
| GO:0007035 | 4   | 2   | 50    | 0.57 | 0  | 0     | 0     | 2  | 50    | 10.76 | 0  | 0     | 0     | 1           | 1 | 1 | 1           |
| GO:0007039 | 1   | 0   | 0     | 0    | 0  | 0     | 0     | 1  | 100   | 21.53 | 0  | 0     | 0     | 1           | 1 | 1 | 1           |
| GO:0007040 | 3   | 0   | 0     | 0    | 1  | 33.33 | 9.54  | 0  | 0     | 0     | 2  | 66.67 | 18.82 | 1           | 1 | 1 | 1           |
| GO:0007042 | 4   | 2   | 50    | 0.57 | 0  | 0     | 0     | 2  | 50    | 10.76 | 0  | 0     | 0     | 1           | 1 | 1 | 1           |
| GO:0007044 | 7   | 7   | 100   | 1.13 | 0  | 0     | 0     | 0  | 0     | 0     | 0  | 0     | 0     | 1           | 1 | 1 | 1           |
| GO:0007046 | 72  | 62  | 86.11 | 0.98 | 3  | 4.17  | 1.19  | 7  | 9.72  | 2.09  | 0  | 0     | 0     | 1           | 1 | 1 | 1           |
| GO:0007048 | 70  | 63  | 90    | 1.02 | 6  | 8.57  | 2.45  | 1  | 1.43  | 0.31  | 0  | 0     | 0     | 1           | 1 | 1 | 1           |
| GO:0007049 | 312 | 298 | 95.51 | 1.08 | 5  | 1.6   | 0.46  | 7  | 2.24  | 0.48  | 2  | 0.64  | 0.18  | 0.003663386 | 1 | 1 | 1           |
| GO:0007050 | 39  | 39  | 100   | 1.13 | 0  | 0     | 0     | 0  | 0     | 0     | 0  | 0     | 0     | 1           | 1 | 1 | 1           |
| GO:0007051 | 4   | 4   | 100   | 1.13 | 0  | 0     | 0     | 0  | 0     | 0     | 0  | 0     | 0     | 1           | 1 | 1 | 1           |
| GO:0007052 | 2   | 2   | 100   | 1.13 | 0  | 0     | 0     | 0  | 0     | 0     | 0  | 0     | 0     | 1           | 1 | 1 | 1           |
| GO:0007059 | 24  | 23  | 95.83 | 1.09 | 0  | 0     | 0     | 1  | 4.17  | 0.9   | 0  | 0     | 0     | 1           | 1 | 1 | 1           |
| GO:0007060 | 1   | 1   | 100   | 1.13 | 0  | 0     | 0     | 0  | 0     | 0     | 0  | 0     | 0     | 1           | 1 | 1 | 1           |
| GO:0007067 | 124 | 119 | 95.97 | 1.09 | 0  | 0     | 0     | 4  | 3.23  | 0.69  | 1  | 0.81  | 0.23  | 1           | 1 | 1 | 1           |
| GO:0007076 | 10  | 9   | 90    | 1.02 | 0  | 0     | 0     | 1  | 10    | 2.15  | 0  | 0     | 0     | 1           | 1 | 1 | 1           |
| GO:0007088 | 6   | 6   | 100   | 1.13 | 0  | 0     | 0     | 0  | 0     | 0     | 0  | 0     | 0     | 1           | 1 | 1 | 1           |
| GO:0007089 | 5   | 5   | 100   | 1.13 | 0  | 0     | 0     | 0  | 0     | 0     | 0  | 0     | 0     | 1           | 1 | 1 | 1           |
| GO:0007090 | 1   | 1   | 100   | 1.13 | 0  | 0     | 0     | 0  | 0     | 0     | 0  | 0     | 0     | 1           | 1 | 1 | 1           |
| GO:0007091 | 1   | 1   | 100   | 1.13 | 0  | 0     | 0     | 0  | 0     | 0     | 0  | 0     | 0     | 1           | 1 | 1 | 1           |
| GO:0007094 | 6   | 6   | 100   | 1.13 | 0  | 0     | 0     | 0  | 0     | 0     | 0  | 0     | 0     | 1           | 1 | 1 | 1           |
| GO:0007095 | 1   | 1   | 100   | 1.13 | 0  | 0     | 0     | 0  | 0     | 0     | 0  | 0     | 0     | 1           | 1 | 1 | 1           |
| GO:0007096 | 2   | 1   | 50    | 0.57 | 1  | 50    | 14.32 | 0  | 0     | 0     | 0  | 0     | 0     | 1           | 1 | 1 | 1           |
| GO:0007098 | 1   | 1   | 100   | 1.13 | 0  | 0     | 0     | 0  | 0     | 0     | 0  | 0     | 0     | 1           | 1 | 1 | 1           |
| GO:0007100 | 1   | 1   | 100   | 1.13 | 0  | 0     | 0     | 0  | 0     | 0     | 0  | 0     | 0     | 1           | 1 | 1 | 1           |
| GO:0007113 | 4   | 4   | 100   | 1.13 | 0  | 0     | 0     | 0  | 0     | 0     | 0  | 0     | 0     | 1           | 1 | 1 | 1           |
| GO:0007125 | 5   | 5   | 100   | 1.13 | 0  | 0     | 0     | 0  | 0     | 0     | 0  | 0     | 0     | 1           | 1 | 1 | 1           |
| GO:0007126 | 31  | 29  | 93.55 | 1.06 | 0  | 0     | 0     | 2  | 6.45  | 1.39  | 0  | 0     | 0     | 1           | 1 | 1 | 1           |
| GO:0007127 | 1   | 1   | 100   | 1.13 | 0  | 0     | 0     | 0  | 0     | 0     | 0  | 0     | 0     | 1           | 1 | 1 | 1           |
| GO:0007129 | 1   | 1   | 100   | 1.13 | 0  | 0     | 0     | 0  | 0     | 0     | 0  | 0     | 0     | 1           | 1 | 1 | 1           |
| GO:0007130 | 3   | 3   | 100   | 1.13 | 0  | 0     | 0     | 0  | 0     | 0     | 0  | 0     | 0     | 1           | 1 | 1 | 1           |
| GO:0007131 | 2   | 2   | 100   | 1.13 | 0  | 0     | 0     | 0  | 0     | 0     | 0  | 0     | 0     | 1           | 1 | 1 | 1           |
| GO:0007143 | 11  | 11  | 100   | 1.13 | 0  | 0     | 0     | 0  | 0     | 0     | 0  | 0     | 0     | 1           | 1 | 1 | 1           |
| GO:0007145 | 4   | 4   | 100   | 1.13 | 0  | 0     | 0     | 0  | 0     | 0     | 0  | 0     | 0     | 1           | 1 | 1 | 1           |
| GO:0007148 | 41  | 36  | 87.8  | 0.99 | 2  | 4.88  | 1.4   | 0  | 0     | 0     | 3  | 7.32  | 2.07  | 1           | 1 | 1 | 1           |
| GO:0007154 | 17  | 13  | 76.47 | 0.87 | 2  | 11.76 | 3.37  | 0  | 0     | 0     | 2  | 11.76 | 3.32  | 1           | 1 | 1 | 1           |
| GO:0007155 | 412 | 326 | 79.13 | 0.9  | 22 | 5.34  | 1.53  | 36 | 8.74  | 1.88  | 28 | 6.8   | 1.92  | 1           | 1 | 1 | 1           |
| GO:0007156 | 45  | 27  | 60    | 0.68 | 4  | 8.89  | 2.55  | 2  | 4.44  | 0.96  | 12 | 26.67 | 7.53  | 1           | 1 | 1 | 0.000367938 |

|            |     |     |       |      |    |       |       |    |       |      |    |       |       |   |   |             |             |
|------------|-----|-----|-------|------|----|-------|-------|----|-------|------|----|-------|-------|---|---|-------------|-------------|
| GO:0007157 | 55  | 42  | 76.36 | 0.86 | 1  | 1.82  | 0.52  | 6  | 10.91 | 2.35 | 6  | 10.91 | 3.08  | 1 | 1 | 1           | 1           |
| GO:0007160 | 72  | 58  | 80.56 | 0.91 | 3  | 4.17  | 1.19  | 5  | 6.94  | 1.49 | 6  | 8.33  | 2.35  | 1 | 1 | 1           | 1           |
| GO:0007162 | 4   | 4   | 100   | 1.13 | 0  | 0     | 0     | 0  | 0     | 0    | 0  | 0     | 0     | 1 | 1 | 1           | 1           |
| GO:0007163 | 4   | 4   | 100   | 1.13 | 0  | 0     | 0     | 0  | 0     | 0    | 0  | 0     | 0     | 1 | 1 | 1           | 1           |
| GO:0007164 | 2   | 2   | 100   | 1.13 | 0  | 0     | 0     | 0  | 0     | 0    | 0  | 0     | 0     | 1 | 1 | 1           | 1           |
| GO:0007165 | 544 | 482 | 88.6  | 1    | 16 | 2.94  | 0.84  | 27 | 4.96  | 1.07 | 19 | 3.49  | 0.99  | 1 | 1 | 1           | 1           |
| GO:0007166 | 90  | 55  | 61.11 | 0.69 | 8  | 8.89  | 2.55  | 14 | 15.56 | 3.35 | 13 | 14.44 | 4.08  | 1 | 1 | 0.483553535 | 0.164358293 |
| GO:0007167 | 3   | 0   | 0     | 0    | 0  | 0     | 0     | 1  | 33.33 | 7.18 | 2  | 66.67 | 18.82 | 1 | 1 | 1           | 1           |
| GO:0007168 | 3   | 2   | 66.67 | 0.75 | 0  | 0     | 0     | 1  | 33.33 | 7.18 | 0  | 0     | 0     | 1 | 1 | 1           | 1           |
| GO:0007169 | 72  | 51  | 70.83 | 0.8  | 1  | 1.39  | 0.4   | 15 | 20.83 | 4.48 | 5  | 6.94  | 1.96  | 1 | 1 | 0.007252094 | 1           |
| GO:0007170 | 3   | 3   | 100   | 1.13 | 0  | 0     | 0     | 0  | 0     | 0    | 0  | 0     | 0     | 1 | 1 | 1           | 1           |
| GO:0007171 | 1   | 0   | 0     | 0    | 1  | 100   | 28.63 | 0  | 0     | 0    | 0  | 0     | 0     | 1 | 1 | 1           | 1           |
| GO:0007173 | 6   | 4   | 66.67 | 0.75 | 1  | 16.67 | 4.77  | 0  | 0     | 0    | 1  | 16.67 | 4.7   | 1 | 1 | 1           | 1           |
| GO:0007176 | 7   | 7   | 100   | 1.13 | 0  | 0     | 0     | 0  | 0     | 0    | 0  | 0     | 0     | 1 | 1 | 1           | 1           |
| GO:0007177 | 2   | 2   | 100   | 1.13 | 0  | 0     | 0     | 0  | 0     | 0    | 0  | 0     | 0     | 1 | 1 | 1           | 1           |
| GO:0007178 | 16  | 16  | 100   | 1.13 | 0  | 0     | 0     | 0  | 0     | 0    | 0  | 0     | 0     | 1 | 1 | 1           | 1           |
| GO:0007179 | 23  | 21  | 91.3  | 1.03 | 0  | 0     | 0     | 1  | 4.35  | 0.94 | 1  | 4.35  | 1.23  | 1 | 1 | 1           | 1           |
| GO:0007181 | 1   | 1   | 100   | 1.13 | 0  | 0     | 0     | 0  | 0     | 0    | 0  | 0     | 0     | 1 | 1 | 1           | 1           |
| GO:0007182 | 7   | 7   | 100   | 1.13 | 0  | 0     | 0     | 0  | 0     | 0    | 0  | 0     | 0     | 1 | 1 | 1           | 1           |
| GO:0007183 | 5   | 5   | 100   | 1.13 | 0  | 0     | 0     | 0  | 0     | 0    | 0  | 0     | 0     | 1 | 1 | 1           | 1           |
| GO:0007184 | 2   | 2   | 100   | 1.13 | 0  | 0     | 0     | 0  | 0     | 0    | 0  | 0     | 0     | 1 | 1 | 1           | 1           |
| GO:0007185 | 22  | 19  | 86.36 | 0.98 | 1  | 4.55  | 1.3   | 0  | 0     | 0    | 2  | 9.09  | 2.57  | 1 | 1 | 1           | 1           |
| GO:0007186 | 264 | 205 | 77.65 | 0.88 | 16 | 6.06  | 1.74  | 21 | 7.95  | 1.71 | 22 | 8.33  | 2.35  | 1 | 1 | 1           | 1           |
| GO:0007187 | 2   | 2   | 100   | 1.13 | 0  | 0     | 0     | 0  | 0     | 0    | 0  | 0     | 0     | 1 | 1 | 1           | 1           |
| GO:0007188 | 4   | 3   | 75    | 0.85 | 0  | 0     | 0     | 0  | 0     | 0    | 1  | 25    | 7.06  | 1 | 1 | 1           | 1           |
| GO:0007189 | 8   | 8   | 100   | 1.13 | 0  | 0     | 0     | 0  | 0     | 0    | 0  | 0     | 0     | 1 | 1 | 1           | 1           |
| GO:0007190 | 12  | 12  | 100   | 1.13 | 0  | 0     | 0     | 0  | 0     | 0    | 0  | 0     | 0     | 1 | 1 | 1           | 1           |
| GO:0007193 | 10  | 10  | 100   | 1.13 | 0  | 0     | 0     | 0  | 0     | 0    | 0  | 0     | 0     | 1 | 1 | 1           | 1           |
| GO:0007194 | 3   | 3   | 100   | 1.13 | 0  | 0     | 0     | 0  | 0     | 0    | 0  | 0     | 0     | 1 | 1 | 1           | 1           |
| GO:0007199 | 3   | 3   | 100   | 1.13 | 0  | 0     | 0     | 0  | 0     | 0    | 0  | 0     | 0     | 1 | 1 | 1           | 1           |
| GO:0007200 | 7   | 6   | 85.71 | 0.97 | 1  | 14.29 | 4.09  | 0  | 0     | 0    | 0  | 0     | 0     | 1 | 1 | 1           | 1           |
| GO:0007202 | 2   | 2   | 100   | 1.13 | 0  | 0     | 0     | 0  | 0     | 0    | 0  | 0     | 0     | 1 | 1 | 1           | 1           |
| GO:0007203 | 3   | 3   | 100   | 1.13 | 0  | 0     | 0     | 0  | 0     | 0    | 0  | 0     | 0     | 1 | 1 | 1           | 1           |
| GO:0007204 | 10  | 10  | 100   | 1.13 | 0  | 0     | 0     | 0  | 0     | 0    | 0  | 0     | 0     | 1 | 1 | 1           | 1           |
| GO:0007205 | 13  | 12  | 92.31 | 1.05 | 1  | 7.69  | 2.2   | 0  | 0     | 0    | 0  | 0     | 0     | 1 | 1 | 1           | 1           |
| GO:0007210 | 1   | 1   | 100   | 1.13 | 0  | 0     | 0     | 0  | 0     | 0    | 0  | 0     | 0     | 1 | 1 | 1           | 1           |
| GO:0007212 | 2   | 2   | 100   | 1.13 | 0  | 0     | 0     | 0  | 0     | 0    | 0  | 0     | 0     | 1 | 1 | 1           | 1           |
| GO:0007213 | 3   | 3   | 100   | 1.13 | 0  | 0     | 0     | 0  | 0     | 0    | 0  | 0     | 0     | 1 | 1 | 1           | 1           |
| GO:0007214 | 8   | 5   | 62.5  | 0.71 | 1  | 12.5  | 3.58  | 0  | 0     | 0    | 2  | 25    | 7.06  | 1 | 1 | 1           | 1           |
| GO:0007215 | 1   | 1   | 100   | 1.13 | 0  | 0     | 0     | 0  | 0     | 0    | 0  | 0     | 0     | 1 | 1 | 1           | 1           |
| GO:0007216 | 1   | 1   | 100   | 1.13 | 0  | 0     | 0     | 0  | 0     | 0    | 0  | 0     | 0     | 1 | 1 | 1           | 1           |

|            |     |     |       |      |    |      |       |    |       |       |    |      |      |             |   |   |   |
|------------|-----|-----|-------|------|----|------|-------|----|-------|-------|----|------|------|-------------|---|---|---|
| GO:0007217 | 1   | 1   | 100   | 1.13 | 0  | 0    | 0     | 0  | 0     | 0     | 0  | 0    | 1    | 1           | 1 | 1 |   |
| GO:0007218 | 59  | 54  | 91.53 | 1.04 | 0  | 0    | 0     | 3  | 5.08  | 1.09  | 2  | 3.39 | 0.96 | 1           | 1 | 1 | 1 |
| GO:0007219 | 8   | 7   | 87.5  | 0.99 | 0  | 0    | 0     | 0  | 0     | 0     | 1  | 12.5 | 3.53 | 1           | 1 | 1 | 1 |
| GO:0007222 | 6   | 6   | 100   | 1.13 | 0  | 0    | 0     | 0  | 0     | 0     | 0  | 0    | 0    | 1           | 1 | 1 | 1 |
| GO:0007223 | 8   | 8   | 100   | 1.13 | 0  | 0    | 0     | 0  | 0     | 0     | 0  | 0    | 0    | 1           | 1 | 1 | 1 |
| GO:0007229 | 74  | 56  | 75.68 | 0.86 | 5  | 6.76 | 1.93  | 8  | 10.81 | 2.33  | 5  | 6.76 | 1.91 | 1           | 1 | 1 | 1 |
| GO:0007231 | 2   | 2   | 100   | 1.13 | 0  | 0    | 0     | 0  | 0     | 0     | 0  | 0    | 0    | 1           | 1 | 1 | 1 |
| GO:0007242 | 537 | 486 | 90.5  | 1.02 | 11 | 2.05 | 0.59  | 29 | 5.4   | 1.16  | 11 | 2.05 | 0.58 | 1           | 1 | 1 | 1 |
| GO:0007243 | 11  | 9   | 81.82 | 0.93 | 0  | 0    | 0     | 1  | 9.09  | 1.96  | 1  | 9.09 | 2.57 | 1           | 1 | 1 | 1 |
| GO:0007249 | 41  | 38  | 92.68 | 1.05 | 0  | 0    | 0     | 3  | 7.32  | 1.58  | 0  | 0    | 0    | 1           | 1 | 1 | 1 |
| GO:0007250 | 1   | 0   | 0     | 0    | 0  | 0    | 0     | 1  | 100   | 21.53 | 0  | 0    | 0    | 1           | 1 | 1 | 1 |
| GO:0007252 | 9   | 9   | 100   | 1.13 | 0  | 0    | 0     | 0  | 0     | 0     | 0  | 0    | 0    | 1           | 1 | 1 | 1 |
| GO:0007253 | 1   | 1   | 100   | 1.13 | 0  | 0    | 0     | 0  | 0     | 0     | 0  | 0    | 0    | 1           | 1 | 1 | 1 |
| GO:0007254 | 14  | 14  | 100   | 1.13 | 0  | 0    | 0     | 0  | 0     | 0     | 0  | 0    | 0    | 1           | 1 | 1 | 1 |
| GO:0007256 | 1   | 1   | 100   | 1.13 | 0  | 0    | 0     | 0  | 0     | 0     | 0  | 0    | 0    | 1           | 1 | 1 | 1 |
| GO:0007257 | 3   | 3   | 100   | 1.13 | 0  | 0    | 0     | 0  | 0     | 0     | 0  | 0    | 0    | 1           | 1 | 1 | 1 |
| GO:0007259 | 16  | 14  | 87.5  | 0.99 | 0  | 0    | 0     | 2  | 12.5  | 2.69  | 0  | 0    | 0    | 1           | 1 | 1 | 1 |
| GO:0007260 | 3   | 3   | 100   | 1.13 | 0  | 0    | 0     | 0  | 0     | 0     | 0  | 0    | 0    | 1           | 1 | 1 | 1 |
| GO:0007261 | 3   | 3   | 100   | 1.13 | 0  | 0    | 0     | 0  | 0     | 0     | 0  | 0    | 0    | 1           | 1 | 1 | 1 |
| GO:0007262 | 3   | 3   | 100   | 1.13 | 0  | 0    | 0     | 0  | 0     | 0     | 0  | 0    | 0    | 1           | 1 | 1 | 1 |
| GO:0007263 | 1   | 1   | 100   | 1.13 | 0  | 0    | 0     | 0  | 0     | 0     | 0  | 0    | 0    | 1           | 1 | 1 | 1 |
| GO:0007264 | 314 | 302 | 96.18 | 1.09 | 4  | 1.27 | 0.36  | 5  | 1.59  | 0.34  | 3  | 0.96 | 0.27 | 0.000275514 | 1 | 1 | 1 |
| GO:0007265 | 33  | 29  | 87.88 | 1    | 1  | 3.03 | 0.87  | 3  | 9.09  | 1.96  | 0  | 0    | 0    | 1           | 1 | 1 | 1 |
| GO:0007266 | 45  | 45  | 100   | 1.13 | 0  | 0    | 0     | 0  | 0     | 0     | 0  | 0    | 0    | 1           | 1 | 1 | 1 |
| GO:0007267 | 52  | 38  | 73.08 | 0.83 | 5  | 9.62 | 2.75  | 5  | 9.62  | 2.07  | 4  | 7.69 | 2.17 | 1           | 1 | 1 | 1 |
| GO:0007268 | 68  | 59  | 86.76 | 0.98 | 5  | 7.35 | 2.11  | 1  | 1.47  | 0.32  | 3  | 4.41 | 1.25 | 1           | 1 | 1 | 1 |
| GO:0007269 | 21  | 19  | 90.48 | 1.02 | 0  | 0    | 0     | 2  | 9.52  | 2.05  | 0  | 0    | 0    | 1           | 1 | 1 | 1 |
| GO:0007270 | 13  | 13  | 100   | 1.13 | 0  | 0    | 0     | 0  | 0     | 0     | 0  | 0    | 0    | 1           | 1 | 1 | 1 |
| GO:0007271 | 2   | 2   | 100   | 1.13 | 0  | 0    | 0     | 0  | 0     | 0     | 0  | 0    | 0    | 1           | 1 | 1 | 1 |
| GO:0007272 | 4   | 3   | 75    | 0.85 | 1  | 25   | 7.16  | 0  | 0     | 0     | 0  | 0    | 0    | 1           | 1 | 1 | 1 |
| GO:0007273 | 1   | 1   | 100   | 1.13 | 0  | 0    | 0     | 0  | 0     | 0     | 0  | 0    | 0    | 1           | 1 | 1 | 1 |
| GO:0007275 | 289 | 249 | 86.16 | 0.98 | 18 | 6.23 | 1.78  | 11 | 3.81  | 0.82  | 11 | 3.81 | 1.07 | 1           | 1 | 1 | 1 |
| GO:0007276 | 5   | 5   | 100   | 1.13 | 0  | 0    | 0     | 0  | 0     | 0     | 0  | 0    | 0    | 1           | 1 | 1 | 1 |
| GO:0007281 | 9   | 9   | 100   | 1.13 | 0  | 0    | 0     | 0  | 0     | 0     | 0  | 0    | 0    | 1           | 1 | 1 | 1 |
| GO:0007283 | 74  | 64  | 86.49 | 0.98 | 4  | 5.41 | 1.55  | 5  | 6.76  | 1.45  | 1  | 1.35 | 0.38 | 1           | 1 | 1 | 1 |
| GO:0007286 | 5   | 5   | 100   | 1.13 | 0  | 0    | 0     | 0  | 0     | 0     | 0  | 0    | 0    | 1           | 1 | 1 | 1 |
| GO:0007288 | 3   | 3   | 100   | 1.13 | 0  | 0    | 0     | 0  | 0     | 0     | 0  | 0    | 0    | 1           | 1 | 1 | 1 |
| GO:0007292 | 8   | 8   | 100   | 1.13 | 0  | 0    | 0     | 0  | 0     | 0     | 0  | 0    | 0    | 1           | 1 | 1 | 1 |
| GO:0007301 | 1   | 1   | 100   | 1.13 | 0  | 0    | 0     | 0  | 0     | 0     | 0  | 0    | 0    | 1           | 1 | 1 | 1 |
| GO:0007304 | 1   | 0   | 0     | 0    | 1  | 100  | 28.63 | 0  | 0     | 0     | 0  | 0    | 0    | 1           | 1 | 1 | 1 |
| GO:0007328 | 1   | 1   | 100   | 1.13 | 0  | 0    | 0     | 0  | 0     | 0     | 0  | 0    | 0    | 1           | 1 | 1 | 1 |



|            |     |     |       |      |    |       |       |   |       |      |   |       |       |   |   |   |   |
|------------|-----|-----|-------|------|----|-------|-------|---|-------|------|---|-------|-------|---|---|---|---|
| GO:0007335 | 3   | 3   | 100   | 1.13 | 0  | 0     | 0     | 0 | 0     | 0    | 0 | 0     | 1     | 1 | 1 | 1 |   |
| GO:0007338 | 13  | 9   | 69.23 | 0.78 | 0  | 0     | 0     | 2 | 15.38 | 3.31 | 2 | 15.38 | 4.34  | 1 | 1 | 1 | 1 |
| GO:0007339 | 1   | 1   | 100   | 1.13 | 0  | 0     | 0     | 0 | 0     | 0    | 0 | 0     | 1     | 1 | 1 | 1 |   |
| GO:0007340 | 3   | 3   | 100   | 1.13 | 0  | 0     | 0     | 0 | 0     | 0    | 0 | 0     | 1     | 1 | 1 | 1 |   |
| GO:0007341 | 1   | 0   | 0     | 0    | 0  | 0     | 0     | 0 | 0     | 0    | 1 | 100   | 28.22 | 1 | 1 | 1 | 1 |
| GO:0007345 | 53  | 49  | 92.45 | 1.05 | 3  | 5.66  | 1.62  | 1 | 1.89  | 0.41 | 0 | 0     | 0     | 1 | 1 | 1 | 1 |
| GO:0007346 | 3   | 3   | 100   | 1.13 | 0  | 0     | 0     | 0 | 0     | 0    | 0 | 0     | 0     | 1 | 1 | 1 | 1 |
| GO:0007368 | 2   | 2   | 100   | 1.13 | 0  | 0     | 0     | 0 | 0     | 0    | 0 | 0     | 0     | 1 | 1 | 1 | 1 |
| GO:0007369 | 1   | 1   | 100   | 1.13 | 0  | 0     | 0     | 0 | 0     | 0    | 0 | 0     | 0     | 1 | 1 | 1 | 1 |
| GO:0007379 | 6   | 6   | 100   | 1.13 | 0  | 0     | 0     | 0 | 0     | 0    | 0 | 0     | 0     | 1 | 1 | 1 | 1 |
| GO:0007386 | 1   | 1   | 100   | 1.13 | 0  | 0     | 0     | 0 | 0     | 0    | 0 | 0     | 0     | 1 | 1 | 1 | 1 |
| GO:0007389 | 21  | 13  | 61.9  | 0.7  | 4  | 19.05 | 5.45  | 3 | 14.29 | 3.08 | 1 | 4.76  | 1.34  | 1 | 1 | 1 | 1 |
| GO:0007397 | 54  | 41  | 75.93 | 0.86 | 7  | 12.96 | 3.71  | 5 | 9.26  | 1.99 | 1 | 1.85  | 0.52  | 1 | 1 | 1 | 1 |
| GO:0007398 | 1   | 1   | 100   | 1.13 | 0  | 0     | 0     | 0 | 0     | 0    | 0 | 0     | 0     | 1 | 1 | 1 | 1 |
| GO:0007399 | 138 | 115 | 83.33 | 0.94 | 12 | 8.7   | 2.49  | 5 | 3.62  | 0.78 | 6 | 4.35  | 1.23  | 1 | 1 | 1 | 1 |
| GO:0007400 | 1   | 1   | 100   | 1.13 | 0  | 0     | 0     | 0 | 0     | 0    | 0 | 0     | 0     | 1 | 1 | 1 | 1 |
| GO:0007401 | 1   | 0   | 0     | 0    | 1  | 100   | 28.63 | 0 | 0     | 0    | 0 | 0     | 0     | 1 | 1 | 1 | 1 |
| GO:0007405 | 13  | 13  | 100   | 1.13 | 0  | 0     | 0     | 0 | 0     | 0    | 0 | 0     | 0     | 1 | 1 | 1 | 1 |
| GO:0007409 | 13  | 12  | 92.31 | 1.05 | 0  | 0     | 0     | 1 | 7.69  | 1.66 | 0 | 0     | 0     | 1 | 1 | 1 | 1 |
| GO:0007411 | 26  | 23  | 88.46 | 1    | 1  | 3.85  | 1.1   | 1 | 3.85  | 0.83 | 1 | 3.85  | 1.09  | 1 | 1 | 1 | 1 |
| GO:0007417 | 33  | 30  | 90.91 | 1.03 | 2  | 6.06  | 1.74  | 1 | 3.03  | 0.65 | 0 | 0     | 0     | 1 | 1 | 1 | 1 |
| GO:0007418 | 1   | 0   | 0     | 0    | 1  | 100   | 28.63 | 0 | 0     | 0    | 0 | 0     | 0     | 1 | 1 | 1 | 1 |
| GO:0007420 | 18  | 18  | 100   | 1.13 | 0  | 0     | 0     | 0 | 0     | 0    | 0 | 0     | 0     | 1 | 1 | 1 | 1 |
| GO:0007422 | 4   | 4   | 100   | 1.13 | 0  | 0     | 0     | 0 | 0     | 0    | 0 | 0     | 0     | 1 | 1 | 1 | 1 |
| GO:0007423 | 12  | 11  | 91.67 | 1.04 | 0  | 0     | 0     | 0 | 0     | 0    | 1 | 8.33  | 2.35  | 1 | 1 | 1 | 1 |
| GO:0007435 | 1   | 1   | 100   | 1.13 | 0  | 0     | 0     | 0 | 0     | 0    | 0 | 0     | 0     | 1 | 1 | 1 | 1 |
| GO:0007456 | 6   | 6   | 100   | 1.13 | 0  | 0     | 0     | 0 | 0     | 0    | 0 | 0     | 0     | 1 | 1 | 1 | 1 |
| GO:0007485 | 1   | 0   | 0     | 0    | 1  | 100   | 28.63 | 0 | 0     | 0    | 0 | 0     | 0     | 1 | 1 | 1 | 1 |
| GO:0007492 | 10  | 6   | 60    | 0.68 | 1  | 10    | 2.86  | 3 | 30    | 6.46 | 0 | 0     | 0     | 1 | 1 | 1 | 1 |
| GO:0007498 | 6   | 5   | 83.33 | 0.94 | 0  | 0     | 0     | 1 | 16.67 | 3.59 | 0 | 0     | 0     | 1 | 1 | 1 | 1 |
| GO:0007500 | 2   | 1   | 50    | 0.57 | 1  | 50    | 14.32 | 0 | 0     | 0    | 0 | 0     | 0     | 1 | 1 | 1 | 1 |
| GO:0007507 | 28  | 26  | 92.86 | 1.05 | 0  | 0     | 0     | 1 | 3.57  | 0.77 | 1 | 3.57  | 1.01  | 1 | 1 | 1 | 1 |
| GO:0007515 | 27  | 23  | 85.19 | 0.96 | 1  | 3.7   | 1.06  | 0 | 0     | 0    | 3 | 11.11 | 3.14  | 1 | 1 | 1 | 1 |
| GO:0007516 | 1   | 1   | 100   | 1.13 | 0  | 0     | 0     | 0 | 0     | 0    | 0 | 0     | 0     | 1 | 1 | 1 | 1 |
| GO:0007517 | 72  | 63  | 87.5  | 0.99 | 4  | 5.56  | 1.59  | 4 | 5.56  | 1.2  | 1 | 1.39  | 0.39  | 1 | 1 | 1 | 1 |
| GO:0007519 | 17  | 15  | 88.24 | 1    | 1  | 5.88  | 1.68  | 0 | 0     | 0    | 1 | 5.88  | 1.66  | 1 | 1 | 1 | 1 |
| GO:0007528 | 1   | 1   | 100   | 1.13 | 0  | 0     | 0     | 0 | 0     | 0    | 0 | 0     | 0     | 1 | 1 | 1 | 1 |
| GO:0007529 | 1   | 1   | 100   | 1.13 | 0  | 0     | 0     | 0 | 0     | 0    | 0 | 0     | 0     | 1 | 1 | 1 | 1 |
| GO:0007530 | 4   | 4   | 100   | 1.13 | 0  | 0     | 0     | 0 | 0     | 0    | 0 | 0     | 0     | 1 | 1 | 1 | 1 |
| GO:0007548 | 6   | 6   | 100   | 1.13 | 0  | 0     | 0     | 0 | 0     | 0    | 0 | 0     | 0     | 1 | 1 | 1 | 1 |
| GO:0007549 | 2   | 2   | 100   | 1.13 | 0  | 0     | 0     | 0 | 0     | 0    | 0 | 0     | 0     | 1 | 1 | 1 | 1 |

|            |    |    |       |      |   |       |       |    |       |       |      |       |       |   |   |             |             |
|------------|----|----|-------|------|---|-------|-------|----|-------|-------|------|-------|-------|---|---|-------------|-------------|
| GO:0007565 | 9  | 9  | 100   | 1.13 | 0 | 0     | 0     | 0  | 0     | 0     | 0    | 0     | 1     | 1 | 1 | 1           |             |
| GO:0007566 | 2  | 2  | 100   | 1.13 | 0 | 0     | 0     | 0  | 0     | 0     | 0    | 0     | 1     | 1 | 1 | 1           |             |
| GO:0007568 | 3  | 3  | 100   | 1.13 | 0 | 0     | 0     | 0  | 0     | 0     | 0    | 0     | 1     | 1 | 1 | 1           |             |
| GO:0007569 | 4  | 4  | 100   | 1.13 | 0 | 0     | 0     | 0  | 0     | 0     | 0    | 0     | 1     | 1 | 1 | 1           |             |
| GO:0007582 | 11 | 10 | 90.91 | 1.03 | 0 | 0     | 0     | 0  | 0     | 1     | 9.09 | 2.57  | 1     | 1 | 1 | 1           |             |
| GO:0007583 | 5  | 4  | 80    | 0.91 | 1 | 20    | 5.73  | 0  | 0     | 0     | 0    | 0     | 1     | 1 | 1 | 1           |             |
| GO:0007584 | 3  | 3  | 100   | 1.13 | 0 | 0     | 0     | 0  | 0     | 0     | 0    | 0     | 1     | 1 | 1 | 1           |             |
| GO:0007585 | 11 | 11 | 100   | 1.13 | 0 | 0     | 0     | 0  | 0     | 0     | 0    | 0     | 1     | 1 | 1 | 1           |             |
| GO:0007586 | 12 | 9  | 75    | 0.85 | 1 | 8.33  | 2.39  | 0  | 0     | 0     | 2    | 16.67 | 4.7   | 1 | 1 | 1           | 1           |
| GO:0007588 | 9  | 5  | 55.56 | 0.63 | 0 | 0     | 0     | 4  | 44.44 | 9.57  | 0    | 0     | 0     | 1 | 1 | 1           | 1           |
| GO:0007595 | 9  | 4  | 44.44 | 0.5  | 0 | 0     | 0     | 3  | 33.33 | 7.18  | 2    | 22.22 | 6.27  | 1 | 1 | 1           | 1           |
| GO:0007596 | 56 | 43 | 76.79 | 0.87 | 1 | 1.79  | 0.51  | 2  | 3.57  | 0.77  | 10   | 17.86 | 5.04  | 1 | 1 | 1           | 0.194824138 |
| GO:0007599 | 2  | 1  | 50    | 0.57 | 1 | 50    | 14.32 | 0  | 0     | 0     | 0    | 0     | 0     | 1 | 1 | 1           | 1           |
| GO:0007600 | 19 | 19 | 100   | 1.13 | 0 | 0     | 0     | 0  | 0     | 0     | 0    | 0     | 0     | 1 | 1 | 1           | 1           |
| GO:0007601 | 34 | 33 | 97.06 | 1.1  | 1 | 2.94  | 0.84  | 0  | 0     | 0     | 0    | 0     | 0     | 1 | 1 | 1           | 1           |
| GO:0007602 | 11 | 11 | 100   | 1.13 | 0 | 0     | 0     | 0  | 0     | 0     | 0    | 0     | 0     | 1 | 1 | 1           | 1           |
| GO:0007603 | 2  | 2  | 100   | 1.13 | 0 | 0     | 0     | 0  | 0     | 0     | 0    | 0     | 0     | 1 | 1 | 1           | 1           |
| GO:0007605 | 34 | 31 | 91.18 | 1.03 | 0 | 0     | 0     | 2  | 5.88  | 1.27  | 1    | 2.94  | 0.83  | 1 | 1 | 1           | 1           |
| GO:0007607 | 1  | 1  | 100   | 1.13 | 0 | 0     | 0     | 0  | 0     | 0     | 0    | 0     | 0     | 1 | 1 | 1           | 1           |
| GO:0007608 | 6  | 6  | 100   | 1.13 | 0 | 0     | 0     | 0  | 0     | 0     | 0    | 0     | 0     | 1 | 1 | 1           | 1           |
| GO:0007610 | 10 | 7  | 70    | 0.79 | 1 | 10    | 2.86  | 0  | 0     | 0     | 2    | 20    | 5.64  | 1 | 1 | 1           | 1           |
| GO:0007611 | 2  | 2  | 100   | 1.13 | 0 | 0     | 0     | 0  | 0     | 0     | 0    | 0     | 0     | 1 | 1 | 1           | 1           |
| GO:0007612 | 18 | 18 | 100   | 1.13 | 0 | 0     | 0     | 0  | 0     | 0     | 0    | 0     | 0     | 1 | 1 | 1           | 1           |
| GO:0007613 | 9  | 9  | 100   | 1.13 | 0 | 0     | 0     | 0  | 0     | 0     | 0    | 0     | 0     | 1 | 1 | 1           | 1           |
| GO:0007620 | 3  | 1  | 33.33 | 0.38 | 0 | 0     | 0     | 0  | 0     | 0     | 2    | 66.67 | 18.82 | 1 | 1 | 1           | 1           |
| GO:0007622 | 13 | 13 | 100   | 1.13 | 0 | 0     | 0     | 0  | 0     | 0     | 0    | 0     | 0     | 1 | 1 | 1           | 1           |
| GO:0007623 | 14 | 12 | 85.71 | 0.97 | 2 | 14.29 | 4.09  | 0  | 0     | 0     | 0    | 0     | 0     | 1 | 1 | 1           | 1           |
| GO:0007624 | 1  | 1  | 100   | 1.13 | 0 | 0     | 0     | 0  | 0     | 0     | 0    | 0     | 0     | 1 | 1 | 1           | 1           |
| GO:0007625 | 5  | 5  | 100   | 1.13 | 0 | 0     | 0     | 0  | 0     | 0     | 0    | 0     | 0     | 1 | 1 | 1           | 1           |
| GO:0007626 | 5  | 3  | 60    | 0.68 | 1 | 20    | 5.73  | 1  | 20    | 4.31  | 0    | 0     | 0     | 1 | 1 | 1           | 1           |
| GO:0007631 | 7  | 6  | 85.71 | 0.97 | 1 | 14.29 | 4.09  | 0  | 0     | 0     | 0    | 0     | 0     | 1 | 1 | 1           | 1           |
| GO:0007638 | 1  | 0  | 0     | 0    | 1 | 100   | 28.63 | 0  | 0     | 0     | 0    | 0     | 0     | 1 | 1 | 1           | 1           |
| GO:0008001 | 1  | 0  | 0     | 0    | 0 | 0     | 0     | 0  | 0     | 0     | 1    | 100   | 28.22 | 1 | 1 | 1           | 1           |
| GO:0008009 | 45 | 25 | 55.56 | 0.63 | 0 | 0     | 0     | 11 | 24.44 | 5.26  | 9    | 20    | 5.64  | 1 | 1 | 0.032849416 | 0.180543513 |
| GO:0008013 | 1  | 1  | 100   | 1.13 | 0 | 0     | 0     | 0  | 0     | 0     | 0    | 0     | 0     | 1 | 1 | 1           | 1           |
| GO:0008014 | 28 | 15 | 53.57 | 0.61 | 3 | 10.71 | 3.07  | 1  | 3.57  | 0.77  | 9    | 32.14 | 9.07  | 1 | 1 | 1           | 0.00255928  |
| GO:0008015 | 6  | 3  | 50    | 0.57 | 0 | 0     | 0     | 3  | 50    | 10.76 | 0    | 0     | 0     | 1 | 1 | 1           | 1           |
| GO:0008016 | 13 | 12 | 92.31 | 1.05 | 0 | 0     | 0     | 1  | 7.69  | 1.66  | 0    | 0     | 0     | 1 | 1 | 1           | 1           |
| GO:0008017 | 22 | 21 | 95.45 | 1.08 | 0 | 0     | 0     | 0  | 0     | 0     | 1    | 4.55  | 1.28  | 1 | 1 | 1           | 1           |
| GO:0008020 | 2  | 2  | 100   | 1.13 | 0 | 0     | 0     | 0  | 0     | 0     | 0    | 0     | 0     | 1 | 1 | 1           | 1           |
| GO:0008021 | 44 | 38 | 86.36 | 0.98 | 2 | 4.55  | 1.3   | 4  | 9.09  | 1.96  | 0    | 0     | 0     | 1 | 1 | 1           | 1           |

|            |     |     |       |      |   |      |       |   |       |       |   |       |      |   |   |   |   |
|------------|-----|-----|-------|------|---|------|-------|---|-------|-------|---|-------|------|---|---|---|---|
| GO:0008022 | 10  | 10  | 100   | 1.13 | 0 | 0    | 0     | 0 | 0     | 0     | 0 | 0     | 0    | 1 | 1 | 1 | 1 |
| GO:0008023 | 6   | 6   | 100   | 1.13 | 0 | 0    | 0     | 0 | 0     | 0     | 0 | 0     | 0    | 1 | 1 | 1 | 1 |
| GO:0008026 | 146 | 136 | 93.15 | 1.05 | 6 | 4.11 | 1.18  | 1 | 0.68  | 0.15  | 3 | 2.05  | 0.58 | 1 | 1 | 1 | 1 |
| GO:0008028 | 3   | 2   | 66.67 | 0.75 | 0 | 0    | 0     | 1 | 33.33 | 7.18  | 0 | 0     | 0    | 1 | 1 | 1 | 1 |
| GO:0008033 | 28  | 27  | 96.43 | 1.09 | 1 | 3.57 | 1.02  | 0 | 0     | 0     | 0 | 0     | 0    | 1 | 1 | 1 | 1 |
| GO:0008034 | 1   | 1   | 100   | 1.13 | 0 | 0    | 0     | 0 | 0     | 0     | 0 | 0     | 0    | 1 | 1 | 1 | 1 |
| GO:0008037 | 3   | 3   | 100   | 1.13 | 0 | 0    | 0     | 0 | 0     | 0     | 0 | 0     | 0    | 1 | 1 | 1 | 1 |
| GO:0008042 | 15  | 15  | 100   | 1.13 | 0 | 0    | 0     | 0 | 0     | 0     | 0 | 0     | 0    | 1 | 1 | 1 | 1 |
| GO:0008045 | 5   | 5   | 100   | 1.13 | 0 | 0    | 0     | 0 | 0     | 0     | 0 | 0     | 0    | 1 | 1 | 1 | 1 |
| GO:0008046 | 5   | 5   | 100   | 1.13 | 0 | 0    | 0     | 0 | 0     | 0     | 0 | 0     | 0    | 1 | 1 | 1 | 1 |
| GO:0008047 | 19  | 17  | 89.47 | 1.01 | 0 | 0    | 0     | 2 | 10.53 | 2.27  | 0 | 0     | 0    | 1 | 1 | 1 | 1 |
| GO:0008048 | 1   | 1   | 100   | 1.13 | 0 | 0    | 0     | 0 | 0     | 0     | 0 | 0     | 0    | 1 | 1 | 1 | 1 |
| GO:0008051 | 5   | 5   | 100   | 1.13 | 0 | 0    | 0     | 0 | 0     | 0     | 0 | 0     | 0    | 1 | 1 | 1 | 1 |
| GO:0008053 | 5   | 5   | 100   | 1.13 | 0 | 0    | 0     | 0 | 0     | 0     | 0 | 0     | 0    | 1 | 1 | 1 | 1 |
| GO:0008054 | 2   | 1   | 50    | 0.57 | 1 | 50   | 14.32 | 0 | 0     | 0     | 0 | 0     | 0    | 1 | 1 | 1 | 1 |
| GO:0008060 | 1   | 1   | 100   | 1.13 | 0 | 0    | 0     | 0 | 0     | 0     | 0 | 0     | 0    | 1 | 1 | 1 | 1 |
| GO:0008064 | 2   | 2   | 100   | 1.13 | 0 | 0    | 0     | 0 | 0     | 0     | 0 | 0     | 0    | 1 | 1 | 1 | 1 |
| GO:0008067 | 7   | 7   | 100   | 1.13 | 0 | 0    | 0     | 0 | 0     | 0     | 0 | 0     | 0    | 1 | 1 | 1 | 1 |
| GO:0008073 | 4   | 4   | 100   | 1.13 | 0 | 0    | 0     | 0 | 0     | 0     | 0 | 0     | 0    | 1 | 1 | 1 | 1 |
| GO:0008075 | 1   | 1   | 100   | 1.13 | 0 | 0    | 0     | 0 | 0     | 0     | 0 | 0     | 0    | 1 | 1 | 1 | 1 |
| GO:0008076 | 60  | 56  | 93.33 | 1.06 | 1 | 1.67 | 0.48  | 2 | 3.33  | 0.72  | 1 | 1.67  | 0.47 | 1 | 1 | 1 | 1 |
| GO:0008077 | 6   | 6   | 100   | 1.13 | 0 | 0    | 0     | 0 | 0     | 0     | 0 | 0     | 0    | 1 | 1 | 1 | 1 |
| GO:0008080 | 42  | 39  | 92.86 | 1.05 | 2 | 4.76 | 1.36  | 0 | 0     | 0     | 1 | 2.38  | 0.67 | 1 | 1 | 1 | 1 |
| GO:0008081 | 3   | 3   | 100   | 1.13 | 0 | 0    | 0     | 0 | 0     | 0     | 0 | 0     | 0    | 1 | 1 | 1 | 1 |
| GO:0008083 | 60  | 49  | 81.67 | 0.92 | 1 | 1.67 | 0.48  | 4 | 6.67  | 1.44  | 6 | 10    | 2.82 | 1 | 1 | 1 | 1 |
| GO:0008090 | 12  | 12  | 100   | 1.13 | 0 | 0    | 0     | 0 | 0     | 0     | 0 | 0     | 0    | 1 | 1 | 1 | 1 |
| GO:0008091 | 4   | 1   | 25    | 0.28 | 2 | 50   | 14.32 | 0 | 0     | 0     | 1 | 25    | 7.06 | 1 | 1 | 1 | 1 |
| GO:0008092 | 23  | 23  | 100   | 1.13 | 0 | 0    | 0     | 0 | 0     | 0     | 0 | 0     | 0    | 1 | 1 | 1 | 1 |
| GO:0008093 | 3   | 2   | 66.67 | 0.75 | 0 | 0    | 0     | 0 | 0     | 0     | 1 | 33.33 | 9.41 | 1 | 1 | 1 | 1 |
| GO:0008094 | 40  | 37  | 92.5  | 1.05 | 2 | 5    | 1.43  | 0 | 0     | 0     | 1 | 2.5   | 0.71 | 1 | 1 | 1 | 1 |
| GO:0008095 | 1   | 1   | 100   | 1.13 | 0 | 0    | 0     | 0 | 0     | 0     | 0 | 0     | 0    | 1 | 1 | 1 | 1 |
| GO:0008097 | 1   | 1   | 100   | 1.13 | 0 | 0    | 0     | 0 | 0     | 0     | 0 | 0     | 0    | 1 | 1 | 1 | 1 |
| GO:0008099 | 1   | 1   | 100   | 1.13 | 0 | 0    | 0     | 0 | 0     | 0     | 0 | 0     | 0    | 1 | 1 | 1 | 1 |
| GO:0008104 | 15  | 15  | 100   | 1.13 | 0 | 0    | 0     | 0 | 0     | 0     | 0 | 0     | 0    | 1 | 1 | 1 | 1 |
| GO:0008106 | 6   | 6   | 100   | 1.13 | 0 | 0    | 0     | 0 | 0     | 0     | 0 | 0     | 0    | 1 | 1 | 1 | 1 |
| GO:0008107 | 1   | 1   | 100   | 1.13 | 0 | 0    | 0     | 0 | 0     | 0     | 0 | 0     | 0    | 1 | 1 | 1 | 1 |
| GO:0008108 | 1   | 0   | 0     | 0    | 0 | 0    | 0     | 1 | 100   | 21.53 | 0 | 0     | 0    | 1 | 1 | 1 | 1 |
| GO:0008109 | 1   | 1   | 100   | 1.13 | 0 | 0    | 0     | 0 | 0     | 0     | 0 | 0     | 0    | 1 | 1 | 1 | 1 |
| GO:0008110 | 1   | 1   | 100   | 1.13 | 0 | 0    | 0     | 0 | 0     | 0     | 0 | 0     | 0    | 1 | 1 | 1 | 1 |
| GO:0008111 | 3   | 3   | 100   | 1.13 | 0 | 0    | 0     | 0 | 0     | 0     | 0 | 0     | 0    | 1 | 1 | 1 | 1 |
| GO:0008113 | 2   | 1   | 50    | 0.57 | 0 | 0    | 0     | 1 | 50    | 10.76 | 0 | 0     | 0    | 1 | 1 | 1 | 1 |

|            |     |     |       |      |    |      |       |    |       |       |    |       |       |   |   |   |   |
|------------|-----|-----|-------|------|----|------|-------|----|-------|-------|----|-------|-------|---|---|---|---|
| GO:0008114 | 6   | 6   | 100   | 1.13 | 0  | 0    | 0     | 0  | 0     | 0     | 0  | 0     | 0     | 1 | 1 | 1 | 1 |
| GO:0008115 | 1   | 1   | 100   | 1.13 | 0  | 0    | 0     | 0  | 0     | 0     | 0  | 0     | 0     | 1 | 1 | 1 | 1 |
| GO:0008116 | 1   | 1   | 100   | 1.13 | 0  | 0    | 0     | 0  | 0     | 0     | 0  | 0     | 0     | 1 | 1 | 1 | 1 |
| GO:0008117 | 5   | 5   | 100   | 1.13 | 0  | 0    | 0     | 0  | 0     | 0     | 0  | 0     | 0     | 1 | 1 | 1 | 1 |
| GO:0008118 | 5   | 5   | 100   | 1.13 | 0  | 0    | 0     | 0  | 0     | 0     | 0  | 0     | 0     | 1 | 1 | 1 | 1 |
| GO:0008119 | 1   | 0   | 0     | 0    | 1  | 100  | 28.63 | 0  | 0     | 0     | 0  | 0     | 0     | 1 | 1 | 1 | 1 |
| GO:0008120 | 2   | 2   | 100   | 1.13 | 0  | 0    | 0     | 0  | 0     | 0     | 0  | 0     | 0     | 1 | 1 | 1 | 1 |
| GO:0008121 | 18  | 15  | 83.33 | 0.94 | 1  | 5.56 | 1.59  | 2  | 11.11 | 2.39  | 0  | 0     | 0     | 1 | 1 | 1 | 1 |
| GO:0008123 | 2   | 0   | 0     | 0    | 0  | 0    | 0     | 0  | 0     | 0     | 2  | 100   | 28.22 | 1 | 1 | 1 | 1 |
| GO:0008124 | 2   | 2   | 100   | 1.13 | 0  | 0    | 0     | 0  | 0     | 0     | 0  | 0     | 0     | 1 | 1 | 1 | 1 |
| GO:0008129 | 3   | 3   | 100   | 1.13 | 0  | 0    | 0     | 0  | 0     | 0     | 0  | 0     | 0     | 1 | 1 | 1 | 1 |
| GO:0008130 | 2   | 1   | 50    | 0.57 | 0  | 0    | 0     | 1  | 50    | 10.76 | 0  | 0     | 0     | 1 | 1 | 1 | 1 |
| GO:0008131 | 3   | 3   | 100   | 1.13 | 0  | 0    | 0     | 0  | 0     | 0     | 0  | 0     | 0     | 1 | 1 | 1 | 1 |
| GO:0008132 | 2   | 2   | 100   | 1.13 | 0  | 0    | 0     | 0  | 0     | 0     | 0  | 0     | 0     | 1 | 1 | 1 | 1 |
| GO:0008133 | 4   | 0   | 0     | 0    | 1  | 25   | 7.16  | 2  | 50    | 10.76 | 1  | 25    | 7.06  | 1 | 1 | 1 | 1 |
| GO:0008134 | 27  | 27  | 100   | 1.13 | 0  | 0    | 0     | 0  | 0     | 0     | 0  | 0     | 0     | 1 | 1 | 1 | 1 |
| GO:0008135 | 10  | 10  | 100   | 1.13 | 0  | 0    | 0     | 0  | 0     | 0     | 0  | 0     | 0     | 1 | 1 | 1 | 1 |
| GO:0008136 | 2   | 2   | 100   | 1.13 | 0  | 0    | 0     | 0  | 0     | 0     | 0  | 0     | 0     | 1 | 1 | 1 | 1 |
| GO:0008137 | 47  | 44  | 93.62 | 1.06 | 1  | 2.13 | 0.61  | 1  | 2.13  | 0.46  | 1  | 2.13  | 0.6   | 1 | 1 | 1 | 1 |
| GO:0008138 | 51  | 50  | 98.04 | 1.11 | 1  | 1.96 | 0.56  | 0  | 0     | 0     | 0  | 0     | 0     | 1 | 1 | 1 | 1 |
| GO:0008139 | 5   | 5   | 100   | 1.13 | 0  | 0    | 0     | 0  | 0     | 0     | 0  | 0     | 0     | 1 | 1 | 1 | 1 |
| GO:0008140 | 2   | 2   | 100   | 1.13 | 0  | 0    | 0     | 0  | 0     | 0     | 0  | 0     | 0     | 1 | 1 | 1 | 1 |
| GO:0008142 | 1   | 1   | 100   | 1.13 | 0  | 0    | 0     | 0  | 0     | 0     | 0  | 0     | 0     | 1 | 1 | 1 | 1 |
| GO:0008143 | 2   | 2   | 100   | 1.13 | 0  | 0    | 0     | 0  | 0     | 0     | 0  | 0     | 0     | 1 | 1 | 1 | 1 |
| GO:0008146 | 24  | 18  | 75    | 0.85 | 0  | 0    | 0     | 2  | 8.33  | 1.79  | 4  | 16.67 | 4.7   | 1 | 1 | 1 | 1 |
| GO:0008147 | 1   | 1   | 100   | 1.13 | 0  | 0    | 0     | 0  | 0     | 0     | 0  | 0     | 0     | 1 | 1 | 1 | 1 |
| GO:0008151 | 301 | 266 | 88.37 | 1    | 9  | 2.99 | 0.86  | 21 | 6.98  | 1.5   | 5  | 1.66  | 0.47  | 1 | 1 | 1 | 1 |
| GO:0008152 | 577 | 504 | 87.35 | 0.99 | 14 | 2.43 | 0.69  | 40 | 6.93  | 1.49  | 19 | 3.29  | 0.93  | 1 | 1 | 1 | 1 |
| GO:0008154 | 3   | 2   | 66.67 | 0.75 | 0  | 0    | 0     | 1  | 33.33 | 7.18  | 0  | 0     | 0     | 1 | 1 | 1 | 1 |
| GO:0008166 | 8   | 8   | 100   | 1.13 | 0  | 0    | 0     | 0  | 0     | 0     | 0  | 0     | 0     | 1 | 1 | 1 | 1 |
| GO:0008168 | 63  | 57  | 90.48 | 1.02 | 2  | 3.17 | 0.91  | 3  | 4.76  | 1.03  | 1  | 1.59  | 0.45  | 1 | 1 | 1 | 1 |
| GO:0008169 | 3   | 3   | 100   | 1.13 | 0  | 0    | 0     | 0  | 0     | 0     | 0  | 0     | 0     | 1 | 1 | 1 | 1 |
| GO:0008170 | 17  | 16  | 94.12 | 1.07 | 0  | 0    | 0     | 1  | 5.88  | 1.27  | 0  | 0     | 0     | 1 | 1 | 1 | 1 |
| GO:0008171 | 5   | 5   | 100   | 1.13 | 0  | 0    | 0     | 0  | 0     | 0     | 0  | 0     | 0     | 1 | 1 | 1 | 1 |
| GO:0008172 | 3   | 3   | 100   | 1.13 | 0  | 0    | 0     | 0  | 0     | 0     | 0  | 0     | 0     | 1 | 1 | 1 | 1 |
| GO:0008173 | 6   | 6   | 100   | 1.13 | 0  | 0    | 0     | 0  | 0     | 0     | 0  | 0     | 0     | 1 | 1 | 1 | 1 |
| GO:0008174 | 3   | 3   | 100   | 1.13 | 0  | 0    | 0     | 0  | 0     | 0     | 0  | 0     | 0     | 1 | 1 | 1 | 1 |
| GO:0008175 | 3   | 3   | 100   | 1.13 | 0  | 0    | 0     | 0  | 0     | 0     | 0  | 0     | 0     | 1 | 1 | 1 | 1 |
| GO:0008177 | 4   | 4   | 100   | 1.13 | 0  | 0    | 0     | 0  | 0     | 0     | 0  | 0     | 0     | 1 | 1 | 1 | 1 |
| GO:0008180 | 2   | 2   | 100   | 1.13 | 0  | 0    | 0     | 0  | 0     | 0     | 0  | 0     | 0     | 1 | 1 | 1 | 1 |
| GO:0008181 | 42  | 38  | 90.48 | 1.02 | 1  | 2.38 | 0.68  | 1  | 2.38  | 0.51  | 2  | 4.76  | 1.34  | 1 | 1 | 1 | 1 |

|            |     |     |       |      |    |       |      |    |       |      |   |       |       |   |   |             |   |
|------------|-----|-----|-------|------|----|-------|------|----|-------|------|---|-------|-------|---|---|-------------|---|
| GO:0008184 | 2   | 2   | 100   | 1.13 | 0  | 0     | 0    | 0  | 0     | 0    | 0 | 0     | 1     | 1 | 1 | 1           |   |
| GO:0008186 | 4   | 3   | 75    | 0.85 | 0  | 0     | 0    | 0  | 0     | 0    | 1 | 25    | 7.06  | 1 | 1 | 1           | 1 |
| GO:0008187 | 3   | 2   | 66.67 | 0.75 | 0  | 0     | 0    | 0  | 0     | 0    | 1 | 33.33 | 9.41  | 1 | 1 | 1           | 1 |
| GO:0008189 | 14  | 13  | 92.86 | 1.05 | 0  | 0     | 0    | 1  | 7.14  | 1.54 | 0 | 0     | 0     | 1 | 1 | 1           | 1 |
| GO:0008191 | 4   | 4   | 100   | 1.13 | 0  | 0     | 0    | 0  | 0     | 0    | 0 | 0     | 0     | 1 | 1 | 1           | 1 |
| GO:0008192 | 1   | 1   | 100   | 1.13 | 0  | 0     | 0    | 0  | 0     | 0    | 0 | 0     | 0     | 1 | 1 | 1           | 1 |
| GO:0008193 | 4   | 4   | 100   | 1.13 | 0  | 0     | 0    | 0  | 0     | 0    | 0 | 0     | 0     | 1 | 1 | 1           | 1 |
| GO:0008195 | 2   | 2   | 100   | 1.13 | 0  | 0     | 0    | 0  | 0     | 0    | 0 | 0     | 0     | 1 | 1 | 1           | 1 |
| GO:0008198 | 3   | 3   | 100   | 1.13 | 0  | 0     | 0    | 0  | 0     | 0    | 0 | 0     | 0     | 1 | 1 | 1           | 1 |
| GO:0008199 | 16  | 13  | 81.25 | 0.92 | 0  | 0     | 0    | 2  | 12.5  | 2.69 | 1 | 6.25  | 1.76  | 1 | 1 | 1           | 1 |
| GO:0008200 | 2   | 2   | 100   | 1.13 | 0  | 0     | 0    | 0  | 0     | 0    | 0 | 0     | 0     | 1 | 1 | 1           | 1 |
| GO:0008201 | 74  | 59  | 79.73 | 0.9  | 1  | 1.35  | 0.39 | 12 | 16.22 | 3.49 | 2 | 2.7   | 0.76  | 1 | 1 | 0.957753773 | 1 |
| GO:0008202 | 19  | 11  | 57.89 | 0.66 | 1  | 5.26  | 1.51 | 3  | 15.79 | 3.4  | 4 | 21.05 | 5.94  | 1 | 1 | 1           | 1 |
| GO:0008203 | 33  | 30  | 90.91 | 1.03 | 0  | 0     | 0    | 3  | 9.09  | 1.96 | 0 | 0     | 0     | 1 | 1 | 1           | 1 |
| GO:0008206 | 3   | 1   | 33.33 | 0.38 | 0  | 0     | 0    | 0  | 0     | 0    | 2 | 66.67 | 18.82 | 1 | 1 | 1           | 1 |
| GO:0008209 | 2   | 0   | 0     | 0    | 0  | 0     | 0    | 0  | 0     | 0    | 2 | 100   | 28.22 | 1 | 1 | 1           | 1 |
| GO:0008212 | 2   | 2   | 100   | 1.13 | 0  | 0     | 0    | 0  | 0     | 0    | 0 | 0     | 0     | 1 | 1 | 1           | 1 |
| GO:0008215 | 4   | 4   | 100   | 1.13 | 0  | 0     | 0    | 0  | 0     | 0    | 0 | 0     | 0     | 1 | 1 | 1           | 1 |
| GO:0008217 | 19  | 16  | 84.21 | 0.95 | 2  | 10.53 | 3.01 | 0  | 0     | 0    | 1 | 5.26  | 1.49  | 1 | 1 | 1           | 1 |
| GO:0008219 | 5   | 5   | 100   | 1.13 | 0  | 0     | 0    | 0  | 0     | 0    | 0 | 0     | 0     | 1 | 1 | 1           | 1 |
| GO:0008220 | 5   | 5   | 100   | 1.13 | 0  | 0     | 0    | 0  | 0     | 0    | 0 | 0     | 0     | 1 | 1 | 1           | 1 |
| GO:0008222 | 22  | 19  | 86.36 | 0.98 | 2  | 9.09  | 2.6  | 0  | 0     | 0    | 1 | 4.55  | 1.28  | 1 | 1 | 1           | 1 |
| GO:0008228 | 1   | 1   | 100   | 1.13 | 0  | 0     | 0    | 0  | 0     | 0    | 0 | 0     | 0     | 1 | 1 | 1           | 1 |
| GO:0008233 | 259 | 222 | 85.71 | 0.97 | 13 | 5.02  | 1.44 | 17 | 6.56  | 1.41 | 7 | 2.7   | 0.76  | 1 | 1 | 1           | 1 |
| GO:0008234 | 120 | 112 | 93.33 | 1.06 | 0  | 0     | 0    | 4  | 3.33  | 0.72 | 4 | 3.33  | 0.94  | 1 | 1 | 1           | 1 |
| GO:0008235 | 18  | 17  | 94.44 | 1.07 | 1  | 5.56  | 1.59 | 0  | 0     | 0    | 0 | 0     | 0     | 1 | 1 | 1           | 1 |
| GO:0008236 | 22  | 22  | 100   | 1.13 | 0  | 0     | 0    | 0  | 0     | 0    | 0 | 0     | 0     | 1 | 1 | 1           | 1 |
| GO:0008237 | 135 | 105 | 77.78 | 0.88 | 11 | 8.15  | 2.33 | 16 | 11.85 | 2.55 | 3 | 2.22  | 0.63  | 1 | 1 | 1           | 1 |
| GO:0008238 | 3   | 3   | 100   | 1.13 | 0  | 0     | 0    | 0  | 0     | 0    | 0 | 0     | 0     | 1 | 1 | 1           | 1 |
| GO:0008239 | 5   | 5   | 100   | 1.13 | 0  | 0     | 0    | 0  | 0     | 0    | 0 | 0     | 0     | 1 | 1 | 1           | 1 |
| GO:0008243 | 2   | 2   | 100   | 1.13 | 0  | 0     | 0    | 0  | 0     | 0    | 0 | 0     | 0     | 1 | 1 | 1           | 1 |
| GO:0008246 | 50  | 43  | 86    | 0.97 | 1  | 2     | 0.57 | 2  | 4     | 0.86 | 4 | 8     | 2.26  | 1 | 1 | 1           | 1 |
| GO:0008247 | 5   | 3   | 60    | 0.68 | 0  | 0     | 0    | 0  | 0     | 0    | 2 | 40    | 11.29 | 1 | 1 | 1           | 1 |
| GO:0008248 | 108 | 103 | 95.37 | 1.08 | 2  | 1.85  | 0.53 | 2  | 1.85  | 0.4  | 1 | 0.93  | 0.26  | 1 | 1 | 1           | 1 |
| GO:0008249 | 1   | 1   | 100   | 1.13 | 0  | 0     | 0    | 0  | 0     | 0    | 0 | 0     | 0     | 1 | 1 | 1           | 1 |
| GO:0008250 | 8   | 8   | 100   | 1.13 | 0  | 0     | 0    | 0  | 0     | 0    | 0 | 0     | 0     | 1 | 1 | 1           | 1 |
| GO:0008251 | 2   | 2   | 100   | 1.13 | 0  | 0     | 0    | 0  | 0     | 0    | 0 | 0     | 0     | 1 | 1 | 1           | 1 |
| GO:0008253 | 2   | 2   | 100   | 1.13 | 0  | 0     | 0    | 0  | 0     | 0    | 0 | 0     | 0     | 1 | 1 | 1           | 1 |
| GO:0008260 | 4   | 4   | 100   | 1.13 | 0  | 0     | 0    | 0  | 0     | 0    | 0 | 0     | 0     | 1 | 1 | 1           | 1 |
| GO:0008264 | 1   | 1   | 100   | 1.13 | 0  | 0     | 0    | 0  | 0     | 0    | 0 | 0     | 0     | 1 | 1 | 1           | 1 |
| GO:0008266 | 3   | 2   | 66.67 | 0.75 | 0  | 0     | 0    | 0  | 0     | 0    | 1 | 33.33 | 9.41  | 1 | 1 | 1           | 1 |

|            |     |     |       |      |    |       |       |    |       |      |   |       |      |   |   |   |   |
|------------|-----|-----|-------|------|----|-------|-------|----|-------|------|---|-------|------|---|---|---|---|
| GO:0008270 | 523 | 464 | 88.72 | 1    | 23 | 4.4   | 1.26  | 30 | 5.74  | 1.23 | 6 | 1.15  | 0.32 | 1 | 1 | 1 | 1 |
| GO:0008271 | 5   | 2   | 40    | 0.45 | 0  | 0     | 0     | 2  | 40    | 8.61 | 1 | 20    | 5.64 | 1 | 1 | 1 | 1 |
| GO:0008272 | 8   | 5   | 62.5  | 0.71 | 0  | 0     | 0     | 2  | 25    | 5.38 | 1 | 12.5  | 3.53 | 1 | 1 | 1 | 1 |
| GO:0008276 | 11  | 11  | 100   | 1.13 | 0  | 0     | 0     | 0  | 0     | 0    | 0 | 0     | 0    | 1 | 1 | 1 | 1 |
| GO:0008277 | 14  | 14  | 100   | 1.13 | 0  | 0     | 0     | 0  | 0     | 0    | 0 | 0     | 0    | 1 | 1 | 1 | 1 |
| GO:0008279 | 3   | 3   | 100   | 1.13 | 0  | 0     | 0     | 0  | 0     | 0    | 0 | 0     | 0    | 1 | 1 | 1 | 1 |
| GO:0008283 | 139 | 125 | 89.93 | 1.02 | 5  | 3.6   | 1.03  | 5  | 3.6   | 0.77 | 4 | 2.88  | 0.81 | 1 | 1 | 1 | 1 |
| GO:0008284 | 56  | 51  | 91.07 | 1.03 | 1  | 1.79  | 0.51  | 3  | 5.36  | 1.15 | 1 | 1.79  | 0.5  | 1 | 1 | 1 | 1 |
| GO:0008285 | 50  | 48  | 96    | 1.09 | 1  | 2     | 0.57  | 1  | 2     | 0.43 | 0 | 0     | 0    | 1 | 1 | 1 | 1 |
| GO:0008286 | 9   | 9   | 100   | 1.13 | 0  | 0     | 0     | 0  | 0     | 0    | 0 | 0     | 0    | 1 | 1 | 1 | 1 |
| GO:0008287 | 38  | 35  | 92.11 | 1.04 | 0  | 0     | 0     | 2  | 5.26  | 1.13 | 1 | 2.63  | 0.74 | 1 | 1 | 1 | 1 |
| GO:0008289 | 75  | 64  | 85.33 | 0.97 | 2  | 2.67  | 0.76  | 7  | 9.33  | 2.01 | 2 | 2.67  | 0.75 | 1 | 1 | 1 | 1 |
| GO:0008290 | 12  | 11  | 91.67 | 1.04 | 0  | 0     | 0     | 0  | 0     | 0    | 1 | 8.33  | 2.35 | 1 | 1 | 1 | 1 |
| GO:0008295 | 1   | 1   | 100   | 1.13 | 0  | 0     | 0     | 0  | 0     | 0    | 0 | 0     | 0    | 1 | 1 | 1 | 1 |
| GO:0008298 | 5   | 5   | 100   | 1.13 | 0  | 0     | 0     | 0  | 0     | 0    | 0 | 0     | 0    | 1 | 1 | 1 | 1 |
| GO:0008299 | 12  | 11  | 91.67 | 1.04 | 0  | 0     | 0     | 0  | 0     | 0    | 1 | 8.33  | 2.35 | 1 | 1 | 1 | 1 |
| GO:0008300 | 3   | 3   | 100   | 1.13 | 0  | 0     | 0     | 0  | 0     | 0    | 0 | 0     | 0    | 1 | 1 | 1 | 1 |
| GO:0008301 | 1   | 1   | 100   | 1.13 | 0  | 0     | 0     | 0  | 0     | 0    | 0 | 0     | 0    | 1 | 1 | 1 | 1 |
| GO:0008303 | 3   | 2   | 66.67 | 0.75 | 0  | 0     | 0     | 0  | 0     | 0    | 1 | 33.33 | 9.41 | 1 | 1 | 1 | 1 |
| GO:0008304 | 14  | 13  | 92.86 | 1.05 | 1  | 7.14  | 2.05  | 0  | 0     | 0    | 0 | 0     | 0    | 1 | 1 | 1 | 1 |
| GO:0008305 | 47  | 34  | 72.34 | 0.82 | 3  | 6.38  | 1.83  | 5  | 10.64 | 2.29 | 5 | 10.64 | 3    | 1 | 1 | 1 | 1 |
| GO:0008307 | 22  | 17  | 77.27 | 0.87 | 4  | 18.18 | 5.21  | 0  | 0     | 0    | 1 | 4.55  | 1.28 | 1 | 1 | 1 | 1 |
| GO:0008308 | 19  | 19  | 100   | 1.13 | 0  | 0     | 0     | 0  | 0     | 0    | 0 | 0     | 0    | 1 | 1 | 1 | 1 |
| GO:0008312 | 5   | 5   | 100   | 1.13 | 0  | 0     | 0     | 0  | 0     | 0    | 0 | 0     | 0    | 1 | 1 | 1 | 1 |
| GO:0008318 | 22  | 20  | 90.91 | 1.03 | 0  | 0     | 0     | 2  | 9.09  | 1.96 | 0 | 0     | 0    | 1 | 1 | 1 | 1 |
| GO:0008319 | 8   | 5   | 62.5  | 0.71 | 3  | 37.5  | 10.74 | 0  | 0     | 0    | 0 | 0     | 0    | 1 | 1 | 1 | 1 |
| GO:0008320 | 16  | 16  | 100   | 1.13 | 0  | 0     | 0     | 0  | 0     | 0    | 0 | 0     | 0    | 1 | 1 | 1 | 1 |
| GO:0008321 | 1   | 1   | 100   | 1.13 | 0  | 0     | 0     | 0  | 0     | 0    | 0 | 0     | 0    | 1 | 1 | 1 | 1 |
| GO:0008324 | 17  | 17  | 100   | 1.13 | 0  | 0     | 0     | 0  | 0     | 0    | 0 | 0     | 0    | 1 | 1 | 1 | 1 |
| GO:0008326 | 2   | 2   | 100   | 1.13 | 0  | 0     | 0     | 0  | 0     | 0    | 0 | 0     | 0    | 1 | 1 | 1 | 1 |
| GO:0008327 | 1   | 1   | 100   | 1.13 | 0  | 0     | 0     | 0  | 0     | 0    | 0 | 0     | 0    | 1 | 1 | 1 | 1 |
| GO:0008328 | 1   | 1   | 100   | 1.13 | 0  | 0     | 0     | 0  | 0     | 0    | 0 | 0     | 0    | 1 | 1 | 1 | 1 |
| GO:0008332 | 2   | 2   | 100   | 1.13 | 0  | 0     | 0     | 0  | 0     | 0    | 0 | 0     | 0    | 1 | 1 | 1 | 1 |
| GO:0008333 | 2   | 2   | 100   | 1.13 | 0  | 0     | 0     | 0  | 0     | 0    | 0 | 0     | 0    | 1 | 1 | 1 | 1 |
| GO:0008336 | 1   | 0   | 0     | 0    | 1  | 100   | 28.63 | 0  | 0     | 0    | 0 | 0     | 0    | 1 | 1 | 1 | 1 |
| GO:0008338 | 17  | 17  | 100   | 1.13 | 0  | 0     | 0     | 0  | 0     | 0    | 0 | 0     | 0    | 1 | 1 | 1 | 1 |
| GO:0008339 | 17  | 17  | 100   | 1.13 | 0  | 0     | 0     | 0  | 0     | 0    | 0 | 0     | 0    | 1 | 1 | 1 | 1 |
| GO:0008340 | 3   | 2   | 66.67 | 0.75 | 0  | 0     | 0     | 1  | 33.33 | 7.18 | 0 | 0     | 0    | 1 | 1 | 1 | 1 |
| GO:0008344 | 7   | 7   | 100   | 1.13 | 0  | 0     | 0     | 0  | 0     | 0    | 0 | 0     | 0    | 1 | 1 | 1 | 1 |
| GO:0008347 | 1   | 1   | 100   | 1.13 | 0  | 0     | 0     | 0  | 0     | 0    | 0 | 0     | 0    | 1 | 1 | 1 | 1 |
| GO:0008349 | 17  | 17  | 100   | 1.13 | 0  | 0     | 0     | 0  | 0     | 0    | 0 | 0     | 0    | 1 | 1 | 1 | 1 |

|            |     |     |       |      |   |       |       |    |       |      |   |      |      |   |             |   |   |
|------------|-----|-----|-------|------|---|-------|-------|----|-------|------|---|------|------|---|-------------|---|---|
| GO:0008352 | 1   | 1   | 100   | 1.13 | 0 | 0     | 0     | 0  | 0     | 0    | 0 | 0    | 0    | 1 | 1           | 1 | 1 |
| GO:0008353 | 1   | 1   | 100   | 1.13 | 0 | 0     | 0     | 0  | 0     | 0    | 0 | 0    | 0    | 1 | 1           | 1 | 1 |
| GO:0008354 | 2   | 2   | 100   | 1.13 | 0 | 0     | 0     | 0  | 0     | 0    | 0 | 0    | 0    | 1 | 1           | 1 | 1 |
| GO:0008356 | 1   | 1   | 100   | 1.13 | 0 | 0     | 0     | 0  | 0     | 0    | 0 | 0    | 0    | 1 | 1           | 1 | 1 |
| GO:0008360 | 16  | 15  | 93.75 | 1.06 | 0 | 0     | 0     | 0  | 0     | 0    | 1 | 6.25 | 1.76 | 1 | 1           | 1 | 1 |
| GO:0008361 | 2   | 2   | 100   | 1.13 | 0 | 0     | 0     | 0  | 0     | 0    | 0 | 0    | 0    | 1 | 1           | 1 | 1 |
| GO:0008366 | 4   | 1   | 25    | 0.28 | 3 | 75    | 21.47 | 0  | 0     | 0    | 0 | 0    | 0    | 1 | 0.683729195 | 1 | 1 |
| GO:0008367 | 1   | 1   | 100   | 1.13 | 0 | 0     | 0     | 0  | 0     | 0    | 0 | 0    | 0    | 1 | 1           | 1 | 1 |
| GO:0008372 | 236 | 217 | 91.95 | 1.04 | 2 | 0.85  | 0.24  | 10 | 4.24  | 0.91 | 7 | 2.97 | 0.84 | 1 | 1           | 1 | 1 |
| GO:0008373 | 25  | 25  | 100   | 1.13 | 0 | 0     | 0     | 0  | 0     | 0    | 0 | 0    | 0    | 1 | 1           | 1 | 1 |
| GO:0008374 | 2   | 2   | 100   | 1.13 | 0 | 0     | 0     | 0  | 0     | 0    | 0 | 0    | 0    | 1 | 1           | 1 | 1 |
| GO:0008375 | 7   | 7   | 100   | 1.13 | 0 | 0     | 0     | 0  | 0     | 0    | 0 | 0    | 0    | 1 | 1           | 1 | 1 |
| GO:0008376 | 6   | 6   | 100   | 1.13 | 0 | 0     | 0     | 0  | 0     | 0    | 0 | 0    | 0    | 1 | 1           | 1 | 1 |
| GO:0008378 | 16  | 16  | 100   | 1.13 | 0 | 0     | 0     | 0  | 0     | 0    | 0 | 0    | 0    | 1 | 1           | 1 | 1 |
| GO:0008379 | 5   | 5   | 100   | 1.13 | 0 | 0     | 0     | 0  | 0     | 0    | 0 | 0    | 0    | 1 | 1           | 1 | 1 |
| GO:0008380 | 5   | 5   | 100   | 1.13 | 0 | 0     | 0     | 0  | 0     | 0    | 0 | 0    | 0    | 1 | 1           | 1 | 1 |
| GO:0008382 | 1   | 1   | 100   | 1.13 | 0 | 0     | 0     | 0  | 0     | 0    | 0 | 0    | 0    | 1 | 1           | 1 | 1 |
| GO:0008383 | 1   | 1   | 100   | 1.13 | 0 | 0     | 0     | 0  | 0     | 0    | 0 | 0    | 0    | 1 | 1           | 1 | 1 |
| GO:0008384 | 19  | 18  | 94.74 | 1.07 | 0 | 0     | 0     | 1  | 5.26  | 1.13 | 0 | 0    | 0    | 1 | 1           | 1 | 1 |
| GO:0008395 | 2   | 2   | 100   | 1.13 | 0 | 0     | 0     | 0  | 0     | 0    | 0 | 0    | 0    | 1 | 1           | 1 | 1 |
| GO:0008398 | 2   | 2   | 100   | 1.13 | 0 | 0     | 0     | 0  | 0     | 0    | 0 | 0    | 0    | 1 | 1           | 1 | 1 |
| GO:0008408 | 19  | 19  | 100   | 1.13 | 0 | 0     | 0     | 0  | 0     | 0    | 0 | 0    | 0    | 1 | 1           | 1 | 1 |
| GO:0008409 | 4   | 4   | 100   | 1.13 | 0 | 0     | 0     | 0  | 0     | 0    | 0 | 0    | 0    | 1 | 1           | 1 | 1 |
| GO:0008410 | 4   | 4   | 100   | 1.13 | 0 | 0     | 0     | 0  | 0     | 0    | 0 | 0    | 0    | 1 | 1           | 1 | 1 |
| GO:0008413 | 3   | 3   | 100   | 1.13 | 0 | 0     | 0     | 0  | 0     | 0    | 0 | 0    | 0    | 1 | 1           | 1 | 1 |
| GO:0008415 | 85  | 80  | 94.12 | 1.07 | 3 | 3.53  | 1.01  | 1  | 1.18  | 0.25 | 1 | 1.18 | 0.33 | 1 | 1           | 1 | 1 |
| GO:0008417 | 8   | 8   | 100   | 1.13 | 0 | 0     | 0     | 0  | 0     | 0    | 0 | 0    | 0    | 1 | 1           | 1 | 1 |
| GO:0008418 | 3   | 2   | 66.67 | 0.75 | 0 | 0     | 0     | 1  | 33.33 | 7.18 | 0 | 0    | 0    | 1 | 1           | 1 | 1 |
| GO:0008419 | 2   | 2   | 100   | 1.13 | 0 | 0     | 0     | 0  | 0     | 0    | 0 | 0    | 0    | 1 | 1           | 1 | 1 |
| GO:0008420 | 13  | 12  | 92.31 | 1.05 | 1 | 7.69  | 2.2   | 0  | 0     | 0    | 0 | 0    | 0    | 1 | 1           | 1 | 1 |
| GO:0008423 | 3   | 3   | 100   | 1.13 | 0 | 0     | 0     | 0  | 0     | 0    | 0 | 0    | 0    | 1 | 1           | 1 | 1 |
| GO:0008425 | 3   | 3   | 100   | 1.13 | 0 | 0     | 0     | 0  | 0     | 0    | 0 | 0    | 0    | 1 | 1           | 1 | 1 |
| GO:0008426 | 1   | 1   | 100   | 1.13 | 0 | 0     | 0     | 0  | 0     | 0    | 0 | 0    | 0    | 1 | 1           | 1 | 1 |
| GO:0008429 | 3   | 3   | 100   | 1.13 | 0 | 0     | 0     | 0  | 0     | 0    | 0 | 0    | 0    | 1 | 1           | 1 | 1 |
| GO:0008430 | 9   | 6   | 66.67 | 0.75 | 3 | 33.33 | 9.54  | 0  | 0     | 0    | 0 | 0    | 0    | 1 | 1           | 1 | 1 |
| GO:0008431 | 2   | 2   | 100   | 1.13 | 0 | 0     | 0     | 0  | 0     | 0    | 0 | 0    | 0    | 1 | 1           | 1 | 1 |
| GO:0008433 | 5   | 4   | 80    | 0.91 | 1 | 20    | 5.73  | 0  | 0     | 0    | 0 | 0    | 0    | 1 | 1           | 1 | 1 |
| GO:0008435 | 4   | 4   | 100   | 1.13 | 0 | 0     | 0     | 0  | 0     | 0    | 0 | 0    | 0    | 1 | 1           | 1 | 1 |
| GO:0008436 | 20  | 19  | 95    | 1.08 | 0 | 0     | 0     | 0  | 0     | 0    | 1 | 5    | 1.41 | 1 | 1           | 1 | 1 |
| GO:0008440 | 1   | 1   | 100   | 1.13 | 0 | 0     | 0     | 0  | 0     | 0    | 0 | 0    | 0    | 1 | 1           | 1 | 1 |
| GO:0008441 | 1   | 1   | 100   | 1.13 | 0 | 0     | 0     | 0  | 0     | 0    | 0 | 0    | 0    | 1 | 1           | 1 | 1 |

|            |    |    |       |      |   |       |       |   |      |      |     |       |   |   |   |   |   |
|------------|----|----|-------|------|---|-------|-------|---|------|------|-----|-------|---|---|---|---|---|
| GO:0008442 | 1  | 1  | 100   | 1.13 | 0 | 0     | 0     | 0 | 0    | 0    | 0   | 0     | 0 | 1 | 1 | 1 | 1 |
| GO:0008443 | 19 | 19 | 100   | 1.13 | 0 | 0     | 0     | 0 | 0    | 0    | 0   | 0     | 0 | 1 | 1 | 1 | 1 |
| GO:0008445 | 2  | 0  | 0     | 0    | 0 | 0     | 0     | 0 | 0    | 2    | 100 | 28.22 | 0 | 1 | 1 | 1 | 1 |
| GO:0008448 | 4  | 4  | 100   | 1.13 | 0 | 0     | 0     | 0 | 0    | 0    | 0   | 0     | 0 | 1 | 1 | 1 | 1 |
| GO:0008449 | 5  | 5  | 100   | 1.13 | 0 | 0     | 0     | 0 | 0    | 0    | 0   | 0     | 0 | 1 | 1 | 1 | 1 |
| GO:0008450 | 6  | 6  | 100   | 1.13 | 0 | 0     | 0     | 0 | 0    | 0    | 0   | 0     | 0 | 1 | 1 | 1 | 1 |
| GO:0008451 | 1  | 1  | 100   | 1.13 | 0 | 0     | 0     | 0 | 0    | 0    | 0   | 0     | 0 | 1 | 1 | 1 | 1 |
| GO:0008453 | 1  | 0  | 0     | 0    | 1 | 100   | 28.63 | 0 | 0    | 0    | 0   | 0     | 0 | 1 | 1 | 1 | 1 |
| GO:0008455 | 3  | 3  | 100   | 1.13 | 0 | 0     | 0     | 0 | 0    | 0    | 0   | 0     | 0 | 1 | 1 | 1 | 1 |
| GO:0008456 | 1  | 1  | 100   | 1.13 | 0 | 0     | 0     | 0 | 0    | 0    | 0   | 0     | 0 | 1 | 1 | 1 | 1 |
| GO:0008458 | 1  | 1  | 100   | 1.13 | 0 | 0     | 0     | 0 | 0    | 0    | 0   | 0     | 0 | 1 | 1 | 1 | 1 |
| GO:0008460 | 3  | 3  | 100   | 1.13 | 0 | 0     | 0     | 0 | 0    | 0    | 0   | 0     | 0 | 1 | 1 | 1 | 1 |
| GO:0008462 | 10 | 10 | 100   | 1.13 | 0 | 0     | 0     | 0 | 0    | 0    | 0   | 0     | 0 | 1 | 1 | 1 | 1 |
| GO:0008464 | 2  | 2  | 100   | 1.13 | 0 | 0     | 0     | 0 | 0    | 0    | 0   | 0     | 0 | 1 | 1 | 1 | 1 |
| GO:0008467 | 3  | 3  | 100   | 1.13 | 0 | 0     | 0     | 0 | 0    | 0    | 0   | 0     | 0 | 1 | 1 | 1 | 1 |
| GO:0008474 | 5  | 5  | 100   | 1.13 | 0 | 0     | 0     | 0 | 0    | 0    | 0   | 0     | 0 | 1 | 1 | 1 | 1 |
| GO:0008475 | 5  | 5  | 100   | 1.13 | 0 | 0     | 0     | 0 | 0    | 0    | 0   | 0     | 0 | 1 | 1 | 1 | 1 |
| GO:0008476 | 1  | 1  | 100   | 1.13 | 0 | 0     | 0     | 0 | 0    | 0    | 0   | 0     | 0 | 1 | 1 | 1 | 1 |
| GO:0008478 | 2  | 2  | 100   | 1.13 | 0 | 0     | 0     | 0 | 0    | 0    | 0   | 0     | 0 | 1 | 1 | 1 | 1 |
| GO:0008479 | 4  | 4  | 100   | 1.13 | 0 | 0     | 0     | 0 | 0    | 0    | 0   | 0     | 0 | 1 | 1 | 1 | 1 |
| GO:0008481 | 2  | 2  | 100   | 1.13 | 0 | 0     | 0     | 0 | 0    | 0    | 0   | 0     | 0 | 1 | 1 | 1 | 1 |
| GO:0008482 | 1  | 1  | 100   | 1.13 | 0 | 0     | 0     | 0 | 0    | 0    | 0   | 0     | 0 | 1 | 1 | 1 | 1 |
| GO:0008483 | 37 | 35 | 94.59 | 1.07 | 2 | 5.41  | 1.55  | 0 | 0    | 0    | 0   | 0     | 0 | 1 | 1 | 1 | 1 |
| GO:0008484 | 22 | 18 | 81.82 | 0.93 | 3 | 13.64 | 3.9   | 1 | 4.55 | 0.98 | 0   | 0     | 0 | 1 | 1 | 1 | 1 |
| GO:0008486 | 1  | 1  | 100   | 1.13 | 0 | 0     | 0     | 0 | 0    | 0    | 0   | 0     | 0 | 1 | 1 | 1 | 1 |
| GO:0008488 | 1  | 1  | 100   | 1.13 | 0 | 0     | 0     | 0 | 0    | 0    | 0   | 0     | 0 | 1 | 1 | 1 | 1 |
| GO:0008494 | 1  | 1  | 100   | 1.13 | 0 | 0     | 0     | 0 | 0    | 0    | 0   | 0     | 0 | 1 | 1 | 1 | 1 |
| GO:0008495 | 3  | 3  | 100   | 1.13 | 0 | 0     | 0     | 0 | 0    | 0    | 0   | 0     | 0 | 1 | 1 | 1 | 1 |
| GO:0008497 | 1  | 1  | 100   | 1.13 | 0 | 0     | 0     | 0 | 0    | 0    | 0   | 0     | 0 | 1 | 1 | 1 | 1 |
| GO:0008499 | 3  | 3  | 100   | 1.13 | 0 | 0     | 0     | 0 | 0    | 0    | 0   | 0     | 0 | 1 | 1 | 1 | 1 |
| GO:0008501 | 3  | 3  | 100   | 1.13 | 0 | 0     | 0     | 0 | 0    | 0    | 0   | 0     | 0 | 1 | 1 | 1 | 1 |
| GO:0008504 | 3  | 3  | 100   | 1.13 | 0 | 0     | 0     | 0 | 0    | 0    | 0   | 0     | 0 | 1 | 1 | 1 | 1 |
| GO:0008507 | 1  | 1  | 100   | 1.13 | 0 | 0     | 0     | 0 | 0    | 0    | 0   | 0     | 0 | 1 | 1 | 1 | 1 |
| GO:0008508 | 8  | 8  | 100   | 1.13 | 0 | 0     | 0     | 0 | 0    | 0    | 0   | 0     | 0 | 1 | 1 | 1 | 1 |
| GO:0008510 | 1  | 1  | 100   | 1.13 | 0 | 0     | 0     | 0 | 0    | 0    | 0   | 0     | 0 | 1 | 1 | 1 | 1 |
| GO:0008514 | 2  | 2  | 100   | 1.13 | 0 | 0     | 0     | 0 | 0    | 0    | 0   | 0     | 0 | 1 | 1 | 1 | 1 |
| GO:0008517 | 1  | 1  | 100   | 1.13 | 0 | 0     | 0     | 0 | 0    | 0    | 0   | 0     | 0 | 1 | 1 | 1 | 1 |
| GO:0008518 | 5  | 5  | 100   | 1.13 | 0 | 0     | 0     | 0 | 0    | 0    | 0   | 0     | 0 | 1 | 1 | 1 | 1 |
| GO:0008519 | 1  | 1  | 100   | 1.13 | 0 | 0     | 0     | 0 | 0    | 0    | 0   | 0     | 0 | 1 | 1 | 1 | 1 |
| GO:0008521 | 3  | 3  | 100   | 1.13 | 0 | 0     | 0     | 0 | 0    | 0    | 0   | 0     | 0 | 1 | 1 | 1 | 1 |
| GO:0008526 | 1  | 1  | 100   | 1.13 | 0 | 0     | 0     | 0 | 0    | 0    | 0   | 0     | 0 | 1 | 1 | 1 | 1 |



|            |     |     |       |      |   |       |       |   |       |       |   |       |       |          |   |   |   |
|------------|-----|-----|-------|------|---|-------|-------|---|-------|-------|---|-------|-------|----------|---|---|---|
| GO:0008531 | 3   | 3   | 100   | 1.13 | 0 | 0     | 0     | 0 | 0     | 0     | 0 | 0     | 0     | 1        | 1 | 1 | 1 |
| GO:0008532 | 1   | 1   | 100   | 1.13 | 0 | 0     | 0     | 0 | 0     | 0     | 0 | 0     | 0     | 1        | 1 | 1 | 1 |
| GO:0008533 | 6   | 5   | 83.33 | 0.94 | 0 | 0     | 0     | 1 | 16.67 | 3.59  | 0 | 0     | 0     | 1        | 1 | 1 | 1 |
| GO:0008534 | 2   | 1   | 50    | 0.57 | 1 | 50    | 14.32 | 0 | 0     | 0     | 0 | 0     | 0     | 1        | 1 | 1 | 1 |
| GO:0008535 | 2   | 2   | 100   | 1.13 | 0 | 0     | 0     | 0 | 0     | 0     | 0 | 0     | 0     | 1        | 1 | 1 | 1 |
| GO:0008536 | 10  | 9   | 90    | 1.02 | 1 | 10    | 2.86  | 0 | 0     | 0     | 0 | 0     | 0     | 1        | 1 | 1 | 1 |
| GO:0008537 | 5   | 5   | 100   | 1.13 | 0 | 0     | 0     | 0 | 0     | 0     | 0 | 0     | 0     | 1        | 1 | 1 | 1 |
| GO:0008538 | 5   | 5   | 100   | 1.13 | 0 | 0     | 0     | 0 | 0     | 0     | 0 | 0     | 0     | 1        | 1 | 1 | 1 |
| GO:0008541 | 1   | 1   | 100   | 1.13 | 0 | 0     | 0     | 0 | 0     | 0     | 0 | 0     | 0     | 1        | 1 | 1 | 1 |
| GO:0008543 | 3   | 3   | 100   | 1.13 | 0 | 0     | 0     | 0 | 0     | 0     | 0 | 0     | 0     | 1        | 1 | 1 | 1 |
| GO:0008544 | 9   | 5   | 55.56 | 0.63 | 1 | 11.11 | 3.18  | 2 | 22.22 | 4.78  | 1 | 11.11 | 3.14  | 1        | 1 | 1 | 1 |
| GO:0008545 | 17  | 17  | 100   | 1.13 | 0 | 0     | 0     | 0 | 0     | 0     | 0 | 0     | 0     | 1        | 1 | 1 | 1 |
| GO:0008547 | 23  | 23  | 100   | 1.13 | 0 | 0     | 0     | 0 | 0     | 0     | 0 | 0     | 0     | 1        | 1 | 1 | 1 |
| GO:0008549 | 2   | 2   | 100   | 1.13 | 0 | 0     | 0     | 0 | 0     | 0     | 0 | 0     | 0     | 1        | 1 | 1 | 1 |
| GO:0008553 | 39  | 34  | 87.18 | 0.99 | 1 | 2.56  | 0.73  | 4 | 10.26 | 2.21  | 0 | 0     | 0     | 1        | 1 | 1 | 1 |
| GO:0008559 | 1   | 1   | 100   | 1.13 | 0 | 0     | 0     | 0 | 0     | 0     | 0 | 0     | 0     | 1        | 1 | 1 | 1 |
| GO:0008565 | 294 | 288 | 97.96 | 1.11 | 0 | 0     | 0     | 5 | 1.7   | 0.37  | 1 | 0.34  | 0.1   | 2.11E-07 | 1 | 1 | 1 |
| GO:0008568 | 1   | 1   | 100   | 1.13 | 0 | 0     | 0     | 0 | 0     | 0     | 0 | 0     | 0     | 1        | 1 | 1 | 1 |
| GO:0008569 | 3   | 3   | 100   | 1.13 | 0 | 0     | 0     | 0 | 0     | 0     | 0 | 0     | 0     | 1        | 1 | 1 | 1 |
| GO:0008575 | 1   | 0   | 0     | 0    | 0 | 0     | 0     | 1 | 100   | 21.53 | 0 | 0     | 0     | 1        | 1 | 1 | 1 |
| GO:0008577 | 1   | 1   | 100   | 1.13 | 0 | 0     | 0     | 0 | 0     | 0     | 0 | 0     | 0     | 1        | 1 | 1 | 1 |
| GO:0008580 | 3   | 3   | 100   | 1.13 | 0 | 0     | 0     | 0 | 0     | 0     | 0 | 0     | 0     | 1        | 1 | 1 | 1 |
| GO:0008583 | 4   | 4   | 100   | 1.13 | 0 | 0     | 0     | 0 | 0     | 0     | 0 | 0     | 0     | 1        | 1 | 1 | 1 |
| GO:0008584 | 3   | 3   | 100   | 1.13 | 0 | 0     | 0     | 0 | 0     | 0     | 0 | 0     | 0     | 1        | 1 | 1 | 1 |
| GO:0008593 | 1   | 1   | 100   | 1.13 | 0 | 0     | 0     | 0 | 0     | 0     | 0 | 0     | 0     | 1        | 1 | 1 | 1 |
| GO:0008599 | 1   | 1   | 100   | 1.13 | 0 | 0     | 0     | 0 | 0     | 0     | 0 | 0     | 0     | 1        | 1 | 1 | 1 |
| GO:0008600 | 2   | 2   | 100   | 1.13 | 0 | 0     | 0     | 0 | 0     | 0     | 0 | 0     | 0     | 1        | 1 | 1 | 1 |
| GO:0008601 | 22  | 21  | 95.45 | 1.08 | 0 | 0     | 0     | 0 | 0     | 0     | 1 | 4.55  | 1.28  | 1        | 1 | 1 | 1 |
| GO:0008602 | 17  | 17  | 100   | 1.13 | 0 | 0     | 0     | 0 | 0     | 0     | 0 | 0     | 0     | 1        | 1 | 1 | 1 |
| GO:0008603 | 33  | 30  | 90.91 | 1.03 | 0 | 0     | 0     | 2 | 6.06  | 1.3   | 1 | 3.03  | 0.86  | 1        | 1 | 1 | 1 |
| GO:0008604 | 17  | 17  | 100   | 1.13 | 0 | 0     | 0     | 0 | 0     | 0     | 0 | 0     | 0     | 1        | 1 | 1 | 1 |
| GO:0008605 | 19  | 19  | 100   | 1.13 | 0 | 0     | 0     | 0 | 0     | 0     | 0 | 0     | 0     | 1        | 1 | 1 | 1 |
| GO:0008606 | 18  | 18  | 100   | 1.13 | 0 | 0     | 0     | 0 | 0     | 0     | 0 | 0     | 0     | 1        | 1 | 1 | 1 |
| GO:0008607 | 20  | 20  | 100   | 1.13 | 0 | 0     | 0     | 0 | 0     | 0     | 0 | 0     | 0     | 1        | 1 | 1 | 1 |
| GO:0008609 | 2   | 2   | 100   | 1.13 | 0 | 0     | 0     | 0 | 0     | 0     | 0 | 0     | 0     | 1        | 1 | 1 | 1 |
| GO:0008610 | 10  | 10  | 100   | 1.13 | 0 | 0     | 0     | 0 | 0     | 0     | 0 | 0     | 0     | 1        | 1 | 1 | 1 |
| GO:0008611 | 4   | 4   | 100   | 1.13 | 0 | 0     | 0     | 0 | 0     | 0     | 0 | 0     | 0     | 1        | 1 | 1 | 1 |
| GO:0008612 | 2   | 0   | 0     | 0    | 0 | 0     | 0     | 1 | 50    | 10.76 | 1 | 50    | 14.11 | 1        | 1 | 1 | 1 |
| GO:0008615 | 1   | 1   | 100   | 1.13 | 0 | 0     | 0     | 0 | 0     | 0     | 0 | 0     | 0     | 1        | 1 | 1 | 1 |
| GO:0008616 | 1   | 1   | 100   | 1.13 | 0 | 0     | 0     | 0 | 0     | 0     | 0 | 0     | 0     | 1        | 1 | 1 | 1 |
| GO:0008617 | 1   | 1   | 100   | 1.13 | 0 | 0     | 0     | 0 | 0     | 0     | 0 | 0     | 0     | 1        | 1 | 1 | 1 |

|            |    |    |       |      |   |      |       |   |      |       |   |   |      |      |   |   |   |
|------------|----|----|-------|------|---|------|-------|---|------|-------|---|---|------|------|---|---|---|
| GO:0008624 | 7  | 7  | 100   | 1.13 | 0 | 0    | 0     | 0 | 0    | 0     | 0 | 0 | 0    | 1    | 1 | 1 | 1 |
| GO:0008625 | 14 | 14 | 100   | 1.13 | 0 | 0    | 0     | 0 | 0    | 0     | 0 | 0 | 0    | 1    | 1 | 1 | 1 |
| GO:0008628 | 1  | 1  | 100   | 1.13 | 0 | 0    | 0     | 0 | 0    | 0     | 0 | 0 | 0    | 1    | 1 | 1 | 1 |
| GO:0008629 | 8  | 8  | 100   | 1.13 | 0 | 0    | 0     | 0 | 0    | 0     | 0 | 0 | 0    | 1    | 1 | 1 | 1 |
| GO:0008630 | 2  | 2  | 100   | 1.13 | 0 | 0    | 0     | 0 | 0    | 0     | 0 | 0 | 0    | 1    | 1 | 1 | 1 |
| GO:0008631 | 2  | 2  | 100   | 1.13 | 0 | 0    | 0     | 0 | 0    | 0     | 0 | 0 | 0    | 1    | 1 | 1 | 1 |
| GO:0008632 | 8  | 8  | 100   | 1.13 | 0 | 0    | 0     | 0 | 0    | 0     | 0 | 0 | 0    | 1    | 1 | 1 | 1 |
| GO:0008635 | 4  | 4  | 100   | 1.13 | 0 | 0    | 0     | 0 | 0    | 0     | 0 | 0 | 0    | 1    | 1 | 1 | 1 |
| GO:0008637 | 6  | 6  | 100   | 1.13 | 0 | 0    | 0     | 0 | 0    | 0     | 0 | 0 | 0    | 1    | 1 | 1 | 1 |
| GO:0008640 | 3  | 3  | 100   | 1.13 | 0 | 0    | 0     | 0 | 0    | 0     | 0 | 0 | 0    | 1    | 1 | 1 | 1 |
| GO:0008642 | 10 | 10 | 100   | 1.13 | 0 | 0    | 0     | 0 | 0    | 0     | 0 | 0 | 0    | 1    | 1 | 1 | 1 |
| GO:0008643 | 34 | 30 | 88.24 | 1    | 2 | 5.88 | 1.68  | 0 | 0    | 0     | 0 | 2 | 5.88 | 1.66 | 1 | 1 | 1 |
| GO:0008649 | 7  | 7  | 100   | 1.13 | 0 | 0    | 0     | 0 | 0    | 0     | 0 | 0 | 0    | 1    | 1 | 1 | 1 |
| GO:0008650 | 3  | 3  | 100   | 1.13 | 0 | 0    | 0     | 0 | 0    | 0     | 0 | 0 | 0    | 1    | 1 | 1 | 1 |
| GO:0008652 | 4  | 4  | 100   | 1.13 | 0 | 0    | 0     | 0 | 0    | 0     | 0 | 0 | 0    | 1    | 1 | 1 | 1 |
| GO:0008654 | 26 | 23 | 88.46 | 1    | 1 | 3.85 | 1.1   | 2 | 7.69 | 1.66  | 0 | 0 | 0    | 1    | 1 | 1 | 1 |
| GO:0008656 | 9  | 9  | 100   | 1.13 | 0 | 0    | 0     | 0 | 0    | 0     | 0 | 0 | 0    | 1    | 1 | 1 | 1 |
| GO:0008665 | 1  | 1  | 100   | 1.13 | 0 | 0    | 0     | 0 | 0    | 0     | 0 | 0 | 0    | 1    | 1 | 1 | 1 |
| GO:0008667 | 5  | 3  | 60    | 0.68 | 1 | 20   | 5.73  | 1 | 20   | 4.31  | 0 | 0 | 0    | 1    | 1 | 1 | 1 |
| GO:0008668 | 1  | 1  | 100   | 1.13 | 0 | 0    | 0     | 0 | 0    | 0     | 0 | 0 | 0    | 1    | 1 | 1 | 1 |
| GO:0008670 | 2  | 2  | 100   | 1.13 | 0 | 0    | 0     | 0 | 0    | 0     | 0 | 0 | 0    | 1    | 1 | 1 | 1 |
| GO:0008705 | 2  | 1  | 50    | 0.57 | 1 | 50   | 14.32 | 0 | 0    | 0     | 0 | 0 | 0    | 1    | 1 | 1 | 1 |
| GO:0008717 | 7  | 7  | 100   | 1.13 | 0 | 0    | 0     | 0 | 0    | 0     | 0 | 0 | 0    | 1    | 1 | 1 | 1 |
| GO:0008722 | 1  | 1  | 100   | 1.13 | 0 | 0    | 0     | 0 | 0    | 0     | 0 | 0 | 0    | 1    | 1 | 1 | 1 |
| GO:0008723 | 1  | 1  | 100   | 1.13 | 0 | 0    | 0     | 0 | 0    | 0     | 0 | 0 | 0    | 1    | 1 | 1 | 1 |
| GO:0008736 | 1  | 1  | 100   | 1.13 | 0 | 0    | 0     | 0 | 0    | 0     | 0 | 0 | 0    | 1    | 1 | 1 | 1 |
| GO:0008746 | 6  | 6  | 100   | 1.13 | 0 | 0    | 0     | 0 | 0    | 0     | 0 | 0 | 0    | 1    | 1 | 1 | 1 |
| GO:0008750 | 1  | 1  | 100   | 1.13 | 0 | 0    | 0     | 0 | 0    | 0     | 0 | 0 | 0    | 1    | 1 | 1 | 1 |
| GO:0008753 | 3  | 3  | 100   | 1.13 | 0 | 0    | 0     | 0 | 0    | 0     | 0 | 0 | 0    | 1    | 1 | 1 | 1 |
| GO:0008757 | 75 | 72 | 96    | 1.09 | 0 | 0    | 0     | 3 | 4    | 0.86  | 0 | 0 | 0    | 1    | 1 | 1 | 1 |
| GO:0008759 | 2  | 1  | 50    | 0.57 | 0 | 0    | 0     | 1 | 50   | 10.76 | 0 | 0 | 0    | 1    | 1 | 1 | 1 |
| GO:0008768 | 1  | 1  | 100   | 1.13 | 0 | 0    | 0     | 0 | 0    | 0     | 0 | 0 | 0    | 1    | 1 | 1 | 1 |
| GO:0008778 | 2  | 2  | 100   | 1.13 | 0 | 0    | 0     | 0 | 0    | 0     | 0 | 0 | 0    | 1    | 1 | 1 | 1 |
| GO:0008781 | 1  | 1  | 100   | 1.13 | 0 | 0    | 0     | 0 | 0    | 0     | 0 | 0 | 0    | 1    | 1 | 1 | 1 |
| GO:0008784 | 3  | 3  | 100   | 1.13 | 0 | 0    | 0     | 0 | 0    | 0     | 0 | 0 | 0    | 1    | 1 | 1 | 1 |
| GO:0008796 | 4  | 4  | 100   | 1.13 | 0 | 0    | 0     | 0 | 0    | 0     | 0 | 0 | 0    | 1    | 1 | 1 | 1 |
| GO:0008798 | 2  | 2  | 100   | 1.13 | 0 | 0    | 0     | 0 | 0    | 0     | 0 | 0 | 0    | 1    | 1 | 1 | 1 |
| GO:0008803 | 2  | 2  | 100   | 1.13 | 0 | 0    | 0     | 0 | 0    | 0     | 0 | 0 | 0    | 1    | 1 | 1 | 1 |
| GO:0008808 | 2  | 2  | 100   | 1.13 | 0 | 0    | 0     | 0 | 0    | 0     | 0 | 0 | 0    | 1    | 1 | 1 | 1 |
| GO:0008812 | 1  | 1  | 100   | 1.13 | 0 | 0    | 0     | 0 | 0    | 0     | 0 | 0 | 0    | 1    | 1 | 1 | 1 |
| GO:0008819 | 17 | 17 | 100   | 1.13 | 0 | 0    | 0     | 0 | 0    | 0     | 0 | 0 | 0    | 1    | 1 | 1 | 1 |

|            |    |    |       |      |   |      |      |   |      |       |   |    |       |   |   |   |   |
|------------|----|----|-------|------|---|------|------|---|------|-------|---|----|-------|---|---|---|---|
| GO:0008822 | 1  | 1  | 100   | 1.13 | 0 | 0    | 0    | 0 | 0    | 0     | 0 | 0  | 0     | 1 | 1 | 1 | 1 |
| GO:0008828 | 1  | 1  | 100   | 1.13 | 0 | 0    | 0    | 0 | 0    | 0     | 0 | 0  | 0     | 1 | 1 | 1 | 1 |
| GO:0008831 | 1  | 1  | 100   | 1.13 | 0 | 0    | 0    | 0 | 0    | 0     | 0 | 0  | 0     | 1 | 1 | 1 | 1 |
| GO:0008875 | 5  | 1  | 20    | 0.23 | 1 | 20   | 5.73 | 2 | 40   | 8.61  | 1 | 20 | 5.64  | 1 | 1 | 1 | 1 |
| GO:0008878 | 2  | 1  | 50    | 0.57 | 0 | 0    | 0    | 1 | 50   | 10.76 | 0 | 0  | 0     | 1 | 1 | 1 | 1 |
| GO:0008889 | 9  | 9  | 100   | 1.13 | 0 | 0    | 0    | 0 | 0    | 0     | 0 | 0  | 0     | 1 | 1 | 1 | 1 |
| GO:0008890 | 5  | 5  | 100   | 1.13 | 0 | 0    | 0    | 0 | 0    | 0     | 0 | 0  | 0     | 1 | 1 | 1 | 1 |
| GO:0008892 | 2  | 2  | 100   | 1.13 | 0 | 0    | 0    | 0 | 0    | 0     | 0 | 0  | 0     | 1 | 1 | 1 | 1 |
| GO:0008898 | 4  | 3  | 75    | 0.85 | 1 | 25   | 7.16 | 0 | 0    | 0     | 0 | 0  | 0     | 1 | 1 | 1 | 1 |
| GO:0008900 | 2  | 2  | 100   | 1.13 | 0 | 0    | 0    | 0 | 0    | 0     | 0 | 0  | 0     | 1 | 1 | 1 | 1 |
| GO:0008905 | 1  | 1  | 100   | 1.13 | 0 | 0    | 0    | 0 | 0    | 0     | 0 | 0  | 0     | 1 | 1 | 1 | 1 |
| GO:0008907 | 4  | 4  | 100   | 1.13 | 0 | 0    | 0    | 0 | 0    | 0     | 0 | 0  | 0     | 1 | 1 | 1 | 1 |
| GO:0008920 | 4  | 4  | 100   | 1.13 | 0 | 0    | 0    | 0 | 0    | 0     | 0 | 0  | 0     | 1 | 1 | 1 | 1 |
| GO:0008921 | 4  | 4  | 100   | 1.13 | 0 | 0    | 0    | 0 | 0    | 0     | 0 | 0  | 0     | 1 | 1 | 1 | 1 |
| GO:0008932 | 2  | 2  | 100   | 1.13 | 0 | 0    | 0    | 0 | 0    | 0     | 0 | 0  | 0     | 1 | 1 | 1 | 1 |
| GO:0008934 | 13 | 13 | 100   | 1.13 | 0 | 0    | 0    | 0 | 0    | 0     | 0 | 0  | 0     | 1 | 1 | 1 | 1 |
| GO:0008955 | 1  | 1  | 100   | 1.13 | 0 | 0    | 0    | 0 | 0    | 0     | 0 | 0  | 0     | 1 | 1 | 1 | 1 |
| GO:0008967 | 1  | 1  | 100   | 1.13 | 0 | 0    | 0    | 0 | 0    | 0     | 0 | 0  | 0     | 1 | 1 | 1 | 1 |
| GO:0008970 | 1  | 1  | 100   | 1.13 | 0 | 0    | 0    | 0 | 0    | 0     | 0 | 0  | 0     | 1 | 1 | 1 | 1 |
| GO:0008974 | 2  | 2  | 100   | 1.13 | 0 | 0    | 0    | 0 | 0    | 0     | 0 | 0  | 0     | 1 | 1 | 1 | 1 |
| GO:0008978 | 3  | 3  | 100   | 1.13 | 0 | 0    | 0    | 0 | 0    | 0     | 0 | 0  | 0     | 1 | 1 | 1 | 1 |
| GO:0009008 | 3  | 3  | 100   | 1.13 | 0 | 0    | 0    | 0 | 0    | 0     | 0 | 0  | 0     | 1 | 1 | 1 | 1 |
| GO:0009017 | 2  | 1  | 50    | 0.57 | 0 | 0    | 0    | 1 | 50   | 10.76 | 0 | 0  | 0     | 1 | 1 | 1 | 1 |
| GO:0009022 | 1  | 1  | 100   | 1.13 | 0 | 0    | 0    | 0 | 0    | 0     | 0 | 0  | 0     | 1 | 1 | 1 | 1 |
| GO:0009045 | 1  | 1  | 100   | 1.13 | 0 | 0    | 0    | 0 | 0    | 0     | 0 | 0  | 0     | 1 | 1 | 1 | 1 |
| GO:0009048 | 1  | 1  | 100   | 1.13 | 0 | 0    | 0    | 0 | 0    | 0     | 0 | 0  | 0     | 1 | 1 | 1 | 1 |
| GO:0009049 | 3  | 3  | 100   | 1.13 | 0 | 0    | 0    | 0 | 0    | 0     | 0 | 0  | 0     | 1 | 1 | 1 | 1 |
| GO:0009051 | 1  | 1  | 100   | 1.13 | 0 | 0    | 0    | 0 | 0    | 0     | 0 | 0  | 0     | 1 | 1 | 1 | 1 |
| GO:0009052 | 1  | 1  | 100   | 1.13 | 0 | 0    | 0    | 0 | 0    | 0     | 0 | 0  | 0     | 1 | 1 | 1 | 1 |
| GO:0009054 | 2  | 2  | 100   | 1.13 | 0 | 0    | 0    | 0 | 0    | 0     | 0 | 0  | 0     | 1 | 1 | 1 | 1 |
| GO:0009055 | 5  | 3  | 60    | 0.68 | 1 | 20   | 5.73 | 1 | 20   | 4.31  | 0 | 0  | 0     | 1 | 1 | 1 | 1 |
| GO:0009056 | 2  | 1  | 50    | 0.57 | 0 | 0    | 0    | 0 | 0    | 0     | 1 | 50 | 14.11 | 1 | 1 | 1 | 1 |
| GO:0009058 | 71 | 67 | 94.37 | 1.07 | 3 | 4.23 | 1.21 | 1 | 1.41 | 0.3   | 0 | 0  | 0     | 1 | 1 | 1 | 1 |
| GO:0009060 | 19 | 18 | 94.74 | 1.07 | 1 | 5.26 | 1.51 | 0 | 0    | 0     | 0 | 0  | 0     | 1 | 1 | 1 | 1 |
| GO:0009063 | 1  | 1  | 100   | 1.13 | 0 | 0    | 0    | 0 | 0    | 0     | 0 | 0  | 0     | 1 | 1 | 1 | 1 |
| GO:0009072 | 6  | 6  | 100   | 1.13 | 0 | 0    | 0    | 0 | 0    | 0     | 0 | 0  | 0     | 1 | 1 | 1 | 1 |
| GO:0009073 | 5  | 5  | 100   | 1.13 | 0 | 0    | 0    | 0 | 0    | 0     | 0 | 0  | 0     | 1 | 1 | 1 | 1 |
| GO:0009081 | 3  | 3  | 100   | 1.13 | 0 | 0    | 0    | 0 | 0    | 0     | 0 | 0  | 0     | 1 | 1 | 1 | 1 |
| GO:0009082 | 5  | 5  | 100   | 1.13 | 0 | 0    | 0    | 0 | 0    | 0     | 0 | 0  | 0     | 1 | 1 | 1 | 1 |
| GO:0009083 | 1  | 1  | 100   | 1.13 | 0 | 0    | 0    | 0 | 0    | 0     | 0 | 0  | 0     | 1 | 1 | 1 | 1 |
| GO:0009086 | 5  | 4  | 80    | 0.91 | 1 | 20   | 5.73 | 0 | 0    | 0     | 0 | 0  | 0     | 1 | 1 | 1 | 1 |

|            |    |    |       |      |   |       |      |   |     |       |      |       |   |   |   |   |
|------------|----|----|-------|------|---|-------|------|---|-----|-------|------|-------|---|---|---|---|
| GO:0009088 | 1  | 1  | 100   | 1.13 | 0 | 0     | 0    | 0 | 0   | 0     | 0    | 0     | 1 | 1 | 1 | 1 |
| GO:0009094 | 1  | 1  | 100   | 1.13 | 0 | 0     | 0    | 0 | 0   | 0     | 0    | 0     | 1 | 1 | 1 | 1 |
| GO:0009101 | 3  | 3  | 100   | 1.13 | 0 | 0     | 0    | 0 | 0   | 0     | 0    | 0     | 1 | 1 | 1 | 1 |
| GO:0009103 | 4  | 4  | 100   | 1.13 | 0 | 0     | 0    | 0 | 0   | 0     | 0    | 0     | 1 | 1 | 1 | 1 |
| GO:0009105 | 3  | 3  | 100   | 1.13 | 0 | 0     | 0    | 0 | 0   | 0     | 0    | 0     | 1 | 1 | 1 | 1 |
| GO:0009107 | 4  | 4  | 100   | 1.13 | 0 | 0     | 0    | 0 | 0   | 0     | 0    | 0     | 1 | 1 | 1 | 1 |
| GO:0009108 | 3  | 3  | 100   | 1.13 | 0 | 0     | 0    | 0 | 0   | 0     | 0    | 0     | 1 | 1 | 1 | 1 |
| GO:0009113 | 22 | 22 | 100   | 1.13 | 0 | 0     | 0    | 0 | 0   | 0     | 0    | 0     | 1 | 1 | 1 | 1 |
| GO:0009116 | 15 | 15 | 100   | 1.13 | 0 | 0     | 0    | 0 | 0   | 0     | 0    | 0     | 1 | 1 | 1 | 1 |
| GO:0009117 | 15 | 14 | 93.33 | 1.06 | 0 | 0     | 0    | 0 | 0   | 1     | 6.67 | 1.88  | 1 | 1 | 1 | 1 |
| GO:0009152 | 2  | 2  | 100   | 1.13 | 0 | 0     | 0    | 0 | 0   | 0     | 0    | 0     | 1 | 1 | 1 | 1 |
| GO:0009156 | 7  | 7  | 100   | 1.13 | 0 | 0     | 0    | 0 | 0   | 0     | 0    | 0     | 1 | 1 | 1 | 1 |
| GO:0009165 | 13 | 13 | 100   | 1.13 | 0 | 0     | 0    | 0 | 0   | 0     | 0    | 0     | 1 | 1 | 1 | 1 |
| GO:0009166 | 3  | 3  | 100   | 1.13 | 0 | 0     | 0    | 0 | 0   | 0     | 0    | 0     | 1 | 1 | 1 | 1 |
| GO:0009168 | 1  | 0  | 0     | 0    | 0 | 0     | 0    | 0 | 0   | 1     | 100  | 28.22 | 1 | 1 | 1 | 1 |
| GO:0009181 | 1  | 1  | 100   | 1.13 | 0 | 0     | 0    | 0 | 0   | 0     | 0    | 0     | 1 | 1 | 1 | 1 |
| GO:0009186 | 4  | 4  | 100   | 1.13 | 0 | 0     | 0    | 0 | 0   | 0     | 0    | 0     | 1 | 1 | 1 | 1 |
| GO:0009191 | 1  | 1  | 100   | 1.13 | 0 | 0     | 0    | 0 | 0   | 0     | 0    | 0     | 1 | 1 | 1 | 1 |
| GO:0009220 | 3  | 3  | 100   | 1.13 | 0 | 0     | 0    | 0 | 0   | 0     | 0    | 0     | 1 | 1 | 1 | 1 |
| GO:0009225 | 9  | 9  | 100   | 1.13 | 0 | 0     | 0    | 0 | 0   | 0     | 0    | 0     | 1 | 1 | 1 | 1 |
| GO:0009229 | 1  | 1  | 100   | 1.13 | 0 | 0     | 0    | 0 | 0   | 0     | 0    | 0     | 1 | 1 | 1 | 1 |
| GO:0009231 | 3  | 3  | 100   | 1.13 | 0 | 0     | 0    | 0 | 0   | 0     | 0    | 0     | 1 | 1 | 1 | 1 |
| GO:0009239 | 5  | 3  | 60    | 0.68 | 1 | 20    | 5.73 | 1 | 20  | 4.31  | 0    | 0     | 1 | 1 | 1 | 1 |
| GO:0009247 | 2  | 2  | 100   | 1.13 | 0 | 0     | 0    | 0 | 0   | 0     | 0    | 0     | 1 | 1 | 1 | 1 |
| GO:0009249 | 2  | 2  | 100   | 1.13 | 0 | 0     | 0    | 0 | 0   | 0     | 0    | 0     | 1 | 1 | 1 | 1 |
| GO:0009257 | 2  | 2  | 100   | 1.13 | 0 | 0     | 0    | 0 | 0   | 0     | 0    | 0     | 1 | 1 | 1 | 1 |
| GO:0009262 | 3  | 3  | 100   | 1.13 | 0 | 0     | 0    | 0 | 0   | 0     | 0    | 0     | 1 | 1 | 1 | 1 |
| GO:0009264 | 1  | 1  | 100   | 1.13 | 0 | 0     | 0    | 0 | 0   | 0     | 0    | 0     | 1 | 1 | 1 | 1 |
| GO:0009266 | 1  | 0  | 0     | 0    | 0 | 0     | 0    | 0 | 0   | 1     | 100  | 28.22 | 1 | 1 | 1 | 1 |
| GO:0009298 | 4  | 4  | 100   | 1.13 | 0 | 0     | 0    | 0 | 0   | 0     | 0    | 0     | 1 | 1 | 1 | 1 |
| GO:0009301 | 5  | 5  | 100   | 1.13 | 0 | 0     | 0    | 0 | 0   | 0     | 0    | 0     | 1 | 1 | 1 | 1 |
| GO:0009303 | 1  | 1  | 100   | 1.13 | 0 | 0     | 0    | 0 | 0   | 0     | 0    | 0     | 1 | 1 | 1 | 1 |
| GO:0009306 | 27 | 27 | 100   | 1.13 | 0 | 0     | 0    | 0 | 0   | 0     | 0    | 0     | 1 | 1 | 1 | 1 |
| GO:0009311 | 2  | 2  | 100   | 1.13 | 0 | 0     | 0    | 0 | 0   | 0     | 0    | 0     | 1 | 1 | 1 | 1 |
| GO:0009312 | 7  | 7  | 100   | 1.13 | 0 | 0     | 0    | 0 | 0   | 0     | 0    | 0     | 1 | 1 | 1 | 1 |
| GO:0009314 | 5  | 5  | 100   | 1.13 | 0 | 0     | 0    | 0 | 0   | 0     | 0    | 0     | 1 | 1 | 1 | 1 |
| GO:0009315 | 7  | 6  | 85.71 | 0.97 | 1 | 14.29 | 4.09 | 0 | 0   | 0     | 0    | 0     | 1 | 1 | 1 | 1 |
| GO:0009320 | 7  | 7  | 100   | 1.13 | 0 | 0     | 0    | 0 | 0   | 0     | 0    | 0     | 1 | 1 | 1 | 1 |
| GO:0009331 | 5  | 5  | 100   | 1.13 | 0 | 0     | 0    | 0 | 0   | 0     | 0    | 0     | 1 | 1 | 1 | 1 |
| GO:0009341 | 8  | 8  | 100   | 1.13 | 0 | 0     | 0    | 0 | 0   | 0     | 0    | 0     | 1 | 1 | 1 | 1 |
| GO:0009348 | 1  | 0  | 0     | 0    | 0 | 0     | 0    | 1 | 100 | 21.53 | 0    | 0     | 1 | 1 | 1 | 1 |

|            |    |    |       |      |   |       |       |   |       |       |   |       |       |   |   |   |             |
|------------|----|----|-------|------|---|-------|-------|---|-------|-------|---|-------|-------|---|---|---|-------------|
| GO:0009353 | 1  | 1  | 100   | 1.13 | 0 | 0     | 0     | 0 | 0     | 0     | 0 | 0     | 0     | 1 | 1 | 1 | 1           |
| GO:0009374 | 4  | 4  | 100   | 1.13 | 0 | 0     | 0     | 0 | 0     | 0     | 0 | 0     | 0     | 1 | 1 | 1 | 1           |
| GO:0009383 | 3  | 3  | 100   | 1.13 | 0 | 0     | 0     | 0 | 0     | 0     | 0 | 0     | 0     | 1 | 1 | 1 | 1           |
| GO:0009384 | 1  | 1  | 100   | 1.13 | 0 | 0     | 0     | 0 | 0     | 0     | 0 | 0     | 0     | 1 | 1 | 1 | 1           |
| GO:0009395 | 3  | 2  | 66.67 | 0.75 | 1 | 33.33 | 9.54  | 0 | 0     | 0     | 0 | 0     | 0     | 1 | 1 | 1 | 1           |
| GO:0009396 | 12 | 12 | 100   | 1.13 | 0 | 0     | 0     | 0 | 0     | 0     | 0 | 0     | 0     | 1 | 1 | 1 | 1           |
| GO:0009399 | 5  | 5  | 100   | 1.13 | 0 | 0     | 0     | 0 | 0     | 0     | 0 | 0     | 0     | 1 | 1 | 1 | 1           |
| GO:0009401 | 12 | 9  | 75    | 0.85 | 2 | 16.67 | 4.77  | 1 | 8.33  | 1.79  | 0 | 0     | 0     | 1 | 1 | 1 | 1           |
| GO:0009405 | 21 | 18 | 85.71 | 0.97 | 2 | 9.52  | 2.73  | 1 | 4.76  | 1.03  | 0 | 0     | 0     | 1 | 1 | 1 | 1           |
| GO:0009406 | 7  | 5  | 71.43 | 0.81 | 1 | 14.29 | 4.09  | 1 | 14.29 | 3.08  | 0 | 0     | 0     | 1 | 1 | 1 | 1           |
| GO:0009408 | 30 | 26 | 86.67 | 0.98 | 2 | 6.67  | 1.91  | 1 | 3.33  | 0.72  | 1 | 3.33  | 0.94  | 1 | 1 | 1 | 1           |
| GO:0009409 | 4  | 4  | 100   | 1.13 | 0 | 0     | 0     | 0 | 0     | 0     | 0 | 0     | 0     | 1 | 1 | 1 | 1           |
| GO:0009411 | 2  | 2  | 100   | 1.13 | 0 | 0     | 0     | 0 | 0     | 0     | 0 | 0     | 0     | 1 | 1 | 1 | 1           |
| GO:0009416 | 3  | 3  | 100   | 1.13 | 0 | 0     | 0     | 0 | 0     | 0     | 0 | 0     | 0     | 1 | 1 | 1 | 1           |
| GO:0009434 | 3  | 3  | 100   | 1.13 | 0 | 0     | 0     | 0 | 0     | 0     | 0 | 0     | 0     | 1 | 1 | 1 | 1           |
| GO:0009435 | 2  | 2  | 100   | 1.13 | 0 | 0     | 0     | 0 | 0     | 0     | 0 | 0     | 0     | 1 | 1 | 1 | 1           |
| GO:0009437 | 7  | 7  | 100   | 1.13 | 0 | 0     | 0     | 0 | 0     | 0     | 0 | 0     | 0     | 1 | 1 | 1 | 1           |
| GO:0009448 | 1  | 1  | 100   | 1.13 | 0 | 0     | 0     | 0 | 0     | 0     | 0 | 0     | 0     | 1 | 1 | 1 | 1           |
| GO:0009451 | 2  | 2  | 100   | 1.13 | 0 | 0     | 0     | 0 | 0     | 0     | 0 | 0     | 0     | 1 | 1 | 1 | 1           |
| GO:0009457 | 3  | 2  | 66.67 | 0.75 | 0 | 0     | 0     | 1 | 33.33 | 7.18  | 0 | 0     | 0     | 1 | 1 | 1 | 1           |
| GO:0009460 | 4  | 3  | 75    | 0.85 | 0 | 0     | 0     | 0 | 0     | 0     | 1 | 25    | 7.06  | 1 | 1 | 1 | 1           |
| GO:0009461 | 3  | 3  | 100   | 1.13 | 0 | 0     | 0     | 0 | 0     | 0     | 0 | 0     | 0     | 1 | 1 | 1 | 1           |
| GO:0009481 | 11 | 10 | 90.91 | 1.03 | 0 | 0     | 0     | 1 | 9.09  | 1.96  | 0 | 0     | 0     | 1 | 1 | 1 | 1           |
| GO:0009482 | 11 | 10 | 90.91 | 1.03 | 0 | 0     | 0     | 1 | 9.09  | 1.96  | 0 | 0     | 0     | 1 | 1 | 1 | 1           |
| GO:0009483 | 11 | 10 | 90.91 | 1.03 | 0 | 0     | 0     | 1 | 9.09  | 1.96  | 0 | 0     | 0     | 1 | 1 | 1 | 1           |
| GO:0009485 | 11 | 10 | 90.91 | 1.03 | 0 | 0     | 0     | 1 | 9.09  | 1.96  | 0 | 0     | 0     | 1 | 1 | 1 | 1           |
| GO:0009487 | 2  | 1  | 50    | 0.57 | 0 | 0     | 0     | 1 | 50    | 10.76 | 0 | 0     | 0     | 1 | 1 | 1 | 1           |
| GO:0009489 | 1  | 1  | 100   | 1.13 | 0 | 0     | 0     | 0 | 0     | 0     | 0 | 0     | 0     | 1 | 1 | 1 | 1           |
| GO:0009492 | 3  | 3  | 100   | 1.13 | 0 | 0     | 0     | 0 | 0     | 0     | 0 | 0     | 0     | 1 | 1 | 1 | 1           |
| GO:0009497 | 5  | 4  | 80    | 0.91 | 0 | 0     | 0     | 0 | 0     | 0     | 1 | 20    | 5.64  | 1 | 1 | 1 | 1           |
| GO:0009589 | 1  | 1  | 100   | 1.13 | 0 | 0     | 0     | 0 | 0     | 0     | 0 | 0     | 0     | 1 | 1 | 1 | 1           |
| GO:0009592 | 1  | 1  | 100   | 1.13 | 0 | 0     | 0     | 0 | 0     | 0     | 0 | 0     | 0     | 1 | 1 | 1 | 1           |
| GO:0009597 | 1  | 0  | 0     | 0    | 0 | 0     | 0     | 1 | 100   | 21.53 | 0 | 0     | 0     | 1 | 1 | 1 | 1           |
| GO:0009605 | 1  | 1  | 100   | 1.13 | 0 | 0     | 0     | 0 | 0     | 0     | 0 | 0     | 0     | 1 | 1 | 1 | 1           |
| GO:0009607 | 2  | 0  | 0     | 0    | 0 | 0     | 0     | 2 | 100   | 21.53 | 0 | 0     | 0     | 1 | 1 | 1 | 1           |
| GO:0009611 | 2  | 2  | 100   | 1.13 | 0 | 0     | 0     | 0 | 0     | 0     | 0 | 0     | 0     | 1 | 1 | 1 | 1           |
| GO:0009613 | 10 | 10 | 100   | 1.13 | 0 | 0     | 0     | 0 | 0     | 0     | 0 | 0     | 0     | 1 | 1 | 1 | 1           |
| GO:0009615 | 4  | 2  | 50    | 0.57 | 2 | 50    | 14.32 | 0 | 0     | 0     | 0 | 0     | 0     | 1 | 1 | 1 | 1           |
| GO:0009617 | 7  | 5  | 71.43 | 0.81 | 0 | 0     | 0     | 2 | 28.57 | 6.15  | 0 | 0     | 0     | 1 | 1 | 1 | 1           |
| GO:0009618 | 13 | 7  | 53.85 | 0.61 | 0 | 0     | 0     | 0 | 0     | 0     | 6 | 46.15 | 13.03 | 1 | 1 | 1 | 0.016775835 |
| GO:0009619 | 1  | 1  | 100   | 1.13 | 0 | 0     | 0     | 0 | 0     | 0     | 0 | 0     | 0     | 1 | 1 | 1 | 1           |

|            |     |     |       |      |   |       |       |    |       |       |     |       |       |          |   |          |   |
|------------|-----|-----|-------|------|---|-------|-------|----|-------|-------|-----|-------|-------|----------|---|----------|---|
| GO:0009631 | 1   | 1   | 100   | 1.13 | 0 | 0     | 0     | 0  | 0     | 0     | 0   | 0     | 0     | 1        | 1 | 1        | 1 |
| GO:0009634 | 4   | 4   | 100   | 1.13 | 0 | 0     | 0     | 0  | 0     | 0     | 0   | 0     | 0     | 1        | 1 | 1        | 1 |
| GO:0009636 | 14  | 14  | 100   | 1.13 | 0 | 0     | 0     | 0  | 0     | 0     | 0   | 0     | 0     | 1        | 1 | 1        | 1 |
| GO:0009653 | 4   | 4   | 100   | 1.13 | 0 | 0     | 0     | 0  | 0     | 0     | 0   | 0     | 0     | 1        | 1 | 1        | 1 |
| GO:0009725 | 1   | 1   | 100   | 1.13 | 0 | 0     | 0     | 0  | 0     | 0     | 0   | 0     | 0     | 1        | 1 | 1        | 1 |
| GO:0009790 | 4   | 4   | 100   | 1.13 | 0 | 0     | 0     | 0  | 0     | 0     | 0   | 0     | 0     | 1        | 1 | 1        | 1 |
| GO:0009791 | 2   | 2   | 100   | 1.13 | 0 | 0     | 0     | 0  | 0     | 0     | 0   | 0     | 0     | 1        | 1 | 1        | 1 |
| GO:0009795 | 1   | 1   | 100   | 1.13 | 0 | 0     | 0     | 0  | 0     | 0     | 0   | 0     | 0     | 1        | 1 | 1        | 1 |
| GO:0009854 | 1   | 0   | 0     | 0    | 0 | 0     | 0     | 0  | 0     | 1     | 100 | 28.22 | 0     | 1        | 1 | 1        | 1 |
| GO:0009887 | 64  | 58  | 90.63 | 1.03 | 2 | 3.13  | 0.89  | 2  | 3.13  | 0.67  | 2   | 3.13  | 0.88  | 1        | 1 | 1        | 1 |
| GO:0009897 | 43  | 19  | 44.19 | 0.5  | 3 | 6.98  | 2     | 15 | 34.88 | 7.51  | 6   | 13.95 | 3.94  | 1        | 1 | 3.71E-06 | 1 |
| GO:0009898 | 3   | 3   | 100   | 1.13 | 0 | 0     | 0     | 0  | 0     | 0     | 0   | 0     | 0     | 1        | 1 | 1        | 1 |
| GO:0009948 | 1   | 1   | 100   | 1.13 | 0 | 0     | 0     | 0  | 0     | 0     | 0   | 0     | 0     | 1        | 1 | 1        | 1 |
| GO:0009952 | 2   | 2   | 100   | 1.13 | 0 | 0     | 0     | 0  | 0     | 0     | 0   | 0     | 0     | 1        | 1 | 1        | 1 |
| GO:0009953 | 2   | 2   | 100   | 1.13 | 0 | 0     | 0     | 0  | 0     | 0     | 0   | 0     | 0     | 1        | 1 | 1        | 1 |
| GO:0009954 | 1   | 1   | 100   | 1.13 | 0 | 0     | 0     | 0  | 0     | 0     | 0   | 0     | 0     | 1        | 1 | 1        | 1 |
| GO:0009966 | 1   | 0   | 0     | 0    | 0 | 0     | 0     | 1  | 100   | 21.53 | 0   | 0     | 0     | 1        | 1 | 1        | 1 |
| GO:0009968 | 1   | 0   | 0     | 0    | 0 | 0     | 0     | 1  | 100   | 21.53 | 0   | 0     | 0     | 1        | 1 | 1        | 1 |
| GO:0009986 | 10  | 5   | 50    | 0.57 | 0 | 0     | 0     | 3  | 30    | 6.46  | 2   | 20    | 5.64  | 1        | 1 | 1        | 1 |
| GO:0010003 | 8   | 5   | 62.5  | 0.71 | 1 | 12.5  | 3.58  | 1  | 12.5  | 2.69  | 1   | 12.5  | 3.53  | 1        | 1 | 1        | 1 |
| GO:0010008 | 3   | 2   | 66.67 | 0.75 | 0 | 0     | 0     | 1  | 33.33 | 7.18  | 0   | 0     | 0     | 1        | 1 | 1        | 1 |
| GO:0010165 | 3   | 3   | 100   | 1.13 | 0 | 0     | 0     | 0  | 0     | 0     | 0   | 0     | 0     | 1        | 1 | 1        | 1 |
| GO:0012501 | 1   | 1   | 100   | 1.13 | 0 | 0     | 0     | 0  | 0     | 0     | 0   | 0     | 0     | 1        | 1 | 1        | 1 |
| GO:0012505 | 4   | 4   | 100   | 1.13 | 0 | 0     | 0     | 0  | 0     | 0     | 0   | 0     | 0     | 1        | 1 | 1        | 1 |
| GO:0012506 | 5   | 4   | 80    | 0.91 | 0 | 0     | 0     | 1  | 20    | 4.31  | 0   | 0     | 0     | 1        | 1 | 1        | 1 |
| GO:0015008 | 9   | 7   | 77.78 | 0.88 | 0 | 0     | 0     | 2  | 22.22 | 4.78  | 0   | 0     | 0     | 1        | 1 | 1        | 1 |
| GO:0015012 | 1   | 1   | 100   | 1.13 | 0 | 0     | 0     | 0  | 0     | 0     | 0   | 0     | 0     | 1        | 1 | 1        | 1 |
| GO:0015014 | 3   | 3   | 100   | 1.13 | 0 | 0     | 0     | 0  | 0     | 0     | 0   | 0     | 0     | 1        | 1 | 1        | 1 |
| GO:0015017 | 2   | 2   | 100   | 1.13 | 0 | 0     | 0     | 0  | 0     | 0     | 0   | 0     | 0     | 1        | 1 | 1        | 1 |
| GO:0015018 | 5   | 5   | 100   | 1.13 | 0 | 0     | 0     | 0  | 0     | 0     | 0   | 0     | 0     | 1        | 1 | 1        | 1 |
| GO:0015020 | 7   | 5   | 71.43 | 0.81 | 0 | 0     | 0     | 1  | 14.29 | 3.08  | 1   | 14.29 | 4.03  | 1        | 1 | 1        | 1 |
| GO:0015025 | 2   | 2   | 100   | 1.13 | 0 | 0     | 0     | 0  | 0     | 0     | 0   | 0     | 0     | 1        | 1 | 1        | 1 |
| GO:0015026 | 3   | 0   | 0     | 0    | 2 | 66.67 | 19.09 | 1  | 33.33 | 7.18  | 0   | 0     | 0     | 1        | 1 | 1        | 1 |
| GO:0015027 | 3   | 3   | 100   | 1.13 | 0 | 0     | 0     | 0  | 0     | 0     | 0   | 0     | 0     | 1        | 1 | 1        | 1 |
| GO:0015030 | 5   | 5   | 100   | 1.13 | 0 | 0     | 0     | 0  | 0     | 0     | 0   | 0     | 0     | 1        | 1 | 1        | 1 |
| GO:0015031 | 388 | 377 | 97.16 | 1.1  | 4 | 1.03  | 0.3   | 6  | 1.55  | 0.33  | 1   | 0.26  | 0.07  | 3.36E-08 | 1 | 1        | 1 |
| GO:0015035 | 7   | 6   | 85.71 | 0.97 | 0 | 0     | 0     | 1  | 14.29 | 3.08  | 0   | 0     | 0     | 1        | 1 | 1        | 1 |
| GO:0015036 | 29  | 28  | 96.55 | 1.09 | 0 | 0     | 0     | 0  | 0     | 0     | 1   | 3.45  | 0.97  | 1        | 1 | 1        | 1 |
| GO:0015056 | 1   | 1   | 100   | 1.13 | 0 | 0     | 0     | 0  | 0     | 0     | 0   | 0     | 0     | 1        | 1 | 1        | 1 |
| GO:0015057 | 6   | 6   | 100   | 1.13 | 0 | 0     | 0     | 0  | 0     | 0     | 0   | 0     | 0     | 1        | 1 | 1        | 1 |
| GO:0015058 | 1   | 0   | 0     | 0    | 0 | 0     | 0     | 0  | 0     | 0     | 1   | 100   | 28.22 | 1        | 1 | 1        | 1 |

|            |    |    |       |      |   |       |       |   |       |       |   |       |       |   |   |   |            |
|------------|----|----|-------|------|---|-------|-------|---|-------|-------|---|-------|-------|---|---|---|------------|
| GO:0015065 | 1  | 1  | 100   | 1.13 | 0 | 0     | 0     | 0 | 0     | 0     | 0 | 0     | 0     | 1 | 1 | 1 | 1          |
| GO:0015068 | 3  | 3  | 100   | 1.13 | 0 | 0     | 0     | 0 | 0     | 0     | 0 | 0     | 0     | 1 | 1 | 1 | 1          |
| GO:0015071 | 15 | 14 | 93.33 | 1.06 | 1 | 6.67  | 1.91  | 0 | 0     | 0     | 0 | 0     | 0     | 1 | 1 | 1 | 1          |
| GO:0015072 | 2  | 1  | 50    | 0.57 | 1 | 50    | 14.32 | 0 | 0     | 0     | 0 | 0     | 0     | 1 | 1 | 1 | 1          |
| GO:0015073 | 3  | 2  | 66.67 | 0.75 | 1 | 33.33 | 9.54  | 0 | 0     | 0     | 0 | 0     | 0     | 1 | 1 | 1 | 1          |
| GO:0015074 | 10 | 10 | 100   | 1.13 | 0 | 0     | 0     | 0 | 0     | 0     | 0 | 0     | 0     | 1 | 1 | 1 | 1          |
| GO:0015075 | 1  | 1  | 100   | 1.13 | 0 | 0     | 0     | 0 | 0     | 0     | 0 | 0     | 0     | 1 | 1 | 1 | 1          |
| GO:0015076 | 7  | 6  | 85.71 | 0.97 | 1 | 14.29 | 4.09  | 0 | 0     | 0     | 0 | 0     | 0     | 1 | 1 | 1 | 1          |
| GO:0015077 | 3  | 3  | 100   | 1.13 | 0 | 0     | 0     | 0 | 0     | 0     | 0 | 0     | 0     | 1 | 1 | 1 | 1          |
| GO:0015078 | 64 | 61 | 95.31 | 1.08 | 1 | 1.56  | 0.45  | 2 | 3.13  | 0.67  | 0 | 0     | 0     | 1 | 1 | 1 | 1          |
| GO:0015085 | 1  | 1  | 100   | 1.13 | 0 | 0     | 0     | 0 | 0     | 0     | 0 | 0     | 0     | 1 | 1 | 1 | 1          |
| GO:0015087 | 4  | 4  | 100   | 1.13 | 0 | 0     | 0     | 0 | 0     | 0     | 0 | 0     | 0     | 1 | 1 | 1 | 1          |
| GO:0015097 | 2  | 2  | 100   | 1.13 | 0 | 0     | 0     | 0 | 0     | 0     | 0 | 0     | 0     | 1 | 1 | 1 | 1          |
| GO:0015108 | 3  | 1  | 33.33 | 0.38 | 0 | 0     | 0     | 1 | 33.33 | 7.18  | 1 | 33.33 | 9.41  | 1 | 1 | 1 | 1          |
| GO:0015111 | 2  | 1  | 50    | 0.57 | 0 | 0     | 0     | 0 | 0     | 0     | 1 | 50    | 14.11 | 1 | 1 | 1 | 1          |
| GO:0015116 | 1  | 0  | 0     | 0    | 0 | 0     | 0     | 1 | 100   | 21.53 | 0 | 0     | 0     | 1 | 1 | 1 | 1          |
| GO:0015125 | 3  | 0  | 0     | 0    | 0 | 0     | 0     | 0 | 0     | 0     | 3 | 100   | 28.22 | 1 | 1 | 1 | 0.21002992 |
| GO:0015132 | 1  | 1  | 100   | 1.13 | 0 | 0     | 0     | 0 | 0     | 0     | 0 | 0     | 0     | 1 | 1 | 1 | 1          |
| GO:0015137 | 1  | 1  | 100   | 1.13 | 0 | 0     | 0     | 0 | 0     | 0     | 0 | 0     | 0     | 1 | 1 | 1 | 1          |
| GO:0015169 | 2  | 1  | 50    | 0.57 | 1 | 50    | 14.32 | 0 | 0     | 0     | 0 | 0     | 0     | 1 | 1 | 1 | 1          |
| GO:0015171 | 6  | 5  | 83.33 | 0.94 | 0 | 0     | 0     | 1 | 16.67 | 3.59  | 0 | 0     | 0     | 1 | 1 | 1 | 1          |
| GO:0015174 | 1  | 1  | 100   | 1.13 | 0 | 0     | 0     | 0 | 0     | 0     | 0 | 0     | 0     | 1 | 1 | 1 | 1          |
| GO:0015175 | 3  | 3  | 100   | 1.13 | 0 | 0     | 0     | 0 | 0     | 0     | 0 | 0     | 0     | 1 | 1 | 1 | 1          |
| GO:0015180 | 1  | 1  | 100   | 1.13 | 0 | 0     | 0     | 0 | 0     | 0     | 0 | 0     | 0     | 1 | 1 | 1 | 1          |
| GO:0015181 | 1  | 1  | 100   | 1.13 | 0 | 0     | 0     | 0 | 0     | 0     | 0 | 0     | 0     | 1 | 1 | 1 | 1          |
| GO:0015186 | 1  | 1  | 100   | 1.13 | 0 | 0     | 0     | 0 | 0     | 0     | 0 | 0     | 0     | 1 | 1 | 1 | 1          |
| GO:0015187 | 3  | 3  | 100   | 1.13 | 0 | 0     | 0     | 0 | 0     | 0     | 0 | 0     | 0     | 1 | 1 | 1 | 1          |
| GO:0015189 | 1  | 1  | 100   | 1.13 | 0 | 0     | 0     | 0 | 0     | 0     | 0 | 0     | 0     | 1 | 1 | 1 | 1          |
| GO:0015193 | 1  | 1  | 100   | 1.13 | 0 | 0     | 0     | 0 | 0     | 0     | 0 | 0     | 0     | 1 | 1 | 1 | 1          |
| GO:0015197 | 1  | 1  | 100   | 1.13 | 0 | 0     | 0     | 0 | 0     | 0     | 0 | 0     | 0     | 1 | 1 | 1 | 1          |
| GO:0015198 | 8  | 8  | 100   | 1.13 | 0 | 0     | 0     | 0 | 0     | 0     | 0 | 0     | 0     | 1 | 1 | 1 | 1          |
| GO:0015204 | 1  | 1  | 100   | 1.13 | 0 | 0     | 0     | 0 | 0     | 0     | 0 | 0     | 0     | 1 | 1 | 1 | 1          |
| GO:0015207 | 5  | 5  | 100   | 1.13 | 0 | 0     | 0     | 0 | 0     | 0     | 0 | 0     | 0     | 1 | 1 | 1 | 1          |
| GO:0015227 | 1  | 1  | 100   | 1.13 | 0 | 0     | 0     | 0 | 0     | 0     | 0 | 0     | 0     | 1 | 1 | 1 | 1          |
| GO:0015232 | 2  | 2  | 100   | 1.13 | 0 | 0     | 0     | 0 | 0     | 0     | 0 | 0     | 0     | 1 | 1 | 1 | 1          |
| GO:0015234 | 1  | 1  | 100   | 1.13 | 0 | 0     | 0     | 0 | 0     | 0     | 0 | 0     | 0     | 1 | 1 | 1 | 1          |
| GO:0015238 | 3  | 3  | 100   | 1.13 | 0 | 0     | 0     | 0 | 0     | 0     | 0 | 0     | 0     | 1 | 1 | 1 | 1          |
| GO:0015245 | 1  | 1  | 100   | 1.13 | 0 | 0     | 0     | 0 | 0     | 0     | 0 | 0     | 0     | 1 | 1 | 1 | 1          |
| GO:0015247 | 3  | 2  | 66.67 | 0.75 | 0 | 0     | 0     | 0 | 0     | 0     | 1 | 33.33 | 9.41  | 1 | 1 | 1 | 1          |
| GO:0015250 | 5  | 3  | 60    | 0.68 | 1 | 20    | 5.73  | 0 | 0     | 0     | 1 | 20    | 5.64  | 1 | 1 | 1 | 1          |
| GO:0015267 | 2  | 2  | 100   | 1.13 | 0 | 0     | 0     | 0 | 0     | 0     | 0 | 0     | 0     | 1 | 1 | 1 | 1          |

|            |     |     |       |      |   |       |      |   |       |       |   |       |       |      |   |   |   |
|------------|-----|-----|-------|------|---|-------|------|---|-------|-------|---|-------|-------|------|---|---|---|
| GO:0015269 | 6   | 6   | 100   | 1.13 | 0 | 0     | 0    | 0 | 0     | 0     | 0 | 0     | 0     | 1    | 1 | 1 | 1 |
| GO:0015272 | 2   | 2   | 100   | 1.13 | 0 | 0     | 0    | 0 | 0     | 0     | 0 | 0     | 0     | 1    | 1 | 1 | 1 |
| GO:0015277 | 3   | 3   | 100   | 1.13 | 0 | 0     | 0    | 0 | 0     | 0     | 0 | 0     | 0     | 1    | 1 | 1 | 1 |
| GO:0015278 | 1   | 1   | 100   | 1.13 | 0 | 0     | 0    | 0 | 0     | 0     | 0 | 0     | 0     | 1    | 1 | 1 | 1 |
| GO:0015279 | 2   | 2   | 100   | 1.13 | 0 | 0     | 0    | 0 | 0     | 0     | 0 | 0     | 0     | 1    | 1 | 1 | 1 |
| GO:0015280 | 3   | 2   | 66.67 | 0.75 | 1 | 33.33 | 9.54 | 0 | 0     | 0     | 0 | 0     | 0     | 1    | 1 | 1 | 1 |
| GO:0015285 | 9   | 6   | 66.67 | 0.75 | 1 | 11.11 | 3.18 | 0 | 0     | 0     | 0 | 2     | 22.22 | 6.27 | 1 | 1 | 1 |
| GO:0015288 | 27  | 26  | 96.3  | 1.09 | 1 | 3.7   | 1.06 | 0 | 0     | 0     | 0 | 0     | 0     | 1    | 1 | 1 | 1 |
| GO:0015290 | 3   | 3   | 100   | 1.13 | 0 | 0     | 0    | 0 | 0     | 0     | 0 | 0     | 0     | 1    | 1 | 1 | 1 |
| GO:0015293 | 41  | 37  | 90.24 | 1.02 | 2 | 4.88  | 1.4  | 1 | 2.44  | 0.53  | 1 | 2.44  | 0.69  | 1    | 1 | 1 | 1 |
| GO:0015294 | 4   | 4   | 100   | 1.13 | 0 | 0     | 0    | 0 | 0     | 0     | 0 | 0     | 0     | 1    | 1 | 1 | 1 |
| GO:0015297 | 4   | 3   | 75    | 0.85 | 0 | 0     | 0    | 0 | 0     | 0     | 1 | 25    | 7.06  | 1    | 1 | 1 | 1 |
| GO:0015299 | 9   | 7   | 77.78 | 0.88 | 0 | 0     | 0    | 0 | 0     | 0     | 2 | 22.22 | 6.27  | 1    | 1 | 1 | 1 |
| GO:0015302 | 2   | 2   | 100   | 1.13 | 0 | 0     | 0    | 0 | 0     | 0     | 0 | 0     | 0     | 1    | 1 | 1 | 1 |
| GO:0015321 | 2   | 1   | 50    | 0.57 | 0 | 0     | 0    | 1 | 50    | 10.76 | 0 | 0     | 0     | 1    | 1 | 1 | 1 |
| GO:0015326 | 1   | 1   | 100   | 1.13 | 0 | 0     | 0    | 0 | 0     | 0     | 0 | 0     | 0     | 1    | 1 | 1 | 1 |
| GO:0015349 | 3   | 3   | 100   | 1.13 | 0 | 0     | 0    | 0 | 0     | 0     | 0 | 0     | 0     | 1    | 1 | 1 | 1 |
| GO:0015355 | 6   | 6   | 100   | 1.13 | 0 | 0     | 0    | 0 | 0     | 0     | 0 | 0     | 0     | 1    | 1 | 1 | 1 |
| GO:0015359 | 5   | 4   | 80    | 0.91 | 0 | 0     | 0    | 1 | 20    | 4.31  | 0 | 0     | 0     | 1    | 1 | 1 | 1 |
| GO:0015362 | 1   | 1   | 100   | 1.13 | 0 | 0     | 0    | 0 | 0     | 0     | 0 | 0     | 0     | 1    | 1 | 1 | 1 |
| GO:0015376 | 1   | 1   | 100   | 1.13 | 0 | 0     | 0    | 0 | 0     | 0     | 0 | 0     | 0     | 1    | 1 | 1 | 1 |
| GO:0015377 | 12  | 12  | 100   | 1.13 | 0 | 0     | 0    | 0 | 0     | 0     | 0 | 0     | 0     | 1    | 1 | 1 | 1 |
| GO:0015379 | 1   | 1   | 100   | 1.13 | 0 | 0     | 0    | 0 | 0     | 0     | 0 | 0     | 0     | 1    | 1 | 1 | 1 |
| GO:0015380 | 8   | 8   | 100   | 1.13 | 0 | 0     | 0    | 0 | 0     | 0     | 0 | 0     | 0     | 1    | 1 | 1 | 1 |
| GO:0015384 | 1   | 1   | 100   | 1.13 | 0 | 0     | 0    | 0 | 0     | 0     | 0 | 0     | 0     | 1    | 1 | 1 | 1 |
| GO:0015385 | 7   | 4   | 57.14 | 0.65 | 0 | 0     | 0    | 0 | 0     | 0     | 3 | 42.86 | 12.1  | 1    | 1 | 1 | 1 |
| GO:0015433 | 1   | 1   | 100   | 1.13 | 0 | 0     | 0    | 0 | 0     | 0     | 0 | 0     | 0     | 1    | 1 | 1 | 1 |
| GO:0015450 | 32  | 30  | 93.75 | 1.06 | 0 | 0     | 0    | 2 | 6.25  | 1.35  | 0 | 0     | 0     | 1    | 1 | 1 | 1 |
| GO:0015457 | 1   | 1   | 100   | 1.13 | 0 | 0     | 0    | 0 | 0     | 0     | 0 | 0     | 0     | 1    | 1 | 1 | 1 |
| GO:0015459 | 4   | 4   | 100   | 1.13 | 0 | 0     | 0    | 0 | 0     | 0     | 0 | 0     | 0     | 1    | 1 | 1 | 1 |
| GO:0015467 | 2   | 2   | 100   | 1.13 | 0 | 0     | 0    | 0 | 0     | 0     | 0 | 0     | 0     | 1    | 1 | 1 | 1 |
| GO:0015482 | 1   | 1   | 100   | 1.13 | 0 | 0     | 0    | 0 | 0     | 0     | 0 | 0     | 0     | 1    | 1 | 1 | 1 |
| GO:0015485 | 7   | 6   | 85.71 | 0.97 | 0 | 0     | 0    | 1 | 14.29 | 3.08  | 0 | 0     | 0     | 1    | 1 | 1 | 1 |
| GO:0015499 | 1   | 1   | 100   | 1.13 | 0 | 0     | 0    | 0 | 0     | 0     | 0 | 0     | 0     | 1    | 1 | 1 | 1 |
| GO:0015520 | 2   | 1   | 50    | 0.57 | 0 | 0     | 0    | 1 | 50    | 10.76 | 0 | 0     | 0     | 1    | 1 | 1 | 1 |
| GO:0015559 | 1   | 1   | 100   | 1.13 | 0 | 0     | 0    | 0 | 0     | 0     | 0 | 0     | 0     | 1    | 1 | 1 | 1 |
| GO:0015629 | 122 | 112 | 91.8  | 1.04 | 5 | 4.1   | 1.17 | 3 | 2.46  | 0.53  | 2 | 1.64  | 0.46  | 1    | 1 | 1 | 1 |
| GO:0015630 | 15  | 15  | 100   | 1.13 | 0 | 0     | 0    | 0 | 0     | 0     | 0 | 0     | 0     | 1    | 1 | 1 | 1 |
| GO:0015631 | 8   | 7   | 87.5  | 0.99 | 1 | 12.5  | 3.58 | 0 | 0     | 0     | 0 | 0     | 0     | 1    | 1 | 1 | 1 |
| GO:0015645 | 3   | 0   | 0     | 0    | 0 | 0     | 0    | 2 | 66.67 | 14.35 | 1 | 33.33 | 9.41  | 1    | 1 | 1 | 1 |
| GO:0015662 | 21  | 19  | 90.48 | 1.02 | 0 | 0     | 0    | 0 | 0     | 0     | 2 | 9.52  | 2.69  | 1    | 1 | 1 | 1 |



|            |    |    |       |      |   |      |       |   |       |       |   |       |       |   |             |   |   |
|------------|----|----|-------|------|---|------|-------|---|-------|-------|---|-------|-------|---|-------------|---|---|
| GO:0015671 | 16 | 7  | 43.75 | 0.5  | 8 | 50   | 14.32 | 0 | 0     | 0     | 1 | 6.25  | 1.76  | 1 | 0.000114918 | 1 | 1 |
| GO:0015672 | 3  | 3  | 100   | 1.13 | 0 | 0    | 0     | 0 | 0     | 0     | 0 | 0     | 0     | 1 | 1           | 1 | 1 |
| GO:0015680 | 1  | 1  | 100   | 1.13 | 0 | 0    | 0     | 0 | 0     | 0     | 0 | 0     | 0     | 1 | 1           | 1 | 1 |
| GO:0015694 | 2  | 2  | 100   | 1.13 | 0 | 0    | 0     | 0 | 0     | 0     | 0 | 0     | 0     | 1 | 1           | 1 | 1 |
| GO:0015701 | 2  | 2  | 100   | 1.13 | 0 | 0    | 0     | 0 | 0     | 0     | 0 | 0     | 0     | 1 | 1           | 1 | 1 |
| GO:0015711 | 7  | 7  | 100   | 1.13 | 0 | 0    | 0     | 0 | 0     | 0     | 0 | 0     | 0     | 1 | 1           | 1 | 1 |
| GO:0015718 | 3  | 2  | 66.67 | 0.75 | 0 | 0    | 0     | 1 | 33.33 | 7.18  | 0 | 0     | 0     | 1 | 1           | 1 | 1 |
| GO:0015721 | 3  | 1  | 33.33 | 0.38 | 0 | 0    | 0     | 0 | 0     | 0     | 2 | 66.67 | 18.82 | 1 | 1           | 1 | 1 |
| GO:0015722 | 1  | 1  | 100   | 1.13 | 0 | 0    | 0     | 0 | 0     | 0     | 0 | 0     | 0     | 1 | 1           | 1 | 1 |
| GO:0015724 | 1  | 1  | 100   | 1.13 | 0 | 0    | 0     | 0 | 0     | 0     | 0 | 0     | 0     | 1 | 1           | 1 | 1 |
| GO:0015732 | 1  | 1  | 100   | 1.13 | 0 | 0    | 0     | 0 | 0     | 0     | 0 | 0     | 0     | 1 | 1           | 1 | 1 |
| GO:0015758 | 9  | 8  | 88.89 | 1.01 | 0 | 0    | 0     | 0 | 0     | 0     | 1 | 11.11 | 3.14  | 1 | 1           | 1 | 1 |
| GO:0015780 | 3  | 3  | 100   | 1.13 | 0 | 0    | 0     | 0 | 0     | 0     | 0 | 0     | 0     | 1 | 1           | 1 | 1 |
| GO:0015794 | 2  | 1  | 50    | 0.57 | 1 | 50   | 14.32 | 0 | 0     | 0     | 0 | 0     | 0     | 1 | 1           | 1 | 1 |
| GO:0015808 | 1  | 1  | 100   | 1.13 | 0 | 0    | 0     | 0 | 0     | 0     | 0 | 0     | 0     | 1 | 1           | 1 | 1 |
| GO:0015809 | 1  | 1  | 100   | 1.13 | 0 | 0    | 0     | 0 | 0     | 0     | 0 | 0     | 0     | 1 | 1           | 1 | 1 |
| GO:0015816 | 3  | 3  | 100   | 1.13 | 0 | 0    | 0     | 0 | 0     | 0     | 0 | 0     | 0     | 1 | 1           | 1 | 1 |
| GO:0015819 | 1  | 1  | 100   | 1.13 | 0 | 0    | 0     | 0 | 0     | 0     | 0 | 0     | 0     | 1 | 1           | 1 | 1 |
| GO:0015824 | 1  | 1  | 100   | 1.13 | 0 | 0    | 0     | 0 | 0     | 0     | 0 | 0     | 0     | 1 | 1           | 1 | 1 |
| GO:0015833 | 1  | 1  | 100   | 1.13 | 0 | 0    | 0     | 0 | 0     | 0     | 0 | 0     | 0     | 1 | 1           | 1 | 1 |
| GO:0015840 | 1  | 1  | 100   | 1.13 | 0 | 0    | 0     | 0 | 0     | 0     | 0 | 0     | 0     | 1 | 1           | 1 | 1 |
| GO:0015844 | 3  | 3  | 100   | 1.13 | 0 | 0    | 0     | 0 | 0     | 0     | 0 | 0     | 0     | 1 | 1           | 1 | 1 |
| GO:0015858 | 3  | 3  | 100   | 1.13 | 0 | 0    | 0     | 0 | 0     | 0     | 0 | 0     | 0     | 1 | 1           | 1 | 1 |
| GO:0015872 | 1  | 1  | 100   | 1.13 | 0 | 0    | 0     | 0 | 0     | 0     | 0 | 0     | 0     | 1 | 1           | 1 | 1 |
| GO:0015875 | 1  | 0  | 0     | 0    | 1 | 100  | 28.63 | 0 | 0     | 0     | 0 | 0     | 0     | 1 | 1           | 1 | 1 |
| GO:0015888 | 1  | 1  | 100   | 1.13 | 0 | 0    | 0     | 0 | 0     | 0     | 0 | 0     | 0     | 1 | 1           | 1 | 1 |
| GO:0015904 | 2  | 1  | 50    | 0.57 | 0 | 0    | 0     | 1 | 50    | 10.76 | 0 | 0     | 0     | 1 | 1           | 1 | 1 |
| GO:0015908 | 2  | 2  | 100   | 1.13 | 0 | 0    | 0     | 0 | 0     | 0     | 0 | 0     | 0     | 1 | 1           | 1 | 1 |
| GO:0015909 | 2  | 2  | 100   | 1.13 | 0 | 0    | 0     | 0 | 0     | 0     | 0 | 0     | 0     | 1 | 1           | 1 | 1 |
| GO:0015917 | 3  | 2  | 66.67 | 0.75 | 0 | 0    | 0     | 0 | 0     | 0     | 1 | 33.33 | 9.41  | 1 | 1           | 1 | 1 |
| GO:0015922 | 3  | 3  | 100   | 1.13 | 0 | 0    | 0     | 0 | 0     | 0     | 0 | 0     | 0     | 1 | 1           | 1 | 1 |
| GO:0015926 | 2  | 2  | 100   | 1.13 | 0 | 0    | 0     | 0 | 0     | 0     | 0 | 0     | 0     | 1 | 1           | 1 | 1 |
| GO:0015934 | 5  | 4  | 80    | 0.91 | 1 | 20   | 5.73  | 0 | 0     | 0     | 0 | 0     | 0     | 1 | 1           | 1 | 1 |
| GO:0015935 | 7  | 7  | 100   | 1.13 | 0 | 0    | 0     | 0 | 0     | 0     | 0 | 0     | 0     | 1 | 1           | 1 | 1 |
| GO:0015937 | 5  | 5  | 100   | 1.13 | 0 | 0    | 0     | 0 | 0     | 0     | 0 | 0     | 0     | 1 | 1           | 1 | 1 |
| GO:0015961 | 1  | 1  | 100   | 1.13 | 0 | 0    | 0     | 0 | 0     | 0     | 0 | 0     | 0     | 1 | 1           | 1 | 1 |
| GO:0015979 | 2  | 2  | 100   | 1.13 | 0 | 0    | 0     | 0 | 0     | 0     | 0 | 0     | 0     | 1 | 1           | 1 | 1 |
| GO:0015980 | 1  | 0  | 0     | 0    | 0 | 0    | 0     | 1 | 100   | 21.53 | 0 | 0     | 0     | 1 | 1           | 1 | 1 |
| GO:0015983 | 1  | 1  | 100   | 1.13 | 0 | 0    | 0     | 0 | 0     | 0     | 0 | 0     | 0     | 1 | 1           | 1 | 1 |
| GO:0015986 | 82 | 78 | 95.12 | 1.08 | 1 | 1.22 | 0.35  | 3 | 3.66  | 0.79  | 0 | 0     | 0     | 1 | 1           | 1 | 1 |
| GO:0015988 | 10 | 10 | 100   | 1.13 | 0 | 0    | 0     | 0 | 0     | 0     | 0 | 0     | 0     | 1 | 1           | 1 | 1 |

|            |      |      |       |      |    |       |      |    |       |      |    |      |      |   |   |   |   |
|------------|------|------|-------|------|----|-------|------|----|-------|------|----|------|------|---|---|---|---|
| GO:0015991 | 10   | 10   | 100   | 1.13 | 0  | 0     | 0    | 0  | 0     | 0    | 0  | 0    | 0    | 1 | 1 | 1 | 1 |
| GO:0015992 | 78   | 75   | 96.15 | 1.09 | 1  | 1.28  | 0.37 | 2  | 2.56  | 0.55 | 0  | 0    | 0    | 1 | 1 | 1 | 1 |
| GO:0015999 | 2    | 2    | 100   | 1.13 | 0  | 0     | 0    | 0  | 0     | 0    | 0  | 0    | 0    | 1 | 1 | 1 | 1 |
| GO:0016000 | 2    | 2    | 100   | 1.13 | 0  | 0     | 0    | 0  | 0     | 0    | 0  | 0    | 0    | 1 | 1 | 1 | 1 |
| GO:0016003 | 7    | 6    | 85.71 | 0.97 | 0  | 0     | 0    | 1  | 14.29 | 3.08 | 0  | 0    | 0    | 1 | 1 | 1 | 1 |
| GO:0016005 | 2    | 2    | 100   | 1.13 | 0  | 0     | 0    | 0  | 0     | 0    | 0  | 0    | 0    | 1 | 1 | 1 | 1 |
| GO:0016011 | 2    | 2    | 100   | 1.13 | 0  | 0     | 0    | 0  | 0     | 0    | 0  | 0    | 0    | 1 | 1 | 1 | 1 |
| GO:0016012 | 1    | 1    | 100   | 1.13 | 0  | 0     | 0    | 0  | 0     | 0    | 0  | 0    | 0    | 1 | 1 | 1 | 1 |
| GO:0016019 | 1    | 1    | 100   | 1.13 | 0  | 0     | 0    | 0  | 0     | 0    | 0  | 0    | 0    | 1 | 1 | 1 | 1 |
| GO:0016020 | 1690 | 1464 | 86.63 | 0.98 | 64 | 3.79  | 1.08 | 77 | 4.56  | 0.98 | 85 | 5.03 | 1.42 | 1 | 1 | 1 | 1 |
| GO:0016021 | 1641 | 1428 | 87.02 | 0.99 | 65 | 3.96  | 1.13 | 77 | 4.69  | 1.01 | 71 | 4.33 | 1.22 | 1 | 1 | 1 | 1 |
| GO:0016023 | 36   | 34   | 94.44 | 1.07 | 0  | 0     | 0    | 2  | 5.56  | 1.2  | 0  | 0    | 0    | 1 | 1 | 1 | 1 |
| GO:0016025 | 1    | 1    | 100   | 1.13 | 0  | 0     | 0    | 0  | 0     | 0    | 0  | 0    | 0    | 1 | 1 | 1 | 1 |
| GO:0016034 | 1    | 1    | 100   | 1.13 | 0  | 0     | 0    | 0  | 0     | 0    | 0  | 0    | 0    | 1 | 1 | 1 | 1 |
| GO:0016035 | 1    | 1    | 100   | 1.13 | 0  | 0     | 0    | 0  | 0     | 0    | 0  | 0    | 0    | 1 | 1 | 1 | 1 |
| GO:0016042 | 68   | 55   | 80.88 | 0.92 | 3  | 4.41  | 1.26 | 6  | 8.82  | 1.9  | 4  | 5.88 | 1.66 | 1 | 1 | 1 | 1 |
| GO:0016044 | 3    | 3    | 100   | 1.13 | 0  | 0     | 0    | 0  | 0     | 0    | 0  | 0    | 0    | 1 | 1 | 1 | 1 |
| GO:0016049 | 11   | 8    | 72.73 | 0.82 | 1  | 9.09  | 2.6  | 1  | 9.09  | 1.96 | 1  | 9.09 | 2.57 | 1 | 1 | 1 | 1 |
| GO:0016051 | 7    | 7    | 100   | 1.13 | 0  | 0     | 0    | 0  | 0     | 0    | 0  | 0    | 0    | 1 | 1 | 1 | 1 |
| GO:0016055 | 25   | 24   | 96    | 1.09 | 0  | 0     | 0    | 1  | 4     | 0.86 | 0  | 0    | 0    | 1 | 1 | 1 | 1 |
| GO:0016064 | 17   | 12   | 70.59 | 0.8  | 0  | 0     | 0    | 5  | 29.41 | 6.33 | 0  | 0    | 0    | 1 | 1 | 1 | 1 |
| GO:0016066 | 15   | 11   | 73.33 | 0.83 | 1  | 6.67  | 1.91 | 2  | 13.33 | 2.87 | 1  | 6.67 | 1.88 | 1 | 1 | 1 | 1 |
| GO:0016070 | 1    | 1    | 100   | 1.13 | 0  | 0     | 0    | 0  | 0     | 0    | 0  | 0    | 0    | 1 | 1 | 1 | 1 |
| GO:0016071 | 5    | 5    | 100   | 1.13 | 0  | 0     | 0    | 0  | 0     | 0    | 0  | 0    | 0    | 1 | 1 | 1 | 1 |
| GO:0016079 | 4    | 3    | 75    | 0.85 | 1  | 25    | 7.16 | 0  | 0     | 0    | 0  | 0    | 0    | 1 | 1 | 1 | 1 |
| GO:0016080 | 3    | 3    | 100   | 1.13 | 0  | 0     | 0    | 0  | 0     | 0    | 0  | 0    | 0    | 1 | 1 | 1 | 1 |
| GO:0016081 | 7    | 5    | 71.43 | 0.81 | 1  | 14.29 | 4.09 | 1  | 14.29 | 3.08 | 0  | 0    | 0    | 1 | 1 | 1 | 1 |
| GO:0016083 | 1    | 1    | 100   | 1.13 | 0  | 0     | 0    | 0  | 0     | 0    | 0  | 0    | 0    | 1 | 1 | 1 | 1 |
| GO:0016126 | 8    | 8    | 100   | 1.13 | 0  | 0     | 0    | 0  | 0     | 0    | 0  | 0    | 0    | 1 | 1 | 1 | 1 |
| GO:0016153 | 1    | 1    | 100   | 1.13 | 0  | 0     | 0    | 0  | 0     | 0    | 0  | 0    | 0    | 1 | 1 | 1 | 1 |
| GO:0016155 | 3    | 3    | 100   | 1.13 | 0  | 0     | 0    | 0  | 0     | 0    | 0  | 0    | 0    | 1 | 1 | 1 | 1 |
| GO:0016165 | 7    | 7    | 100   | 1.13 | 0  | 0     | 0    | 0  | 0     | 0    | 0  | 0    | 0    | 1 | 1 | 1 | 1 |
| GO:0016171 | 11   | 9    | 81.82 | 0.93 | 2  | 18.18 | 5.21 | 0  | 0     | 0    | 0  | 0    | 0    | 1 | 1 | 1 | 1 |
| GO:0016172 | 1    | 1    | 100   | 1.13 | 0  | 0     | 0    | 0  | 0     | 0    | 0  | 0    | 0    | 1 | 1 | 1 | 1 |
| GO:0016175 | 9    | 7    | 77.78 | 0.88 | 0  | 0     | 0    | 2  | 22.22 | 4.78 | 0  | 0    | 0    | 1 | 1 | 1 | 1 |
| GO:0016176 | 1    | 1    | 100   | 1.13 | 0  | 0     | 0    | 0  | 0     | 0    | 0  | 0    | 0    | 1 | 1 | 1 | 1 |
| GO:0016181 | 2    | 2    | 100   | 1.13 | 0  | 0     | 0    | 0  | 0     | 0    | 0  | 0    | 0    | 1 | 1 | 1 | 1 |
| GO:0016183 | 4    | 4    | 100   | 1.13 | 0  | 0     | 0    | 0  | 0     | 0    | 0  | 0    | 0    | 1 | 1 | 1 | 1 |
| GO:0016192 | 64   | 62   | 96.88 | 1.1  | 0  | 0     | 0    | 2  | 3.13  | 0.67 | 0  | 0    | 0    | 1 | 1 | 1 | 1 |
| GO:0016196 | 6    | 6    | 100   | 1.13 | 0  | 0     | 0    | 0  | 0     | 0    | 0  | 0    | 0    | 1 | 1 | 1 | 1 |
| GO:0016197 | 16   | 16   | 100   | 1.13 | 0  | 0     | 0    | 0  | 0     | 0    | 0  | 0    | 0    | 1 | 1 | 1 | 1 |

|            |     |     |       |      |   |       |       |   |      |       |   |       |      |          |   |   |   |
|------------|-----|-----|-------|------|---|-------|-------|---|------|-------|---|-------|------|----------|---|---|---|
| GO:0016202 | 1   | 1   | 100   | 1.13 | 0 | 0     | 0     | 0 | 0    | 0     | 0 | 0     | 0    | 1        | 1 | 1 | 1 |
| GO:0016205 | 3   | 3   | 100   | 1.13 | 0 | 0     | 0     | 0 | 0    | 0     | 0 | 0     | 0    | 1        | 1 | 1 | 1 |
| GO:0016206 | 3   | 3   | 100   | 1.13 | 0 | 0     | 0     | 0 | 0    | 0     | 0 | 0     | 0    | 1        | 1 | 1 | 1 |
| GO:0016209 | 7   | 7   | 100   | 1.13 | 0 | 0     | 0     | 0 | 0    | 0     | 0 | 0     | 0    | 1        | 1 | 1 | 1 |
| GO:0016211 | 2   | 1   | 50    | 0.57 | 0 | 0     | 0     | 1 | 50   | 10.76 | 0 | 0     | 0    | 0        | 1 | 1 | 1 |
| GO:0016222 | 1   | 1   | 100   | 1.13 | 0 | 0     | 0     | 0 | 0    | 0     | 0 | 0     | 0    | 1        | 1 | 1 | 1 |
| GO:0016228 | 7   | 7   | 100   | 1.13 | 0 | 0     | 0     | 0 | 0    | 0     | 0 | 0     | 0    | 1        | 1 | 1 | 1 |
| GO:0016229 | 5   | 1   | 20    | 0.23 | 1 | 20    | 5.73  | 2 | 40   | 8.61  | 1 | 20    | 5.64 | 1        | 1 | 1 | 1 |
| GO:0016232 | 1   | 1   | 100   | 1.13 | 0 | 0     | 0     | 0 | 0    | 0     | 0 | 0     | 0    | 1        | 1 | 1 | 1 |
| GO:0016233 | 1   | 1   | 100   | 1.13 | 0 | 0     | 0     | 0 | 0    | 0     | 0 | 0     | 0    | 1        | 1 | 1 | 1 |
| GO:0016250 | 1   | 1   | 100   | 1.13 | 0 | 0     | 0     | 0 | 0    | 0     | 0 | 0     | 0    | 1        | 1 | 1 | 1 |
| GO:0016251 | 15  | 14  | 93.33 | 1.06 | 1 | 6.67  | 1.91  | 0 | 0    | 0     | 0 | 0     | 0    | 1        | 1 | 1 | 1 |
| GO:0016252 | 2   | 2   | 100   | 1.13 | 0 | 0     | 0     | 0 | 0    | 0     | 0 | 0     | 0    | 1        | 1 | 1 | 1 |
| GO:0016253 | 4   | 4   | 100   | 1.13 | 0 | 0     | 0     | 0 | 0    | 0     | 0 | 0     | 0    | 1        | 1 | 1 | 1 |
| GO:0016272 | 5   | 5   | 100   | 1.13 | 0 | 0     | 0     | 0 | 0    | 0     | 0 | 0     | 0    | 1        | 1 | 1 | 1 |
| GO:0016273 | 3   | 3   | 100   | 1.13 | 0 | 0     | 0     | 0 | 0    | 0     | 0 | 0     | 0    | 1        | 1 | 1 | 1 |
| GO:0016274 | 7   | 7   | 100   | 1.13 | 0 | 0     | 0     | 0 | 0    | 0     | 0 | 0     | 0    | 1        | 1 | 1 | 1 |
| GO:0016278 | 3   | 3   | 100   | 1.13 | 0 | 0     | 0     | 0 | 0    | 0     | 0 | 0     | 0    | 1        | 1 | 1 | 1 |
| GO:0016279 | 3   | 3   | 100   | 1.13 | 0 | 0     | 0     | 0 | 0    | 0     | 0 | 0     | 0    | 1        | 1 | 1 | 1 |
| GO:0016280 | 1   | 1   | 100   | 1.13 | 0 | 0     | 0     | 0 | 0    | 0     | 0 | 0     | 0    | 1        | 1 | 1 | 1 |
| GO:0016281 | 4   | 4   | 100   | 1.13 | 0 | 0     | 0     | 0 | 0    | 0     | 0 | 0     | 0    | 1        | 1 | 1 | 1 |
| GO:0016286 | 4   | 4   | 100   | 1.13 | 0 | 0     | 0     | 0 | 0    | 0     | 0 | 0     | 0    | 1        | 1 | 1 | 1 |
| GO:0016287 | 4   | 4   | 100   | 1.13 | 0 | 0     | 0     | 0 | 0    | 0     | 0 | 0     | 0    | 1        | 1 | 1 | 1 |
| GO:0016288 | 10  | 9   | 90    | 1.02 | 1 | 10    | 2.86  | 0 | 0    | 0     | 0 | 0     | 0    | 1        | 1 | 1 | 1 |
| GO:0016289 | 3   | 3   | 100   | 1.13 | 0 | 0     | 0     | 0 | 0    | 0     | 0 | 0     | 0    | 1        | 1 | 1 | 1 |
| GO:0016290 | 4   | 3   | 75    | 0.85 | 0 | 0     | 0     | 1 | 25   | 5.38  | 0 | 0     | 0    | 0        | 1 | 1 | 1 |
| GO:0016291 | 3   | 3   | 100   | 1.13 | 0 | 0     | 0     | 0 | 0    | 0     | 0 | 0     | 0    | 1        | 1 | 1 | 1 |
| GO:0016292 | 1   | 1   | 100   | 1.13 | 0 | 0     | 0     | 0 | 0    | 0     | 0 | 0     | 0    | 1        | 1 | 1 | 1 |
| GO:0016293 | 2   | 2   | 100   | 1.13 | 0 | 0     | 0     | 0 | 0    | 0     | 0 | 0     | 0    | 1        | 1 | 1 | 1 |
| GO:0016298 | 3   | 2   | 66.67 | 0.75 | 0 | 0     | 0     | 0 | 0    | 0     | 1 | 33.33 | 9.41 | 1        | 1 | 1 | 1 |
| GO:0016300 | 3   | 3   | 100   | 1.13 | 0 | 0     | 0     | 0 | 0    | 0     | 0 | 0     | 0    | 1        | 1 | 1 | 1 |
| GO:0016301 | 455 | 433 | 95.16 | 1.08 | 8 | 1.76  | 0.5   | 7 | 1.54 | 0.33  | 7 | 1.54  | 0.43 | 6.82E-05 | 1 | 1 | 1 |
| GO:0016302 | 1   | 1   | 100   | 1.13 | 0 | 0     | 0     | 0 | 0    | 0     | 0 | 0     | 0    | 1        | 1 | 1 | 1 |
| GO:0016303 | 16  | 15  | 93.75 | 1.06 | 1 | 6.25  | 1.79  | 0 | 0    | 0     | 0 | 0     | 0    | 1        | 1 | 1 | 1 |
| GO:0016304 | 1   | 0   | 0     | 0    | 1 | 100   | 28.63 | 0 | 0    | 0     | 0 | 0     | 0    | 1        | 1 | 1 | 1 |
| GO:0016305 | 3   | 2   | 66.67 | 0.75 | 1 | 33.33 | 9.54  | 0 | 0    | 0     | 0 | 0     | 0    | 1        | 1 | 1 | 1 |
| GO:0016306 | 2   | 1   | 50    | 0.57 | 1 | 50    | 14.32 | 0 | 0    | 0     | 0 | 0     | 0    | 1        | 1 | 1 | 1 |
| GO:0016308 | 12  | 12  | 100   | 1.13 | 0 | 0     | 0     | 0 | 0    | 0     | 0 | 0     | 0    | 1        | 1 | 1 | 1 |
| GO:0016310 | 9   | 9   | 100   | 1.13 | 0 | 0     | 0     | 0 | 0    | 0     | 0 | 0     | 0    | 1        | 1 | 1 | 1 |
| GO:0016311 | 2   | 2   | 100   | 1.13 | 0 | 0     | 0     | 0 | 0    | 0     | 0 | 0     | 0    | 1        | 1 | 1 | 1 |
| GO:0016322 | 3   | 3   | 100   | 1.13 | 0 | 0     | 0     | 0 | 0    | 0     | 0 | 0     | 0    | 1        | 1 | 1 | 1 |

|            |    |    |       |      |   |      |      |   |       |       |   |      |       |   |   |   |   |
|------------|----|----|-------|------|---|------|------|---|-------|-------|---|------|-------|---|---|---|---|
| GO:0016323 | 5  | 5  | 100   | 1.13 | 0 | 0    | 0    | 0 | 0     | 0     | 0 | 0    | 0     | 1 | 1 | 1 | 1 |
| GO:0016324 | 9  | 9  | 100   | 1.13 | 0 | 0    | 0    | 0 | 0     | 0     | 0 | 0    | 0     | 1 | 1 | 1 | 1 |
| GO:0016329 | 30 | 29 | 96.67 | 1.09 | 0 | 0    | 0    | 0 | 0     | 0     | 1 | 3.33 | 0.94  | 1 | 1 | 1 | 1 |
| GO:0016331 | 2  | 2  | 100   | 1.13 | 0 | 0    | 0    | 0 | 0     | 0     | 0 | 0    | 0     | 1 | 1 | 1 | 1 |
| GO:0016337 | 27 | 24 | 88.89 | 1.01 | 2 | 7.41 | 2.12 | 1 | 3.7   | 0.8   | 0 | 0    | 0     | 1 | 1 | 1 | 1 |
| GO:0016338 | 1  | 1  | 100   | 1.13 | 0 | 0    | 0    | 0 | 0     | 0     | 0 | 0    | 0     | 1 | 1 | 1 | 1 |
| GO:0016339 | 4  | 2  | 50    | 0.57 | 1 | 25   | 7.16 | 1 | 25    | 5.38  | 0 | 0    | 0     | 1 | 1 | 1 | 1 |
| GO:0016343 | 1  | 1  | 100   | 1.13 | 0 | 0    | 0    | 0 | 0     | 0     | 0 | 0    | 0     | 1 | 1 | 1 | 1 |
| GO:0016347 | 1  | 1  | 100   | 1.13 | 0 | 0    | 0    | 0 | 0     | 0     | 0 | 0    | 0     | 1 | 1 | 1 | 1 |
| GO:0016358 | 2  | 2  | 100   | 1.13 | 0 | 0    | 0    | 0 | 0     | 0     | 0 | 0    | 0     | 1 | 1 | 1 | 1 |
| GO:0016363 | 10 | 9  | 90    | 1.02 | 1 | 10   | 2.86 | 0 | 0     | 0     | 0 | 0    | 0     | 1 | 1 | 1 | 1 |
| GO:0016401 | 2  | 2  | 100   | 1.13 | 0 | 0    | 0    | 0 | 0     | 0     | 0 | 0    | 0     | 1 | 1 | 1 | 1 |
| GO:0016402 | 3  | 3  | 100   | 1.13 | 0 | 0    | 0    | 0 | 0     | 0     | 0 | 0    | 0     | 1 | 1 | 1 | 1 |
| GO:0016403 | 2  | 2  | 100   | 1.13 | 0 | 0    | 0    | 0 | 0     | 0     | 0 | 0    | 0     | 1 | 1 | 1 | 1 |
| GO:0016404 | 1  | 1  | 100   | 1.13 | 0 | 0    | 0    | 0 | 0     | 0     | 0 | 0    | 0     | 1 | 1 | 1 | 1 |
| GO:0016407 | 1  | 0  | 0     | 0    | 0 | 0    | 0    | 1 | 100   | 21.53 | 0 | 0    | 0     | 1 | 1 | 1 | 1 |
| GO:0016410 | 1  | 0  | 0     | 0    | 0 | 0    | 0    | 0 | 0     | 0     | 1 | 100  | 28.22 | 1 | 1 | 1 | 1 |
| GO:0016423 | 3  | 3  | 100   | 1.13 | 0 | 0    | 0    | 0 | 0     | 0     | 0 | 0    | 0     | 1 | 1 | 1 | 1 |
| GO:0016424 | 3  | 3  | 100   | 1.13 | 0 | 0    | 0    | 0 | 0     | 0     | 0 | 0    | 0     | 1 | 1 | 1 | 1 |
| GO:0016426 | 3  | 3  | 100   | 1.13 | 0 | 0    | 0    | 0 | 0     | 0     | 0 | 0    | 0     | 1 | 1 | 1 | 1 |
| GO:0016427 | 3  | 3  | 100   | 1.13 | 0 | 0    | 0    | 0 | 0     | 0     | 0 | 0    | 0     | 1 | 1 | 1 | 1 |
| GO:0016433 | 3  | 3  | 100   | 1.13 | 0 | 0    | 0    | 0 | 0     | 0     | 0 | 0    | 0     | 1 | 1 | 1 | 1 |
| GO:0016434 | 3  | 3  | 100   | 1.13 | 0 | 0    | 0    | 0 | 0     | 0     | 0 | 0    | 0     | 1 | 1 | 1 | 1 |
| GO:0016435 | 3  | 3  | 100   | 1.13 | 0 | 0    | 0    | 0 | 0     | 0     | 0 | 0    | 0     | 1 | 1 | 1 | 1 |
| GO:0016436 | 3  | 3  | 100   | 1.13 | 0 | 0    | 0    | 0 | 0     | 0     | 0 | 0    | 0     | 1 | 1 | 1 | 1 |
| GO:0016444 | 1  | 1  | 100   | 1.13 | 0 | 0    | 0    | 0 | 0     | 0     | 0 | 0    | 0     | 1 | 1 | 1 | 1 |
| GO:0016448 | 2  | 2  | 100   | 1.13 | 0 | 0    | 0    | 0 | 0     | 0     | 0 | 0    | 0     | 1 | 1 | 1 | 1 |
| GO:0016449 | 2  | 2  | 100   | 1.13 | 0 | 0    | 0    | 0 | 0     | 0     | 0 | 0    | 0     | 1 | 1 | 1 | 1 |
| GO:0016450 | 3  | 3  | 100   | 1.13 | 0 | 0    | 0    | 0 | 0     | 0     | 0 | 0    | 0     | 1 | 1 | 1 | 1 |
| GO:0016451 | 2  | 2  | 100   | 1.13 | 0 | 0    | 0    | 0 | 0     | 0     | 0 | 0    | 0     | 1 | 1 | 1 | 1 |
| GO:0016452 | 2  | 2  | 100   | 1.13 | 0 | 0    | 0    | 0 | 0     | 0     | 0 | 0    | 0     | 1 | 1 | 1 | 1 |
| GO:0016455 | 1  | 1  | 100   | 1.13 | 0 | 0    | 0    | 0 | 0     | 0     | 0 | 0    | 0     | 1 | 1 | 1 | 1 |
| GO:0016459 | 40 | 40 | 100   | 1.13 | 0 | 0    | 0    | 0 | 0     | 0     | 0 | 0    | 0     | 1 | 1 | 1 | 1 |
| GO:0016461 | 1  | 1  | 100   | 1.13 | 0 | 0    | 0    | 0 | 0     | 0     | 0 | 0    | 0     | 1 | 1 | 1 | 1 |
| GO:0016462 | 10 | 10 | 100   | 1.13 | 0 | 0    | 0    | 0 | 0     | 0     | 0 | 0    | 0     | 1 | 1 | 1 | 1 |
| GO:0016467 | 7  | 7  | 100   | 1.13 | 0 | 0    | 0    | 0 | 0     | 0     | 0 | 0    | 0     | 1 | 1 | 1 | 1 |
| GO:0016469 | 79 | 75 | 94.94 | 1.07 | 1 | 1.27 | 0.36 | 3 | 3.8   | 0.82  | 0 | 0    | 0     | 1 | 1 | 1 | 1 |
| GO:0016471 | 7  | 5  | 71.43 | 0.81 | 0 | 0    | 0    | 2 | 28.57 | 6.15  | 0 | 0    | 0     | 1 | 1 | 1 | 1 |
| GO:0016477 | 15 | 15 | 100   | 1.13 | 0 | 0    | 0    | 0 | 0     | 0     | 0 | 0    | 0     | 1 | 1 | 1 | 1 |
| GO:0016481 | 26 | 25 | 96.15 | 1.09 | 0 | 0    | 0    | 1 | 3.85  | 0.83  | 0 | 0    | 0     | 1 | 1 | 1 | 1 |
| GO:0016485 | 5  | 5  | 100   | 1.13 | 0 | 0    | 0    | 0 | 0     | 0     | 0 | 0    | 0     | 1 | 1 | 1 | 1 |

|            |     |     |       |      |    |       |      |    |       |       |    |       |      |   |   |   |   |
|------------|-----|-----|-------|------|----|-------|------|----|-------|-------|----|-------|------|---|---|---|---|
| GO:0016486 | 6   | 5   | 83.33 | 0.94 | 1  | 16.67 | 4.77 | 0  | 0     | 0     | 0  | 0     | 0    | 1 | 1 | 1 | 1 |
| GO:0016491 | 509 | 439 | 86.25 | 0.98 | 14 | 2.75  | 0.79 | 33 | 6.48  | 1.4   | 23 | 4.52  | 1.28 | 1 | 1 | 1 | 1 |
| GO:0016493 | 11  | 2   | 18.18 | 0.21 | 2  | 18.18 | 5.21 | 4  | 36.36 | 7.83  | 3  | 27.27 | 7.7  | 1 | 1 | 1 | 1 |
| GO:0016494 | 4   | 1   | 25    | 0.28 | 1  | 25    | 7.16 | 1  | 25    | 5.38  | 1  | 25    | 7.06 | 1 | 1 | 1 | 1 |
| GO:0016505 | 5   | 5   | 100   | 1.13 | 0  | 0     | 0    | 0  | 0     | 0     | 0  | 0     | 0    | 1 | 1 | 1 | 1 |
| GO:0016506 | 3   | 3   | 100   | 1.13 | 0  | 0     | 0    | 0  | 0     | 0     | 0  | 0     | 0    | 1 | 1 | 1 | 1 |
| GO:0016508 | 5   | 5   | 100   | 1.13 | 0  | 0     | 0    | 0  | 0     | 0     | 0  | 0     | 0    | 1 | 1 | 1 | 1 |
| GO:0016509 | 3   | 3   | 100   | 1.13 | 0  | 0     | 0    | 0  | 0     | 0     | 0  | 0     | 0    | 1 | 1 | 1 | 1 |
| GO:0016510 | 5   | 5   | 100   | 1.13 | 0  | 0     | 0    | 0  | 0     | 0     | 0  | 0     | 0    | 1 | 1 | 1 | 1 |
| GO:0016511 | 2   | 2   | 100   | 1.13 | 0  | 0     | 0    | 0  | 0     | 0     | 0  | 0     | 0    | 1 | 1 | 1 | 1 |
| GO:0016512 | 1   | 1   | 100   | 1.13 | 0  | 0     | 0    | 0  | 0     | 0     | 0  | 0     | 0    | 1 | 1 | 1 | 1 |
| GO:0016514 | 1   | 1   | 100   | 1.13 | 0  | 0     | 0    | 0  | 0     | 0     | 0  | 0     | 0    | 1 | 1 | 1 | 1 |
| GO:0016524 | 4   | 4   | 100   | 1.13 | 0  | 0     | 0    | 0  | 0     | 0     | 0  | 0     | 0    | 1 | 1 | 1 | 1 |
| GO:0016525 | 3   | 2   | 66.67 | 0.75 | 0  | 0     | 0    | 0  | 0     | 0     | 1  | 33.33 | 9.41 | 1 | 1 | 1 | 1 |
| GO:0016526 | 1   | 1   | 100   | 1.13 | 0  | 0     | 0    | 0  | 0     | 0     | 0  | 0     | 0    | 1 | 1 | 1 | 1 |
| GO:0016527 | 1   | 1   | 100   | 1.13 | 0  | 0     | 0    | 0  | 0     | 0     | 0  | 0     | 0    | 1 | 1 | 1 | 1 |
| GO:0016529 | 3   | 2   | 66.67 | 0.75 | 0  | 0     | 0    | 0  | 0     | 0     | 1  | 33.33 | 9.41 | 1 | 1 | 1 | 1 |
| GO:0016531 | 3   | 3   | 100   | 1.13 | 0  | 0     | 0    | 0  | 0     | 0     | 0  | 0     | 0    | 1 | 1 | 1 | 1 |
| GO:0016534 | 4   | 4   | 100   | 1.13 | 0  | 0     | 0    | 0  | 0     | 0     | 0  | 0     | 0    | 1 | 1 | 1 | 1 |
| GO:0016537 | 17  | 17  | 100   | 1.13 | 0  | 0     | 0    | 0  | 0     | 0     | 0  | 0     | 0    | 1 | 1 | 1 | 1 |
| GO:0016538 | 35  | 35  | 100   | 1.13 | 0  | 0     | 0    | 0  | 0     | 0     | 0  | 0     | 0    | 1 | 1 | 1 | 1 |
| GO:0016539 | 1   | 1   | 100   | 1.13 | 0  | 0     | 0    | 0  | 0     | 0     | 0  | 0     | 0    | 1 | 1 | 1 | 1 |
| GO:0016554 | 3   | 2   | 66.67 | 0.75 | 1  | 33.33 | 9.54 | 0  | 0     | 0     | 0  | 0     | 0    | 1 | 1 | 1 | 1 |
| GO:0016556 | 1   | 1   | 100   | 1.13 | 0  | 0     | 0    | 0  | 0     | 0     | 0  | 0     | 0    | 1 | 1 | 1 | 1 |
| GO:0016563 | 57  | 49  | 85.96 | 0.97 | 1  | 1.75  | 0.5  | 3  | 5.26  | 1.13  | 4  | 7.02  | 1.98 | 1 | 1 | 1 | 1 |
| GO:0016564 | 50  | 49  | 98    | 1.11 | 1  | 2     | 0.57 | 0  | 0     | 0     | 0  | 0     | 0    | 1 | 1 | 1 | 1 |
| GO:0016565 | 1   | 1   | 100   | 1.13 | 0  | 0     | 0    | 0  | 0     | 0     | 0  | 0     | 0    | 1 | 1 | 1 | 1 |
| GO:0016566 | 1   | 1   | 100   | 1.13 | 0  | 0     | 0    | 0  | 0     | 0     | 0  | 0     | 0    | 1 | 1 | 1 | 1 |
| GO:0016567 | 12  | 12  | 100   | 1.13 | 0  | 0     | 0    | 0  | 0     | 0     | 0  | 0     | 0    | 1 | 1 | 1 | 1 |
| GO:0016568 | 22  | 22  | 100   | 1.13 | 0  | 0     | 0    | 0  | 0     | 0     | 0  | 0     | 0    | 1 | 1 | 1 | 1 |
| GO:0016571 | 1   | 1   | 100   | 1.13 | 0  | 0     | 0    | 0  | 0     | 0     | 0  | 0     | 0    | 1 | 1 | 1 | 1 |
| GO:0016573 | 1   | 0   | 0     | 0    | 0  | 0     | 0    | 1  | 100   | 21.53 | 0  | 0     | 0    | 0 | 1 | 1 | 1 |
| GO:0016575 | 4   | 4   | 100   | 1.13 | 0  | 0     | 0    | 0  | 0     | 0     | 0  | 0     | 0    | 1 | 1 | 1 | 1 |
| GO:0016579 | 4   | 4   | 100   | 1.13 | 0  | 0     | 0    | 0  | 0     | 0     | 0  | 0     | 0    | 1 | 1 | 1 | 1 |
| GO:0016581 | 12  | 12  | 100   | 1.13 | 0  | 0     | 0    | 0  | 0     | 0     | 0  | 0     | 0    | 1 | 1 | 1 | 1 |
| GO:0016584 | 2   | 2   | 100   | 1.13 | 0  | 0     | 0    | 0  | 0     | 0     | 0  | 0     | 0    | 1 | 1 | 1 | 1 |
| GO:0016585 | 7   | 7   | 100   | 1.13 | 0  | 0     | 0    | 0  | 0     | 0     | 0  | 0     | 0    | 1 | 1 | 1 | 1 |
| GO:0016597 | 3   | 3   | 100   | 1.13 | 0  | 0     | 0    | 0  | 0     | 0     | 0  | 0     | 0    | 1 | 1 | 1 | 1 |
| GO:0016598 | 3   | 3   | 100   | 1.13 | 0  | 0     | 0    | 0  | 0     | 0     | 0  | 0     | 0    | 1 | 1 | 1 | 1 |
| GO:0016599 | 3   | 3   | 100   | 1.13 | 0  | 0     | 0    | 0  | 0     | 0     | 0  | 0     | 0    | 1 | 1 | 1 | 1 |
| GO:0016600 | 4   | 4   | 100   | 1.13 | 0  | 0     | 0    | 0  | 0     | 0     | 0  | 0     | 0    | 1 | 1 | 1 | 1 |

|            |     |     |       |      |    |      |      |    |       |       |    |       |       |             |   |   |             |
|------------|-----|-----|-------|------|----|------|------|----|-------|-------|----|-------|-------|-------------|---|---|-------------|
| GO:0016601 | 12  | 12  | 100   | 1.13 | 0  | 0    | 0    | 0  | 0     | 0     | 0  | 0     | 0     | 1           | 1 | 1 | 1           |
| GO:0016603 | 6   | 3   | 50    | 0.57 | 0  | 0    | 0    | 3  | 50    | 10.76 | 0  | 0     | 0     | 1           | 1 | 1 | 1           |
| GO:0016604 | 4   | 4   | 100   | 1.13 | 0  | 0    | 0    | 0  | 0     | 0     | 0  | 0     | 0     | 1           | 1 | 1 | 1           |
| GO:0016605 | 1   | 1   | 100   | 1.13 | 0  | 0    | 0    | 0  | 0     | 0     | 0  | 0     | 0     | 1           | 1 | 1 | 1           |
| GO:0016614 | 5   | 4   | 80    | 0.91 | 0  | 0    | 0    | 1  | 20    | 4.31  | 0  | 0     | 0     | 1           | 1 | 1 | 1           |
| GO:0016615 | 8   | 8   | 100   | 1.13 | 0  | 0    | 0    | 0  | 0     | 0     | 0  | 0     | 0     | 1           | 1 | 1 | 1           |
| GO:0016616 | 14  | 9   | 64.29 | 0.73 | 1  | 7.14 | 2.05 | 3  | 21.43 | 4.61  | 1  | 7.14  | 2.02  | 1           | 1 | 1 | 1           |
| GO:0016619 | 2   | 2   | 100   | 1.13 | 0  | 0    | 0    | 0  | 0     | 0     | 0  | 0     | 0     | 1           | 1 | 1 | 1           |
| GO:0016620 | 7   | 7   | 100   | 1.13 | 0  | 0    | 0    | 0  | 0     | 0     | 0  | 0     | 0     | 1           | 1 | 1 | 1           |
| GO:0016624 | 8   | 6   | 75    | 0.85 | 0  | 0    | 0    | 2  | 25    | 5.38  | 0  | 0     | 0     | 1           | 1 | 1 | 1           |
| GO:0016638 | 3   | 1   | 33.33 | 0.38 | 0  | 0    | 0    | 0  | 0     | 0     | 2  | 66.67 | 18.82 | 1           | 1 | 1 | 1           |
| GO:0016641 | 3   | 3   | 100   | 1.13 | 0  | 0    | 0    | 0  | 0     | 0     | 0  | 0     | 0     | 1           | 1 | 1 | 1           |
| GO:0016651 | 1   | 1   | 100   | 1.13 | 0  | 0    | 0    | 0  | 0     | 0     | 0  | 0     | 0     | 1           | 1 | 1 | 1           |
| GO:0016654 | 3   | 3   | 100   | 1.13 | 0  | 0    | 0    | 0  | 0     | 0     | 0  | 0     | 0     | 1           | 1 | 1 | 1           |
| GO:0016656 | 2   | 2   | 100   | 1.13 | 0  | 0    | 0    | 0  | 0     | 0     | 0  | 0     | 0     | 1           | 1 | 1 | 1           |
| GO:0016684 | 4   | 4   | 100   | 1.13 | 0  | 0    | 0    | 0  | 0     | 0     | 0  | 0     | 0     | 1           | 1 | 1 | 1           |
| GO:0016685 | 2   | 2   | 100   | 1.13 | 0  | 0    | 0    | 0  | 0     | 0     | 0  | 0     | 0     | 1           | 1 | 1 | 1           |
| GO:0016686 | 2   | 2   | 100   | 1.13 | 0  | 0    | 0    | 0  | 0     | 0     | 0  | 0     | 0     | 1           | 1 | 1 | 1           |
| GO:0016687 | 2   | 2   | 100   | 1.13 | 0  | 0    | 0    | 0  | 0     | 0     | 0  | 0     | 0     | 1           | 1 | 1 | 1           |
| GO:0016702 | 23  | 21  | 91.3  | 1.03 | 0  | 0    | 0    | 1  | 4.35  | 0.94  | 1  | 4.35  | 1.23  | 1           | 1 | 1 | 1           |
| GO:0016706 | 15  | 13  | 86.67 | 0.98 | 0  | 0    | 0    | 2  | 13.33 | 2.87  | 0  | 0     | 0     | 1           | 1 | 1 | 1           |
| GO:0016712 | 8   | 0   | 0     | 0    | 1  | 12.5 | 3.58 | 2  | 25    | 5.38  | 5  | 62.5  | 17.64 | 1           | 1 | 1 | 0.016155125 |
| GO:0016730 | 1   | 1   | 100   | 1.13 | 0  | 0    | 0    | 0  | 0     | 0     | 0  | 0     | 0     | 1           | 1 | 1 | 1           |
| GO:0016740 | 874 | 812 | 92.91 | 1.05 | 16 | 1.83 | 0.52 | 31 | 3.55  | 0.76  | 15 | 1.72  | 0.48  | 0.000318885 | 1 | 1 | 1           |
| GO:0016742 | 8   | 8   | 100   | 1.13 | 0  | 0    | 0    | 0  | 0     | 0     | 0  | 0     | 0     | 1           | 1 | 1 | 1           |
| GO:0016743 | 1   | 0   | 0     | 0    | 0  | 0    | 0    | 1  | 100   | 21.53 | 0  | 0     | 0     | 1           | 1 | 1 | 1           |
| GO:0016747 | 3   | 3   | 100   | 1.13 | 0  | 0    | 0    | 0  | 0     | 0     | 0  | 0     | 0     | 1           | 1 | 1 | 1           |
| GO:0016757 | 71  | 67  | 94.37 | 1.07 | 1  | 1.41 | 0.4  | 1  | 1.41  | 0.3   | 2  | 2.82  | 0.8   | 1           | 1 | 1 | 1           |
| GO:0016758 | 21  | 12  | 57.14 | 0.65 | 0  | 0    | 0    | 6  | 28.57 | 6.15  | 3  | 14.29 | 4.03  | 1           | 1 | 1 | 1           |
| GO:0016759 | 4   | 4   | 100   | 1.13 | 0  | 0    | 0    | 0  | 0     | 0     | 0  | 0     | 0     | 1           | 1 | 1 | 1           |
| GO:0016764 | 2   | 2   | 100   | 1.13 | 0  | 0    | 0    | 0  | 0     | 0     | 0  | 0     | 0     | 1           | 1 | 1 | 1           |
| GO:0016766 | 1   | 1   | 100   | 1.13 | 0  | 0    | 0    | 0  | 0     | 0     | 0  | 0     | 0     | 1           | 1 | 1 | 1           |
| GO:0016768 | 4   | 4   | 100   | 1.13 | 0  | 0    | 0    | 0  | 0     | 0     | 0  | 0     | 0     | 1           | 1 | 1 | 1           |
| GO:0016772 | 8   | 8   | 100   | 1.13 | 0  | 0    | 0    | 0  | 0     | 0     | 0  | 0     | 0     | 1           | 1 | 1 | 1           |
| GO:0016773 | 22  | 22  | 100   | 1.13 | 0  | 0    | 0    | 0  | 0     | 0     | 0  | 0     | 0     | 1           | 1 | 1 | 1           |
| GO:0016776 | 5   | 5   | 100   | 1.13 | 0  | 0    | 0    | 0  | 0     | 0     | 0  | 0     | 0     | 1           | 1 | 1 | 1           |
| GO:0016779 | 48  | 43  | 89.58 | 1.01 | 2  | 4.17 | 1.19 | 2  | 4.17  | 0.9   | 1  | 2.08  | 0.59  | 1           | 1 | 1 | 1           |
| GO:0016780 | 2   | 2   | 100   | 1.13 | 0  | 0    | 0    | 0  | 0     | 0     | 0  | 0     | 0     | 1           | 1 | 1 | 1           |
| GO:0016787 | 859 | 759 | 88.36 | 1    | 24 | 2.79 | 0.8  | 46 | 5.36  | 1.15  | 30 | 3.49  | 0.99  | 1           | 1 | 1 | 1           |
| GO:0016788 | 12  | 12  | 100   | 1.13 | 0  | 0    | 0    | 0  | 0     | 0     | 0  | 0     | 0     | 1           | 1 | 1 | 1           |
| GO:0016789 | 11  | 5   | 45.45 | 0.51 | 0  | 0    | 0    | 2  | 18.18 | 3.91  | 4  | 36.36 | 10.26 | 1           | 1 | 1 | 1           |

|            |     |     |       |      |   |      |      |   |       |       |   |      |       |   |   |   |   |
|------------|-----|-----|-------|------|---|------|------|---|-------|-------|---|------|-------|---|---|---|---|
| GO:0016790 | 1   | 1   | 100   | 1.13 | 0 | 0    | 0    | 0 | 0     | 0     | 0 | 0    | 1     | 1 | 1 | 1 |   |
| GO:0016791 | 2   | 1   | 50    | 0.57 | 0 | 0    | 0    | 0 | 0     | 0     | 1 | 50   | 14.11 | 1 | 1 | 1 | 1 |
| GO:0016798 | 51  | 43  | 84.31 | 0.95 | 2 | 3.92 | 1.12 | 2 | 3.92  | 0.84  | 4 | 7.84 | 2.21  | 1 | 1 | 1 | 1 |
| GO:0016804 | 4   | 4   | 100   | 1.13 | 0 | 0    | 0    | 0 | 0     | 0     | 0 | 0    | 0     | 1 | 1 | 1 | 1 |
| GO:0016805 | 8   | 7   | 87.5  | 0.99 | 0 | 0    | 0    | 0 | 0     | 0     | 1 | 12.5 | 3.53  | 1 | 1 | 1 | 1 |
| GO:0016810 | 7   | 6   | 85.71 | 0.97 | 0 | 0    | 0    | 1 | 14.29 | 3.08  | 0 | 0    | 0     | 1 | 1 | 1 | 1 |
| GO:0016811 | 2   | 1   | 50    | 0.57 | 0 | 0    | 0    | 1 | 50    | 10.76 | 0 | 0    | 0     | 1 | 1 | 1 | 1 |
| GO:0016814 | 4   | 4   | 100   | 1.13 | 0 | 0    | 0    | 0 | 0     | 0     | 0 | 0    | 0     | 1 | 1 | 1 | 1 |
| GO:0016818 | 7   | 7   | 100   | 1.13 | 0 | 0    | 0    | 0 | 0     | 0     | 0 | 0    | 0     | 1 | 1 | 1 | 1 |
| GO:0016820 | 36  | 33  | 91.67 | 1.04 | 1 | 2.78 | 0.8  | 2 | 5.56  | 1.2   | 0 | 0    | 0     | 1 | 1 | 1 | 1 |
| GO:0016829 | 97  | 93  | 95.88 | 1.09 | 4 | 4.12 | 1.18 | 0 | 0     | 0     | 0 | 0    | 0     | 1 | 1 | 1 | 1 |
| GO:0016831 | 26  | 25  | 96.15 | 1.09 | 1 | 3.85 | 1.1  | 0 | 0     | 0     | 0 | 0    | 0     | 1 | 1 | 1 | 1 |
| GO:0016836 | 6   | 6   | 100   | 1.13 | 0 | 0    | 0    | 0 | 0     | 0     | 0 | 0    | 0     | 1 | 1 | 1 | 1 |
| GO:0016844 | 2   | 2   | 100   | 1.13 | 0 | 0    | 0    | 0 | 0     | 0     | 0 | 0    | 0     | 1 | 1 | 1 | 1 |
| GO:0016849 | 2   | 0   | 0     | 0    | 0 | 0    | 0    | 2 | 100   | 21.53 | 0 | 0    | 0     | 1 | 1 | 1 | 1 |
| GO:0016851 | 3   | 3   | 100   | 1.13 | 0 | 0    | 0    | 0 | 0     | 0     | 0 | 0    | 0     | 1 | 1 | 1 | 1 |
| GO:0016852 | 3   | 3   | 100   | 1.13 | 0 | 0    | 0    | 0 | 0     | 0     | 0 | 0    | 0     | 1 | 1 | 1 | 1 |
| GO:0016853 | 93  | 87  | 93.55 | 1.06 | 1 | 1.08 | 0.31 | 2 | 2.15  | 0.46  | 3 | 3.23 | 0.91  | 1 | 1 | 1 | 1 |
| GO:0016855 | 3   | 3   | 100   | 1.13 | 0 | 0    | 0    | 0 | 0     | 0     | 0 | 0    | 0     | 1 | 1 | 1 | 1 |
| GO:0016857 | 1   | 1   | 100   | 1.13 | 0 | 0    | 0    | 0 | 0     | 0     | 0 | 0    | 0     | 1 | 1 | 1 | 1 |
| GO:0016868 | 11  | 10  | 90.91 | 1.03 | 0 | 0    | 0    | 1 | 9.09  | 1.96  | 0 | 0    | 0     | 1 | 1 | 1 | 1 |
| GO:0016874 | 133 | 126 | 94.74 | 1.07 | 2 | 1.5  | 0.43 | 4 | 3.01  | 0.65  | 1 | 0.75 | 0.21  | 1 | 1 | 1 | 1 |
| GO:0016881 | 1   | 1   | 100   | 1.13 | 0 | 0    | 0    | 0 | 0     | 0     | 0 | 0    | 0     | 1 | 1 | 1 | 1 |
| GO:0016885 | 1   | 1   | 100   | 1.13 | 0 | 0    | 0    | 0 | 0     | 0     | 0 | 0    | 0     | 1 | 1 | 1 | 1 |
| GO:0016887 | 16  | 15  | 93.75 | 1.06 | 0 | 0    | 0    | 0 | 0     | 0     | 1 | 6.25 | 1.76  | 1 | 1 | 1 | 1 |
| GO:0016892 | 1   | 0   | 0     | 0    | 0 | 0    | 0    | 1 | 100   | 21.53 | 0 | 0    | 0     | 1 | 1 | 1 | 1 |
| GO:0016893 | 1   | 1   | 100   | 1.13 | 0 | 0    | 0    | 0 | 0     | 0     | 0 | 0    | 0     | 1 | 1 | 1 | 1 |
| GO:0016908 | 17  | 17  | 100   | 1.13 | 0 | 0    | 0    | 0 | 0     | 0     | 0 | 0    | 0     | 1 | 1 | 1 | 1 |
| GO:0016909 | 17  | 17  | 100   | 1.13 | 0 | 0    | 0    | 0 | 0     | 0     | 0 | 0    | 0     | 1 | 1 | 1 | 1 |
| GO:0016910 | 17  | 17  | 100   | 1.13 | 0 | 0    | 0    | 0 | 0     | 0     | 0 | 0    | 0     | 1 | 1 | 1 | 1 |
| GO:0016911 | 17  | 17  | 100   | 1.13 | 0 | 0    | 0    | 0 | 0     | 0     | 0 | 0    | 0     | 1 | 1 | 1 | 1 |
| GO:0016912 | 17  | 17  | 100   | 1.13 | 0 | 0    | 0    | 0 | 0     | 0     | 0 | 0    | 0     | 1 | 1 | 1 | 1 |
| GO:0016919 | 1   | 1   | 100   | 1.13 | 0 | 0    | 0    | 0 | 0     | 0     | 0 | 0    | 0     | 1 | 1 | 1 | 1 |
| GO:0016922 | 5   | 5   | 100   | 1.13 | 0 | 0    | 0    | 0 | 0     | 0     | 0 | 0    | 0     | 1 | 1 | 1 | 1 |
| GO:0016923 | 7   | 4   | 57.14 | 0.65 | 0 | 0    | 0    | 3 | 42.86 | 9.23  | 0 | 0    | 0     | 1 | 1 | 1 | 1 |
| GO:0016925 | 2   | 2   | 100   | 1.13 | 0 | 0    | 0    | 0 | 0     | 0     | 0 | 0    | 0     | 1 | 1 | 1 | 1 |
| GO:0016932 | 26  | 26  | 100   | 1.13 | 0 | 0    | 0    | 0 | 0     | 0     | 0 | 0    | 0     | 1 | 1 | 1 | 1 |
| GO:0016937 | 3   | 3   | 100   | 1.13 | 0 | 0    | 0    | 0 | 0     | 0     | 0 | 0    | 0     | 1 | 1 | 1 | 1 |
| GO:0016946 | 3   | 3   | 100   | 1.13 | 0 | 0    | 0    | 0 | 0     | 0     | 0 | 0    | 0     | 1 | 1 | 1 | 1 |
| GO:0016954 | 1   | 1   | 100   | 1.13 | 0 | 0    | 0    | 0 | 0     | 0     | 0 | 0    | 0     | 1 | 1 | 1 | 1 |
| GO:0016962 | 3   | 3   | 100   | 1.13 | 0 | 0    | 0    | 0 | 0     | 0     | 0 | 0    | 0     | 1 | 1 | 1 | 1 |

|            |    |    |       |      |   |       |       |   |       |       |   |       |     |   |   |   |   |
|------------|----|----|-------|------|---|-------|-------|---|-------|-------|---|-------|-----|---|---|---|---|
| GO:0016971 | 2  | 2  | 100   | 1.13 | 0 | 0     | 0     | 0 | 0     | 0     | 0 | 0     | 0   | 1 | 1 | 1 | 1 |
| GO:0016978 | 8  | 8  | 100   | 1.13 | 0 | 0     | 0     | 0 | 0     | 0     | 0 | 0     | 0   | 1 | 1 | 1 | 1 |
| GO:0016986 | 1  | 0  | 0     | 0    | 0 | 0     | 0     | 1 | 100   | 21.53 | 0 | 0     | 0   | 1 | 1 | 1 | 1 |
| GO:0016987 | 1  | 1  | 100   | 1.13 | 0 | 0     | 0     | 0 | 0     | 0     | 0 | 0     | 0   | 1 | 1 | 1 | 1 |
| GO:0016992 | 3  | 3  | 100   | 1.13 | 0 | 0     | 0     | 0 | 0     | 0     | 0 | 0     | 0   | 1 | 1 | 1 | 1 |
| GO:0016998 | 4  | 4  | 100   | 1.13 | 0 | 0     | 0     | 0 | 0     | 0     | 0 | 0     | 0   | 1 | 1 | 1 | 1 |
| GO:0017014 | 1  | 1  | 100   | 1.13 | 0 | 0     | 0     | 0 | 0     | 0     | 0 | 0     | 0   | 1 | 1 | 1 | 1 |
| GO:0017015 | 1  | 1  | 100   | 1.13 | 0 | 0     | 0     | 0 | 0     | 0     | 0 | 0     | 0   | 1 | 1 | 1 | 1 |
| GO:0017017 | 15 | 15 | 100   | 1.13 | 0 | 0     | 0     | 0 | 0     | 0     | 0 | 0     | 0   | 1 | 1 | 1 | 1 |
| GO:0017018 | 13 | 12 | 92.31 | 1.05 | 1 | 7.69  | 2.2   | 0 | 0     | 0     | 0 | 0     | 0   | 1 | 1 | 1 | 1 |
| GO:0017022 | 1  | 0  | 0     | 0    | 1 | 100   | 28.63 | 0 | 0     | 0     | 0 | 0     | 0   | 1 | 1 | 1 | 1 |
| GO:0017025 | 8  | 8  | 100   | 1.13 | 0 | 0     | 0     | 0 | 0     | 0     | 0 | 0     | 0   | 1 | 1 | 1 | 1 |
| GO:0017039 | 5  | 5  | 100   | 1.13 | 0 | 0     | 0     | 0 | 0     | 0     | 0 | 0     | 0   | 1 | 1 | 1 | 1 |
| GO:0017040 | 2  | 2  | 100   | 1.13 | 0 | 0     | 0     | 0 | 0     | 0     | 0 | 0     | 0   | 1 | 1 | 1 | 1 |
| GO:0017050 | 3  | 2  | 66.67 | 0.75 | 1 | 33.33 | 9.54  | 0 | 0     | 0     | 0 | 0     | 0   | 1 | 1 | 1 | 1 |
| GO:0017053 | 6  | 6  | 100   | 1.13 | 0 | 0     | 0     | 0 | 0     | 0     | 0 | 0     | 0   | 1 | 1 | 1 | 1 |
| GO:0017057 | 7  | 5  | 71.43 | 0.81 | 0 | 0     | 0     | 2 | 28.57 | 6.15  | 0 | 0     | 0   | 1 | 1 | 1 | 1 |
| GO:0017061 | 2  | 2  | 100   | 1.13 | 0 | 0     | 0     | 0 | 0     | 0     | 0 | 0     | 0   | 1 | 1 | 1 | 1 |
| GO:0017068 | 1  | 1  | 100   | 1.13 | 0 | 0     | 0     | 0 | 0     | 0     | 0 | 0     | 0   | 1 | 1 | 1 | 1 |
| GO:0017070 | 4  | 4  | 100   | 1.13 | 0 | 0     | 0     | 0 | 0     | 0     | 0 | 0     | 0   | 1 | 1 | 1 | 1 |
| GO:0017072 | 4  | 4  | 100   | 1.13 | 0 | 0     | 0     | 0 | 0     | 0     | 0 | 0     | 0   | 1 | 1 | 1 | 1 |
| GO:0017075 | 2  | 1  | 50    | 0.57 | 0 | 0     | 0     | 1 | 50    | 10.76 | 0 | 0     | 0   | 1 | 1 | 1 | 1 |
| GO:0017083 | 4  | 4  | 100   | 1.13 | 0 | 0     | 0     | 0 | 0     | 0     | 0 | 0     | 0   | 1 | 1 | 1 | 1 |
| GO:0017095 | 1  | 1  | 100   | 1.13 | 0 | 0     | 0     | 0 | 0     | 0     | 0 | 0     | 0   | 1 | 1 | 1 | 1 |
| GO:0017103 | 1  | 1  | 100   | 1.13 | 0 | 0     | 0     | 0 | 0     | 0     | 0 | 0     | 0   | 1 | 1 | 1 | 1 |
| GO:0017110 | 11 | 11 | 100   | 1.13 | 0 | 0     | 0     | 0 | 0     | 0     | 0 | 0     | 0   | 1 | 1 | 1 | 1 |
| GO:0017113 | 1  | 1  | 100   | 1.13 | 0 | 0     | 0     | 0 | 0     | 0     | 0 | 0     | 0   | 1 | 1 | 1 | 1 |
| GO:0017121 | 2  | 2  | 100   | 1.13 | 0 | 0     | 0     | 0 | 0     | 0     | 0 | 0     | 0   | 1 | 1 | 1 | 1 |
| GO:0017124 | 14 | 13 | 92.86 | 1.05 | 0 | 0     | 0     | 1 | 7.14  | 1.54  | 0 | 0     | 0   | 1 | 1 | 1 | 1 |
| GO:0017127 | 4  | 3  | 75    | 0.85 | 0 | 0     | 0     | 1 | 25    | 5.38  | 0 | 0     | 0   | 1 | 1 | 1 | 1 |
| GO:0017128 | 2  | 2  | 100   | 1.13 | 0 | 0     | 0     | 0 | 0     | 0     | 0 | 0     | 0   | 1 | 1 | 1 | 1 |
| GO:0017129 | 2  | 1  | 50    | 0.57 | 0 | 0     | 0     | 1 | 50    | 10.76 | 0 | 0     | 0   | 1 | 1 | 1 | 1 |
| GO:0017133 | 3  | 3  | 100   | 1.13 | 0 | 0     | 0     | 0 | 0     | 0     | 0 | 0     | 0   | 1 | 1 | 1 | 1 |
| GO:0017136 | 2  | 2  | 100   | 1.13 | 0 | 0     | 0     | 0 | 0     | 0     | 0 | 0     | 0   | 1 | 1 | 1 | 1 |
| GO:0017139 | 1  | 1  | 100   | 1.13 | 0 | 0     | 0     | 0 | 0     | 0     | 0 | 0     | 0   | 1 | 1 | 1 | 1 |
| GO:0017140 | 3  | 3  | 100   | 1.13 | 0 | 0     | 0     | 0 | 0     | 0     | 0 | 0     | 0   | 1 | 1 | 1 | 1 |
| GO:0017148 | 2  | 1  | 50    | 0.57 | 1 | 50    | 14.32 | 0 | 0     | 0     | 0 | 0     | 0   | 1 | 1 | 1 | 1 |
| GO:0017153 | 6  | 5  | 83.33 | 0.94 | 0 | 0     | 0     | 0 | 0     | 0     | 1 | 16.67 | 4.7 | 1 | 1 | 1 | 1 |
| GO:0017154 | 3  | 1  | 33.33 | 0.38 | 2 | 66.67 | 19.09 | 0 | 0     | 0     | 0 | 0     | 0   | 1 | 1 | 1 | 1 |
| GO:0017156 | 1  | 1  | 100   | 1.13 | 0 | 0     | 0     | 0 | 0     | 0     | 0 | 0     | 0   | 1 | 1 | 1 | 1 |
| GO:0017157 | 3  | 3  | 100   | 1.13 | 0 | 0     | 0     | 0 | 0     | 0     | 0 | 0     | 0   | 1 | 1 | 1 | 1 |



|            |    |    |       |      |   |       |       |   |    |       |   |       |      |   |   |   |   |
|------------|----|----|-------|------|---|-------|-------|---|----|-------|---|-------|------|---|---|---|---|
| GO:0017158 | 1  | 0  | 0     | 0    | 1 | 100   | 28.63 | 0 | 0  | 0     | 0 | 0     | 0    | 1 | 1 | 1 | 1 |
| GO:0017159 | 2  | 1  | 50    | 0.57 | 0 | 0     | 0     | 1 | 50 | 10.76 | 0 | 0     | 0    | 1 | 1 | 1 | 1 |
| GO:0017175 | 1  | 1  | 100   | 1.13 | 0 | 0     | 0     | 0 | 0  | 0     | 0 | 0     | 0    | 1 | 1 | 1 | 1 |
| GO:0017177 | 4  | 4  | 100   | 1.13 | 0 | 0     | 0     | 0 | 0  | 0     | 0 | 0     | 0    | 1 | 1 | 1 | 1 |
| GO:0018008 | 4  | 4  | 100   | 1.13 | 0 | 0     | 0     | 0 | 0  | 0     | 0 | 0     | 0    | 1 | 1 | 1 | 1 |
| GO:0018105 | 1  | 0  | 0     | 0    | 1 | 100   | 28.63 | 0 | 0  | 0     | 0 | 0     | 0    | 1 | 1 | 1 | 1 |
| GO:0018107 | 1  | 0  | 0     | 0    | 1 | 100   | 28.63 | 0 | 0  | 0     | 0 | 0     | 0    | 1 | 1 | 1 | 1 |
| GO:0018108 | 9  | 8  | 88.89 | 1.01 | 1 | 11.11 | 3.18  | 0 | 0  | 0     | 0 | 0     | 0    | 1 | 1 | 1 | 1 |
| GO:0018149 | 9  | 6  | 66.67 | 0.75 | 2 | 22.22 | 6.36  | 0 | 0  | 0     | 1 | 11.11 | 3.14 | 1 | 1 | 1 | 1 |
| GO:0018169 | 1  | 1  | 100   | 1.13 | 0 | 0     | 0     | 0 | 0  | 0     | 0 | 0     | 0    | 1 | 1 | 1 | 1 |
| GO:0018184 | 1  | 1  | 100   | 1.13 | 0 | 0     | 0     | 0 | 0  | 0     | 0 | 0     | 0    | 1 | 1 | 1 | 1 |
| GO:0018223 | 1  | 1  | 100   | 1.13 | 0 | 0     | 0     | 0 | 0  | 0     | 0 | 0     | 0    | 1 | 1 | 1 | 1 |
| GO:0018224 | 1  | 1  | 100   | 1.13 | 0 | 0     | 0     | 0 | 0  | 0     | 0 | 0     | 0    | 1 | 1 | 1 | 1 |
| GO:0018279 | 1  | 1  | 100   | 1.13 | 0 | 0     | 0     | 0 | 0  | 0     | 0 | 0     | 0    | 1 | 1 | 1 | 1 |
| GO:0018346 | 8  | 8  | 100   | 1.13 | 0 | 0     | 0     | 0 | 0  | 0     | 0 | 0     | 0    | 1 | 1 | 1 | 1 |
| GO:0018347 | 2  | 2  | 100   | 1.13 | 0 | 0     | 0     | 0 | 0  | 0     | 0 | 0     | 0    | 1 | 1 | 1 | 1 |
| GO:0018392 | 4  | 4  | 100   | 1.13 | 0 | 0     | 0     | 0 | 0  | 0     | 0 | 0     | 0    | 1 | 1 | 1 | 1 |
| GO:0018401 | 12 | 12 | 100   | 1.13 | 0 | 0     | 0     | 0 | 0  | 0     | 0 | 0     | 0    | 1 | 1 | 1 | 1 |
| GO:0018421 | 2  | 2  | 100   | 1.13 | 0 | 0     | 0     | 0 | 0  | 0     | 0 | 0     | 0    | 1 | 1 | 1 | 1 |
| GO:0018422 | 2  | 2  | 100   | 1.13 | 0 | 0     | 0     | 0 | 0  | 0     | 0 | 0     | 0    | 1 | 1 | 1 | 1 |
| GO:0018423 | 3  | 3  | 100   | 1.13 | 0 | 0     | 0     | 0 | 0  | 0     | 0 | 0     | 0    | 1 | 1 | 1 | 1 |
| GO:0018451 | 5  | 1  | 20    | 0.23 | 1 | 20    | 5.73  | 2 | 40 | 8.61  | 1 | 20    | 5.64 | 1 | 1 | 1 | 1 |
| GO:0018452 | 5  | 1  | 20    | 0.23 | 1 | 20    | 5.73  | 2 | 40 | 8.61  | 1 | 20    | 5.64 | 1 | 1 | 1 | 1 |
| GO:0018453 | 5  | 1  | 20    | 0.23 | 1 | 20    | 5.73  | 2 | 40 | 8.61  | 1 | 20    | 5.64 | 1 | 1 | 1 | 1 |
| GO:0018707 | 3  | 3  | 100   | 1.13 | 0 | 0     | 0     | 0 | 0  | 0     | 0 | 0     | 0    | 1 | 1 | 1 | 1 |
| GO:0018715 | 4  | 4  | 100   | 1.13 | 0 | 0     | 0     | 0 | 0  | 0     | 0 | 0     | 0    | 1 | 1 | 1 | 1 |
| GO:0018716 | 4  | 4  | 100   | 1.13 | 0 | 0     | 0     | 0 | 0  | 0     | 0 | 0     | 0    | 1 | 1 | 1 | 1 |
| GO:0018717 | 4  | 4  | 100   | 1.13 | 0 | 0     | 0     | 0 | 0  | 0     | 0 | 0     | 0    | 1 | 1 | 1 | 1 |
| GO:0018718 | 4  | 4  | 100   | 1.13 | 0 | 0     | 0     | 0 | 0  | 0     | 0 | 0     | 0    | 1 | 1 | 1 | 1 |
| GO:0018720 | 17 | 17 | 100   | 1.13 | 0 | 0     | 0     | 0 | 0  | 0     | 0 | 0     | 0    | 1 | 1 | 1 | 1 |
| GO:0018721 | 1  | 1  | 100   | 1.13 | 0 | 0     | 0     | 0 | 0  | 0     | 0 | 0     | 0    | 1 | 1 | 1 | 1 |
| GO:0018722 | 1  | 1  | 100   | 1.13 | 0 | 0     | 0     | 0 | 0  | 0     | 0 | 0     | 0    | 1 | 1 | 1 | 1 |
| GO:0018723 | 1  | 1  | 100   | 1.13 | 0 | 0     | 0     | 0 | 0  | 0     | 0 | 0     | 0    | 1 | 1 | 1 | 1 |
| GO:0018724 | 1  | 1  | 100   | 1.13 | 0 | 0     | 0     | 0 | 0  | 0     | 0 | 0     | 0    | 1 | 1 | 1 | 1 |
| GO:0018725 | 1  | 1  | 100   | 1.13 | 0 | 0     | 0     | 0 | 0  | 0     | 0 | 0     | 0    | 1 | 1 | 1 | 1 |
| GO:0018726 | 1  | 1  | 100   | 1.13 | 0 | 0     | 0     | 0 | 0  | 0     | 0 | 0     | 0    | 1 | 1 | 1 | 1 |
| GO:0018727 | 1  | 1  | 100   | 1.13 | 0 | 0     | 0     | 0 | 0  | 0     | 0 | 0     | 0    | 1 | 1 | 1 | 1 |
| GO:0018731 | 2  | 2  | 100   | 1.13 | 0 | 0     | 0     | 0 | 0  | 0     | 0 | 0     | 0    | 1 | 1 | 1 | 1 |
| GO:0018732 | 2  | 2  | 100   | 1.13 | 0 | 0     | 0     | 0 | 0  | 0     | 0 | 0     | 0    | 1 | 1 | 1 | 1 |
| GO:0018733 | 2  | 2  | 100   | 1.13 | 0 | 0     | 0     | 0 | 0  | 0     | 0 | 0     | 0    | 1 | 1 | 1 | 1 |
| GO:0018734 | 2  | 2  | 100   | 1.13 | 0 | 0     | 0     | 0 | 0  | 0     | 0 | 0     | 0    | 1 | 1 | 1 | 1 |

|            |    |    |       |      |   |       |      |   |      |       |   |       |       |   |   |   |   |
|------------|----|----|-------|------|---|-------|------|---|------|-------|---|-------|-------|---|---|---|---|
| GO:0018736 | 1  | 1  | 100   | 1.13 | 0 | 0     | 0    | 0 | 0    | 0     | 0 | 0     | 0     | 1 | 1 | 1 | 1 |
| GO:0018737 | 1  | 1  | 100   | 1.13 | 0 | 0     | 0    | 0 | 0    | 0     | 0 | 0     | 0     | 1 | 1 | 1 | 1 |
| GO:0018748 | 2  | 1  | 50    | 0.57 | 0 | 0     | 0    | 1 | 50   | 10.76 | 0 | 0     | 0     | 1 | 1 | 1 | 1 |
| GO:0018749 | 2  | 1  | 50    | 0.57 | 0 | 0     | 0    | 1 | 50   | 10.76 | 0 | 0     | 0     | 1 | 1 | 1 | 1 |
| GO:0018874 | 1  | 0  | 0     | 0    | 0 | 0     | 0    | 1 | 100  | 21.53 | 0 | 0     | 0     | 1 | 1 | 1 | 1 |
| GO:0019001 | 5  | 5  | 100   | 1.13 | 0 | 0     | 0    | 0 | 0    | 0     | 0 | 0     | 0     | 1 | 1 | 1 | 1 |
| GO:0019004 | 1  | 1  | 100   | 1.13 | 0 | 0     | 0    | 0 | 0    | 0     | 0 | 0     | 0     | 1 | 1 | 1 | 1 |
| GO:0019005 | 4  | 3  | 75    | 0.85 | 0 | 0     | 0    | 0 | 0    | 0     | 1 | 25    | 7.06  | 1 | 1 | 1 | 1 |
| GO:0019007 | 2  | 2  | 100   | 1.13 | 0 | 0     | 0    | 0 | 0    | 0     | 0 | 0     | 0     | 1 | 1 | 1 | 1 |
| GO:0019013 | 38 | 36 | 94.74 | 1.07 | 0 | 0     | 0    | 2 | 5.26 | 1.13  | 0 | 0     | 0     | 1 | 1 | 1 | 1 |
| GO:0019028 | 6  | 6  | 100   | 1.13 | 0 | 0     | 0    | 0 | 0    | 0     | 0 | 0     | 0     | 1 | 1 | 1 | 1 |
| GO:0019047 | 2  | 2  | 100   | 1.13 | 0 | 0     | 0    | 0 | 0    | 0     | 0 | 0     | 0     | 1 | 1 | 1 | 1 |
| GO:0019048 | 1  | 1  | 100   | 1.13 | 0 | 0     | 0    | 0 | 0    | 0     | 0 | 0     | 0     | 1 | 1 | 1 | 1 |
| GO:0019069 | 5  | 5  | 100   | 1.13 | 0 | 0     | 0    | 0 | 0    | 0     | 0 | 0     | 0     | 1 | 1 | 1 | 1 |
| GO:0019103 | 1  | 1  | 100   | 1.13 | 0 | 0     | 0    | 0 | 0    | 0     | 0 | 0     | 0     | 1 | 1 | 1 | 1 |
| GO:0019104 | 3  | 2  | 66.67 | 0.75 | 1 | 33.33 | 9.54 | 0 | 0    | 0     | 0 | 0     | 0     | 1 | 1 | 1 | 1 |
| GO:0019111 | 1  | 1  | 100   | 1.13 | 0 | 0     | 0    | 0 | 0    | 0     | 0 | 0     | 0     | 1 | 1 | 1 | 1 |
| GO:0019112 | 4  | 4  | 100   | 1.13 | 0 | 0     | 0    | 0 | 0    | 0     | 0 | 0     | 0     | 1 | 1 | 1 | 1 |
| GO:0019143 | 1  | 1  | 100   | 1.13 | 0 | 0     | 0    | 0 | 0    | 0     | 0 | 0     | 0     | 1 | 1 | 1 | 1 |
| GO:0019166 | 1  | 1  | 100   | 1.13 | 0 | 0     | 0    | 0 | 0    | 0     | 0 | 0     | 0     | 1 | 1 | 1 | 1 |
| GO:0019176 | 1  | 1  | 100   | 1.13 | 0 | 0     | 0    | 0 | 0    | 0     | 0 | 0     | 0     | 1 | 1 | 1 | 1 |
| GO:0019177 | 1  | 1  | 100   | 1.13 | 0 | 0     | 0    | 0 | 0    | 0     | 0 | 0     | 0     | 1 | 1 | 1 | 1 |
| GO:0019187 | 4  | 4  | 100   | 1.13 | 0 | 0     | 0    | 0 | 0    | 0     | 0 | 0     | 0     | 1 | 1 | 1 | 1 |
| GO:0019199 | 17 | 17 | 100   | 1.13 | 0 | 0     | 0    | 0 | 0    | 0     | 0 | 0     | 0     | 1 | 1 | 1 | 1 |
| GO:0019208 | 1  | 1  | 100   | 1.13 | 0 | 0     | 0    | 0 | 0    | 0     | 0 | 0     | 0     | 1 | 1 | 1 | 1 |
| GO:0019210 | 1  | 1  | 100   | 1.13 | 0 | 0     | 0    | 0 | 0    | 0     | 0 | 0     | 0     | 1 | 1 | 1 | 1 |
| GO:0019211 | 4  | 4  | 100   | 1.13 | 0 | 0     | 0    | 0 | 0    | 0     | 0 | 0     | 0     | 1 | 1 | 1 | 1 |
| GO:0019212 | 2  | 2  | 100   | 1.13 | 0 | 0     | 0    | 0 | 0    | 0     | 0 | 0     | 0     | 1 | 1 | 1 | 1 |
| GO:0019217 | 4  | 4  | 100   | 1.13 | 0 | 0     | 0    | 0 | 0    | 0     | 0 | 0     | 0     | 1 | 1 | 1 | 1 |
| GO:0019221 | 10 | 10 | 100   | 1.13 | 0 | 0     | 0    | 0 | 0    | 0     | 0 | 0     | 0     | 1 | 1 | 1 | 1 |
| GO:0019222 | 7  | 7  | 100   | 1.13 | 0 | 0     | 0    | 0 | 0    | 0     | 0 | 0     | 0     | 1 | 1 | 1 | 1 |
| GO:0019229 | 2  | 2  | 100   | 1.13 | 0 | 0     | 0    | 0 | 0    | 0     | 0 | 0     | 0     | 1 | 1 | 1 | 1 |
| GO:0019233 | 6  | 3  | 50    | 0.57 | 2 | 33.33 | 9.54 | 0 | 0    | 0     | 1 | 16.67 | 4.7   | 1 | 1 | 1 | 1 |
| GO:0019239 | 1  | 0  | 0     | 0    | 0 | 0     | 0    | 0 | 0    | 0     | 1 | 100   | 28.22 | 1 | 1 | 1 | 1 |
| GO:0019255 | 2  | 2  | 100   | 1.13 | 0 | 0     | 0    | 0 | 0    | 0     | 0 | 0     | 0     | 1 | 1 | 1 | 1 |
| GO:0019276 | 1  | 1  | 100   | 1.13 | 0 | 0     | 0    | 0 | 0    | 0     | 0 | 0     | 0     | 1 | 1 | 1 | 1 |
| GO:0019307 | 2  | 2  | 100   | 1.13 | 0 | 0     | 0    | 0 | 0    | 0     | 0 | 0     | 0     | 1 | 1 | 1 | 1 |
| GO:0019363 | 3  | 3  | 100   | 1.13 | 0 | 0     | 0    | 0 | 0    | 0     | 0 | 0     | 0     | 1 | 1 | 1 | 1 |
| GO:0019370 | 6  | 6  | 100   | 1.13 | 0 | 0     | 0    | 0 | 0    | 0     | 0 | 0     | 0     | 1 | 1 | 1 | 1 |
| GO:0019395 | 1  | 0  | 0     | 0    | 0 | 0     | 0    | 1 | 100  | 21.53 | 0 | 0     | 0     | 1 | 1 | 1 | 1 |
| GO:0019430 | 1  | 1  | 100   | 1.13 | 0 | 0     | 0    | 0 | 0    | 0     | 0 | 0     | 0     | 1 | 1 | 1 | 1 |

|            |    |    |       |      |   |       |      |   |       |       |   |       |       |   |   |             |            |
|------------|----|----|-------|------|---|-------|------|---|-------|-------|---|-------|-------|---|---|-------------|------------|
| GO:0019432 | 1  | 1  | 100   | 1.13 | 0 | 0     | 0    | 0 | 0     | 0     | 0 | 0     | 0     | 1 | 1 | 1           | 1          |
| GO:0019433 | 1  | 1  | 100   | 1.13 | 0 | 0     | 0    | 0 | 0     | 0     | 0 | 0     | 0     | 1 | 1 | 1           | 1          |
| GO:0019478 | 2  | 2  | 100   | 1.13 | 0 | 0     | 0    | 0 | 0     | 0     | 0 | 0     | 0     | 1 | 1 | 1           | 1          |
| GO:0019531 | 1  | 0  | 0     | 0    | 0 | 0     | 0    | 1 | 100   | 21.53 | 0 | 0     | 0     | 1 | 1 | 1           | 1          |
| GO:0019532 | 1  | 0  | 0     | 0    | 0 | 0     | 0    | 1 | 100   | 21.53 | 0 | 0     | 0     | 1 | 1 | 1           | 1          |
| GO:0019538 | 19 | 17 | 89.47 | 1.01 | 0 | 0     | 0    | 2 | 10.53 | 2.27  | 0 | 0     | 0     | 1 | 1 | 1           | 1          |
| GO:0019605 | 1  | 0  | 0     | 0    | 0 | 0     | 0    | 1 | 100   | 21.53 | 0 | 0     | 0     | 1 | 1 | 1           | 1          |
| GO:0019702 | 3  | 3  | 100   | 1.13 | 0 | 0     | 0    | 0 | 0     | 0     | 0 | 0     | 0     | 1 | 1 | 1           | 1          |
| GO:0019717 | 19 | 18 | 94.74 | 1.07 | 0 | 0     | 0    | 0 | 0     | 0     | 1 | 5.26  | 1.49  | 1 | 1 | 1           | 1          |
| GO:0019722 | 4  | 4  | 100   | 1.13 | 0 | 0     | 0    | 0 | 0     | 0     | 0 | 0     | 0     | 1 | 1 | 1           | 1          |
| GO:0019733 | 1  | 0  | 0     | 0    | 0 | 0     | 0    | 1 | 100   | 21.53 | 0 | 0     | 0     | 1 | 1 | 1           | 1          |
| GO:0019752 | 1  | 1  | 100   | 1.13 | 0 | 0     | 0    | 0 | 0     | 0     | 0 | 0     | 0     | 1 | 1 | 1           | 1          |
| GO:0019770 | 3  | 0  | 0     | 0    | 0 | 0     | 0    | 0 | 0     | 0     | 3 | 100   | 28.22 | 1 | 1 | 1           | 0.21002992 |
| GO:0019781 | 4  | 4  | 100   | 1.13 | 0 | 0     | 0    | 0 | 0     | 0     | 0 | 0     | 0     | 1 | 1 | 1           | 1          |
| GO:0019789 | 2  | 2  | 100   | 1.13 | 0 | 0     | 0    | 0 | 0     | 0     | 0 | 0     | 0     | 1 | 1 | 1           | 1          |
| GO:0019807 | 1  | 0  | 0     | 0    | 0 | 0     | 0    | 0 | 0     | 0     | 1 | 100   | 28.22 | 1 | 1 | 1           | 1          |
| GO:0019834 | 7  | 7  | 100   | 1.13 | 0 | 0     | 0    | 0 | 0     | 0     | 0 | 0     | 0     | 1 | 1 | 1           | 1          |
| GO:0019835 | 4  | 1  | 25    | 0.28 | 0 | 0     | 0    | 3 | 75    | 16.15 | 0 | 0     | 0     | 1 | 1 | 1           | 1          |
| GO:0019838 | 11 | 9  | 81.82 | 0.93 | 1 | 9.09  | 2.6  | 0 | 0     | 0     | 1 | 9.09  | 2.57  | 1 | 1 | 1           | 1          |
| GO:0019839 | 7  | 6  | 85.71 | 0.97 | 1 | 14.29 | 4.09 | 0 | 0     | 0     | 0 | 0     | 0     | 1 | 1 | 1           | 1          |
| GO:0019843 | 5  | 5  | 100   | 1.13 | 0 | 0     | 0    | 0 | 0     | 0     | 0 | 0     | 0     | 1 | 1 | 1           | 1          |
| GO:0019863 | 6  | 5  | 83.33 | 0.94 | 0 | 0     | 0    | 0 | 0     | 0     | 1 | 16.67 | 4.7   | 1 | 1 | 1           | 1          |
| GO:0019864 | 9  | 3  | 33.33 | 0.38 | 0 | 0     | 0    | 3 | 33.33 | 7.18  | 3 | 33.33 | 9.41  | 1 | 1 | 1           | 1          |
| GO:0019866 | 47 | 46 | 97.87 | 1.11 | 0 | 0     | 0    | 1 | 2.13  | 0.46  | 0 | 0     | 0     | 1 | 1 | 1           | 1          |
| GO:0019867 | 26 | 26 | 100   | 1.13 | 0 | 0     | 0    | 0 | 0     | 0     | 0 | 0     | 0     | 1 | 1 | 1           | 1          |
| GO:0019882 | 6  | 4  | 66.67 | 0.75 | 0 | 0     | 0    | 2 | 33.33 | 7.18  | 0 | 0     | 0     | 1 | 1 | 1           | 1          |
| GO:0019883 | 7  | 7  | 100   | 1.13 | 0 | 0     | 0    | 0 | 0     | 0     | 0 | 0     | 0     | 1 | 1 | 1           | 1          |
| GO:0019884 | 10 | 5  | 50    | 0.57 | 0 | 0     | 0    | 5 | 50    | 10.76 | 0 | 0     | 0     | 1 | 1 | 0.216534029 | 1          |
| GO:0019885 | 8  | 8  | 100   | 1.13 | 0 | 0     | 0    | 0 | 0     | 0     | 0 | 0     | 0     | 1 | 1 | 1           | 1          |
| GO:0019886 | 11 | 6  | 54.55 | 0.62 | 0 | 0     | 0    | 5 | 45.45 | 9.78  | 0 | 0     | 0     | 1 | 1 | 0.380704074 | 1          |
| GO:0019897 | 7  | 6  | 85.71 | 0.97 | 0 | 0     | 0    | 0 | 0     | 0     | 1 | 14.29 | 4.03  | 1 | 1 | 1           | 1          |
| GO:0019898 | 1  | 1  | 100   | 1.13 | 0 | 0     | 0    | 0 | 0     | 0     | 0 | 0     | 0     | 1 | 1 | 1           | 1          |
| GO:0019899 | 2  | 2  | 100   | 1.13 | 0 | 0     | 0    | 0 | 0     | 0     | 0 | 0     | 0     | 1 | 1 | 1           | 1          |
| GO:0019900 | 2  | 2  | 100   | 1.13 | 0 | 0     | 0    | 0 | 0     | 0     | 0 | 0     | 0     | 1 | 1 | 1           | 1          |
| GO:0019901 | 2  | 1  | 50    | 0.57 | 0 | 0     | 0    | 0 | 0     | 0     | 1 | 50    | 14.11 | 1 | 1 | 1           | 1          |
| GO:0019904 | 16 | 14 | 87.5  | 0.99 | 0 | 0     | 0    | 2 | 12.5  | 2.69  | 0 | 0     | 0     | 1 | 1 | 1           | 1          |
| GO:0019905 | 6  | 6  | 100   | 1.13 | 0 | 0     | 0    | 0 | 0     | 0     | 0 | 0     | 0     | 1 | 1 | 1           | 1          |
| GO:0019911 | 1  | 1  | 100   | 1.13 | 0 | 0     | 0    | 0 | 0     | 0     | 0 | 0     | 0     | 1 | 1 | 1           | 1          |
| GO:0019912 | 17 | 17 | 100   | 1.13 | 0 | 0     | 0    | 0 | 0     | 0     | 0 | 0     | 0     | 1 | 1 | 1           | 1          |
| GO:0019913 | 17 | 17 | 100   | 1.13 | 0 | 0     | 0    | 0 | 0     | 0     | 0 | 0     | 0     | 1 | 1 | 1           | 1          |
| GO:0019914 | 17 | 17 | 100   | 1.13 | 0 | 0     | 0    | 0 | 0     | 0     | 0 | 0     | 0     | 1 | 1 | 1           | 1          |

|            |     |     |       |      |   |       |       |   |       |       |   |       |       |   |   |   |
|------------|-----|-----|-------|------|---|-------|-------|---|-------|-------|---|-------|-------|---|---|---|
| GO:0019933 | 1   | 1   | 100   | 1.13 | 0 | 0     | 0     | 0 | 0     | 0     | 0 | 0     | 1     | 1 | 1 | 1 |
| GO:0019942 | 2   | 2   | 100   | 1.13 | 0 | 0     | 0     | 0 | 0     | 0     | 0 | 0     | 1     | 1 | 1 | 1 |
| GO:0019955 | 7   | 5   | 71.43 | 0.81 | 1 | 14.29 | 4.09  | 0 | 0     | 0     | 1 | 14.29 | 4.03  | 1 | 1 | 1 |
| GO:0019966 | 1   | 1   | 100   | 1.13 | 0 | 0     | 0     | 0 | 0     | 0     | 0 | 0     | 0     | 1 | 1 | 1 |
| GO:0019984 | 1   | 1   | 100   | 1.13 | 0 | 0     | 0     | 0 | 0     | 0     | 0 | 0     | 0     | 1 | 1 | 1 |
| GO:0019986 | 1   | 1   | 100   | 1.13 | 0 | 0     | 0     | 0 | 0     | 0     | 0 | 0     | 0     | 1 | 1 | 1 |
| GO:0019992 | 28  | 27  | 96.43 | 1.09 | 1 | 3.57  | 1.02  | 0 | 0     | 0     | 0 | 0     | 0     | 1 | 1 | 1 |
| GO:0020037 | 143 | 137 | 95.8  | 1.08 | 3 | 2.1   | 0.6   | 3 | 2.1   | 0.45  | 0 | 0     | 0     | 1 | 1 | 1 |
| GO:0030001 | 8   | 7   | 87.5  | 0.99 | 0 | 0     | 0     | 1 | 12.5  | 2.69  | 0 | 0     | 0     | 1 | 1 | 1 |
| GO:0030016 | 1   | 0   | 0     | 0    | 0 | 0     | 0     | 1 | 100   | 21.53 | 0 | 0     | 0     | 1 | 1 | 1 |
| GO:0030017 | 2   | 2   | 100   | 1.13 | 0 | 0     | 0     | 0 | 0     | 0     | 0 | 0     | 0     | 1 | 1 | 1 |
| GO:0030018 | 6   | 6   | 100   | 1.13 | 0 | 0     | 0     | 0 | 0     | 0     | 0 | 0     | 0     | 1 | 1 | 1 |
| GO:0030020 | 31  | 24  | 77.42 | 0.88 | 2 | 6.45  | 1.85  | 5 | 16.13 | 3.47  | 0 | 0     | 0     | 1 | 1 | 1 |
| GO:0030021 | 1   | 0   | 0     | 0    | 0 | 0     | 0     | 0 | 0     | 0     | 1 | 100   | 28.22 | 1 | 1 | 1 |
| GO:0030022 | 1   | 1   | 100   | 1.13 | 0 | 0     | 0     | 0 | 0     | 0     | 0 | 0     | 0     | 1 | 1 | 1 |
| GO:0030023 | 2   | 1   | 50    | 0.57 | 0 | 0     | 0     | 1 | 50    | 10.76 | 0 | 0     | 0     | 1 | 1 | 1 |
| GO:0030027 | 25  | 24  | 96    | 1.09 | 0 | 0     | 0     | 1 | 4     | 0.86  | 0 | 0     | 0     | 1 | 1 | 1 |
| GO:0030029 | 1   | 0   | 0     | 0    | 0 | 0     | 0     | 1 | 100   | 21.53 | 0 | 0     | 0     | 1 | 1 | 1 |
| GO:0030032 | 7   | 7   | 100   | 1.13 | 0 | 0     | 0     | 0 | 0     | 0     | 0 | 0     | 0     | 1 | 1 | 1 |
| GO:0030033 | 2   | 2   | 100   | 1.13 | 0 | 0     | 0     | 0 | 0     | 0     | 0 | 0     | 0     | 1 | 1 | 1 |
| GO:0030035 | 1   | 1   | 100   | 1.13 | 0 | 0     | 0     | 0 | 0     | 0     | 0 | 0     | 0     | 1 | 1 | 1 |
| GO:0030036 | 27  | 26  | 96.3  | 1.09 | 0 | 0     | 0     | 1 | 3.7   | 0.8   | 0 | 0     | 0     | 1 | 1 | 1 |
| GO:0030041 | 2   | 2   | 100   | 1.13 | 0 | 0     | 0     | 0 | 0     | 0     | 0 | 0     | 0     | 1 | 1 | 1 |
| GO:0030048 | 7   | 6   | 85.71 | 0.97 | 0 | 0     | 0     | 1 | 14.29 | 3.08  | 0 | 0     | 0     | 1 | 1 | 1 |
| GO:0030057 | 1   | 1   | 100   | 1.13 | 0 | 0     | 0     | 0 | 0     | 0     | 0 | 0     | 0     | 1 | 1 | 1 |
| GO:0030060 | 5   | 5   | 100   | 1.13 | 0 | 0     | 0     | 0 | 0     | 0     | 0 | 0     | 0     | 1 | 1 | 1 |
| GO:0030071 | 3   | 1   | 33.33 | 0.38 | 0 | 0     | 0     | 2 | 66.67 | 14.35 | 0 | 0     | 0     | 1 | 1 | 1 |
| GO:0030073 | 4   | 1   | 25    | 0.28 | 0 | 0     | 0     | 2 | 50    | 10.76 | 1 | 25    | 7.06  | 1 | 1 | 1 |
| GO:0030089 | 3   | 3   | 100   | 1.13 | 0 | 0     | 0     | 0 | 0     | 0     | 0 | 0     | 0     | 1 | 1 | 1 |
| GO:0030097 | 16  | 14  | 87.5  | 0.99 | 1 | 6.25  | 1.79  | 0 | 0     | 0     | 1 | 6.25  | 1.76  | 1 | 1 | 1 |
| GO:0030098 | 6   | 6   | 100   | 1.13 | 0 | 0     | 0     | 0 | 0     | 0     | 0 | 0     | 0     | 1 | 1 | 1 |
| GO:0030099 | 3   | 2   | 66.67 | 0.75 | 0 | 0     | 0     | 0 | 0     | 0     | 1 | 33.33 | 9.41  | 1 | 1 | 1 |
| GO:0030100 | 6   | 6   | 100   | 1.13 | 0 | 0     | 0     | 0 | 0     | 0     | 0 | 0     | 0     | 1 | 1 | 1 |
| GO:0030101 | 1   | 0   | 0     | 0    | 1 | 100   | 28.63 | 0 | 0     | 0     | 0 | 0     | 0     | 1 | 1 | 1 |
| GO:0030106 | 7   | 7   | 100   | 1.13 | 0 | 0     | 0     | 0 | 0     | 0     | 0 | 0     | 0     | 1 | 1 | 1 |
| GO:0030111 | 5   | 3   | 60    | 0.68 | 0 | 0     | 0     | 1 | 20    | 4.31  | 1 | 20    | 5.64  | 1 | 1 | 1 |
| GO:0030116 | 1   | 1   | 100   | 1.13 | 0 | 0     | 0     | 0 | 0     | 0     | 0 | 0     | 0     | 1 | 1 | 1 |
| GO:0030117 | 3   | 3   | 100   | 1.13 | 0 | 0     | 0     | 0 | 0     | 0     | 0 | 0     | 0     | 1 | 1 | 1 |
| GO:0030125 | 28  | 26  | 92.86 | 1.05 | 1 | 3.57  | 1.02  | 1 | 3.57  | 0.77  | 0 | 0     | 0     | 1 | 1 | 1 |
| GO:0030127 | 7   | 7   | 100   | 1.13 | 0 | 0     | 0     | 0 | 0     | 0     | 0 | 0     | 0     | 1 | 1 | 1 |
| GO:0030130 | 2   | 2   | 100   | 1.13 | 0 | 0     | 0     | 0 | 0     | 0     | 0 | 0     | 0     | 1 | 1 | 1 |

|            |    |    |       |      |   |       |      |   |       |      |   |       |       |   |   |   |   |
|------------|----|----|-------|------|---|-------|------|---|-------|------|---|-------|-------|---|---|---|---|
| GO:0030131 | 2  | 2  | 100   | 1.13 | 0 | 0     | 0    | 0 | 0     | 0    | 0 | 0     | 0     | 1 | 1 | 1 | 1 |
| GO:0030134 | 2  | 2  | 100   | 1.13 | 0 | 0     | 0    | 0 | 0     | 0    | 0 | 0     | 0     | 1 | 1 | 1 | 1 |
| GO:0030136 | 2  | 2  | 100   | 1.13 | 0 | 0     | 0    | 0 | 0     | 0    | 0 | 0     | 0     | 1 | 1 | 1 | 1 |
| GO:0030137 | 7  | 7  | 100   | 1.13 | 0 | 0     | 0    | 0 | 0     | 0    | 0 | 0     | 0     | 1 | 1 | 1 | 1 |
| GO:0030139 | 18 | 18 | 100   | 1.13 | 0 | 0     | 0    | 0 | 0     | 0    | 0 | 0     | 0     | 1 | 1 | 1 | 1 |
| GO:0030140 | 1  | 1  | 100   | 1.13 | 0 | 0     | 0    | 0 | 0     | 0    | 0 | 0     | 0     | 1 | 1 | 1 | 1 |
| GO:0030141 | 19 | 17 | 89.47 | 1.01 | 0 | 0     | 0    | 2 | 10.53 | 2.27 | 0 | 0     | 0     | 1 | 1 | 1 | 1 |
| GO:0030145 | 40 | 37 | 92.5  | 1.05 | 0 | 0     | 0    | 2 | 5     | 1.08 | 1 | 2.5   | 0.71  | 1 | 1 | 1 | 1 |
| GO:0030148 | 3  | 3  | 100   | 1.13 | 0 | 0     | 0    | 0 | 0     | 0    | 0 | 0     | 0     | 1 | 1 | 1 | 1 |
| GO:0030149 | 4  | 4  | 100   | 1.13 | 0 | 0     | 0    | 0 | 0     | 0    | 0 | 0     | 0     | 1 | 1 | 1 | 1 |
| GO:0030151 | 7  | 2  | 28.57 | 0.32 | 1 | 14.29 | 4.09 | 2 | 28.57 | 6.15 | 2 | 28.57 | 8.06  | 1 | 1 | 1 | 1 |
| GO:0030154 | 37 | 35 | 94.59 | 1.07 | 1 | 2.7   | 0.77 | 1 | 2.7   | 0.58 | 0 | 0     | 0     | 1 | 1 | 1 | 1 |
| GO:0030155 | 6  | 6  | 100   | 1.13 | 0 | 0     | 0    | 0 | 0     | 0    | 0 | 0     | 0     | 1 | 1 | 1 | 1 |
| GO:0030159 | 3  | 2  | 66.67 | 0.75 | 0 | 0     | 0    | 1 | 33.33 | 7.18 | 0 | 0     | 0     | 1 | 1 | 1 | 1 |
| GO:0030161 | 4  | 4  | 100   | 1.13 | 0 | 0     | 0    | 0 | 0     | 0    | 0 | 0     | 0     | 1 | 1 | 1 | 1 |
| GO:0030162 | 2  | 0  | 0     | 0    | 0 | 0     | 0    | 0 | 0     | 0    | 2 | 100   | 28.22 | 1 | 1 | 1 | 1 |
| GO:0030163 | 37 | 37 | 100   | 1.13 | 0 | 0     | 0    | 0 | 0     | 0    | 0 | 0     | 0     | 1 | 1 | 1 | 1 |
| GO:0030165 | 2  | 2  | 100   | 1.13 | 0 | 0     | 0    | 0 | 0     | 0    | 0 | 0     | 0     | 1 | 1 | 1 | 1 |
| GO:0030166 | 1  | 1  | 100   | 1.13 | 0 | 0     | 0    | 0 | 0     | 0    | 0 | 0     | 0     | 1 | 1 | 1 | 1 |
| GO:0030168 | 3  | 2  | 66.67 | 0.75 | 0 | 0     | 0    | 1 | 33.33 | 7.18 | 0 | 0     | 0     | 1 | 1 | 1 | 1 |
| GO:0030170 | 3  | 3  | 100   | 1.13 | 0 | 0     | 0    | 0 | 0     | 0    | 0 | 0     | 0     | 1 | 1 | 1 | 1 |
| GO:0030173 | 10 | 10 | 100   | 1.13 | 0 | 0     | 0    | 0 | 0     | 0    | 0 | 0     | 0     | 1 | 1 | 1 | 1 |
| GO:0030175 | 1  | 1  | 100   | 1.13 | 0 | 0     | 0    | 0 | 0     | 0    | 0 | 0     | 0     | 1 | 1 | 1 | 1 |
| GO:0030176 | 7  | 7  | 100   | 1.13 | 0 | 0     | 0    | 0 | 0     | 0    | 0 | 0     | 0     | 1 | 1 | 1 | 1 |
| GO:0030178 | 2  | 2  | 100   | 1.13 | 0 | 0     | 0    | 0 | 0     | 0    | 0 | 0     | 0     | 1 | 1 | 1 | 1 |
| GO:0030179 | 1  | 1  | 100   | 1.13 | 0 | 0     | 0    | 0 | 0     | 0    | 0 | 0     | 0     | 1 | 1 | 1 | 1 |
| GO:0030182 | 13 | 13 | 100   | 1.13 | 0 | 0     | 0    | 0 | 0     | 0    | 0 | 0     | 0     | 1 | 1 | 1 | 1 |
| GO:0030183 | 8  | 5  | 62.5  | 0.71 | 0 | 0     | 0    | 2 | 25    | 5.38 | 1 | 12.5  | 3.53  | 1 | 1 | 1 | 1 |
| GO:0030188 | 2  | 2  | 100   | 1.13 | 0 | 0     | 0    | 0 | 0     | 0    | 0 | 0     | 0     | 1 | 1 | 1 | 1 |
| GO:0030192 | 1  | 1  | 100   | 1.13 | 0 | 0     | 0    | 0 | 0     | 0    | 0 | 0     | 0     | 1 | 1 | 1 | 1 |
| GO:0030195 | 1  | 0  | 0     | 0    | 0 | 0     | 0    | 0 | 0     | 0    | 1 | 100   | 28.22 | 1 | 1 | 1 | 1 |
| GO:0030198 | 3  | 2  | 66.67 | 0.75 | 0 | 0     | 0    | 0 | 0     | 0    | 1 | 33.33 | 9.41  | 1 | 1 | 1 | 1 |
| GO:0030199 | 1  | 1  | 100   | 1.13 | 0 | 0     | 0    | 0 | 0     | 0    | 0 | 0     | 0     | 1 | 1 | 1 | 1 |
| GO:0030201 | 1  | 1  | 100   | 1.13 | 0 | 0     | 0    | 0 | 0     | 0    | 0 | 0     | 0     | 1 | 1 | 1 | 1 |
| GO:0030202 | 2  | 2  | 100   | 1.13 | 0 | 0     | 0    | 0 | 0     | 0    | 0 | 0     | 0     | 1 | 1 | 1 | 1 |
| GO:0030206 | 1  | 1  | 100   | 1.13 | 0 | 0     | 0    | 0 | 0     | 0    | 0 | 0     | 0     | 1 | 1 | 1 | 1 |
| GO:0030210 | 1  | 1  | 100   | 1.13 | 0 | 0     | 0    | 0 | 0     | 0    | 0 | 0     | 0     | 1 | 1 | 1 | 1 |
| GO:0030216 | 9  | 4  | 44.44 | 0.5  | 2 | 22.22 | 6.36 | 1 | 11.11 | 2.39 | 2 | 22.22 | 6.27  | 1 | 1 | 1 | 1 |
| GO:0030217 | 3  | 3  | 100   | 1.13 | 0 | 0     | 0    | 0 | 0     | 0    | 0 | 0     | 0     | 1 | 1 | 1 | 1 |
| GO:0030218 | 4  | 4  | 100   | 1.13 | 0 | 0     | 0    | 0 | 0     | 0    | 0 | 0     | 0     | 1 | 1 | 1 | 1 |
| GO:0030224 | 1  | 1  | 100   | 1.13 | 0 | 0     | 0    | 0 | 0     | 0    | 0 | 0     | 0     | 1 | 1 | 1 | 1 |

|            |    |    |       |      |   |       |      |   |       |       |   |       |       |   |   |   |
|------------|----|----|-------|------|---|-------|------|---|-------|-------|---|-------|-------|---|---|---|
| GO:0030225 | 3  | 3  | 100   | 1.13 | 0 | 0     | 0    | 0 | 0     | 0     | 0 | 0     | 1     | 1 | 1 | 1 |
| GO:0030226 | 1  | 1  | 100   | 1.13 | 0 | 0     | 0    | 0 | 0     | 0     | 0 | 0     | 1     | 1 | 1 | 1 |
| GO:0030234 | 5  | 3  | 60    | 0.68 | 1 | 20    | 5.73 | 1 | 20    | 4.31  | 0 | 0     | 1     | 1 | 1 | 1 |
| GO:0030236 | 1  | 0  | 0     | 0    | 0 | 0     | 0    | 0 | 0     | 0     | 1 | 100   | 28.22 | 1 | 1 | 1 |
| GO:0030238 | 1  | 1  | 100   | 1.13 | 0 | 0     | 0    | 0 | 0     | 0     | 0 | 0     | 1     | 1 | 1 | 1 |
| GO:0030246 | 6  | 6  | 100   | 1.13 | 0 | 0     | 0    | 0 | 0     | 0     | 0 | 0     | 1     | 1 | 1 | 1 |
| GO:0030250 | 1  | 1  | 100   | 1.13 | 0 | 0     | 0    | 0 | 0     | 0     | 0 | 0     | 1     | 1 | 1 | 1 |
| GO:0030261 | 1  | 1  | 100   | 1.13 | 0 | 0     | 0    | 0 | 0     | 0     | 0 | 0     | 1     | 1 | 1 | 1 |
| GO:0030264 | 1  | 1  | 100   | 1.13 | 0 | 0     | 0    | 0 | 0     | 0     | 0 | 0     | 1     | 1 | 1 | 1 |
| GO:0030276 | 5  | 5  | 100   | 1.13 | 0 | 0     | 0    | 0 | 0     | 0     | 0 | 0     | 1     | 1 | 1 | 1 |
| GO:0030278 | 4  | 4  | 100   | 1.13 | 0 | 0     | 0    | 0 | 0     | 0     | 0 | 0     | 1     | 1 | 1 | 1 |
| GO:0030282 | 3  | 3  | 100   | 1.13 | 0 | 0     | 0    | 0 | 0     | 0     | 0 | 0     | 1     | 1 | 1 | 1 |
| GO:0030285 | 4  | 3  | 75    | 0.85 | 1 | 25    | 7.16 | 0 | 0     | 0     | 0 | 0     | 1     | 1 | 1 | 1 |
| GO:0030286 | 12 | 12 | 100   | 1.13 | 0 | 0     | 0    | 0 | 0     | 0     | 0 | 0     | 1     | 1 | 1 | 1 |
| GO:0030288 | 2  | 2  | 100   | 1.13 | 0 | 0     | 0    | 0 | 0     | 0     | 0 | 0     | 1     | 1 | 1 | 1 |
| GO:0030295 | 1  | 1  | 100   | 1.13 | 0 | 0     | 0    | 0 | 0     | 0     | 0 | 0     | 1     | 1 | 1 | 1 |
| GO:0030300 | 5  | 5  | 100   | 1.13 | 0 | 0     | 0    | 0 | 0     | 0     | 0 | 0     | 1     | 1 | 1 | 1 |
| GO:0030304 | 2  | 0  | 0     | 0    | 0 | 0     | 0    | 0 | 0     | 0     | 2 | 100   | 28.22 | 1 | 1 | 1 |
| GO:0030306 | 2  | 2  | 100   | 1.13 | 0 | 0     | 0    | 0 | 0     | 0     | 0 | 0     | 1     | 1 | 1 | 1 |
| GO:0030308 | 6  | 6  | 100   | 1.13 | 0 | 0     | 0    | 0 | 0     | 0     | 0 | 0     | 1     | 1 | 1 | 1 |
| GO:0030311 | 1  | 1  | 100   | 1.13 | 0 | 0     | 0    | 0 | 0     | 0     | 0 | 0     | 1     | 1 | 1 | 1 |
| GO:0030316 | 2  | 2  | 100   | 1.13 | 0 | 0     | 0    | 0 | 0     | 0     | 0 | 0     | 1     | 1 | 1 | 1 |
| GO:0030317 | 4  | 3  | 75    | 0.85 | 0 | 0     | 0    | 0 | 0     | 0     | 1 | 25    | 7.06  | 1 | 1 | 1 |
| GO:0030318 | 2  | 2  | 100   | 1.13 | 0 | 0     | 0    | 0 | 0     | 0     | 0 | 0     | 1     | 1 | 1 | 1 |
| GO:0030320 | 1  | 0  | 0     | 0    | 0 | 0     | 0    | 1 | 100   | 21.53 | 0 | 0     | 0     | 1 | 1 | 1 |
| GO:0030321 | 1  | 1  | 100   | 1.13 | 0 | 0     | 0    | 0 | 0     | 0     | 0 | 0     | 1     | 1 | 1 | 1 |
| GO:0030323 | 1  | 1  | 100   | 1.13 | 0 | 0     | 0    | 0 | 0     | 0     | 0 | 0     | 1     | 1 | 1 | 1 |
| GO:0030324 | 11 | 10 | 90.91 | 1.03 | 0 | 0     | 0    | 1 | 9.09  | 1.96  | 0 | 0     | 0     | 1 | 1 | 1 |
| GO:0030326 | 4  | 4  | 100   | 1.13 | 0 | 0     | 0    | 0 | 0     | 0     | 0 | 0     | 1     | 1 | 1 | 1 |
| GO:0030327 | 3  | 2  | 66.67 | 0.75 | 1 | 33.33 | 9.54 | 0 | 0     | 0     | 0 | 0     | 1     | 1 | 1 | 1 |
| GO:0030328 | 3  | 3  | 100   | 1.13 | 0 | 0     | 0    | 0 | 0     | 0     | 0 | 0     | 1     | 1 | 1 | 1 |
| GO:0030329 | 2  | 2  | 100   | 1.13 | 0 | 0     | 0    | 0 | 0     | 0     | 0 | 0     | 1     | 1 | 1 | 1 |
| GO:0030330 | 1  | 1  | 100   | 1.13 | 0 | 0     | 0    | 0 | 0     | 0     | 0 | 0     | 1     | 1 | 1 | 1 |
| GO:0030332 | 1  | 1  | 100   | 1.13 | 0 | 0     | 0    | 0 | 0     | 0     | 0 | 0     | 1     | 1 | 1 | 1 |
| GO:0030333 | 3  | 1  | 33.33 | 0.38 | 0 | 0     | 0    | 2 | 66.67 | 14.35 | 0 | 0     | 0     | 1 | 1 | 1 |
| GO:0030334 | 5  | 3  | 60    | 0.68 | 1 | 20    | 5.73 | 0 | 0     | 0     | 1 | 20    | 5.64  | 1 | 1 | 1 |
| GO:0030335 | 3  | 2  | 66.67 | 0.75 | 0 | 0     | 0    | 0 | 0     | 0     | 1 | 33.33 | 9.41  | 1 | 1 | 1 |
| GO:0030336 | 2  | 2  | 100   | 1.13 | 0 | 0     | 0    | 0 | 0     | 0     | 0 | 0     | 1     | 1 | 1 | 1 |
| GO:0030337 | 3  | 3  | 100   | 1.13 | 0 | 0     | 0    | 0 | 0     | 0     | 0 | 0     | 1     | 1 | 1 | 1 |
| GO:0030346 | 1  | 1  | 100   | 1.13 | 0 | 0     | 0    | 0 | 0     | 0     | 0 | 0     | 1     | 1 | 1 | 1 |
| GO:0030350 | 4  | 4  | 100   | 1.13 | 0 | 0     | 0    | 0 | 0     | 0     | 0 | 0     | 1     | 1 | 1 | 1 |

|            |    |    |       |      |   |       |       |   |       |      |   |       |       |   |             |   |   |
|------------|----|----|-------|------|---|-------|-------|---|-------|------|---|-------|-------|---|-------------|---|---|
| GO:0030355 | 1  | 1  | 100   | 1.13 | 0 | 0     | 0     | 0 | 0     | 0    | 0 | 0     | 0     | 1 | 1           | 1 | 1 |
| GO:0030368 | 1  | 1  | 100   | 1.13 | 0 | 0     | 0     | 0 | 0     | 0    | 0 | 0     | 0     | 1 | 1           | 1 | 1 |
| GO:0030371 | 1  | 1  | 100   | 1.13 | 0 | 0     | 0     | 0 | 0     | 0    | 0 | 0     | 0     | 1 | 1           | 1 | 1 |
| GO:0030374 | 2  | 2  | 100   | 1.13 | 0 | 0     | 0     | 0 | 0     | 0    | 0 | 0     | 0     | 1 | 1           | 1 | 1 |
| GO:0030377 | 3  | 3  | 100   | 1.13 | 0 | 0     | 0     | 0 | 0     | 0    | 0 | 0     | 0     | 1 | 1           | 1 | 1 |
| GO:0030384 | 3  | 3  | 100   | 1.13 | 0 | 0     | 0     | 0 | 0     | 0    | 0 | 0     | 0     | 1 | 1           | 1 | 1 |
| GO:0030409 | 1  | 1  | 100   | 1.13 | 0 | 0     | 0     | 0 | 0     | 0    | 0 | 0     | 0     | 1 | 1           | 1 | 1 |
| GO:0030412 | 1  | 1  | 100   | 1.13 | 0 | 0     | 0     | 0 | 0     | 0    | 0 | 0     | 0     | 1 | 1           | 1 | 1 |
| GO:0030414 | 2  | 1  | 50    | 0.57 | 0 | 0     | 0     | 0 | 0     | 0    | 1 | 50    | 14.11 | 1 | 1           | 1 | 1 |
| GO:0030424 | 2  | 1  | 50    | 0.57 | 1 | 50    | 14.32 | 0 | 0     | 0    | 0 | 0     | 0     | 1 | 1           | 1 | 1 |
| GO:0030425 | 3  | 3  | 100   | 1.13 | 0 | 0     | 0     | 0 | 0     | 0    | 0 | 0     | 0     | 1 | 1           | 1 | 1 |
| GO:0030426 | 3  | 3  | 100   | 1.13 | 0 | 0     | 0     | 0 | 0     | 0    | 0 | 0     | 0     | 1 | 1           | 1 | 1 |
| GO:0030433 | 9  | 9  | 100   | 1.13 | 0 | 0     | 0     | 0 | 0     | 0    | 0 | 0     | 0     | 1 | 1           | 1 | 1 |
| GO:0030478 | 2  | 1  | 50    | 0.57 | 1 | 50    | 14.32 | 0 | 0     | 0    | 0 | 0     | 0     | 1 | 1           | 1 | 1 |
| GO:0030484 | 2  | 2  | 100   | 1.13 | 0 | 0     | 0     | 0 | 0     | 0    | 0 | 0     | 0     | 1 | 1           | 1 | 1 |
| GO:0030497 | 3  | 3  | 100   | 1.13 | 0 | 0     | 0     | 0 | 0     | 0    | 0 | 0     | 0     | 1 | 1           | 1 | 1 |
| GO:0030501 | 2  | 2  | 100   | 1.13 | 0 | 0     | 0     | 0 | 0     | 0    | 0 | 0     | 0     | 1 | 1           | 1 | 1 |
| GO:0030502 | 1  | 1  | 100   | 1.13 | 0 | 0     | 0     | 0 | 0     | 0    | 0 | 0     | 0     | 1 | 1           | 1 | 1 |
| GO:0030506 | 1  | 0  | 0     | 0    | 1 | 100   | 28.63 | 0 | 0     | 0    | 0 | 0     | 0     | 1 | 1           | 1 | 1 |
| GO:0030509 | 1  | 1  | 100   | 1.13 | 0 | 0     | 0     | 0 | 0     | 0    | 0 | 0     | 0     | 1 | 1           | 1 | 1 |
| GO:0030512 | 3  | 2  | 66.67 | 0.75 | 0 | 0     | 0     | 0 | 0     | 0    | 1 | 33.33 | 9.41  | 1 | 1           | 1 | 1 |
| GO:0030513 | 2  | 2  | 100   | 1.13 | 0 | 0     | 0     | 0 | 0     | 0    | 0 | 0     | 0     | 1 | 1           | 1 | 1 |
| GO:0030514 | 5  | 4  | 80    | 0.91 | 0 | 0     | 0     | 0 | 0     | 0    | 1 | 20    | 5.64  | 1 | 1           | 1 | 1 |
| GO:0030515 | 1  | 1  | 100   | 1.13 | 0 | 0     | 0     | 0 | 0     | 0    | 0 | 0     | 0     | 1 | 1           | 1 | 1 |
| GO:0030519 | 6  | 4  | 66.67 | 0.75 | 0 | 0     | 0     | 2 | 33.33 | 7.18 | 0 | 0     | 0     | 1 | 1           | 1 | 1 |
| GO:0030520 | 1  | 1  | 100   | 1.13 | 0 | 0     | 0     | 0 | 0     | 0    | 0 | 0     | 0     | 1 | 1           | 1 | 1 |
| GO:0030528 | 16 | 14 | 87.5  | 0.99 | 2 | 12.5  | 3.58  | 0 | 0     | 0    | 0 | 0     | 0     | 1 | 1           | 1 | 1 |
| GO:0030529 | 75 | 70 | 93.33 | 1.06 | 0 | 0     | 0     | 5 | 6.67  | 1.44 | 0 | 0     | 0     | 1 | 1           | 1 | 1 |
| GO:0030532 | 3  | 3  | 100   | 1.13 | 0 | 0     | 0     | 0 | 0     | 0    | 0 | 0     | 0     | 1 | 1           | 1 | 1 |
| GO:0030539 | 2  | 0  | 0     | 0    | 0 | 0     | 0     | 0 | 0     | 0    | 2 | 100   | 28.22 | 1 | 1           | 1 | 1 |
| GO:0030544 | 2  | 2  | 100   | 1.13 | 0 | 0     | 0     | 0 | 0     | 0    | 0 | 0     | 0     | 1 | 1           | 1 | 1 |
| GO:0030552 | 6  | 6  | 100   | 1.13 | 0 | 0     | 0     | 0 | 0     | 0    | 0 | 0     | 0     | 1 | 1           | 1 | 1 |
| GO:0030553 | 1  | 1  | 100   | 1.13 | 0 | 0     | 0     | 0 | 0     | 0    | 0 | 0     | 0     | 1 | 1           | 1 | 1 |
| GO:0030574 | 15 | 5  | 33.33 | 0.38 | 5 | 33.33 | 9.54  | 5 | 33.33 | 7.18 | 0 | 0     | 0     | 1 | 0.521704658 | 1 | 1 |
| GO:0030578 | 1  | 1  | 100   | 1.13 | 0 | 0     | 0     | 0 | 0     | 0    | 0 | 0     | 0     | 1 | 1           | 1 | 1 |
| GO:0030593 | 20 | 5  | 25    | 0.28 | 4 | 20    | 5.73  | 6 | 30    | 6.46 | 5 | 25    | 7.06  | 1 | 1           | 1 | 1 |
| GO:0030594 | 6  | 3  | 50    | 0.57 | 1 | 16.67 | 4.77  | 0 | 0     | 0    | 2 | 33.33 | 9.41  | 1 | 1           | 1 | 1 |
| GO:0030595 | 3  | 2  | 66.67 | 0.75 | 0 | 0     | 0     | 1 | 33.33 | 7.18 | 0 | 0     | 0     | 1 | 1           | 1 | 1 |
| GO:0030641 | 1  | 1  | 100   | 1.13 | 0 | 0     | 0     | 0 | 0     | 0    | 0 | 0     | 0     | 1 | 1           | 1 | 1 |
| GO:0030643 | 1  | 1  | 100   | 1.13 | 0 | 0     | 0     | 0 | 0     | 0    | 0 | 0     | 0     | 1 | 1           | 1 | 1 |
| GO:0030659 | 2  | 2  | 100   | 1.13 | 0 | 0     | 0     | 0 | 0     | 0    | 0 | 0     | 0     | 1 | 1           | 1 | 1 |

|            |    |    |       |      |   |      |       |   |       |       |   |       |       |   |   |             |
|------------|----|----|-------|------|---|------|-------|---|-------|-------|---|-------|-------|---|---|-------------|
| GO:0030672 | 3  | 3  | 100   | 1.13 | 0 | 0    | 0     | 0 | 0     | 0     | 0 | 0     | 1     | 1 | 1 | 1           |
| GO:0030674 | 1  | 1  | 100   | 1.13 | 0 | 0    | 0     | 0 | 0     | 0     | 0 | 0     | 1     | 1 | 1 | 1           |
| GO:0030675 | 1  | 1  | 100   | 1.13 | 0 | 0    | 0     | 0 | 0     | 0     | 0 | 0     | 1     | 1 | 1 | 1           |
| GO:0030693 | 14 | 12 | 85.71 | 0.97 | 0 | 0    | 0     | 1 | 7.14  | 1.54  | 1 | 7.14  | 2.02  | 1 | 1 | 1           |
| GO:0030851 | 4  | 4  | 100   | 1.13 | 0 | 0    | 0     | 0 | 0     | 0     | 0 | 0     | 1     | 1 | 1 | 1           |
| GO:0030853 | 1  | 0  | 0     | 0    | 0 | 0    | 0     | 1 | 100   | 21.53 | 0 | 0     | 0     | 1 | 1 | 1           |
| GO:0030856 | 6  | 3  | 50    | 0.57 | 0 | 0    | 0     | 1 | 16.67 | 3.59  | 2 | 33.33 | 9.41  | 1 | 1 | 1           |
| GO:0030866 | 3  | 3  | 100   | 1.13 | 0 | 0    | 0     | 0 | 0     | 0     | 0 | 0     | 1     | 1 | 1 | 1           |
| GO:0030889 | 4  | 0  | 0     | 0    | 0 | 0    | 0     | 4 | 100   | 21.53 | 0 | 0     | 0     | 1 | 1 | 0.021406639 |
| GO:0030890 | 1  | 1  | 100   | 1.13 | 0 | 0    | 0     | 0 | 0     | 0     | 0 | 0     | 1     | 1 | 1 | 1           |
| GO:0030900 | 1  | 1  | 100   | 1.13 | 0 | 0    | 0     | 0 | 0     | 0     | 0 | 0     | 1     | 1 | 1 | 1           |
| GO:0035026 | 3  | 1  | 33.33 | 0.38 | 0 | 0    | 0     | 2 | 66.67 | 14.35 | 0 | 0     | 0     | 1 | 1 | 1           |
| GO:0035035 | 4  | 4  | 100   | 1.13 | 0 | 0    | 0     | 0 | 0     | 0     | 0 | 0     | 1     | 1 | 1 | 1           |
| GO:0040007 | 8  | 4  | 50    | 0.57 | 1 | 12.5 | 3.58  | 2 | 25    | 5.38  | 1 | 12.5  | 3.53  | 1 | 1 | 1           |
| GO:0040008 | 8  | 8  | 100   | 1.13 | 0 | 0    | 0     | 0 | 0     | 0     | 0 | 0     | 1     | 1 | 1 | 1           |
| GO:0040009 | 5  | 5  | 100   | 1.13 | 0 | 0    | 0     | 0 | 0     | 0     | 0 | 0     | 1     | 1 | 1 | 1           |
| GO:0040014 | 4  | 3  | 75    | 0.85 | 1 | 25   | 7.16  | 0 | 0     | 0     | 0 | 0     | 1     | 1 | 1 | 1           |
| GO:0040015 | 1  | 1  | 100   | 1.13 | 0 | 0    | 0     | 0 | 0     | 0     | 0 | 0     | 1     | 1 | 1 | 1           |
| GO:0040016 | 3  | 3  | 100   | 1.13 | 0 | 0    | 0     | 0 | 0     | 0     | 0 | 0     | 1     | 1 | 1 | 1           |
| GO:0040018 | 3  | 2  | 66.67 | 0.75 | 0 | 0    | 0     | 1 | 33.33 | 7.18  | 0 | 0     | 0     | 1 | 1 | 1           |
| GO:0042035 | 5  | 5  | 100   | 1.13 | 0 | 0    | 0     | 0 | 0     | 0     | 0 | 0     | 1     | 1 | 1 | 1           |
| GO:0042036 | 1  | 1  | 100   | 1.13 | 0 | 0    | 0     | 0 | 0     | 0     | 0 | 0     | 1     | 1 | 1 | 1           |
| GO:0042053 | 1  | 1  | 100   | 1.13 | 0 | 0    | 0     | 0 | 0     | 0     | 0 | 0     | 1     | 1 | 1 | 1           |
| GO:0042054 | 4  | 3  | 75    | 0.85 | 1 | 25   | 7.16  | 0 | 0     | 0     | 0 | 0     | 1     | 1 | 1 | 1           |
| GO:0042055 | 1  | 1  | 100   | 1.13 | 0 | 0    | 0     | 0 | 0     | 0     | 0 | 0     | 1     | 1 | 1 | 1           |
| GO:0042060 | 3  | 3  | 100   | 1.13 | 0 | 0    | 0     | 0 | 0     | 0     | 0 | 0     | 1     | 1 | 1 | 1           |
| GO:0042088 | 3  | 3  | 100   | 1.13 | 0 | 0    | 0     | 0 | 0     | 0     | 0 | 0     | 1     | 1 | 1 | 1           |
| GO:0042094 | 2  | 2  | 100   | 1.13 | 0 | 0    | 0     | 0 | 0     | 0     | 0 | 0     | 1     | 1 | 1 | 1           |
| GO:0042098 | 3  | 3  | 100   | 1.13 | 0 | 0    | 0     | 0 | 0     | 0     | 0 | 0     | 1     | 1 | 1 | 1           |
| GO:0042100 | 3  | 3  | 100   | 1.13 | 0 | 0    | 0     | 0 | 0     | 0     | 0 | 0     | 1     | 1 | 1 | 1           |
| GO:0042101 | 1  | 0  | 0     | 0    | 0 | 0    | 0     | 0 | 0     | 0     | 1 | 100   | 28.22 | 1 | 1 | 1           |
| GO:0042102 | 1  | 1  | 100   | 1.13 | 0 | 0    | 0     | 0 | 0     | 0     | 0 | 0     | 1     | 1 | 1 | 1           |
| GO:0042110 | 8  | 7  | 87.5  | 0.99 | 0 | 0    | 0     | 0 | 0     | 0     | 1 | 12.5  | 3.53  | 1 | 1 | 1           |
| GO:0042113 | 6  | 3  | 50    | 0.57 | 0 | 0    | 0     | 1 | 16.67 | 3.59  | 2 | 33.33 | 9.41  | 1 | 1 | 1           |
| GO:0042116 | 1  | 0  | 0     | 0    | 1 | 100  | 28.63 | 0 | 0     | 0     | 0 | 0     | 0     | 1 | 1 | 1           |
| GO:0042127 | 25 | 25 | 100   | 1.13 | 0 | 0    | 0     | 0 | 0     | 0     | 0 | 0     | 1     | 1 | 1 | 1           |
| GO:0042129 | 1  | 1  | 100   | 1.13 | 0 | 0    | 0     | 0 | 0     | 0     | 0 | 0     | 1     | 1 | 1 | 1           |
| GO:0042130 | 1  | 0  | 0     | 0    | 0 | 0    | 0     | 0 | 0     | 0     | 1 | 100   | 28.22 | 1 | 1 | 1           |
| GO:0042132 | 4  | 4  | 100   | 1.13 | 0 | 0    | 0     | 0 | 0     | 0     | 0 | 0     | 1     | 1 | 1 | 1           |
| GO:0042135 | 2  | 1  | 50    | 0.57 | 1 | 50   | 14.32 | 0 | 0     | 0     | 0 | 0     | 0     | 1 | 1 | 1           |
| GO:0042136 | 3  | 3  | 100   | 1.13 | 0 | 0    | 0     | 0 | 0     | 0     | 0 | 0     | 1     | 1 | 1 | 1           |



|            |    |   |       |      |   |       |      |   |       |       |   |       |       |   |   |             |             |
|------------|----|---|-------|------|---|-------|------|---|-------|-------|---|-------|-------|---|---|-------------|-------------|
| GO:0042157 | 8  | 7 | 87.5  | 0.99 | 1 | 12.5  | 3.58 | 0 | 0     | 0     | 0 | 0     | 0     | 1 | 1 | 1           | 1           |
| GO:0042162 | 1  | 1 | 100   | 1.13 | 0 | 0     | 0    | 0 | 0     | 0     | 0 | 0     | 0     | 1 | 1 | 1           | 1           |
| GO:0042167 | 2  | 2 | 100   | 1.13 | 0 | 0     | 0    | 0 | 0     | 0     | 0 | 0     | 0     | 1 | 1 | 1           | 1           |
| GO:0042168 | 3  | 3 | 100   | 1.13 | 0 | 0     | 0    | 0 | 0     | 0     | 0 | 0     | 0     | 1 | 1 | 1           | 1           |
| GO:0042169 | 2  | 0 | 0     | 0    | 0 | 0     | 0    | 2 | 100   | 21.53 | 0 | 0     | 0     | 1 | 1 | 1           | 1           |
| GO:0042171 | 2  | 2 | 100   | 1.13 | 0 | 0     | 0    | 0 | 0     | 0     | 0 | 0     | 0     | 1 | 1 | 1           | 1           |
| GO:0042176 | 5  | 5 | 100   | 1.13 | 0 | 0     | 0    | 0 | 0     | 0     | 0 | 0     | 0     | 1 | 1 | 1           | 1           |
| GO:0042246 | 3  | 2 | 66.67 | 0.75 | 0 | 0     | 0    | 0 | 0     | 0     | 1 | 33.33 | 9.41  | 1 | 1 | 1           | 1           |
| GO:0042254 | 1  | 1 | 100   | 1.13 | 0 | 0     | 0    | 0 | 0     | 0     | 0 | 0     | 0     | 1 | 1 | 1           | 1           |
| GO:0042273 | 3  | 3 | 100   | 1.13 | 0 | 0     | 0    | 0 | 0     | 0     | 0 | 0     | 0     | 1 | 1 | 1           | 1           |
| GO:0042287 | 1  | 1 | 100   | 1.13 | 0 | 0     | 0    | 0 | 0     | 0     | 0 | 0     | 0     | 1 | 1 | 1           | 1           |
| GO:0042288 | 1  | 1 | 100   | 1.13 | 0 | 0     | 0    | 0 | 0     | 0     | 0 | 0     | 0     | 1 | 1 | 1           | 1           |
| GO:0042301 | 3  | 3 | 100   | 1.13 | 0 | 0     | 0    | 0 | 0     | 0     | 0 | 0     | 0     | 1 | 1 | 1           | 1           |
| GO:0042306 | 1  | 1 | 100   | 1.13 | 0 | 0     | 0    | 0 | 0     | 0     | 0 | 0     | 0     | 1 | 1 | 1           | 1           |
| GO:0042383 | 2  | 2 | 100   | 1.13 | 0 | 0     | 0    | 0 | 0     | 0     | 0 | 0     | 0     | 1 | 1 | 1           | 1           |
| GO:0042392 | 2  | 2 | 100   | 1.13 | 0 | 0     | 0    | 0 | 0     | 0     | 0 | 0     | 0     | 1 | 1 | 1           | 1           |
| GO:0042393 | 6  | 6 | 100   | 1.13 | 0 | 0     | 0    | 0 | 0     | 0     | 0 | 0     | 0     | 1 | 1 | 1           | 1           |
| GO:0042416 | 1  | 1 | 100   | 1.13 | 0 | 0     | 0    | 0 | 0     | 0     | 0 | 0     | 0     | 1 | 1 | 1           | 1           |
| GO:0042417 | 1  | 1 | 100   | 1.13 | 0 | 0     | 0    | 0 | 0     | 0     | 0 | 0     | 0     | 1 | 1 | 1           | 1           |
| GO:0042420 | 3  | 2 | 66.67 | 0.75 | 1 | 33.33 | 9.54 | 0 | 0     | 0     | 0 | 0     | 0     | 1 | 1 | 1           | 1           |
| GO:0042423 | 2  | 2 | 100   | 1.13 | 0 | 0     | 0    | 0 | 0     | 0     | 0 | 0     | 0     | 1 | 1 | 1           | 1           |
| GO:0042427 | 1  | 1 | 100   | 1.13 | 0 | 0     | 0    | 0 | 0     | 0     | 0 | 0     | 0     | 1 | 1 | 1           | 1           |
| GO:0042462 | 1  | 1 | 100   | 1.13 | 0 | 0     | 0    | 0 | 0     | 0     | 0 | 0     | 0     | 1 | 1 | 1           | 1           |
| GO:0042472 | 3  | 3 | 100   | 1.13 | 0 | 0     | 0    | 0 | 0     | 0     | 0 | 0     | 0     | 1 | 1 | 1           | 1           |
| GO:0042475 | 4  | 4 | 100   | 1.13 | 0 | 0     | 0    | 0 | 0     | 0     | 0 | 0     | 0     | 1 | 1 | 1           | 1           |
| GO:0042487 | 2  | 2 | 100   | 1.13 | 0 | 0     | 0    | 0 | 0     | 0     | 0 | 0     | 0     | 1 | 1 | 1           | 1           |
| GO:0042488 | 2  | 2 | 100   | 1.13 | 0 | 0     | 0    | 0 | 0     | 0     | 0 | 0     | 0     | 1 | 1 | 1           | 1           |
| GO:0042493 | 4  | 4 | 100   | 1.13 | 0 | 0     | 0    | 0 | 0     | 0     | 0 | 0     | 0     | 1 | 1 | 1           | 1           |
| GO:0042535 | 4  | 1 | 25    | 0.28 | 0 | 0     | 0    | 0 | 0     | 0     | 3 | 75    | 21.17 | 1 | 1 | 1           | 0.815577835 |
| GO:0042542 | 2  | 2 | 100   | 1.13 | 0 | 0     | 0    | 0 | 0     | 0     | 0 | 0     | 0     | 1 | 1 | 1           | 1           |
| GO:0042552 | 7  | 5 | 71.43 | 0.81 | 2 | 28.57 | 8.18 | 0 | 0     | 0     | 0 | 0     | 0     | 1 | 1 | 1           | 1           |
| GO:0042554 | 1  | 1 | 100   | 1.13 | 0 | 0     | 0    | 0 | 0     | 0     | 0 | 0     | 0     | 1 | 1 | 1           | 1           |
| GO:0042564 | 1  | 1 | 100   | 1.13 | 0 | 0     | 0    | 0 | 0     | 0     | 0 | 0     | 0     | 1 | 1 | 1           | 1           |
| GO:0042577 | 3  | 1 | 33.33 | 0.38 | 0 | 0     | 0    | 1 | 33.33 | 7.18  | 1 | 33.33 | 9.41  | 1 | 1 | 1           | 1           |
| GO:0042578 | 4  | 4 | 100   | 1.13 | 0 | 0     | 0    | 0 | 0     | 0     | 0 | 0     | 0     | 1 | 1 | 1           | 1           |
| GO:0042589 | 3  | 3 | 100   | 1.13 | 0 | 0     | 0    | 0 | 0     | 0     | 0 | 0     | 0     | 1 | 1 | 1           | 1           |
| GO:0042590 | 4  | 1 | 25    | 0.28 | 0 | 0     | 0    | 0 | 0     | 0     | 3 | 75    | 21.17 | 1 | 1 | 1           | 0.815577835 |
| GO:0042591 | 14 | 7 | 50    | 0.57 | 0 | 0     | 0    | 7 | 50    | 10.76 | 0 | 0     | 0     | 1 | 1 | 0.006542489 | 1           |
| GO:0042593 | 2  | 2 | 100   | 1.13 | 0 | 0     | 0    | 0 | 0     | 0     | 0 | 0     | 0     | 1 | 1 | 1           | 1           |
| GO:0042598 | 3  | 3 | 100   | 1.13 | 0 | 0     | 0    | 0 | 0     | 0     | 0 | 0     | 0     | 1 | 1 | 1           | 1           |
| GO:0042605 | 6  | 5 | 83.33 | 0.94 | 0 | 0     | 0    | 1 | 16.67 | 3.59  | 0 | 0     | 0     | 1 | 1 | 1           | 1           |

|            |    |    |       |      |   |       |      |   |       |       |   |      |       |   |   |             |   |
|------------|----|----|-------|------|---|-------|------|---|-------|-------|---|------|-------|---|---|-------------|---|
| GO:0042606 | 1  | 1  | 100   | 1.13 | 0 | 0     | 0    | 0 | 0     | 0     | 0 | 0    | 0     | 1 | 1 | 1           | 1 |
| GO:0042607 | 1  | 1  | 100   | 1.13 | 0 | 0     | 0    | 0 | 0     | 0     | 0 | 0    | 0     | 1 | 1 | 1           | 1 |
| GO:0042613 | 4  | 3  | 75    | 0.85 | 0 | 0     | 0    | 1 | 25    | 5.38  | 0 | 0    | 0     | 1 | 1 | 1           | 1 |
| GO:0042623 | 9  | 9  | 100   | 1.13 | 0 | 0     | 0    | 0 | 0     | 0     | 0 | 0    | 0     | 1 | 1 | 1           | 1 |
| GO:0042632 | 3  | 3  | 100   | 1.13 | 0 | 0     | 0    | 0 | 0     | 0     | 0 | 0    | 0     | 1 | 1 | 1           | 1 |
| GO:0042692 | 1  | 1  | 100   | 1.13 | 0 | 0     | 0    | 0 | 0     | 0     | 0 | 0    | 0     | 1 | 1 | 1           | 1 |
| GO:0042733 | 2  | 2  | 100   | 1.13 | 0 | 0     | 0    | 0 | 0     | 0     | 0 | 0    | 0     | 1 | 1 | 1           | 1 |
| GO:0042742 | 4  | 2  | 50    | 0.57 | 0 | 0     | 0    | 1 | 25    | 5.38  | 1 | 25   | 7.06  | 1 | 1 | 1           | 1 |
| GO:0042765 | 1  | 1  | 100   | 1.13 | 0 | 0     | 0    | 0 | 0     | 0     | 0 | 0    | 0     | 1 | 1 | 1           | 1 |
| GO:0042780 | 1  | 1  | 100   | 1.13 | 0 | 0     | 0    | 0 | 0     | 0     | 0 | 0    | 0     | 1 | 1 | 1           | 1 |
| GO:0042787 | 1  | 1  | 100   | 1.13 | 0 | 0     | 0    | 0 | 0     | 0     | 0 | 0    | 0     | 1 | 1 | 1           | 1 |
| GO:0042802 | 3  | 3  | 100   | 1.13 | 0 | 0     | 0    | 0 | 0     | 0     | 0 | 0    | 0     | 1 | 1 | 1           | 1 |
| GO:0042803 | 12 | 10 | 83.33 | 0.94 | 0 | 0     | 0    | 2 | 16.67 | 3.59  | 0 | 0    | 0     | 1 | 1 | 1           | 1 |
| GO:0042804 | 4  | 4  | 100   | 1.13 | 0 | 0     | 0    | 0 | 0     | 0     | 0 | 0    | 0     | 1 | 1 | 1           | 1 |
| GO:0042806 | 1  | 1  | 100   | 1.13 | 0 | 0     | 0    | 0 | 0     | 0     | 0 | 0    | 0     | 1 | 1 | 1           | 1 |
| GO:0042808 | 2  | 2  | 100   | 1.13 | 0 | 0     | 0    | 0 | 0     | 0     | 0 | 0    | 0     | 1 | 1 | 1           | 1 |
| GO:0042809 | 1  | 1  | 100   | 1.13 | 0 | 0     | 0    | 0 | 0     | 0     | 0 | 0    | 0     | 1 | 1 | 1           | 1 |
| GO:0042830 | 1  | 1  | 100   | 1.13 | 0 | 0     | 0    | 0 | 0     | 0     | 0 | 0    | 0     | 1 | 1 | 1           | 1 |
| GO:0042921 | 1  | 1  | 100   | 1.13 | 0 | 0     | 0    | 0 | 0     | 0     | 0 | 0    | 0     | 1 | 1 | 1           | 1 |
| GO:0042981 | 58 | 53 | 91.38 | 1.03 | 1 | 1.72  | 0.49 | 2 | 3.45  | 0.74  | 2 | 3.45 | 0.97  | 1 | 1 | 1           | 1 |
| GO:0042989 | 2  | 2  | 100   | 1.13 | 0 | 0     | 0    | 0 | 0     | 0     | 0 | 0    | 0     | 1 | 1 | 1           | 1 |
| GO:0042994 | 2  | 2  | 100   | 1.13 | 0 | 0     | 0    | 0 | 0     | 0     | 0 | 0    | 0     | 1 | 1 | 1           | 1 |
| GO:0043001 | 3  | 1  | 33.33 | 0.38 | 1 | 33.33 | 9.54 | 1 | 33.33 | 7.18  | 0 | 0    | 0     | 1 | 1 | 1           | 1 |
| GO:0043011 | 2  | 2  | 100   | 1.13 | 0 | 0     | 0    | 0 | 0     | 0     | 0 | 0    | 0     | 1 | 1 | 1           | 1 |
| GO:0043015 | 1  | 1  | 100   | 1.13 | 0 | 0     | 0    | 0 | 0     | 0     | 0 | 0    | 0     | 1 | 1 | 1           | 1 |
| GO:0043021 | 3  | 3  | 100   | 1.13 | 0 | 0     | 0    | 0 | 0     | 0     | 0 | 0    | 0     | 1 | 1 | 1           | 1 |
| GO:0043022 | 5  | 5  | 100   | 1.13 | 0 | 0     | 0    | 0 | 0     | 0     | 0 | 0    | 0     | 1 | 1 | 1           | 1 |
| GO:0043026 | 1  | 1  | 100   | 1.13 | 0 | 0     | 0    | 0 | 0     | 0     | 0 | 0    | 0     | 1 | 1 | 1           | 1 |
| GO:0043029 | 1  | 0  | 0     | 0    | 0 | 0     | 0    | 0 | 0     | 0     | 1 | 100  | 28.22 | 1 | 1 | 1           | 1 |
| GO:0043065 | 3  | 2  | 66.67 | 0.75 | 0 | 0     | 0    | 1 | 33.33 | 7.18  | 0 | 0    | 0     | 1 | 1 | 1           | 1 |
| GO:0043066 | 8  | 8  | 100   | 1.13 | 0 | 0     | 0    | 0 | 0     | 0     | 0 | 0    | 0     | 1 | 1 | 1           | 1 |
| GO:0043071 | 1  | 1  | 100   | 1.13 | 0 | 0     | 0    | 0 | 0     | 0     | 0 | 0    | 0     | 1 | 1 | 1           | 1 |
| GO:0043085 | 2  | 2  | 100   | 1.13 | 0 | 0     | 0    | 0 | 0     | 0     | 0 | 0    | 0     | 1 | 1 | 1           | 1 |
| GO:0043087 | 5  | 5  | 100   | 1.13 | 0 | 0     | 0    | 0 | 0     | 0     | 0 | 0    | 0     | 1 | 1 | 1           | 1 |
| GO:0043123 | 2  | 2  | 100   | 1.13 | 0 | 0     | 0    | 0 | 0     | 0     | 0 | 0    | 0     | 1 | 1 | 1           | 1 |
| GO:0045004 | 3  | 3  | 100   | 1.13 | 0 | 0     | 0    | 0 | 0     | 0     | 0 | 0    | 0     | 1 | 1 | 1           | 1 |
| GO:0045010 | 4  | 3  | 75    | 0.85 | 0 | 0     | 0    | 1 | 25    | 5.38  | 0 | 0    | 0     | 1 | 1 | 1           | 1 |
| GO:0045012 | 10 | 5  | 50    | 0.57 | 0 | 0     | 0    | 5 | 50    | 10.76 | 0 | 0    | 0     | 1 | 1 | 0.216534029 | 1 |
| GO:0045026 | 1  | 1  | 100   | 1.13 | 0 | 0     | 0    | 0 | 0     | 0     | 0 | 0    | 0     | 1 | 1 | 1           | 1 |
| GO:0045029 | 1  | 1  | 100   | 1.13 | 0 | 0     | 0    | 0 | 0     | 0     | 0 | 0    | 0     | 1 | 1 | 1           | 1 |
| GO:0045045 | 9  | 9  | 100   | 1.13 | 0 | 0     | 0    | 0 | 0     | 0     | 0 | 0    | 0     | 1 | 1 | 1           | 1 |

|            |    |    |       |      |   |       |       |   |       |       |   |       |       |   |   |   |   |
|------------|----|----|-------|------|---|-------|-------|---|-------|-------|---|-------|-------|---|---|---|---|
| GO:0045055 | 3  | 3  | 100   | 1.13 | 0 | 0     | 0     | 0 | 0     | 0     | 0 | 0     | 1     | 1 | 1 | 1 |   |
| GO:0045059 | 3  | 1  | 33.33 | 0.38 | 0 | 0     | 0     | 1 | 33.33 | 7.18  | 1 | 33.33 | 9.41  | 1 | 1 | 1 | 1 |
| GO:0045079 | 1  | 0  | 0     | 0    | 0 | 0     | 0     | 1 | 100   | 21.53 | 0 | 0     | 0     | 1 | 1 | 1 | 1 |
| GO:0045080 | 1  | 0  | 0     | 0    | 0 | 0     | 0     | 1 | 100   | 21.53 | 0 | 0     | 0     | 1 | 1 | 1 | 1 |
| GO:0045082 | 1  | 1  | 100   | 1.13 | 0 | 0     | 0     | 0 | 0     | 0     | 0 | 0     | 0     | 1 | 1 | 1 | 1 |
| GO:0045084 | 7  | 7  | 100   | 1.13 | 0 | 0     | 0     | 0 | 0     | 0     | 0 | 0     | 0     | 1 | 1 | 1 | 1 |
| GO:0045087 | 2  | 0  | 0     | 0    | 2 | 100   | 28.63 | 0 | 0     | 0     | 0 | 0     | 0     | 1 | 1 | 1 | 1 |
| GO:0045095 | 1  | 0  | 0     | 0    | 0 | 0     | 0     | 0 | 0     | 0     | 1 | 100   | 28.22 | 1 | 1 | 1 | 1 |
| GO:0045098 | 3  | 3  | 100   | 1.13 | 0 | 0     | 0     | 0 | 0     | 0     | 0 | 0     | 0     | 1 | 1 | 1 | 1 |
| GO:0045103 | 3  | 3  | 100   | 1.13 | 0 | 0     | 0     | 0 | 0     | 0     | 0 | 0     | 0     | 1 | 1 | 1 | 1 |
| GO:0045104 | 1  | 1  | 100   | 1.13 | 0 | 0     | 0     | 0 | 0     | 0     | 0 | 0     | 0     | 1 | 1 | 1 | 1 |
| GO:0045116 | 2  | 2  | 100   | 1.13 | 0 | 0     | 0     | 0 | 0     | 0     | 0 | 0     | 0     | 1 | 1 | 1 | 1 |
| GO:0045120 | 7  | 7  | 100   | 1.13 | 0 | 0     | 0     | 0 | 0     | 0     | 0 | 0     | 0     | 1 | 1 | 1 | 1 |
| GO:0045121 | 17 | 17 | 100   | 1.13 | 0 | 0     | 0     | 0 | 0     | 0     | 0 | 0     | 0     | 1 | 1 | 1 | 1 |
| GO:0045123 | 17 | 6  | 35.29 | 0.4  | 4 | 23.53 | 6.74  | 5 | 29.41 | 6.33  | 2 | 11.76 | 3.32  | 1 | 1 | 1 | 1 |
| GO:0045127 | 1  | 1  | 100   | 1.13 | 0 | 0     | 0     | 0 | 0     | 0     | 0 | 0     | 0     | 1 | 1 | 1 | 1 |
| GO:0045134 | 1  | 1  | 100   | 1.13 | 0 | 0     | 0     | 0 | 0     | 0     | 0 | 0     | 0     | 1 | 1 | 1 | 1 |
| GO:0045160 | 2  | 2  | 100   | 1.13 | 0 | 0     | 0     | 0 | 0     | 0     | 0 | 0     | 0     | 1 | 1 | 1 | 1 |
| GO:0045165 | 6  | 6  | 100   | 1.13 | 0 | 0     | 0     | 0 | 0     | 0     | 0 | 0     | 0     | 1 | 1 | 1 | 1 |
| GO:0045176 | 2  | 2  | 100   | 1.13 | 0 | 0     | 0     | 0 | 0     | 0     | 0 | 0     | 0     | 1 | 1 | 1 | 1 |
| GO:0045177 | 5  | 5  | 100   | 1.13 | 0 | 0     | 0     | 0 | 0     | 0     | 0 | 0     | 0     | 1 | 1 | 1 | 1 |
| GO:0045182 | 3  | 3  | 100   | 1.13 | 0 | 0     | 0     | 0 | 0     | 0     | 0 | 0     | 0     | 1 | 1 | 1 | 1 |
| GO:0045190 | 1  | 1  | 100   | 1.13 | 0 | 0     | 0     | 0 | 0     | 0     | 0 | 0     | 0     | 1 | 1 | 1 | 1 |
| GO:0045202 | 25 | 25 | 100   | 1.13 | 0 | 0     | 0     | 0 | 0     | 0     | 0 | 0     | 0     | 1 | 1 | 1 | 1 |
| GO:0045210 | 1  | 1  | 100   | 1.13 | 0 | 0     | 0     | 0 | 0     | 0     | 0 | 0     | 0     | 1 | 1 | 1 | 1 |
| GO:0045211 | 3  | 3  | 100   | 1.13 | 0 | 0     | 0     | 0 | 0     | 0     | 0 | 0     | 0     | 1 | 1 | 1 | 1 |
| GO:0045217 | 1  | 1  | 100   | 1.13 | 0 | 0     | 0     | 0 | 0     | 0     | 0 | 0     | 0     | 1 | 1 | 1 | 1 |
| GO:0045226 | 1  | 1  | 100   | 1.13 | 0 | 0     | 0     | 0 | 0     | 0     | 0 | 0     | 0     | 1 | 1 | 1 | 1 |
| GO:0045239 | 1  | 1  | 100   | 1.13 | 0 | 0     | 0     | 0 | 0     | 0     | 0 | 0     | 0     | 1 | 1 | 1 | 1 |
| GO:0045254 | 1  | 1  | 100   | 1.13 | 0 | 0     | 0     | 0 | 0     | 0     | 0 | 0     | 0     | 1 | 1 | 1 | 1 |
| GO:0045255 | 4  | 4  | 100   | 1.13 | 0 | 0     | 0     | 0 | 0     | 0     | 0 | 0     | 0     | 1 | 1 | 1 | 1 |
| GO:0045259 | 2  | 2  | 100   | 1.13 | 0 | 0     | 0     | 0 | 0     | 0     | 0 | 0     | 0     | 1 | 1 | 1 | 1 |
| GO:0045285 | 1  | 1  | 100   | 1.13 | 0 | 0     | 0     | 0 | 0     | 0     | 0 | 0     | 0     | 1 | 1 | 1 | 1 |
| GO:0045294 | 1  | 1  | 100   | 1.13 | 0 | 0     | 0     | 0 | 0     | 0     | 0 | 0     | 0     | 1 | 1 | 1 | 1 |
| GO:0045309 | 6  | 6  | 100   | 1.13 | 0 | 0     | 0     | 0 | 0     | 0     | 0 | 0     | 0     | 1 | 1 | 1 | 1 |
| GO:0045333 | 2  | 2  | 100   | 1.13 | 0 | 0     | 0     | 0 | 0     | 0     | 0 | 0     | 0     | 1 | 1 | 1 | 1 |
| GO:0045348 | 1  | 0  | 0     | 0    | 0 | 0     | 0     | 1 | 100   | 21.53 | 0 | 0     | 0     | 1 | 1 | 1 | 1 |
| GO:0045359 | 1  | 0  | 0     | 0    | 0 | 0     | 0     | 1 | 100   | 21.53 | 0 | 0     | 0     | 1 | 1 | 1 | 1 |
| GO:0045408 | 1  | 1  | 100   | 1.13 | 0 | 0     | 0     | 0 | 0     | 0     | 0 | 0     | 0     | 1 | 1 | 1 | 1 |
| GO:0045409 | 1  | 0  | 0     | 0    | 0 | 0     | 0     | 1 | 100   | 21.53 | 0 | 0     | 0     | 1 | 1 | 1 | 1 |
| GO:0045410 | 3  | 2  | 66.67 | 0.75 | 0 | 0     | 0     | 1 | 33.33 | 7.18  | 0 | 0     | 0     | 1 | 1 | 1 | 1 |

|            |    |    |       |      |   |       |      |   |       |       |    |       |      |   |   |   |             |
|------------|----|----|-------|------|---|-------|------|---|-------|-------|----|-------|------|---|---|---|-------------|
| GO:0045444 | 5  | 5  | 100   | 1.13 | 0 | 0     | 0    | 0 | 0     | 0     | 0  | 0     | 0    | 1 | 1 | 1 | 1           |
| GO:0045445 | 1  | 1  | 100   | 1.13 | 0 | 0     | 0    | 0 | 0     | 0     | 0  | 0     | 0    | 1 | 1 | 1 | 1           |
| GO:0045446 | 2  | 2  | 100   | 1.13 | 0 | 0     | 0    | 0 | 0     | 0     | 0  | 0     | 0    | 1 | 1 | 1 | 1           |
| GO:0045449 | 38 | 35 | 92.11 | 1.04 | 2 | 5.26  | 1.51 | 0 | 0     | 0     | 1  | 2.63  | 0.74 | 1 | 1 | 1 | 1           |
| GO:0045453 | 4  | 4  | 100   | 1.13 | 0 | 0     | 0    | 0 | 0     | 0     | 0  | 0     | 0    | 1 | 1 | 1 | 1           |
| GO:0045509 | 1  | 1  | 100   | 1.13 | 0 | 0     | 0    | 0 | 0     | 0     | 0  | 0     | 0    | 1 | 1 | 1 | 1           |
| GO:0045523 | 3  | 3  | 100   | 1.13 | 0 | 0     | 0    | 0 | 0     | 0     | 0  | 0     | 0    | 1 | 1 | 1 | 1           |
| GO:0045569 | 1  | 1  | 100   | 1.13 | 0 | 0     | 0    | 0 | 0     | 0     | 0  | 0     | 0    | 1 | 1 | 1 | 1           |
| GO:0045576 | 4  | 1  | 25    | 0.28 | 0 | 0     | 0    | 0 | 0     | 3     | 75 | 21.17 |      | 1 | 1 | 1 | 0.815577835 |
| GO:0045579 | 2  | 1  | 50    | 0.57 | 0 | 0     | 0    | 1 | 50    | 10.76 | 0  | 0     | 0    | 1 | 1 | 1 | 1           |
| GO:0045580 | 1  | 0  | 0     | 0    | 0 | 0     | 0    | 1 | 100   | 21.53 | 0  | 0     | 0    | 1 | 1 | 1 | 1           |
| GO:0045582 | 4  | 3  | 75    | 0.85 | 0 | 0     | 0    | 1 | 25    | 5.38  | 0  | 0     | 0    | 1 | 1 | 1 | 1           |
| GO:0045595 | 1  | 1  | 100   | 1.13 | 0 | 0     | 0    | 0 | 0     | 0     | 0  | 0     | 0    | 1 | 1 | 1 | 1           |
| GO:0045596 | 1  | 1  | 100   | 1.13 | 0 | 0     | 0    | 0 | 0     | 0     | 0  | 0     | 0    | 1 | 1 | 1 | 1           |
| GO:0045597 | 1  | 1  | 100   | 1.13 | 0 | 0     | 0    | 0 | 0     | 0     | 0  | 0     | 0    | 1 | 1 | 1 | 1           |
| GO:0045603 | 2  | 2  | 100   | 1.13 | 0 | 0     | 0    | 0 | 0     | 0     | 0  | 0     | 0    | 1 | 1 | 1 | 1           |
| GO:0045621 | 1  | 0  | 0     | 0    | 0 | 0     | 0    | 1 | 100   | 21.53 | 0  | 0     | 0    | 1 | 1 | 1 | 1           |
| GO:0045637 | 1  | 1  | 100   | 1.13 | 0 | 0     | 0    | 0 | 0     | 0     | 0  | 0     | 0    | 1 | 1 | 1 | 1           |
| GO:0045639 | 1  | 1  | 100   | 1.13 | 0 | 0     | 0    | 0 | 0     | 0     | 0  | 0     | 0    | 1 | 1 | 1 | 1           |
| GO:0045648 | 1  | 0  | 0     | 0    | 0 | 0     | 0    | 1 | 100   | 21.53 | 0  | 0     | 0    | 1 | 1 | 1 | 1           |
| GO:0045656 | 1  | 0  | 0     | 0    | 0 | 0     | 0    | 1 | 100   | 21.53 | 0  | 0     | 0    | 1 | 1 | 1 | 1           |
| GO:0045659 | 1  | 0  | 0     | 0    | 0 | 0     | 0    | 1 | 100   | 21.53 | 0  | 0     | 0    | 1 | 1 | 1 | 1           |
| GO:0045661 | 1  | 1  | 100   | 1.13 | 0 | 0     | 0    | 0 | 0     | 0     | 0  | 0     | 0    | 1 | 1 | 1 | 1           |
| GO:0045663 | 2  | 2  | 100   | 1.13 | 0 | 0     | 0    | 0 | 0     | 0     | 0  | 0     | 0    | 1 | 1 | 1 | 1           |
| GO:0045664 | 2  | 2  | 100   | 1.13 | 0 | 0     | 0    | 0 | 0     | 0     | 0  | 0     | 0    | 1 | 1 | 1 | 1           |
| GO:0045666 | 2  | 2  | 100   | 1.13 | 0 | 0     | 0    | 0 | 0     | 0     | 0  | 0     | 0    | 1 | 1 | 1 | 1           |
| GO:0045668 | 1  | 1  | 100   | 1.13 | 0 | 0     | 0    | 0 | 0     | 0     | 0  | 0     | 0    | 1 | 1 | 1 | 1           |
| GO:0045670 | 5  | 5  | 100   | 1.13 | 0 | 0     | 0    | 0 | 0     | 0     | 0  | 0     | 0    | 1 | 1 | 1 | 1           |
| GO:0045671 | 2  | 0  | 0     | 0    | 0 | 0     | 0    | 2 | 100   | 21.53 | 0  | 0     | 0    | 1 | 1 | 1 | 1           |
| GO:0045672 | 4  | 4  | 100   | 1.13 | 0 | 0     | 0    | 0 | 0     | 0     | 0  | 0     | 0    | 1 | 1 | 1 | 1           |
| GO:0045735 | 6  | 5  | 83.33 | 0.94 | 1 | 16.67 | 4.77 | 0 | 0     | 0     | 0  | 0     | 0    | 1 | 1 | 1 | 1           |
| GO:0045736 | 3  | 3  | 100   | 1.13 | 0 | 0     | 0    | 0 | 0     | 0     | 0  | 0     | 0    | 1 | 1 | 1 | 1           |
| GO:0045745 | 1  | 1  | 100   | 1.13 | 0 | 0     | 0    | 0 | 0     | 0     | 0  | 0     | 0    | 1 | 1 | 1 | 1           |
| GO:0045749 | 4  | 4  | 100   | 1.13 | 0 | 0     | 0    | 0 | 0     | 0     | 0  | 0     | 0    | 1 | 1 | 1 | 1           |
| GO:0045765 | 2  | 2  | 100   | 1.13 | 0 | 0     | 0    | 0 | 0     | 0     | 0  | 0     | 0    | 1 | 1 | 1 | 1           |
| GO:0045766 | 4  | 3  | 75    | 0.85 | 0 | 0     | 0    | 0 | 0     | 1     | 25 | 7.06  |      | 1 | 1 | 1 | 1           |
| GO:0045773 | 2  | 2  | 100   | 1.13 | 0 | 0     | 0    | 0 | 0     | 0     | 0  | 0     | 0    | 1 | 1 | 1 | 1           |
| GO:0045779 | 3  | 2  | 66.67 | 0.75 | 0 | 0     | 0    | 1 | 33.33 | 7.18  | 0  | 0     | 0    | 1 | 1 | 1 | 1           |
| GO:0045786 | 30 | 30 | 100   | 1.13 | 0 | 0     | 0    | 0 | 0     | 0     | 0  | 0     | 0    | 1 | 1 | 1 | 1           |
| GO:0045806 | 2  | 2  | 100   | 1.13 | 0 | 0     | 0    | 0 | 0     | 0     | 0  | 0     | 0    | 1 | 1 | 1 | 1           |
| GO:0045807 | 1  | 1  | 100   | 1.13 | 0 | 0     | 0    | 0 | 0     | 0     | 0  | 0     | 0    | 1 | 1 | 1 | 1           |

|            |    |    |       |      |   |      |      |   |      |       |   |       |       |   |   |   |   |
|------------|----|----|-------|------|---|------|------|---|------|-------|---|-------|-------|---|---|---|---|
| GO:0045834 | 1  | 0  | 0     | 0    | 0 | 0    | 0    | 0 | 0    | 0     | 1 | 100   | 28.22 | 1 | 1 | 1 | 1 |
| GO:0045859 | 1  | 1  | 100   | 1.13 | 0 | 0    | 0    | 0 | 0    | 0     | 0 | 0     | 0     | 1 | 1 | 1 | 1 |
| GO:0045861 | 1  | 1  | 100   | 1.13 | 0 | 0    | 0    | 0 | 0    | 0     | 0 | 0     | 0     | 1 | 1 | 1 | 1 |
| GO:0045884 | 1  | 1  | 100   | 1.13 | 0 | 0    | 0    | 0 | 0    | 0     | 0 | 0     | 0     | 1 | 1 | 1 | 1 |
| GO:0045892 | 1  | 1  | 100   | 1.13 | 0 | 0    | 0    | 0 | 0    | 0     | 0 | 0     | 0     | 1 | 1 | 1 | 1 |
| GO:0045893 | 6  | 6  | 100   | 1.13 | 0 | 0    | 0    | 0 | 0    | 0     | 0 | 0     | 0     | 1 | 1 | 1 | 1 |
| GO:0045910 | 2  | 2  | 100   | 1.13 | 0 | 0    | 0    | 0 | 0    | 0     | 0 | 0     | 0     | 1 | 1 | 1 | 1 |
| GO:0045926 | 2  | 2  | 100   | 1.13 | 0 | 0    | 0    | 0 | 0    | 0     | 0 | 0     | 0     | 1 | 1 | 1 | 1 |
| GO:0045930 | 1  | 1  | 100   | 1.13 | 0 | 0    | 0    | 0 | 0    | 0     | 0 | 0     | 0     | 1 | 1 | 1 | 1 |
| GO:0045941 | 6  | 6  | 100   | 1.13 | 0 | 0    | 0    | 0 | 0    | 0     | 0 | 0     | 0     | 1 | 1 | 1 | 1 |
| GO:0045944 | 42 | 39 | 92.86 | 1.05 | 0 | 0    | 0    | 2 | 4.76 | 1.03  | 1 | 2.38  | 0.67  | 1 | 1 | 1 | 1 |
| GO:0046032 | 2  | 2  | 100   | 1.13 | 0 | 0    | 0    | 0 | 0    | 0     | 0 | 0     | 0     | 1 | 1 | 1 | 1 |
| GO:0046208 | 3  | 3  | 100   | 1.13 | 0 | 0    | 0    | 0 | 0    | 0     | 0 | 0     | 0     | 1 | 1 | 1 | 1 |
| GO:0046328 | 3  | 3  | 100   | 1.13 | 0 | 0    | 0    | 0 | 0    | 0     | 0 | 0     | 0     | 1 | 1 | 1 | 1 |
| GO:0046330 | 1  | 1  | 100   | 1.13 | 0 | 0    | 0    | 0 | 0    | 0     | 0 | 0     | 0     | 1 | 1 | 1 | 1 |
| GO:0046332 | 1  | 1  | 100   | 1.13 | 0 | 0    | 0    | 0 | 0    | 0     | 0 | 0     | 0     | 1 | 1 | 1 | 1 |
| GO:0046340 | 1  | 1  | 100   | 1.13 | 0 | 0    | 0    | 0 | 0    | 0     | 0 | 0     | 0     | 1 | 1 | 1 | 1 |
| GO:0046398 | 1  | 1  | 100   | 1.13 | 0 | 0    | 0    | 0 | 0    | 0     | 0 | 0     | 0     | 1 | 1 | 1 | 1 |
| GO:0046488 | 6  | 6  | 100   | 1.13 | 0 | 0    | 0    | 0 | 0    | 0     | 0 | 0     | 0     | 1 | 1 | 1 | 1 |
| GO:0046513 | 3  | 3  | 100   | 1.13 | 0 | 0    | 0    | 0 | 0    | 0     | 0 | 0     | 0     | 1 | 1 | 1 | 1 |
| GO:0046514 | 1  | 1  | 100   | 1.13 | 0 | 0    | 0    | 0 | 0    | 0     | 0 | 0     | 0     | 1 | 1 | 1 | 1 |
| GO:0046527 | 1  | 1  | 100   | 1.13 | 0 | 0    | 0    | 0 | 0    | 0     | 0 | 0     | 0     | 1 | 1 | 1 | 1 |
| GO:0046540 | 2  | 2  | 100   | 1.13 | 0 | 0    | 0    | 0 | 0    | 0     | 0 | 0     | 0     | 1 | 1 | 1 | 1 |
| GO:0046581 | 3  | 2  | 66.67 | 0.75 | 0 | 0    | 0    | 0 | 0    | 0     | 1 | 33.33 | 9.41  | 1 | 1 | 1 | 1 |
| GO:0046592 | 3  | 3  | 100   | 1.13 | 0 | 0    | 0    | 0 | 0    | 0     | 0 | 0     | 0     | 1 | 1 | 1 | 1 |
| GO:0046604 | 4  | 4  | 100   | 1.13 | 0 | 0    | 0    | 0 | 0    | 0     | 0 | 0     | 0     | 1 | 1 | 1 | 1 |
| GO:0046626 | 7  | 7  | 100   | 1.13 | 0 | 0    | 0    | 0 | 0    | 0     | 0 | 0     | 0     | 1 | 1 | 1 | 1 |
| GO:0046651 | 3  | 3  | 100   | 1.13 | 0 | 0    | 0    | 0 | 0    | 0     | 0 | 0     | 0     | 1 | 1 | 1 | 1 |
| GO:0046652 | 7  | 7  | 100   | 1.13 | 0 | 0    | 0    | 0 | 0    | 0     | 0 | 0     | 0     | 1 | 1 | 1 | 1 |
| GO:0046653 | 1  | 1  | 100   | 1.13 | 0 | 0    | 0    | 0 | 0    | 0     | 0 | 0     | 0     | 1 | 1 | 1 | 1 |
| GO:0046685 | 2  | 1  | 50    | 0.57 | 0 | 0    | 0    | 1 | 50   | 10.76 | 0 | 0     | 0     | 1 | 1 | 1 | 1 |
| GO:0046709 | 2  | 2  | 100   | 1.13 | 0 | 0    | 0    | 0 | 0    | 0     | 0 | 0     | 0     | 1 | 1 | 1 | 1 |
| GO:0046716 | 4  | 3  | 75    | 0.85 | 0 | 0    | 0    | 0 | 0    | 0     | 1 | 25    | 7.06  | 1 | 1 | 1 | 1 |
| GO:0046777 | 15 | 14 | 93.33 | 1.06 | 1 | 6.67 | 1.91 | 0 | 0    | 0     | 0 | 0     | 0     | 1 | 1 | 1 | 1 |
| GO:0046831 | 2  | 2  | 100   | 1.13 | 0 | 0    | 0    | 0 | 0    | 0     | 0 | 0     | 0     | 1 | 1 | 1 | 1 |
| GO:0046854 | 1  | 1  | 100   | 1.13 | 0 | 0    | 0    | 0 | 0    | 0     | 0 | 0     | 0     | 1 | 1 | 1 | 1 |
| GO:0046872 | 44 | 43 | 97.73 | 1.11 | 0 | 0    | 0    | 1 | 2.27 | 0.49  | 0 | 0     | 0     | 1 | 1 | 1 | 1 |
| GO:0046873 | 6  | 6  | 100   | 1.13 | 0 | 0    | 0    | 0 | 0    | 0     | 0 | 0     | 0     | 1 | 1 | 1 | 1 |
| GO:0046879 | 2  | 2  | 100   | 1.13 | 0 | 0    | 0    | 0 | 0    | 0     | 0 | 0     | 0     | 1 | 1 | 1 | 1 |
| GO:0046907 | 1  | 1  | 100   | 1.13 | 0 | 0    | 0    | 0 | 0    | 0     | 0 | 0     | 0     | 1 | 1 | 1 | 1 |
| GO:0046933 | 71 | 67 | 94.37 | 1.07 | 1 | 1.41 | 0.4  | 3 | 4.23 | 0.91  | 0 | 0     | 0     | 1 | 1 | 1 | 1 |

|            |    |    |       |      |   |      |     |   |       |       |   |     |       |   |   |   |             |
|------------|----|----|-------|------|---|------|-----|---|-------|-------|---|-----|-------|---|---|---|-------------|
| GO:0046935 | 3  | 3  | 100   | 1.13 | 0 | 0    | 0   | 0 | 0     | 0     | 0 | 0   | 0     | 1 | 1 | 1 | 1           |
| GO:0046961 | 71 | 67 | 94.37 | 1.07 | 1 | 1.41 | 0.4 | 3 | 4.23  | 0.91  | 0 | 0   | 0     | 1 | 1 | 1 | 1           |
| GO:0046967 | 1  | 1  | 100   | 1.13 | 0 | 0    | 0   | 0 | 0     | 0     | 0 | 0   | 0     | 1 | 1 | 1 | 1           |
| GO:0046979 | 1  | 1  | 100   | 1.13 | 0 | 0    | 0   | 0 | 0     | 0     | 0 | 0   | 0     | 1 | 1 | 1 | 1           |
| GO:0046980 | 1  | 1  | 100   | 1.13 | 0 | 0    | 0   | 0 | 0     | 0     | 0 | 0   | 0     | 1 | 1 | 1 | 1           |
| GO:0046982 | 7  | 7  | 100   | 1.13 | 0 | 0    | 0   | 0 | 0     | 0     | 0 | 0   | 0     | 1 | 1 | 1 | 1           |
| GO:0047237 | 1  | 1  | 100   | 1.13 | 0 | 0    | 0   | 0 | 0     | 0     | 0 | 0   | 0     | 1 | 1 | 1 | 1           |
| GO:0047238 | 1  | 1  | 100   | 1.13 | 0 | 0    | 0   | 0 | 0     | 0     | 0 | 0   | 0     | 1 | 1 | 1 | 1           |
| GO:0047290 | 1  | 1  | 100   | 1.13 | 0 | 0    | 0   | 0 | 0     | 0     | 0 | 0   | 0     | 1 | 1 | 1 | 1           |
| GO:0047499 | 4  | 4  | 100   | 1.13 | 0 | 0    | 0   | 0 | 0     | 0     | 0 | 0   | 0     | 1 | 1 | 1 | 1           |
| GO:0047598 | 1  | 1  | 100   | 1.13 | 0 | 0    | 0   | 0 | 0     | 0     | 0 | 0   | 0     | 1 | 1 | 1 | 1           |
| GO:0047760 | 1  | 0  | 0     | 0    | 0 | 0    | 0   | 1 | 100   | 21.53 | 0 | 0   | 0     | 1 | 1 | 1 | 1           |
| GO:0048002 | 4  | 3  | 75    | 0.85 | 0 | 0    | 0   | 1 | 25    | 5.38  | 0 | 0   | 0     | 1 | 1 | 1 | 1           |
| GO:0048004 | 2  | 2  | 100   | 1.13 | 0 | 0    | 0   | 0 | 0     | 0     | 0 | 0   | 0     | 1 | 1 | 1 | 1           |
| GO:0048005 | 7  | 4  | 57.14 | 0.65 | 0 | 0    | 0   | 3 | 42.86 | 9.23  | 0 | 0   | 0     | 1 | 1 | 1 | 1           |
| GO:0048008 | 3  | 3  | 100   | 1.13 | 0 | 0    | 0   | 0 | 0     | 0     | 0 | 0   | 0     | 1 | 1 | 1 | 1           |
| GO:0048011 | 1  | 1  | 100   | 1.13 | 0 | 0    | 0   | 0 | 0     | 0     | 0 | 0   | 0     | 1 | 1 | 1 | 1           |
| GO:0048037 | 3  | 3  | 100   | 1.13 | 0 | 0    | 0   | 0 | 0     | 0     | 0 | 0   | 0     | 1 | 1 | 1 | 1           |
| GO:0048066 | 4  | 4  | 100   | 1.13 | 0 | 0    | 0   | 0 | 0     | 0     | 0 | 0   | 0     | 1 | 1 | 1 | 1           |
| GO:0048147 | 1  | 1  | 100   | 1.13 | 0 | 0    | 0   | 0 | 0     | 0     | 0 | 0   | 0     | 1 | 1 | 1 | 1           |
| GO:0048168 | 3  | 3  | 100   | 1.13 | 0 | 0    | 0   | 0 | 0     | 0     | 0 | 0   | 0     | 1 | 1 | 1 | 1           |
| GO:0048227 | 1  | 1  | 100   | 1.13 | 0 | 0    | 0   | 0 | 0     | 0     | 0 | 0   | 0     | 1 | 1 | 1 | 1           |
| GO:0048255 | 1  | 1  | 100   | 1.13 | 0 | 0    | 0   | 0 | 0     | 0     | 0 | 0   | 0     | 1 | 1 | 1 | 1           |
| GO:0048256 | 3  | 3  | 100   | 1.13 | 0 | 0    | 0   | 0 | 0     | 0     | 0 | 0   | 0     | 1 | 1 | 1 | 1           |
| GO:0048265 | 1  | 1  | 100   | 1.13 | 0 | 0    | 0   | 0 | 0     | 0     | 0 | 0   | 0     | 1 | 1 | 1 | 1           |
| GO:0048268 | 1  | 1  | 100   | 1.13 | 0 | 0    | 0   | 0 | 0     | 0     | 0 | 0   | 0     | 1 | 1 | 1 | 1           |
| GO:0048270 | 1  | 1  | 100   | 1.13 | 0 | 0    | 0   | 0 | 0     | 0     | 0 | 0   | 0     | 1 | 1 | 1 | 1           |
| GO:0050031 | 1  | 1  | 100   | 1.13 | 0 | 0    | 0   | 0 | 0     | 0     | 0 | 0   | 0     | 1 | 1 | 1 | 1           |
| GO:0050220 | 2  | 2  | 100   | 1.13 | 0 | 0    | 0   | 0 | 0     | 0     | 0 | 0   | 0     | 1 | 1 | 1 | 1           |
| GO:0050508 | 1  | 1  | 100   | 1.13 | 0 | 0    | 0   | 0 | 0     | 0     | 0 | 0   | 0     | 1 | 1 | 1 | 1           |
| GO:0050613 | 1  | 1  | 100   | 1.13 | 0 | 0    | 0   | 0 | 0     | 0     | 0 | 0   | 0     | 1 | 1 | 1 | 1           |
| GO:0050653 | 1  | 1  | 100   | 1.13 | 0 | 0    | 0   | 0 | 0     | 0     | 0 | 0   | 0     | 1 | 1 | 1 | 1           |
| GO:0050655 | 2  | 2  | 100   | 1.13 | 0 | 0    | 0   | 0 | 0     | 0     | 0 | 0   | 0     | 1 | 1 | 1 | 1           |
| GO:0050660 | 2  | 2  | 100   | 1.13 | 0 | 0    | 0   | 0 | 0     | 0     | 0 | 0   | 0     | 1 | 1 | 1 | 1           |
| GO:0050708 | 1  | 1  | 100   | 1.13 | 0 | 0    | 0   | 0 | 0     | 0     | 0 | 0   | 0     | 1 | 1 | 1 | 1           |
| GO:0050714 | 2  | 2  | 100   | 1.13 | 0 | 0    | 0   | 0 | 0     | 0     | 0 | 0   | 0     | 1 | 1 | 1 | 1           |
| GO:0050728 | 1  | 0  | 0     | 0    | 0 | 0    | 0   | 0 | 0     | 0     | 1 | 100 | 28.22 | 1 | 1 | 1 | 1           |
| GO:0050729 | 1  | 1  | 100   | 1.13 | 0 | 0    | 0   | 0 | 0     | 0     | 0 | 0   | 0     | 1 | 1 | 1 | 1           |
| GO:0050730 | 6  | 6  | 100   | 1.13 | 0 | 0    | 0   | 0 | 0     | 0     | 0 | 0   | 0     | 1 | 1 | 1 | 1           |
| GO:0050766 | 12 | 6  | 50    | 0.57 | 0 | 0    | 0   | 3 | 25    | 5.38  | 3 | 25  | 7.06  | 1 | 1 | 1 | 1           |
| GO:0050776 | 4  | 1  | 25    | 0.28 | 0 | 0    | 0   | 0 | 0     | 0     | 3 | 75  | 21.17 | 1 | 1 | 1 | 0.815577835 |

|            |    |    |       |      |   |   |   |   |       |       |   |   |   |   |   |             |   |
|------------|----|----|-------|------|---|---|---|---|-------|-------|---|---|---|---|---|-------------|---|
| GO:0050777 | 4  | 0  | 0     | 0    | 0 | 0 | 0 | 4 | 100   | 21.53 | 0 | 0 | 0 | 1 | 1 | 0.021406639 | 1 |
| GO:0050778 | 3  | 2  | 66.67 | 0.75 | 0 | 0 | 0 | 1 | 33.33 | 7.18  | 0 | 0 | 0 | 1 | 1 | 1           | 1 |
| GO:0050808 | 1  | 1  | 100   | 1.13 | 0 | 0 | 0 | 0 | 0     | 0     | 0 | 0 | 0 | 1 | 1 | 1           | 1 |
| GO:0050819 | 11 | 11 | 100   | 1.13 | 0 | 0 | 0 | 0 | 0     | 0     | 0 | 0 | 0 | 1 | 1 | 1           | 1 |
| GO:0050821 | 4  | 4  | 100   | 1.13 | 0 | 0 | 0 | 0 | 0     | 0     | 0 | 0 | 0 | 1 | 1 | 1           | 1 |
| GO:0050828 | 1  | 1  | 100   | 1.13 | 0 | 0 | 0 | 0 | 0     | 0     | 0 | 0 | 0 | 1 | 1 | 1           | 1 |
| GO:0050869 | 1  | 0  | 0     | 0    | 0 | 0 | 0 | 1 | 100   | 21.53 | 0 | 0 | 0 | 1 | 1 | 1           | 1 |
| GO:0050892 | 1  | 1  | 100   | 1.13 | 0 | 0 | 0 | 0 | 0     | 0     | 0 | 0 | 0 | 1 | 1 | 1           | 1 |
| GO:0050896 | 5  | 5  | 100   | 1.13 | 0 | 0 | 0 | 0 | 0     | 0     | 0 | 0 | 0 | 1 | 1 | 1           | 1 |
| GO:0050897 | 1  | 1  | 100   | 1.13 | 0 | 0 | 0 | 0 | 0     | 0     | 0 | 0 | 0 | 1 | 1 | 1           | 1 |
| GO:0050909 | 2  | 2  | 100   | 1.13 | 0 | 0 | 0 | 0 | 0     | 0     | 0 | 0 | 0 | 1 | 1 | 1           | 1 |
| GO:0050930 | 6  | 5  | 83.33 | 0.94 | 0 | 0 | 0 | 1 | 16.67 | 3.59  | 0 | 0 | 0 | 1 | 1 | 1           | 1 |
| GO:0050983 | 1  | 1  | 100   | 1.13 | 0 | 0 | 0 | 0 | 0     | 0     | 0 | 0 | 0 | 1 | 1 | 1           | 1 |
| GO:0051014 | 1  | 1  | 100   | 1.13 | 0 | 0 | 0 | 0 | 0     | 0     | 0 | 0 | 0 | 1 | 1 | 1           | 1 |
| GO:0051016 | 4  | 3  | 75    | 0.85 | 0 | 0 | 0 | 1 | 25    | 5.38  | 0 | 0 | 0 | 1 | 1 | 1           | 1 |
| GO:0051018 | 1  | 1  | 100   | 1.13 | 0 | 0 | 0 | 0 | 0     | 0     | 0 | 0 | 0 | 1 | 1 | 1           | 1 |

| Library ID | Total | #A  | %A    | Change A | #B | %B   | Change B | #C   | %C   | Change C | #D   | %D   | Change D | p-value A   | p-value B | p-value C | p-value D |
|------------|-------|-----|-------|----------|----|------|----------|------|------|----------|------|------|----------|-------------|-----------|-----------|-----------|
| 6          | 598   | 529 | 88.46 |          | 1  | 22   | 3.68     | 1.05 | 35   | 5.85     | 1.26 | 12   | 2.01     | 0.57        | 1         | 1         | 1         |
| 7          | 74    | 67  | 90.54 | 1.03     | 4  | 5.41 | 1.55     | 1    | 1.35 | 0.29     | 2    | 2.7  | 0.76     | 1           | 1         | 1         | 1         |
| 9          | 24    | 21  | 87.5  | 0.99     | 1  | 4.17 | 1.19     | 2    | 8.33 | 1.79     | 0    | 0    | 0        | 1           | 1         | 1         | 1         |
| 10         | 30    | 28  | 93.33 | 1.06     | 2  | 6.67 | 1.91     | 0    | 0    | 0        | 0    | 0    | 0        | 1           | 1         | 1         | 1         |
| 11         | 584   | 513 | 87.84 | 0.99     | 18 | 3.08 | 0.88     | 34   | 5.82 | 1.25     | 19   | 3.25 | 0.92     | 1           | 1         | 1         | 1         |
| 12         | 200   | 191 | 95.5  | 1.08     | 1  | 0.5  | 0.14     | 6    | 3    | 0.65     | 2    | 1    | 0.28     | 0.022153176 | 1         | 1         | 1         |
| 13         | 197   | 172 | 87.31 | 0.99     | 4  | 2.03 | 0.58     | 14   | 7.11 | 1.53     | 7    | 3.55 | 1        | 1           | 1         | 1         | 1         |
| 15         | 269   | 246 | 91.45 | 1.04     | 12 | 4.46 | 1.28     | 8    | 2.97 | 0.64     | 3    | 1.12 | 0.31     | 1           | 1         | 1         | 1         |
| 16         | 72    | 59  | 81.94 | 0.93     | 2  | 2.78 | 0.8      | 6    | 8.33 | 1.79     | 5    | 6.94 | 1.96     | 1           | 1         | 1         | 1         |
| 17         | 294   | 253 | 86.05 | 0.97     | 11 | 3.74 | 1.07     | 14   | 4.76 | 1.03     | 16   | 5.44 | 1.54     | 1           | 1         | 1         | 1         |
| 18         | 431   | 379 | 87.94 |          | 1  | 8    | 1.86     | 0.53 | 33   | 7.66     | 1.65 | 11   | 2.55     | 0.72        | 1         | 1         | 1         |
| 20         | 253   | 219 | 86.56 | 0.98     | 7  | 2.77 | 0.79     | 14   | 5.53 | 1.19     | 13   | 5.14 | 1.45     | 1           | 1         | 1         | 1         |
| 22         | 158   | 140 | 88.61 |          | 1  | 2    | 1.27     | 0.36 | 10   | 6.33     | 1.36 | 6    | 3.8      | 1.07        | 1         | 1         | 1         |
| 23         | 498   | 438 | 87.95 |          | 1  | 16   | 3.21     | 0.92 | 27   | 5.42     | 1.17 | 17   | 3.41     | 0.96        | 1         | 1         | 1         |
| 24         | 448   | 421 | 93.97 | 1.06     | 11 | 2.46 | 0.7      | 15   | 3.35 | 0.72     | 1    | 0.22 | 0.06     | 0.000820283 | 1         | 1         | 1         |
| 25         | 144   | 123 | 85.42 | 0.97     | 10 | 6.94 | 1.99     | 8    | 5.56 | 1.2      | 3    | 2.08 | 0.59     | 1           | 1         | 1         | 1         |
| 26         | 617   | 562 | 91.09 | 1.03     | 24 | 3.89 | 1.11     | 26   | 4.21 | 0.91     | 5    | 0.81 | 0.23     | 0.604831935 | 1         | 1         | 1         |
| 27         | 218   | 197 | 90.37 | 1.02     | 6  | 2.75 | 0.79     | 9    | 4.13 | 0.89     | 6    | 2.75 | 0.78     | 1           | 1         | 1         | 1         |
| 28         | 446   | 409 | 91.7  | 1.04     | 14 | 3.14 | 0.9      | 15   | 3.36 | 0.72     | 8    | 1.79 | 0.51     | 0.624479222 | 1         | 1         | 1         |
| 29         | 145   | 127 | 87.59 | 0.99     | 6  | 4.14 | 1.18     | 6    | 4.14 | 0.89     | 6    | 4.14 | 1.17     | 1           | 1         | 1         | 1         |
| 30         | 82    | 75  | 91.46 | 1.04     | 2  | 2.44 | 0.7      | 1    | 1.22 | 0.26     | 4    | 4.88 | 1.38     | 1           | 1         | 1         | 1         |
| 31         | 175   | 154 | 88    |          | 1  | 8    | 4.57     | 1.31 | 7    | 4        | 0.86 | 6    | 3.43     | 0.97        | 1         | 1         | 1         |
| 32         | 66    | 61  | 92.42 | 1.05     | 1  | 1.52 | 0.43     | 1    | 1.52 | 0.33     | 3    | 4.55 | 1.28     | 1           | 1         | 1         | 1         |

|    |     |     |       |      |    |       |      |    |       |       |    |       |       |             |   |   |   |
|----|-----|-----|-------|------|----|-------|------|----|-------|-------|----|-------|-------|-------------|---|---|---|
| 33 | 56  | 47  | 83.93 | 0.95 | 3  | 5.36  | 1.53 | 4  | 7.14  | 1.54  | 2  | 3.57  | 1.01  | 1           | 1 | 1 | 1 |
| 34 | 16  | 14  | 87.5  | 0.99 | 1  | 6.25  | 1.79 | 1  | 6.25  | 1.35  | 0  | 0     | 0     | 1           | 1 | 1 | 1 |
| 35 | 10  | 10  | 100   | 1.13 | 0  | 0     | 0    | 0  | 0     | 0     | 0  | 0     | 0     | 1           | 1 | 1 | 1 |
| 36 | 34  | 31  | 91.18 | 1.03 | 1  | 2.94  | 0.84 | 2  | 5.88  | 1.27  | 0  | 0     | 0     | 1           | 1 | 1 | 1 |
| 37 | 31  | 30  | 96.77 | 1.1  | 1  | 3.23  | 0.92 | 0  | 0     | 0     | 0  | 0     | 0     | 1           | 1 | 1 | 1 |
| 38 | 104 | 87  | 83.65 | 0.95 | 3  | 2.88  | 0.83 | 6  | 5.77  | 1.24  | 8  | 7.69  | 2.17  | 1           | 1 | 1 | 1 |
| 39 | 10  | 10  | 100   | 1.13 | 0  | 0     | 0    | 0  | 0     | 0     | 0  | 0     | 0     | 1           | 1 | 1 | 1 |
| 40 | 86  | 76  | 88.37 | 1    | 3  | 3.49  | 1    | 6  | 6.98  | 1.5   | 1  | 1.16  | 0.33  | 1           | 1 | 1 | 1 |
| 41 | 7   | 6   | 85.71 | 0.97 | 0  | 0     | 0    | 1  | 14.29 | 3.08  | 0  | 0     | 0     | 1           | 1 | 1 | 1 |
| 42 | 7   | 5   | 71.43 | 0.81 | 2  | 28.57 | 8.18 | 0  | 0     | 0     | 0  | 0     | 0     | 1           | 1 | 1 | 1 |
| 44 | 41  | 37  | 90.24 | 1.02 | 2  | 4.88  | 1.4  | 0  | 0     | 0     | 2  | 4.88  | 1.38  | 1           | 1 | 1 | 1 |
| 46 | 149 | 126 | 84.56 | 0.96 | 4  | 2.68  | 0.77 | 9  | 6.04  | 1.3   | 10 | 6.71  | 1.89  | 1           | 1 | 1 | 1 |
| 47 | 326 | 285 | 87.42 | 0.99 | 16 | 4.91  | 1.41 | 16 | 4.91  | 1.06  | 9  | 2.76  | 0.78  | 1           | 1 | 1 | 1 |
| 48 | 228 | 196 | 85.96 | 0.97 | 7  | 3.07  | 0.88 | 11 | 4.82  | 1.04  | 14 | 6.14  | 1.73  | 1           | 1 | 1 | 1 |
| 49 | 775 | 668 | 86.19 | 0.98 | 31 | 4     | 1.15 | 49 | 6.32  | 1.36  | 27 | 3.48  | 0.98  | 1           | 1 | 1 | 1 |
| 50 | 106 | 90  | 84.91 | 0.96 | 1  | 0.94  | 0.27 | 8  | 7.55  | 1.62  | 7  | 6.6   | 1.86  | 1           | 1 | 1 | 1 |
| 51 | 17  | 16  | 94.12 | 1.07 | 1  | 5.88  | 1.68 | 0  | 0     | 0     | 0  | 0     | 0     | 1           | 1 | 1 | 1 |
| 52 | 12  | 10  | 83.33 | 0.94 | 2  | 16.67 | 4.77 | 0  | 0     | 0     | 0  | 0     | 0     | 1           | 1 | 1 | 1 |
| 53 | 233 | 209 | 89.7  | 1.02 | 6  | 2.58  | 0.74 | 13 | 5.58  | 1.2   | 5  | 2.15  | 0.61  | 1           | 1 | 1 | 1 |
| 54 | 90  | 70  | 77.78 | 0.88 | 3  | 3.33  | 0.95 | 10 | 11.11 | 2.39  | 7  | 7.78  | 2.2   | 1           | 1 | 1 | 1 |
| 55 | 17  | 12  | 70.59 | 0.8  | 2  | 11.76 | 3.37 | 3  | 17.65 | 3.8   | 0  | 0     | 0     | 1           | 1 | 1 | 1 |
| 56 | 5   | 4   | 80    | 0.91 | 1  | 20    | 5.73 | 0  | 0     | 0     | 0  | 0     | 0     | 1           | 1 | 1 | 1 |
| 57 | 590 | 544 | 92.2  | 1.04 | 16 | 2.71  | 0.78 | 20 | 3.39  | 0.73  | 10 | 1.69  | 0.48  | 0.030483418 | 1 | 1 | 1 |
| 58 | 243 | 208 | 85.6  | 0.97 | 14 | 5.76  | 1.65 | 10 | 4.12  | 0.89  | 11 | 4.53  | 1.28  | 1           | 1 | 1 | 1 |
| 59 | 105 | 95  | 90.48 | 1.02 | 3  | 2.86  | 0.82 | 5  | 4.76  | 1.03  | 2  | 1.9   | 0.54  | 1           | 1 | 1 | 1 |
| 60 | 259 | 235 | 90.73 | 1.03 | 11 | 4.25  | 1.22 | 6  | 2.32  | 0.5   | 7  | 2.7   | 0.76  | 1           | 1 | 1 | 1 |
| 61 | 2   | 1   | 50    | 0.57 | 0  | 0     | 0    | 1  | 50    | 10.76 | 0  | 0     | 0     | 1           | 1 | 1 | 1 |
| 62 | 40  | 36  | 90    | 1.02 | 2  | 5     | 1.43 | 1  | 2.5   | 0.54  | 1  | 2.5   | 0.71  | 1           | 1 | 1 | 1 |
| 63 | 323 | 276 | 85.45 | 0.97 | 16 | 4.95  | 1.42 | 17 | 5.26  | 1.13  | 14 | 4.33  | 1.22  | 1           | 1 | 1 | 1 |
| 64 | 277 | 248 | 89.53 | 1.01 | 15 | 5.42  | 1.55 | 11 | 3.97  | 0.85  | 3  | 1.08  | 0.31  | 1           | 1 | 1 | 1 |
| 65 | 68  | 60  | 88.24 | 1    | 3  | 4.41  | 1.26 | 3  | 4.41  | 0.95  | 2  | 2.94  | 0.83  | 1           | 1 | 1 | 1 |
| 66 | 9   | 5   | 55.56 | 0.63 | 1  | 11.11 | 3.18 | 3  | 33.33 | 7.18  | 0  | 0     | 0     | 1           | 1 | 1 | 1 |
| 67 | 199 | 180 | 90.45 | 1.02 | 10 | 5.03  | 1.44 | 5  | 2.51  | 0.54  | 4  | 2.01  | 0.57  | 1           | 1 | 1 | 1 |
| 68 | 137 | 120 | 87.59 | 0.99 | 6  | 4.38  | 1.25 | 9  | 6.57  | 1.41  | 2  | 1.46  | 0.41  | 1           | 1 | 1 | 1 |
| 70 | 13  | 8   | 61.54 | 0.7  | 2  | 15.38 | 4.41 | 1  | 7.69  | 1.66  | 2  | 15.38 | 4.34  | 1           | 1 | 1 | 1 |
| 71 | 94  | 84  | 89.36 | 1.01 | 2  | 2.13  | 0.61 | 4  | 4.26  | 0.92  | 4  | 4.26  | 1.2   | 1           | 1 | 1 | 1 |
| 72 | 2   | 2   | 100   | 1.13 | 0  | 0     | 0    | 0  | 0     | 0     | 0  | 0     | 0     | 1           | 1 | 1 | 1 |
| 73 | 13  | 10  | 76.92 | 0.87 | 1  | 7.69  | 2.2  | 0  | 0     | 0     | 2  | 15.38 | 4.34  | 1           | 1 | 1 | 1 |
| 74 | 114 | 106 | 92.98 | 1.05 | 3  | 2.63  | 0.75 | 5  | 4.39  | 0.94  | 0  | 0     | 0     | 1           | 1 | 1 | 1 |
| 75 | 23  | 19  | 82.61 | 0.94 | 1  | 4.35  | 1.24 | 2  | 8.7   | 1.87  | 1  | 4.35  | 1.23  | 1           | 1 | 1 | 1 |
| 76 | 2   | 0   | 0     | 0    | 0  | 0     | 0    | 1  | 50    | 10.76 | 1  | 50    | 14.11 | 1           | 1 | 1 | 1 |



|    |    |     |     |       |      |    |      |      |    |       |       |    |       |       |   |             |             |             |
|----|----|-----|-----|-------|------|----|------|------|----|-------|-------|----|-------|-------|---|-------------|-------------|-------------|
|    | 77 | 1   | 0   | 0     | 0    | 0  | 0    | 0    | 0  | 0     | 0     | 1  | 100   | 28.22 | 1 | 1           | 1           | 1           |
|    | 79 | 1   | 1   | 100   | 1.13 | 0  | 0    | 0    | 0  | 0     | 0     | 0  | 0     | 0     | 1 | 1           | 1           | 1           |
|    | 80 | 87  | 77  | 88.51 | 1    | 5  | 5.75 | 1.65 | 3  | 3.45  | 0.74  | 2  | 2.3   | 0.65  | 1 | 1           | 1           | 1           |
|    | 81 | 3   | 3   | 100   | 1.13 | 0  | 0    | 0    | 0  | 0     | 0     | 0  | 0     | 0     | 1 | 1           | 1           | 1           |
|    | 82 | 3   | 1   | 33.33 | 0.38 | 0  | 0    | 0    | 2  | 66.67 | 14.35 | 0  | 0     | 0     | 1 | 1           | 1           | 1           |
|    | 84 | 72  | 58  | 80.56 | 0.91 | 5  | 6.94 | 1.99 | 5  | 6.94  | 1.49  | 4  | 5.56  | 1.57  | 1 | 1           | 1           | 1           |
|    | 85 | 3   | 3   | 100   | 1.13 | 0  | 0    | 0    | 0  | 0     | 0     | 0  | 0     | 0     | 1 | 1           | 1           | 1           |
|    | 90 | 135 | 103 | 76.3  | 0.86 | 9  | 6.67 | 1.91 | 10 | 7.41  | 1.59  | 13 | 9.63  | 2.72  | 1 | 1           | 1           | 0.562755353 |
|    | 91 | 157 | 127 | 80.89 | 0.92 | 5  | 3.18 | 0.91 | 10 | 6.37  | 1.37  | 15 | 9.55  | 2.7   | 1 | 1           | 1           | 0.2954558   |
|    | 92 | 52  | 38  | 73.08 | 0.83 | 4  | 7.69 | 2.2  | 2  | 3.85  | 0.83  | 8  | 15.38 | 4.34  | 1 | 1           | 1           | 0.196353872 |
|    | 93 | 212 | 182 | 85.85 | 0.97 | 10 | 4.72 | 1.35 | 12 | 5.66  | 1.22  | 8  | 3.77  | 1.07  | 1 | 1           | 1           | 1           |
|    | 94 | 204 | 182 | 89.22 | 1.01 | 5  | 2.45 | 0.7  | 8  | 3.92  | 0.84  | 9  | 4.41  | 1.25  | 1 | 1           | 1           | 1           |
|    | 95 | 224 | 189 | 84.38 | 0.96 | 8  | 3.57 | 1.02 | 16 | 7.14  | 1.54  | 11 | 4.91  | 1.39  | 1 | 1           | 1           | 1           |
|    | 96 | 234 | 202 | 86.32 | 0.98 | 11 | 4.7  | 1.35 | 11 | 4.7   | 1.01  | 10 | 4.27  | 1.21  | 1 | 1           | 1           | 1           |
|    | 98 | 219 | 172 | 78.54 | 0.89 | 14 | 6.39 | 1.83 | 20 | 9.13  | 1.97  | 13 | 5.94  | 1.68  | 1 | 1           | 1           | 1           |
|    | 99 | 143 | 116 | 81.12 | 0.92 | 8  | 5.59 | 1.6  | 9  | 6.29  | 1.35  | 10 | 6.99  | 1.97  | 1 | 1           | 1           | 1           |
| A0 |    | 43  | 38  | 88.37 | 1    | 1  | 2.33 | 0.67 | 0  | 0     | 0     | 4  | 9.3   | 2.63  | 1 | 1           | 1           | 1           |
| A1 |    | 215 | 169 | 78.6  | 0.89 | 12 | 5.58 | 1.6  | 23 | 10.7  | 2.3   | 11 | 5.12  | 1.44  | 1 | 1           | 0.106395474 | 1           |
| A2 |    | 289 | 253 | 87.54 | 0.99 | 12 | 4.15 | 1.19 | 8  | 2.77  | 0.6   | 16 | 5.54  | 1.56  | 1 | 1           | 1           | 1           |
| A3 |    | 206 | 176 | 85.44 | 0.97 | 13 | 6.31 | 1.81 | 6  | 2.91  | 0.63  | 11 | 5.34  | 1.51  | 1 | 1           | 1           | 1           |
| A4 |    | 291 | 239 | 82.13 | 0.93 | 7  | 2.41 | 0.69 | 18 | 6.19  | 1.33  | 27 | 9.28  | 2.62  | 1 | 1           | 1           | 0.007513119 |
| A5 |    | 288 | 212 | 73.61 | 0.83 | 20 | 6.94 | 1.99 | 14 | 4.86  | 1.05  | 42 | 14.58 | 4.12  | 1 | 1           | 1           | 4.98E-11    |
| A6 |    | 378 | 324 | 85.71 | 0.97 | 14 | 3.7  | 1.06 | 23 | 6.08  | 1.31  | 17 | 4.5   | 1.27  | 1 | 1           | 1           | 1           |
| A7 |    | 278 | 242 | 87.05 | 0.99 | 18 | 6.47 | 1.85 | 10 | 3.6   | 0.77  | 8  | 2.88  | 0.81  | 1 | 1           | 1           | 1           |
| A8 |    | 237 | 204 | 86.08 | 0.97 | 21 | 8.86 | 2.54 | 7  | 2.95  | 0.64  | 5  | 2.11  | 0.6   | 1 | 0.045636663 | 1           | 1           |
| A9 |    | 239 | 214 | 89.54 | 1.01 | 5  | 2.09 | 0.6  | 9  | 3.77  | 0.81  | 11 | 4.6   | 1.3   | 1 | 1           | 1           | 1           |
| AA |    | 18  | 16  | 88.89 | 1.01 | 1  | 5.56 | 1.59 | 0  | 0     | 0     | 1  | 5.56  | 1.57  | 1 | 1           | 1           | 1           |
| AB |    | 14  | 12  | 85.71 | 0.97 | 1  | 7.14 | 2.05 | 1  | 7.14  | 1.54  | 0  | 0     | 0     | 1 | 1           | 1           | 1           |
| AC |    | 9   | 9   | 100   | 1.13 | 0  | 0    | 0    | 0  | 0     | 0     | 0  | 0     | 0     | 1 | 1           | 1           | 1           |
| AD |    | 14  | 12  | 85.71 | 0.97 | 0  | 0    | 0    | 1  | 7.14  | 1.54  | 1  | 7.14  | 2.02  | 1 | 1           | 1           | 1           |
| AE |    | 22  | 22  | 100   | 1.13 | 0  | 0    | 0    | 0  | 0     | 0     | 0  | 0     | 0     | 1 | 1           | 1           | 1           |
| AF |    | 12  | 11  | 91.67 | 1.04 | 0  | 0    | 0    | 1  | 8.33  | 1.79  | 0  | 0     | 0     | 1 | 1           | 1           | 1           |
| AG |    | 12  | 10  | 83.33 | 0.94 | 1  | 8.33 | 2.39 | 0  | 0     | 0     | 1  | 8.33  | 2.35  | 1 | 1           | 1           | 1           |
| AH |    | 20  | 19  | 95    | 1.08 | 1  | 5    | 1.43 | 0  | 0     | 0     | 0  | 0     | 0     | 1 | 1           | 1           | 1           |
| AI |    | 15  | 15  | 100   | 1.13 | 0  | 0    | 0    | 0  | 0     | 0     | 0  | 0     | 0     | 1 | 1           | 1           | 1           |
| AJ |    | 13  | 13  | 100   | 1.13 | 0  | 0    | 0    | 0  | 0     | 0     | 0  | 0     | 0     | 1 | 1           | 1           | 1           |
| AK |    | 13  | 13  | 100   | 1.13 | 0  | 0    | 0    | 0  | 0     | 0     | 0  | 0     | 0     | 1 | 1           | 1           | 1           |
| AL |    | 6   | 6   | 100   | 1.13 | 0  | 0    | 0    | 0  | 0     | 0     | 0  | 0     | 0     | 1 | 1           | 1           | 1           |
| AM |    | 17  | 17  | 100   | 1.13 | 0  | 0    | 0    | 0  | 0     | 0     | 0  | 0     | 0     | 1 | 1           | 1           | 1           |
| AN |    | 20  | 20  | 100   | 1.13 | 0  | 0    | 0    | 0  | 0     | 0     | 0  | 0     | 0     | 1 | 1           | 1           | 1           |
| AO |    | 13  | 11  | 84.62 | 0.96 | 1  | 7.69 | 2.2  | 1  | 7.69  | 1.66  | 0  | 0     | 0     | 1 | 1           | 1           | 1           |

|    |     |     |       |      |    |       |      |    |       |      |    |       |      |             |   |   |
|----|-----|-----|-------|------|----|-------|------|----|-------|------|----|-------|------|-------------|---|---|
| AP | 6   | 6   | 100   | 1.13 | 0  | 0     | 0    | 0  | 0     | 0    | 0  | 0     | 1    | 1           | 1 | 1 |
| AQ | 4   | 4   | 100   | 1.13 | 0  | 0     | 0    | 0  | 0     | 0    | 0  | 0     | 1    | 1           | 1 | 1 |
| AR | 16  | 13  | 81.25 | 0.92 | 0  | 0     | 0    | 3  | 18.75 | 4.04 | 0  | 0     | 1    | 1           | 1 | 1 |
| AS | 9   | 9   | 100   | 1.13 | 0  | 0     | 0    | 0  | 0     | 0    | 0  | 0     | 1    | 1           | 1 | 1 |
| AT | 6   | 3   | 50    | 0.57 | 0  | 0     | 0    | 2  | 33.33 | 7.18 | 1  | 16.67 | 4.7  | 1           | 1 | 1 |
| AU | 13  | 13  | 100   | 1.13 | 0  | 0     | 0    | 0  | 0     | 0    | 0  | 0     | 1    | 1           | 1 | 1 |
| AV | 11  | 9   | 81.82 | 0.93 | 0  | 0     | 0    | 0  | 0     | 0    | 2  | 18.18 | 5.13 | 1           | 1 | 1 |
| AW | 15  | 14  | 93.33 | 1.06 | 1  | 6.67  | 1.91 | 0  | 0     | 0    | 0  | 0     | 1    | 1           | 1 | 1 |
| AX | 11  | 10  | 90.91 | 1.03 | 0  | 0     | 0    | 1  | 9.09  | 1.96 | 0  | 0     | 0    | 1           | 1 | 1 |
| AY | 6   | 6   | 100   | 1.13 | 0  | 0     | 0    | 0  | 0     | 0    | 0  | 0     | 1    | 1           | 1 | 1 |
| AZ | 28  | 27  | 96.43 | 1.09 | 0  | 0     | 0    | 1  | 3.57  | 0.77 | 0  | 0     | 0    | 1           | 1 | 1 |
| B0 | 95  | 85  | 89.47 | 1.01 | 3  | 3.16  | 0.9  | 4  | 4.21  | 0.91 | 3  | 3.16  | 0.89 | 1           | 1 | 1 |
| B1 | 211 | 193 | 91.47 | 1.04 | 14 | 6.64  | 1.9  | 4  | 1.9   | 0.41 | 0  | 0     | 0    | 1           | 1 | 1 |
| B2 | 426 | 369 | 86.62 | 0.98 | 23 | 5.4   | 1.55 | 23 | 5.4   | 1.16 | 11 | 2.58  | 0.73 | 1           | 1 | 1 |
| B3 | 22  | 19  | 86.36 | 0.98 | 0  | 0     | 0    | 1  | 4.55  | 0.98 | 2  | 9.09  | 2.57 | 1           | 1 | 1 |
| B4 | 137 | 115 | 83.94 | 0.95 | 6  | 4.38  | 1.25 | 8  | 5.84  | 1.26 | 8  | 5.84  | 1.65 | 1           | 1 | 1 |
| B5 | 10  | 9   | 90    | 1.02 | 0  | 0     | 0    | 1  | 10    | 2.15 | 0  | 0     | 0    | 1           | 1 | 1 |
| B6 | 18  | 17  | 94.44 | 1.07 | 0  | 0     | 0    | 1  | 5.56  | 1.2  | 0  | 0     | 0    | 1           | 1 | 1 |
| B7 | 11  | 11  | 100   | 1.13 | 0  | 0     | 0    | 0  | 0     | 0    | 0  | 0     | 0    | 1           | 1 | 1 |
| B8 | 48  | 43  | 89.58 | 1.01 | 2  | 4.17  | 1.19 | 2  | 4.17  | 0.9  | 1  | 2.08  | 0.59 | 1           | 1 | 1 |
| B9 | 169 | 161 | 95.27 | 1.08 | 2  | 1.18  | 0.34 | 6  | 3.55  | 0.76 | 0  | 0     | 0    | 0.120333538 | 1 | 1 |
| BA | 10  | 9   | 90    | 1.02 | 1  | 10    | 2.86 | 0  | 0     | 0    | 0  | 0     | 0    | 1           | 1 | 1 |
| BB | 13  | 11  | 84.62 | 0.96 | 0  | 0     | 0    | 2  | 15.38 | 3.31 | 0  | 0     | 0    | 1           | 1 | 1 |
| BC | 6   | 6   | 100   | 1.13 | 0  | 0     | 0    | 0  | 0     | 0    | 0  | 0     | 0    | 1           | 1 | 1 |
| BD | 19  | 16  | 84.21 | 0.95 | 2  | 10.53 | 3.01 | 0  | 0     | 0    | 1  | 5.26  | 1.49 | 1           | 1 | 1 |
| BE | 18  | 12  | 66.67 | 0.75 | 1  | 5.56  | 1.59 | 2  | 11.11 | 2.39 | 3  | 16.67 | 4.7  | 1           | 1 | 1 |
| BF | 8   | 5   | 62.5  | 0.71 | 0  | 0     | 0    | 2  | 25    | 5.38 | 1  | 12.5  | 3.53 | 1           | 1 | 1 |
| BG | 16  | 15  | 93.75 | 1.06 | 1  | 6.25  | 1.79 | 0  | 0     | 0    | 0  | 0     | 0    | 1           | 1 | 1 |
| BH | 14  | 13  | 92.86 | 1.05 | 1  | 7.14  | 2.05 | 0  | 0     | 0    | 0  | 0     | 0    | 1           | 1 | 1 |
| BI | 29  | 27  | 93.1  | 1.05 | 0  | 0     | 0    | 1  | 3.45  | 0.74 | 1  | 3.45  | 0.97 | 1           | 1 | 1 |
| BK | 8   | 7   | 87.5  | 0.99 | 1  | 12.5  | 3.58 | 0  | 0     | 0    | 0  | 0     | 0    | 1           | 1 | 1 |
| BL | 16  | 16  | 100   | 1.13 | 0  | 0     | 0    | 0  | 0     | 0    | 0  | 0     | 0    | 1           | 1 | 1 |
| BM | 3   | 3   | 100   | 1.13 | 0  | 0     | 0    | 0  | 0     | 0    | 0  | 0     | 0    | 1           | 1 | 1 |
| BN | 33  | 32  | 96.97 | 1.1  | 0  | 0     | 0    | 1  | 3.03  | 0.65 | 0  | 0     | 0    | 1           | 1 | 1 |
| BO | 50  | 48  | 96    | 1.09 | 0  | 0     | 0    | 2  | 4     | 0.86 | 0  | 0     | 0    | 1           | 1 | 1 |
| BP | 40  | 35  | 87.5  | 0.99 | 1  | 2.5   | 0.72 | 1  | 2.5   | 0.54 | 3  | 7.5   | 2.12 | 1           | 1 | 1 |
| BQ | 47  | 44  | 93.62 | 1.06 | 0  | 0     | 0    | 1  | 2.13  | 0.46 | 2  | 4.26  | 1.2  | 1           | 1 | 1 |
| BR | 41  | 39  | 95.12 | 1.08 | 2  | 4.88  | 1.4  | 0  | 0     | 0    | 0  | 0     | 0    | 1           | 1 | 1 |
| BS | 82  | 79  | 96.34 | 1.09 | 1  | 1.22  | 0.35 | 1  | 1.22  | 0.26 | 1  | 1.22  | 0.34 | 1           | 1 | 1 |
| BT | 43  | 42  | 97.67 | 1.11 | 1  | 2.33  | 0.67 | 0  | 0     | 0    | 0  | 0     | 0    | 1           | 1 | 1 |
| BU | 19  | 18  | 94.74 | 1.07 | 1  | 5.26  | 1.51 | 0  | 0     | 0    | 0  | 0     | 0    | 1           | 1 | 1 |

|    |     |     |       |      |    |       |      |    |       |       |    |       |      |             |   |             |             |
|----|-----|-----|-------|------|----|-------|------|----|-------|-------|----|-------|------|-------------|---|-------------|-------------|
| BY | 170 | 159 | 93.53 | 1.06 | 2  | 1.18  | 0.34 | 9  | 5.29  | 1.14  | 0  | 0     | 0    | 1           | 1 | 1           | 1           |
| BZ | 207 | 200 | 96.62 | 1.09 | 3  | 1.45  | 0.41 | 4  | 1.93  | 0.42  | 0  | 0     | 0    | 0.000928342 | 1 | 1           | 1           |
| C0 | 65  | 57  | 87.69 | 0.99 | 4  | 6.15  | 1.76 | 1  | 1.54  | 0.33  | 3  | 4.62  | 1.3  | 1           | 1 | 1           | 1           |
| C1 | 376 | 323 | 85.9  | 0.97 | 23 | 6.12  | 1.75 | 12 | 3.19  | 0.69  | 18 | 4.79  | 1.35 | 1           | 1 | 1           | 1           |
| C2 | 239 | 221 | 92.47 | 1.05 | 8  | 3.35  | 0.96 | 3  | 1.26  | 0.27  | 7  | 2.93  | 0.83 | 1           | 1 | 1           | 1           |
| C3 | 204 | 191 | 93.63 | 1.06 | 7  | 3.43  | 0.98 | 3  | 1.47  | 0.32  | 3  | 1.47  | 0.42 | 0.673618946 | 1 | 1           | 1           |
| C4 | 158 | 151 | 95.57 | 1.08 | 1  | 0.63  | 0.18 | 3  | 1.9   | 0.41  | 3  | 1.9   | 0.54 | 0.108522028 | 1 | 1           | 1           |
| C5 | 166 | 153 | 92.17 | 1.04 | 4  | 2.41  | 0.69 | 6  | 3.61  | 0.78  | 3  | 1.81  | 0.51 | 1           | 1 | 1           | 1           |
| C6 | 182 | 161 | 88.46 | 1    | 6  | 3.3   | 0.94 | 6  | 3.3   | 0.71  | 9  | 4.95  | 1.4  | 1           | 1 | 1           | 1           |
| C7 | 291 | 197 | 67.7  | 0.77 | 14 | 4.81  | 1.38 | 30 | 10.31 | 2.22  | 50 | 17.18 | 4.85 | 1           | 1 | 0.031259706 | 2.51E-16    |
| C8 | 84  | 76  | 90.48 | 1.02 | 4  | 4.76  | 1.36 | 1  | 1.19  | 0.26  | 3  | 3.57  | 1.01 | 1           | 1 | 1           | 1           |
| C9 | 102 | 84  | 82.35 | 0.93 | 4  | 3.92  | 1.12 | 6  | 5.88  | 1.27  | 8  | 7.84  | 2.21 | 1           | 1 | 1           | 1           |
| CA | 84  | 79  | 94.05 | 1.06 | 2  | 2.38  | 0.68 | 2  | 2.38  | 0.51  | 1  | 1.19  | 0.34 | 1           | 1 | 1           | 1           |
| CB | 80  | 78  | 97.5  | 1.1  | 0  | 0     | 0    | 0  | 0     | 0     | 2  | 2.5   | 0.71 | 0.38693388  | 1 | 1           | 1           |
| CC | 137 | 134 | 97.81 | 1.11 | 1  | 0.73  | 0.21 | 2  | 1.46  | 0.31  | 0  | 0     | 0    | 0.003428601 | 1 | 1           | 1           |
| CD | 67  | 62  | 92.54 | 1.05 | 1  | 1.49  | 0.43 | 3  | 4.48  | 0.96  | 1  | 1.49  | 0.42 | 1           | 1 | 1           | 1           |
| CE | 132 | 126 | 95.45 | 1.08 | 2  | 1.52  | 0.43 | 2  | 1.52  | 0.33  | 2  | 1.52  | 0.43 | 0.383764482 | 1 | 1           | 1           |
| CF | 167 | 152 | 91.02 | 1.03 | 4  | 2.4   | 0.69 | 4  | 2.4   | 0.52  | 7  | 4.19  | 1.18 | 1           | 1 | 1           | 1           |
| CG | 70  | 65  | 92.86 | 1.05 | 1  | 1.43  | 0.41 | 4  | 5.71  | 1.23  | 0  | 0     | 0    | 1           | 1 | 1           | 1           |
| CI | 1   | 1   | 100   | 1.13 | 0  | 0     | 0    | 0  | 0     | 0     | 0  | 0     | 0    | 1           | 1 | 1           | 1           |
| CR | 2   | 2   | 100   | 1.13 | 0  | 0     | 0    | 0  | 0     | 0     | 0  | 0     | 0    | 1           | 1 | 1           | 1           |
| CS | 1   | 1   | 100   | 1.13 | 0  | 0     | 0    | 0  | 0     | 0     | 0  | 0     | 0    | 1           | 1 | 1           | 1           |
| CT | 3   | 3   | 100   | 1.13 | 0  | 0     | 0    | 0  | 0     | 0     | 0  | 0     | 0    | 1           | 1 | 1           | 1           |
| CV | 1   | 1   | 100   | 1.13 | 0  | 0     | 0    | 0  | 0     | 0     | 0  | 0     | 0    | 1           | 1 | 1           | 1           |
| D0 | 223 | 193 | 86.55 | 0.98 | 13 | 5.83  | 1.67 | 8  | 3.59  | 0.77  | 9  | 4.04  | 1.14 | 1           | 1 | 1           | 1           |
| D1 | 328 | 288 | 87.8  | 0.99 | 15 | 4.57  | 1.31 | 17 | 5.18  | 1.12  | 8  | 2.44  | 0.69 | 1           | 1 | 1           | 1           |
| D2 | 149 | 128 | 85.91 | 0.97 | 12 | 8.05  | 2.31 | 6  | 4.03  | 0.87  | 3  | 2.01  | 0.57 | 1           | 1 | 1           | 1           |
| D3 | 222 | 198 | 89.19 | 1.01 | 12 | 5.41  | 1.55 | 4  | 1.8   | 0.39  | 8  | 3.6   | 1.02 | 1           | 1 | 1           | 1           |
| D4 | 138 | 122 | 88.41 | 1    | 2  | 1.45  | 0.41 | 9  | 6.52  | 1.4   | 5  | 3.62  | 1.02 | 1           | 1 | 1           | 1           |
| D5 | 52  | 43  | 82.69 | 0.94 | 6  | 11.54 | 3.3  | 1  | 1.92  | 0.41  | 2  | 3.85  | 1.09 | 1           | 1 | 1           | 1           |
| D6 | 134 | 113 | 84.33 | 0.95 | 3  | 2.24  | 0.64 | 10 | 7.46  | 1.61  | 8  | 5.97  | 1.68 | 1           | 1 | 1           | 1           |
| D7 | 79  | 65  | 82.28 | 0.93 | 3  | 3.8   | 1.09 | 2  | 2.53  | 0.54  | 9  | 11.39 | 3.22 | 1           | 1 | 1           | 0.82744797  |
| D8 | 78  | 58  | 74.36 | 0.84 | 7  | 8.97  | 2.57 | 5  | 6.41  | 1.38  | 8  | 10.26 | 2.89 | 1           | 1 | 1           | 1           |
| D9 | 147 | 130 | 88.44 | 1    | 7  | 4.76  | 1.36 | 5  | 3.4   | 0.73  | 5  | 3.4   | 0.96 | 1           | 1 | 1           | 1           |
| DC | 4   | 4   | 100   | 1.13 | 0  | 0     | 0    | 0  | 0     | 0     | 0  | 0     | 0    | 1           | 1 | 1           | 1           |
| DE | 1   | 0   | 0     | 0    | 0  | 0     | 0    | 1  | 100   | 21.53 | 0  | 0     | 0    | 1           | 1 | 1           | 1           |
| DG | 56  | 53  | 94.64 | 1.07 | 2  | 3.57  | 1.02 | 1  | 1.79  | 0.38  | 0  | 0     | 0    | 1           | 1 | 1           | 1           |
| DP | 2   | 2   | 100   | 1.13 | 0  | 0     | 0    | 0  | 0     | 0     | 0  | 0     | 0    | 1           | 1 | 1           | 1           |
| E0 | 184 | 153 | 83.15 | 0.94 | 8  | 4.35  | 1.24 | 7  | 3.8   | 0.82  | 16 | 8.7   | 2.45 | 1           | 1 | 1           | 0.551527511 |
| E1 | 333 | 308 | 92.49 | 1.05 | 4  | 1.2   | 0.34 | 9  | 2.7   | 0.58  | 12 | 3.6   | 1.02 | 0.479831088 | 1 | 1           | 1           |
| E2 | 100 | 83  | 83    | 0.94 | 4  | 4     | 1.15 | 6  | 6     | 1.29  | 7  | 7     | 1.98 | 1           | 1 | 1           | 1           |

|    |      |      |       |      |    |      |      |    |       |       |    |      |      |             |   |             |   |
|----|------|------|-------|------|----|------|------|----|-------|-------|----|------|------|-------------|---|-------------|---|
| E3 | 153  | 132  | 86.27 | 0.98 | 6  | 3.92 | 1.12 | 7  | 4.58  | 0.98  | 8  | 5.23 | 1.48 | 1           | 1 | 1           | 1 |
| E4 | 694  | 630  | 90.78 | 1.03 | 23 | 3.31 | 0.95 | 25 | 3.6   | 0.78  | 16 | 2.31 | 0.65 | 0.792092257 | 1 | 1           | 1 |
| E5 | 20   | 18   | 90    | 1.02 | 0  | 0    | 0    | 1  | 5     | 1.08  | 1  | 5    | 1.41 | 1           | 1 | 1           | 1 |
| E6 | 3    | 3    | 100   | 1.13 | 0  | 0    | 0    | 0  | 0     | 0     | 0  | 0    | 0    | 1           | 1 | 1           | 1 |
| E8 | 14   | 14   | 100   | 1.13 | 0  | 0    | 0    | 0  | 0     | 0     | 0  | 0    | 0    | 1           | 1 | 1           | 1 |
| E9 | 36   | 33   | 91.67 | 1.04 | 0  | 0    | 0    | 3  | 8.33  | 1.79  | 0  | 0    | 0    | 1           | 1 | 1           | 1 |
| F4 | 191  | 161  | 84.29 | 0.95 | 12 | 6.28 | 1.8  | 8  | 4.19  | 0.9   | 10 | 5.24 | 1.48 | 1           | 1 | 1           | 1 |
| F5 | 89   | 74   | 83.15 | 0.94 | 2  | 2.25 | 0.64 | 5  | 5.62  | 1.21  | 8  | 8.99 | 2.54 | 1           | 1 | 1           | 1 |
| F6 | 1390 | 1227 | 88.27 | 1    | 30 | 2.16 | 0.62 | 83 | 5.97  | 1.29  | 50 | 3.6  | 1.02 | 1           | 1 | 1           | 1 |
| F7 | 289  | 244  | 84.43 | 0.96 | 10 | 3.46 | 0.99 | 19 | 6.57  | 1.42  | 16 | 5.54 | 1.56 | 1           | 1 | 1           | 1 |
| F8 | 803  | 683  | 85.06 | 0.96 | 25 | 3.11 | 0.89 | 60 | 7.47  | 1.61  | 35 | 4.36 | 1.23 | 1           | 1 | 0.266688663 | 1 |
| F9 | 225  | 199  | 88.44 | 1    | 8  | 3.56 | 1.02 | 13 | 5.78  | 1.24  | 5  | 2.22 | 0.63 | 1           | 1 | 1           | 1 |
| G1 | 4    | 4    | 100   | 1.13 | 0  | 0    | 0    | 0  | 0     | 0     | 0  | 0    | 0    | 1           | 1 | 1           | 1 |
| G2 | 163  | 153  | 93.87 | 1.06 | 7  | 4.29 | 1.23 | 1  | 0.61  | 0.13  | 2  | 1.23 | 0.35 | 1           | 1 | 1           | 1 |
| G3 | 152  | 138  | 90.79 | 1.03 | 5  | 3.29 | 0.94 | 6  | 3.95  | 0.85  | 3  | 1.97 | 0.56 | 1           | 1 | 1           | 1 |
| G4 | 11   | 11   | 100   | 1.13 | 0  | 0    | 0    | 0  | 0     | 0     | 0  | 0    | 0    | 1           | 1 | 1           | 1 |
| G5 | 260  | 238  | 91.54 | 1.04 | 5  | 1.92 | 0.55 | 11 | 4.23  | 0.91  | 6  | 2.31 | 0.65 | 1           | 1 | 1           | 1 |
| G6 | 11   | 10   | 90.91 | 1.03 | 0  | 0    | 0    | 0  | 0     | 0     | 1  | 9.09 | 2.57 | 1           | 1 | 1           | 1 |
| G7 | 292  | 274  | 93.84 | 1.06 | 7  | 2.4  | 0.69 | 4  | 1.37  | 0.29  | 7  | 2.4  | 0.68 | 0.056378085 | 1 | 1           | 1 |
| G8 | 173  | 156  | 90.17 | 1.02 | 6  | 3.47 | 0.99 | 8  | 4.62  | 1     | 3  | 1.73 | 0.49 | 1           | 1 | 1           | 1 |
| G9 | 124  | 115  | 92.74 | 1.05 | 1  | 0.81 | 0.23 | 7  | 5.65  | 1.22  | 1  | 0.81 | 0.23 | 1           | 1 | 1           | 1 |
| I0 | 7    | 6    | 85.71 | 0.97 | 0  | 0    | 0    | 1  | 14.29 | 3.08  | 0  | 0    | 0    | 1           | 1 | 1           | 1 |
| I1 | 317  | 303  | 95.58 | 1.08 | 4  | 1.26 | 0.36 | 7  | 2.21  | 0.48  | 3  | 0.95 | 0.27 | 0.000149846 | 1 | 1           | 1 |
| I4 | 441  | 409  | 92.74 | 1.05 | 8  | 1.81 | 0.52 | 18 | 4.08  | 0.88  | 6  | 1.36 | 0.38 | 0.04985844  | 1 | 1           | 1 |
| I5 | 11   | 11   | 100   | 1.13 | 0  | 0    | 0    | 0  | 0     | 0     | 0  | 0    | 0    | 1           | 1 | 1           | 1 |
| I6 | 1    | 1    | 100   | 1.13 | 0  | 0    | 0    | 0  | 0     | 0     | 0  | 0    | 0    | 1           | 1 | 1           | 1 |
| I7 | 16   | 15   | 93.75 | 1.06 | 0  | 0    | 0    | 1  | 6.25  | 1.35  | 0  | 0    | 0    | 1           | 1 | 1           | 1 |
| I8 | 1023 | 936  | 91.5  | 1.04 | 14 | 1.37 | 0.39 | 46 | 4.5   | 0.97  | 27 | 2.64 | 0.74 | 0.004847755 | 1 | 1           | 1 |
| I9 | 50   | 47   | 94    | 1.06 | 0  | 0    | 0    | 2  | 4     | 0.86  | 1  | 2    | 0.56 | 1           | 1 | 1           | 1 |
| K0 | 10   | 9    | 90    | 1.02 | 0  | 0    | 0    | 1  | 10    | 2.15  | 0  | 0    | 0    | 1           | 1 | 1           | 1 |
| K1 | 2    | 1    | 50    | 0.57 | 0  | 0    | 0    | 1  | 50    | 10.76 | 0  | 0    | 0    | 1           | 1 | 1           | 1 |
| K2 | 56   | 51   | 91.07 | 1.03 | 2  | 3.57 | 1.02 | 2  | 3.57  | 0.77  | 1  | 1.79 | 0.5  | 1           | 1 | 1           | 1 |
| K3 | 1    | 1    | 100   | 1.13 | 0  | 0    | 0    | 0  | 0     | 0     | 0  | 0    | 0    | 1           | 1 | 1           | 1 |
| K4 | 32   | 27   | 84.38 | 0.96 | 0  | 0    | 0    | 2  | 6.25  | 1.35  | 3  | 9.38 | 2.65 | 1           | 1 | 1           | 1 |
| K5 | 57   | 55   | 96.49 | 1.09 | 0  | 0    | 0    | 1  | 1.75  | 0.38  | 1  | 1.75 | 0.5  | 1           | 1 | 1           | 1 |
| K8 | 1    | 1    | 100   | 1.13 | 0  | 0    | 0    | 0  | 0     | 0     | 0  | 0    | 0    | 1           | 1 | 1           | 1 |
| K9 | 2    | 2    | 100   | 1.13 | 0  | 0    | 0    | 0  | 0     | 0     | 0  | 0    | 0    | 1           | 1 | 1           | 1 |
| L2 | 1    | 1    | 100   | 1.13 | 0  | 0    | 0    | 0  | 0     | 0     | 0  | 0    | 0    | 1           | 1 | 1           | 1 |
| L9 | 1    | 1    | 100   | 1.13 | 0  | 0    | 0    | 0  | 0     | 0     | 0  | 0    | 0    | 1           | 1 | 1           | 1 |
| M4 | 5    | 5    | 100   | 1.13 | 0  | 0    | 0    | 0  | 0     | 0     | 0  | 0    | 0    | 1           | 1 | 1           | 1 |
| M5 | 113  | 102  | 90.27 | 1.02 | 5  | 4.42 | 1.27 | 4  | 3.54  | 0.76  | 2  | 1.77 | 0.5  | 1           | 1 | 1           | 1 |
